# Supplementary material
Source: MDPI journal article supplement (https://www.mdpi.com/2071-1050/10/3/837)
Supplement: s1 [file s1]

| KOD<br>GUS | Municipality         | Internal net migration per 1,000 people 2003–2010 [person] |      |      |      |      |      |      |      |      |      |      |      |      |      |      |      |
|------------|----------------------|------------------------------------------------------------|------|------|------|------|------|------|------|------|------|------|------|------|------|------|------|
|            |                      | 1995                                                       | 1996 | 1997 | 1998 | 1999 | 2000 | 2001 | 2002 | 2003 | 2004 | 2005 | 2006 | 2007 | 2008 | 2009 | 2010 |
| 0214011    | Oleśnica (1)         | -6,2                                                       | -2,9 | -4,1 | -5,5 | -4,6 | -6,2 | -3,2 | -4,8 | -5,7 | -3,9 | -4,3 | -5,5 | -4,6 | -0,9 | -0,2 | 1,6  |
| 0214032    | Dobroszyce (2)       | 0,9                                                        | 1,6  | 3,9  | 2,6  | 3,2  | 4,0  | 0,2  | 2,2  | 1,5  | 0,1  | -0,6 | 0,2  | -0,1 | 0,0  | -2,1 | -1,4 |
| 0214062    | Oleśnica (2)         | -2,8                                                       | -2,8 | -1,2 | -7,1 | -7,5 | -0,2 | -6,9 | 1,4  | -7,7 | -7,2 | 4,2  | -0,9 | 5,0  | -3,4 | 0,5  | 7,2  |
| 0215011    | Oława (1)            | 1,4                                                        | 1,1  | 1,0  | 0,9  | 1,2  | 1,9  | 2,7  | 3,7  | 4,1  | 3,8  | 4,7  | 4,9  | 3,3  | 2,1  | 2,0  | 2,1  |
| 0215022    | Domaniów (2)         | -2,0                                                       | 1,1  | -0,2 | -0,7 | 3,3  | 3,5  | 0,3  | 2,8  | -0,7 | -2,2 | 0,5  | 3,6  | 0,1  | 5,0  | 0,4  | 10,0 |
| 0215033    | Jelcz-Laskowice (3)  | 13,4                                                       | 14,2 | 15,7 | 17,5 | 23,8 | 32,0 | 44,1 | 55,1 | 56,3 | 65,5 | 64,9 | 48,3 | 48,0 | 31,1 | 36,8 | 30,5 |
| 0215042    | Oława (2)            | 9,6                                                        | 22,0 | 14,5 | 13,2 | 21,0 | 14,3 | 15,2 | 17,5 | 25,1 | 24,5 | 17,7 | 19,3 | 30,2 | 23,8 | 19,5 | 26,8 |
| 0217012    | Borów (2)            | 3,6                                                        | 9,5  | 4,6  | 9,7  | 12,0 | 9,1  | 8,9  | 7,1  | 8,0  | 10,4 | 8,7  | 17,5 | 25,9 | 27,3 | 23,4 | 23,4 |
| 0218012    | Kostomłoty (2)       | 15,9                                                       | 5,3  | 2,0  | 6,3  | -0,8 | 7,2  | 2,7  | 13,1 | 14,7 | 18,9 | 15,7 | 20,7 | 31,2 | 20,0 | 21,4 | 25,6 |
| 0218032    | Miękinia (2)         | 4,8                                                        | 6,9  | 2,0  | 4,6  | 6,9  | 6,3  | 8,2  | 6,6  | 3,8  | 2,8  | 6,9  | 8,3  | -2,2 | 1,5  | -0,2 | 4,3  |
| 0218043    | Środa Śląska (3)     | 3,9                                                        | 11,7 | 6,7  | 2,5  | 4,7  | 4,3  | 4,0  | 7,4  | 5,4  | 4,6  | 3,3  | 2,7  | 3,3  | -1,0 | -0,3 | 4,5  |
| 0220013    | Oborniki Śląskie (3) | 2,8                                                        | -0,1 | 2,6  | 4,4  | 8,0  | 4,0  | 7,6  | 9,6  | 4,9  | 8,1  | 11,4 | 11,6 | 13,2 | 9,2  | 7,4  | 11,5 |
| 0220023    | Prusice (3) *        | -8,2                                                       | -3,1 | -8,3 | -1,6 | -0,8 | 0,5  | -2,5 | -1,7 | 1,0  | -0,2 | 0,5  | -1,5 | -0,8 | 1,7  | -1,2 | -1,5 |
| 0220033    | Trzebnica (3)        | 4,4                                                        | 4,2  | 4,1  | 8,6  | 4,9  | 10,0 | 7,0  | 17,2 | 24,7 | 16,8 | 21,7 | 21,1 | 38,9 | 16,8 | 19,9 | 19,2 |
| 0220042    | Wisznia Mała (2)     | -2,5                                                       | -4,1 | 5,5  | -4,3 | 1,0  | -2,6 | -2,6 | -3,6 | -7,4 | -6,3 | 3,2  | 6,9  | 1,8  | 0,6  | 1,0  | 2,4  |
| 0220052    | Zawonia (2)          | -3,7                                                       | -3,0 | -1,9 | -3,0 | -6,1 | -0,9 | -4,3 | -3,7 | 0,3  | -3,9 | 3,9  | -1,5 | -3,1 | -0,8 | -2,1 | -2,3 |
| 0222013    | Brzeg Dolny (3)      | -2,7                                                       | -4,8 | -8,4 | 0,3  | -8,8 | -1,7 | -5,0 | -0,7 | -8,4 | 1,6  | -3,4 | -8,8 | 1,6  | -3,3 | -2,0 | -4,7 |
| 0223012    | Czernica (2)         | -0,8                                                       | 1,9  | -0,6 | 1,9  | 0,0  | 2,0  | 5,4  | 1,5  | 9,7  | 8,4  | 9,2  | 8,6  | 22,6 | 11,0 | 11,5 | 11,9 |
| 0223022    | Długoleka (2)        | -6,7                                                       | -1,6 | -5,7 | -3,8 | -1,2 | -0,4 | -2,4 | -2,4 | -1,2 | -3,2 | -0,8 | 2,6  | 4,3  | 2,2  | 5,0  | 1,4  |
| 0223032    | Jordanów Śląski (2)  | -3,1                                                       | -6,3 | -3,3 | -3,3 | 0,3  | -4,4 | -0,4 | -4,0 | -0,9 | 0,3  | 0,0  | -0,1 | 3,2  | 7,3  | 3,1  | 2,2  |
| 0223043    | Kąty Wrocławskie (3) | 3,5                                                        | 4,6  | 2,0  | 1,8  | 2,9  | 6,0  | 8,3  | -2,1 | 3,4  | 5,6  | 1,6  | 1,4  | 4,2  | 2,6  | 8,4  | -0,9 |
| 0223052    | Kobierzyce (2)       | 5,3                                                        | 5,9  | 2,8  | 3,0  | 5,3  | 3,2  | 3,9  | 3,6  | 7,1  | 5,0  | 6,6  | 7,4  | 4,1  | 4,3  | 7,1  | 5,3  |
| 0223062    | Mietków (2)          | -0,4                                                       | 0,2  | 1,7  | -5,0 | -2,8 | -5,2 | -2,1 | -0,5 | -3,5 | -0,7 | 1,0  | -2,9 | -4,4 | -1,9 | 1,0  | -2,5 |
| 0223073    | Sobótka (3)          | 1,3                                                        | 1,9  | -2,2 | 4,3  | 7,7  | 9,1  | 12,5 | 11,2 | 10,9 | 10,1 | 12,7 | 12,8 | 14,5 | 10,4 | 12,9 | 10,0 |
| 0223083    | Siechnice (3) *      | -2,0                                                       | 2,8  | -0,2 | -2,2 | 4,4  | 0,8  | 3,7  | 0,8  | 1,6  | 3,7  | -0,4 | 3,3  | 5,6  | 2,1  | 0,8  | 3,9  |
| 0223092    | Żórawina (2)         | -1,2                                                       | 3,7  | -0,7 | 0,7  | -2,4 | 2,3  | 1,1  | -1,0 | -0,1 | 5,9  | 1,7  | 0,0  | 6,4  | 0,7  | 4,6  | 4,8  |
| 0264011    | Wrocław (1)          | -2,7                                                       | 5,2  | -2,2 | 2,8  | -2,0 | 3,0  | 4,2  | -2,8 | 5,0  | 0,8  | -6,3 | -2,1 | -0,3 | 1,0  | -4,8 | -2,2 |
| 0608011    | Lubartów (1)         | 9,2                                                        | 7,2  | 4,1  | 16,7 | 12,6 | 15,5 | 13,4 | 24,0 | 16,8 | 22,1 | 13,4 | 17,3 | 15,2 | 16,1 | 15,5 | 15,1 |
| 0608072    | Lubartów (2)         | -0,1                                                       | 1,7  | 5,5  | 0,3  | 0,9  | 1,6  | 2,8  | 2,6  | 1,4  | 4,5  | 5,0  | 7,8  | 6,8  | 5,9  | 5,5  | 4,8  |
| 0609013    | Bełżyce (3)          | 4,7                                                        | 3,8  | 4,4  | 0,5  | -0,8 | 2,1  | -3,2 | 1,3  | 3,7  | 4,1  | 4,2  | 5,1  | 4,3  | 5,1  | 0,4  | -0,3 |
| 0609033    | Bychawa (3)          | -2,0                                                       | -1,0 | -4,6 | -2,9 | -1,6 | -3,8 | -1,4 | -6,3 | -2,2 | -4,4 | 1,4  | -2,4 | 1,4  | -0,4 | -1,9 | -1,8 |
| 0609042    | Garbów (2)           | 3,4                                                        | -1,9 | 0,6  | 4,6  | 4,5  | 2,2  | 3,9  | 1,1  | 2,5  | 1,4  | -5,0 | -1,8 | -0,1 | -0,6 | 0,1  | 4,7  |
| 0609052    | Głusk (2)            | 6,2                                                        | 5,0  | 2,5  | 3,1  | 15,1 | 8,1  | 11,9 | 8,7  | 13,7 | 16,3 | 17,6 | 19,5 | 19,7 | 18,3 | 26,3 | 35,4 |
| 0609062    | Jabłonna (2)         | 8,5                                                        | 6,1  | 7,5  | 10,3 | 9,0  | 4,4  | 4,3  | 6,8  | 10,5 | 8,8  | 10,6 | 16,2 | 17,4 | 22,2 | 13,2 | 18,4 |
| 0609072    | Jastków (2)          | 13,9                                                       | 8,6  | 14,4 | 22,2 | 32,9 | 19,8 | 26,1 | 23,5 | 26,2 | 14,5 | 20,6 | 24,1 | 33,1 | 23,3 | 23,2 | 19,2 |
| 0609082    | Konopnica (2)        | 3,0                                                        | 5,2  | 21,3 | 20,8 | 15,4 | 41,9 | 27,1 | 19,8 | 13,9 | 26,6 | 23,1 | 24,2 | 24,5 | 26,9 | 29,6 | 26,8 |

|         |                       |      |      |      |      |      |      |      |      |      |      |      |      |      |      |      |      |
|---------|-----------------------|------|------|------|------|------|------|------|------|------|------|------|------|------|------|------|------|
| 0609102 | Niedrzwica Duża (2)   | 10,4 | 8,7  | 4,2  | 9,0  | 12,5 | 12,3 | 8,6  | 9,0  | 10,5 | 1,5  | 2,7  | 2,5  | 5,7  | 0,9  | 0,6  | 2,1  |
| 0609112 | Niemce (2)            | -0,8 | 2,0  | 4,3  | -3,3 | 7,3  | 0,5  | 4,8  | -0,1 | 0,6  | 5,6  | 2,8  | 9,8  | 5,3  | 7,5  | 17,6 | 21,3 |
| 0609122 | Strzyżewice (2)       | 0,0  | 1,9  | 7,1  | 0,5  | 5,0  | 7,4  | 4,3  | -7,6 | 20,5 | 13,1 | 9,4  | 9,2  | 7,1  | 6,9  | 8,5  | 9,8  |
| 0609132 | Wojciechów (2)        | -1,0 | -8,7 | -6,4 | -5,9 | 5,4  | -3,9 | 0,3  | 1,7  | 6,7  | 1,8  | 0,9  | 4,6  | 2,0  | 1,2  | 4,9  | -1,3 |
| 0609142 | Wólka (2)             | -0,4 | 3,8  | 3,2  | 9,1  | 6,6  | 5,9  | 3,8  | 9,9  | 11,4 | 8,7  | 12,3 | 15,3 | 41,6 | 18,2 | 19,9 | 25,9 |
| 0610033 | Łączna (3)            | 1,9  | 2,7  | 4,2  | 2,5  | 1,3  | 1,0  | 3,2  | -5,2 | 0,7  | 3,7  | 7,1  | 4,2  | 4,4  | 2,1  | 1,5  | 3,2  |
| 0610062 | Spiczyn (2)           | -1,3 | 1,0  | 2,1  | 2,0  | 0,0  | 1,1  | -0,2 | 1,3  | 0,4  | 1,3  | 1,4  | 2,2  | 3,2  | -0,7 | 2,2  | 2,3  |
| 0614083 | Nałęczów (3)          | 30,4 | 12,6 | 6,5  | 10,0 | 6,0  | 5,2  | 6,7  | 5,9  | 7,3  | 5,6  | 11,5 | 8,7  | 4,5  | 4,1  | 12,3 | 4,5  |
| 0617011 | Świdnik (1)           | 19,0 | 15,7 | 0,5  | 7,6  | 3,5  | 16,1 | -7,5 | 15,1 | 3,4  | 1,8  | -2,4 | 13,9 | 7,3  | 3,7  | 4,9  | 8,1  |
| 0617022 | Mełgiew (2)           | -6,8 | -4,5 | -1,8 | -5,8 | 3,9  | 6,4  | 1,5  | -2,3 | 5,0  | 17,5 | 3,1  | 3,3  | 8,6  | 2,6  | -3,1 | 7,7  |
| 0617033 | Piaski (3)            | -0,8 | 3,5  | 6,8  | 8,4  | 11,6 | 8,5  | 10,2 | 15,0 | 14,2 | 17,5 | 16,0 | 17,9 | 20,5 | 12,0 | 13,9 | 15,2 |
| 0663011 | Lublin (1)            | 4,3  | 2,7  | 5,0  | 14,8 | 18,7 | 7,4  | 8,5  | 10,3 | 8,1  | 19,9 | 13,4 | 19,1 | 14,9 | 18,1 | 11,9 | 15,3 |
| 1201011 | Bochnia (1)           | -0,6 | 5,6  | 3,9  | 7,8  | 7,7  | 16,3 | 11,0 | 16,2 | 22,9 | 17,3 | 20,1 | 21,4 | 24,9 | 22,8 | 32,6 | 32,1 |
| 1201022 | Bochnia (2)           | -0,5 | -1,4 | 0,6  | 0,1  | 2,6  | 1,0  | 1,2  | 6,1  | 1,9  | 7,0  | 6,5  | 7,6  | 4,0  | 3,4  | 5,2  | 5,4  |
| 1201032 | Drwinia (2)           | 1,0  | 3,0  | -2,6 | 4,4  | 4,3  | 1,8  | 7,3  | 7,1  | 5,2  | 1,9  | 3,3  | 6,9  | 11,6 | 3,8  | 3,6  | 4,8  |
| 1201052 | Łapanów (2)           | -0,2 | -2,7 | 2,5  | -0,2 | 7,9  | -3,3 | -2,9 | 1,7  | 4,6  | 5,2  | 6,1  | 5,0  | 2,2  | 5,2  | 5,0  | 2,8  |
| 1201063 | Nowy Wiśnicz (3)      | 12,6 | 6,9  | 6,3  | 10,7 | 6,5  | 4,5  | 7,8  | 7,0  | 7,0  | 8,7  | 7,9  | 8,8  | 10,6 | 8,7  | 9,5  | 7,4  |
| 1201072 | Rzezawa (2)           | 10,3 | 12,5 | 15,8 | 15,7 | 17,2 | 12,2 | 4,1  | 13,5 | 15,4 | 8,4  | 9,5  | 9,8  | 7,3  | 9,9  | 5,9  | 7,1  |
| 1201082 | Trzciana (2)          | 11,7 | 15,6 | 23,7 | 28,1 | 19,1 | 30,9 | 34,5 | 46,3 | 41,0 | 37,9 | 28,4 | 43,3 | 35,6 | 34,8 | 36,1 | 39,7 |
| 1201092 | Żegocina (2)          | 9,8  | 10,9 | 24,9 | 23,9 | 21,2 | 24,7 | 28,5 | 36,0 | 32,6 | 26,3 | 28,7 | 30,9 | 32,2 | 21,1 | 18,7 | 20,5 |
| 1206012 | Czernichów (2)        | 5,9  | 5,0  | 12,4 | 7,7  | 11,0 | 10,2 | 8,0  | 11,9 | 29,7 | 24,2 | 14,7 | 23,3 | 27,6 | 15,4 | 21,2 | 24,9 |
| 1206022 | Igołomia-Wawrzeńcz    | -2,4 | 0,5  | -1,2 | 1,8  | 3,4  | -0,1 | 4,1  | -0,6 | 4,6  | 12,8 | 7,7  | 3,4  | 6,0  | 2,3  | 1,6  | 5,6  |
| 1206032 | Iwanowice (2)         | -0,2 | -1,0 | 1,3  | 3,0  | 9,0  | 3,8  | 2,3  | -0,9 | -5,2 | -3,3 | -2,4 | -0,8 | -4,6 | -6,5 | -4,2 | -5,1 |
| 1206042 | Jerzmanowice-Przeg    | 1,0  | 3,6  | 5,1  | 1,6  | 2,1  | 4,4  | 4,5  | 2,9  | 2,8  | 3,5  | 4,2  | 3,0  | 1,6  | 3,8  | 6,1  | 4,8  |
| 1206052 | Kocmyrzów-Luborzyd    | 6,5  | 7,5  | 11,1 | 8,4  | 16,6 | 8,4  | 9,7  | 9,9  | 14,9 | 11,9 | 13,5 | 13,6 | 9,9  | 16,4 | 24,6 | 19,2 |
| 1206063 | Krzeszowice (3)       | 25,4 | 22,2 | 23,4 | 23,2 | 28,5 | 22,9 | 19,0 | 21,0 | 28,7 | 24,9 | 19,9 | 24,3 | 19,6 | 15,2 | 8,6  | 14,9 |
| 1206072 | Liszki (2)            | 32,1 | 23,7 | 17,9 | 21,9 | 25,8 | 27,8 | 20,4 | 26,8 | 25,1 | 29,2 | 22,4 | 16,4 | 28,2 | 23,3 | 28,8 | 23,8 |
| 1206082 | Michałowice (2)       | 7,9  | 8,5  | 8,9  | 13,0 | 9,4  | 5,3  | 8,6  | 4,8  | 4,4  | 3,6  | 7,3  | 4,5  | 2,0  | 5,6  | 5,5  | 4,0  |
| 1206092 | Mogilany (2)          | 0,4  | 4,0  | -1,7 | -2,0 | -2,1 | -1,7 | -0,3 | -1,1 | -1,6 | -2,0 | -3,2 | -5,6 | -2,8 | -2,8 | -6,3 | -2,9 |
| 1206103 | Skała (3)             | -8,8 | 2,9  | 2,6  | -4,7 | -3,6 | -4,7 | 2,6  | -3,3 | 1,2  | 0,5  | 3,3  | 6,8  | 7,0  | 0,5  | -3,2 | 1,2  |
| 1206113 | Skawina (3)           | 2,2  | 1,5  | -2,9 | -0,5 | -0,3 | 6,4  | 3,9  | 5,0  | 3,4  | 6,9  | 4,7  | 8,0  | 5,5  | 10,7 | 9,9  | 4,9  |
| 1206123 | Słomniki (3)          | -3,0 | -1,1 | 3,0  | 4,4  | 0,1  | 6,2  | 6,4  | 12,5 | 8,8  | 11,4 | 10,5 | 17,9 | 20,2 | 11,8 | 18,3 | 13,4 |
| 1206132 | Sułoszowa (2)         | 2,5  | -3,7 | 2,6  | 3,3  | 6,3  | 3,6  | 4,8  | 1,9  | 6,4  | 2,6  | 2,9  | 1,1  | 5,6  | 4,5  | 6,9  | 3,5  |
| 1206143 | Świątniki Górne (3) * | 1,2  | 0,8  | 1,3  | 5,7  | 2,1  | 4,2  | 6,5  | 6,2  | 4,8  | 3,0  | 5,2  | 5,4  | 7,7  | 6,7  | 4,6  | 6,4  |
| 1206152 | Wielka Wieś (2)       | 10,6 | 36,3 | 22,2 | 30,2 | 25,1 | 15,3 | 16,8 | 18,6 | 16,0 | 16,9 | 10,0 | 15,3 | 7,5  | 7,2  | 10,8 | 12,4 |
| 1206162 | Zabierzów (2)         | 3,2  | -2,1 | -1,1 | 1,8  | 5,2  | 7,4  | 6,3  | 4,3  | 9,0  | 13,6 | 9,5  | 4,4  | -4,9 | 2,5  | 6,9  | 13,2 |
| 1206172 | Zielonki (2)          | -2,8 | 6,7  | 2,3  | 0,4  | 9,4  | 2,0  | 4,9  | 12,8 | 22,5 | 22,7 | 18,4 | 15,6 | 9,3  | 9,2  | 6,4  | 10,6 |
| 1208022 | Gołcza (2)            | 19,4 | 19,0 | 24,3 | 24,8 | 23,5 | 21,6 | 21,7 | 22,9 | 31,0 | 30,0 | 25,2 | 18,0 | 22,4 | 14,5 | 14,0 | 17,8 |

|         |                       |      |      |      |      |      |      |      |      |      |      |      |      |      |      |      |      |
|---------|-----------------------|------|------|------|------|------|------|------|------|------|------|------|------|------|------|------|------|
| 1209013 | Dobczyce (3)          | 1,2  | 1,3  | 3,3  | 3,3  | 3,5  | 3,5  | 4,2  | 5,3  | 6,2  | 2,9  | 2,5  | 6,5  | 7,1  | 2,6  | 10,9 | 13,4 |
| 1209022 | Lubień (2)            | 12,3 | 16,0 | 17,3 | 23,9 | 26,0 | 24,6 | 17,5 | 23,6 | 23,5 | 27,1 | 28,7 | 22,3 | 30,3 | 21,0 | 17,4 | 13,7 |
| 1209033 | Myślenice (3)         | 0,9  | 1,4  | 2,5  | 3,9  | 2,0  | 1,2  | 0,7  | -2,5 | 0,4  | -2,8 | -1,2 | -1,6 | 0,5  | -0,7 | -0,4 | 0,8  |
| 1209042 | Pcim (2)              | -0,2 | -2,4 | -2,2 | -0,7 | -0,4 | 0,7  | 3,2  | 2,2  | -1,1 | 1,0  | 1,2  | 2,1  | 3,6  | 2,1  | 3,4  | -2,0 |
| 1209052 | Raciechowice (2)      | -4,0 | -0,2 | 0,7  | -2,1 | 0,0  | 10,0 | 3,2  | 2,2  | 0,5  | 3,0  | 3,8  | 8,4  | 9,2  | 1,9  | 3,3  | 5,3  |
| 1209062 | Siepraw (2)           | 1,3  | 4,7  | 2,2  | 6,6  | 2,6  | 11,9 | 7,1  | 14,1 | 10,9 | 27,9 | 19,1 | 20,6 | 26,8 | 23,4 | 21,0 | 16,7 |
| 1209073 | Sułkowice (3)         | -3,0 | -0,6 | 3,3  | 1,6  | -1,6 | 3,1  | -0,1 | 5,5  | 2,9  | 4,1  | 0,6  | 6,5  | 10,1 | 3,0  | 1,9  | 8,0  |
| 1209082 | Tokarnia (2)          | 1,0  | 1,3  | 0,1  | -0,4 | -0,8 | -3,2 | -1,0 | -1,3 | -1,4 | -1,0 | -1,2 | -3,3 | -3,1 | -0,8 | -1,3 | -1,8 |
| 1209092 | Wiśniowa (2)          | 2,2  | 0,6  | 3,3  | -0,8 | 1,9  | 2,9  | 1,9  | 4,1  | 4,0  | 1,0  | 4,0  | 5,1  | 2,2  | 3,0  | 2,1  | -0,2 |
| 1212062 | Trzyciąż (2)          | -3,1 | -6,2 | 1,6  | -0,6 | 3,2  | 1,8  | 0,5  | 1,8  | 2,5  | -2,1 | 4,0  | 6,3  | 0,9  | -0,9 | 3,5  | 2,0  |
| 1214012 | Koniusza (2)          | -3,5 | -6,9 | -2,0 | -1,5 | 1,7  | -0,8 | -0,1 | 2,3  | 2,6  | 0,5  | 4,7  | 10,0 | 5,8  | 0,8  | -0,4 | 6,9  |
| 1214022 | Koszyce (2)           | 1,6  | 0,6  | -4,1 | 3,5  | 0,8  | 0,8  | 1,0  | 4,6  | 2,1  | 4,0  | 0,4  | -0,2 | 6,2  | 3,2  | 0,8  | 2,3  |
| 1214032 | Nowe Brzesko (2) *    | -2,2 | -3,7 | 1,0  | 0,6  | 1,4  | 1,8  | 1,9  | -1,9 | 2,9  | 0,1  | -1,6 | 0,3  | 2,3  | 2,5  | 2,1  | 3,9  |
| 1214053 | Proszowice (3)        | 1,5  | 0,0  | -1,4 | 2,2  | -0,8 | 1,8  | -3,6 | 2,6  | 1,2  | 1,6  | -2,0 | -0,4 | -2,8 | -0,8 | 3,5  | -3,3 |
| 1218022 | Brzeźnica (2)         | -4,7 | -4,1 | -3,3 | 2,7  | 3,5  | 8,2  | -2,3 | -0,8 | -3,7 | 4,1  | 1,4  | -2,4 | -1,2 | 4,4  | 0,2  | 0,0  |
| 1218033 | Kalwaria Zebrzydowska | 1,2  | 1,4  | 3,6  | 0,9  | 4,8  | 8,2  | 3,6  | 5,7  | 3,7  | -0,8 | 3,0  | 7,4  | 9,5  | 8,2  | 9,7  | 12,2 |
| 1218042 | Lanckorona (2)        | 0,9  | -3,0 | 4,6  | 1,6  | 6,9  | 2,1  | -1,6 | -4,6 | -0,7 | 0,3  | -0,1 | 2,7  | -0,8 | 3,0  | 1,3  | 1,8  |
| 1218072 | Stryków (2)           | 0,6  | 1,8  | -0,3 | -0,4 | 0,5  | 5,0  | 3,4  | 5,6  | 7,5  | 6,2  | 5,6  | 9,3  | 13,3 | 7,3  | 9,7  | 3,9  |
| 1218093 | Wadowice (3)          | -1,4 | -3,1 | 0,5  | -0,8 | 0,8  | 1,9  | 1,5  | -0,1 | 1,0  | 2,5  | 3,5  | 3,3  | 4,0  | 2,3  | 7,2  | 0,0  |
| 1219012 | Biskupice (2)         | 1,1  | 4,5  | 8,1  | 5,5  | 6,6  | 4,9  | 6,0  | 4,3  | 10,2 | 10,1 | 7,2  | 8,0  | 11,4 | 9,4  | 14,2 | 16,1 |
| 1219022 | Gdów (2)              | 0,2  | 0,8  | 4,0  | 2,4  | 4,5  | -0,4 | 1,8  | 0,8  | 2,1  | 0,9  | 1,6  | 3,3  | 5,3  | 4,3  | 2,9  | 2,5  |
| 1219032 | Kłaj (2)              | 3,2  | 2,0  | 4,1  | 2,3  | 3,9  | 3,0  | 3,3  | 2,5  | 7,4  | 10,1 | 5,7  | 5,2  | 6,3  | 6,1  | 2,7  | 4,4  |
| 1219043 | Niepołomice (3)       | 11,8 | 9,1  | 6,0  | 5,4  | 9,9  | 13,5 | 11,0 | 11,0 | 22,1 | 16,1 | 18,8 | 20,2 | 26,7 | 14,1 | 25,9 | 23,0 |
| 1219053 | Wieliczka (3)         | 4,3  | 5,9  | 3,5  | 7,8  | 10,5 | 7,7  | 7,0  | 8,8  | 19,4 | 18,1 | 20,5 | 21,4 | 14,4 | 8,5  | 14,3 | 19,2 |
| 1261011 | Kraków (1)            | 2,4  | 2,4  | 3,9  | 5,0  | 4,1  | 2,0  | 4,0  | 5,0  | 5,2  | 6,5  | 7,0  | 7,6  | 2,8  | 6,8  | 8,6  | 10,3 |
| 1405011 | Milanówek (1)         | 0,5  | 3,2  | 0,2  | 1,2  | -0,5 | -0,8 | -1,5 | -0,5 | 0,9  | 0,7  | 0,1  | -1,1 | -0,3 | 1,0  | 3,9  | 1,8  |
| 1405021 | Podkowa Leśna (1)     | 1,5  | 2,0  | 0,2  | -1,1 | 0,1  | 2,1  | -2,9 | 1,0  | 4,0  | -0,4 | 2,7  | 2,4  | 1,9  | 1,8  | 1,0  | 3,6  |
| 1405032 | Baranów (2)           | -1,0 | -1,2 | -2,3 | -4,7 | -2,0 | -0,8 | -2,9 | -2,4 | 0,3  | -4,9 | -0,3 | -2,6 | -2,2 | -0,2 | -1,0 | -2,0 |
| 1405043 | Grodzisk Mazowiecki   | 0,4  | 3,8  | 4,7  | 4,4  | 1,1  | 4,9  | -0,7 | -4,5 | 4,9  | 6,7  | 1,5  | 8,6  | 7,6  | 5,9  | 3,0  | 10,0 |
| 1405052 | Jaktorów (2)          | 3,9  | 6,3  | 7,9  | 10,7 | 8,2  | 7,1  | 6,8  | 16,3 | 10,6 | 15,7 | 11,5 | 9,3  | 23,6 | 14,8 | 20,0 | 18,6 |
| 1405062 | Żabia Wola (2)        | 9,3  | 5,3  | 9,8  | 8,7  | 9,6  | 11,6 | 8,9  | 14,7 | 14,2 | 13,1 | 11,7 | 13,2 | 13,3 | 11,7 | 13,5 | 15,6 |
| 1406032 | Chynów (2)            | 12,8 | 15,6 | 17,9 | 20,1 | 20,2 | 18,3 | 16,5 | 22,5 | 27,6 | 23,4 | 17,7 | 16,6 | 21,4 | 33,8 | 35,6 | 32,9 |
| 1406053 | Grójec (3)            | -2,6 | -4,5 | 1,3  | -6,0 | -6,1 | 2,3  | -4,1 | -2,8 | 1,1  | -3,4 | 1,9  | 0,5  | 0,2  | -1,8 | -1,3 | 4,0  |
| 1406092 | Pniewy (2)            | 8,2  | 2,8  | 10,2 | 2,5  | 3,7  | 4,7  | 3,6  | 1,3  | 3,4  | 6,2  | 4,0  | 2,4  | 7,8  | 2,1  | 1,9  | 2,2  |
| 1408011 | Legionowo (1)         | 1,1  | 0,7  | -2,1 | -0,8 | 1,4  | 3,8  | 1,5  | 0,7  | 4,4  | 3,9  | 2,0  | 4,8  | 6,1  | 6,6  | 4,0  | 3,3  |
| 1408022 | Jabłonna (2)          | 1,5  | 0,8  | 0,8  | 3,2  | 2,8  | 2,0  | 2,6  | 3,2  | 3,1  | 2,5  | 3,3  | 4,3  | 5,4  | 3,6  | 4,4  | 3,3  |
| 1408032 | Nieporęt (2)          | -0,6 | 0,3  | 0,1  | -0,2 | -0,5 | 1,2  | 0,0  | 1,2  | -0,6 | 3,6  | 0,0  | 3,3  | 0,9  | 3,2  | 2,9  | 3,6  |
| 1408043 | Serock (3)            | 3,9  | -3,5 | -3,5 | -0,7 | -3,5 | -3,2 | -4,0 | -0,3 | -1,2 | -1,8 | -1,8 | -0,2 | -1,0 | 1,8  | -1,8 | 3,2  |

|         |                      |      |      |       |      |      |      |      |      |      |      |      |      |       |       |      |       |
|---------|----------------------|------|------|-------|------|------|------|------|------|------|------|------|------|-------|-------|------|-------|
| 1408052 | Wieliszew (2) *      | 4,3  | 0,7  | 0,1   | 5,2  | 4,7  | 6,8  | 1,9  | -4,5 | 7,7  | 4,7  | 6,6  | 4,4  | 5,7   | 2,3   | 3,9  | 7,1   |
| 1412011 | Mińsk Mazowiecki (1) | -0,6 | 2,9  | 4,6   | 0,2  | 2,9  | 2,3  | 2,1  | 1,2  | 5,7  | 3,5  | 1,9  | 2,8  | 2,3   | 2,6   | -0,1 | 5,0   |
| 1412042 | Ceglów (2)           | -1,2 | 2,1  | 1,0   | -3,2 | -0,4 | 0,5  | 2,8  | 0,4  | 0,6  | 0,6  | -2,5 | 0,6  | -0,5  | -0,6  | 0,5  | -1,5  |
| 1412052 | Dębe Wielkie (2)     | 0,9  | 0,2  | 2,5   | 1,7  | 1,7  | -4,1 | -0,5 | 1,1  | 0,5  | 1,2  | 0,9  | -1,5 | 3,8   | 0,3   | -0,6 | 2,4   |
| 1412062 | Dobre (2)            | -0,3 | -6,3 | -0,4  | 4,0  | -1,9 | 2,0  | 1,5  | 2,9  | 5,6  | 1,9  | 4,0  | 2,7  | 5,6   | 3,5   | 3,1  | 3,3   |
| 1412073 | Halinów (3) *        | -6,0 | -2,6 | -2,8  | -2,1 | 3,1  | 5,7  | 5,7  | -4,5 | 2,4  | -1,6 | -2,6 | -0,4 | 0,9   | 2,1   | -4,7 | 1,2   |
| 1412082 | Jakubów (2)          | 4,3  | -0,7 | -3,1  | -1,0 | -2,8 | 5,7  | -2,3 | -2,6 | -0,9 | 4,5  | 3,4  | 2,4  | -0,7  | -0,2  | 6,8  | 1,6   |
| 1412093 | Kałużyn (3)          | 1,3  | 2,7  | -1,4  | -2,9 | 0,4  | -3,4 | -2,7 | -0,8 | -1,5 | -3,1 | -0,4 | 0,5  | -2,0  | 0,1   | 1,2  | 0,8   |
| 1412102 | Łatowicz (2)         | 3,8  | 4,7  | 2,1   | 3,0  | 3,6  | 6,9  | 3,7  | 5,6  | 4,1  | 4,9  | -1,2 | 7,6  | 7,9   | 3,6   | 12,1 | 10,2  |
| 1412112 | Mińsk Mazowiecki (2) | 0,9  | 2,1  | 2,5   | 1,2  | 1,0  | 3,0  | 3,5  | 4,7  | 7,4  | 4,5  | 6,4  | 6,3  | 5,3   | 0,8   | 4,1  | 5,1   |
| 1412122 | Mrozy (2)            | -0,6 | 5,5  | 1,0   | 6,6  | 3,0  | 0,1  | 4,9  | 4,1  | 5,6  | 3,1  | 3,6  | 6,0  | 3,1   | 4,6   | 4,1  | 10,4  |
| 1412132 | Siennica (2)         | 8,3  | 1,7  | 7,6   | 7,2  | 7,2  | 8,8  | 7,1  | 8,3  | 8,7  | 8,0  | 9,6  | 10,9 | 17,5  | 12,4  | 15,3 | 15,8  |
| 1412142 | Stanisławów (2)      | 2,1  | 3,1  | 2,6   | 2,6  | 6,8  | 7,0  | 7,7  | 8,5  | 15,3 | 14,5 | 14,4 | 11,2 | 13,7  | 13,9  | 15,4 | 13,6  |
| 1412151 | Sulejówek (1) *      | 0,9  | 2,1  | 0,3   | 0,6  | 0,8  | 1,5  | 2,6  | 2,1  | 1,2  | 1,4  | 1,5  | 1,1  | 0,4   | -0,3  | 0,2  | 0,1   |
| 1414011 | Nowy Dwór Mazowiecki | -8,2 | -2,7 | -1,5  | 1,8  | -3,0 | -5,8 | -3,8 | 2,4  | -4,5 | 2,7  | 0,4  | 0,1  | -1,0  | -1,0  | -0,1 | 3,4   |
| 1414022 | Czosnów (2)          | -0,7 | -2,5 | 0,7   | 4,0  | 8,1  | 4,2  | 3,4  | 3,7  | 1,7  | 3,1  | 4,9  | 6,0  | 2,9   | 2,8   | 1,6  | 5,2   |
| 1414032 | Leoncin (2)          | 3,3  | 1,7  | 2,4   | 1,2  | 3,2  | -0,6 | 1,5  | 0,5  | -0,1 | 0,5  | 0,3  | 2,3  | 5,2   | 0,2   | 2,0  | 2,0   |
| 1414052 | Pomiechówek (2)      | -5,5 | -2,9 | -0,2  | 4,6  | 2,9  | -2,3 | 4,2  | 3,0  | -2,4 | 8,6  | 2,6  | 3,8  | 0,2   | 0,5   | 0,5  | 4,8   |
| 1414063 | Zakroczym (3)        | 1,7  | 1,1  | -2,5  | -3,3 | -1,7 | 3,6  | 0,6  | 4,0  | 0,0  | -2,2 | 0,3  | -3,0 | -3,9  | -3,4  | 0,5  | -0,7  |
| 1417011 | Józefów (1)          | 0,4  | 0,8  | 0,4   | 0,0  | 1,4  | 0,4  | -0,7 | 1,6  | -0,3 | -0,6 | 1,7  | 0,3  | -1,2  | 1,4   | -0,9 | -1,3  |
| 1417021 | Otwock (1)           | 0,8  | 0,3  | 0,6   | -0,3 | -2,5 | -2,1 | -4,0 | -4,8 | -4,7 | -7,4 | -5,3 | -5,5 | -10,4 | -6,9  | -4,2 | -4,6  |
| 1417032 | Celestynów (2)       | -1,4 | 5,1  | 4,5   | 7,2  | 7,9  | 5,3  | 5,1  | 6,5  | 12,3 | 11,5 | 9,7  | 5,3  | 12,3  | 9,1   | 6,6  | 6,9   |
| 1417043 | Karczew (3)          | 1,6  | 1,3  | 0,1   | 0,3  | 0,2  | -1,2 | -0,1 | -0,4 | -0,7 | -0,4 | -2,4 | -1,4 | -2,0  | -2,2  | -1,7 | -4,5  |
| 1417052 | Kołbiel (2)          | -2,8 | -3,1 | -2,3  | -4,0 | -2,9 | -1,7 | -4,2 | 0,2  | -4,0 | -3,8 | -5,4 | -1,4 | -3,4  | -2,7  | -6,4 | -0,3  |
| 1417082 | Wiązowna (2)         | 3,9  | 2,4  | 3,5   | -2,8 | -0,9 | 2,1  | 0,7  | -3,7 | -5,1 | 2,2  | 1,2  | 5,2  | 0,1   | -2,0  | 2,3  | 3,2   |
| 1418013 | Góra Kalwaria (3)    | 4,8  | 5,3  | 17,8  | 9,4  | 13,7 | 14,4 | 15,4 | 23,4 | 17,6 | 30,6 | 38,0 | 39,1 | 26,5  | 16,7  | 34,0 | 32,0  |
| 1418023 | Konstancin-Jeziorna  | -3,5 | 7,0  | -14,0 | 15,8 | 9,1  | 4,5  | 1,9  | 7,1  | 3,5  | 6,0  | 2,1  | 3,3  | 9,3   | 7,0   | 3,7  | 9,6   |
| 1418032 | Lesznów (2)          | 4,5  | 6,3  | 11,2  | 8,1  | 10,2 | 10,4 | 12,5 | 11,8 | 16,7 | 19,0 | 15,8 | 12,6 | 20,5  | 7,1   | 9,0  | 12,8  |
| 1418043 | Piaseczno (3)        | 2,2  | 2,8  | 5,9   | 8,3  | 8,7  | 15,0 | 12,2 | 18,3 | 28,0 | 20,5 | 13,7 | 29,9 | 22,0  | 10,5  | 7,0  | 18,4  |
| 1418052 | Prażmów (2)          | -1,8 | 4,1  | 7,4   | 2,0  | 3,2  | 6,1  | 2,4  | 1,6  | 3,5  | 8,2  | 1,5  | 5,9  | 7,6   | 1,3   | 5,8  | 4,0   |
| 1418063 | Tarczyn (3) *        | 4,2  | 3,2  | 4,7   | 6,3  | 6,5  | 7,2  | 5,7  | 5,8  | 16,2 | 14,9 | 12,4 | 13,3 | 15,8  | 9,1   | 14,0 | 14,1  |
| 1421011 | Piastów (1)          | -0,3 | 3,0  | -0,8  | 4,3  | 1,4  | 2,5  | 1,9  | 3,4  | 3,1  | 4,7  | 6,8  | 0,9  | 4,3   | 7,4   | 3,2  | 6,0   |
| 1421021 | Pruszków (1)         | -2,7 | -7,8 | -1,5  | 0,2  | 3,2  | 0,3  | -1,0 | 3,8  | 6,7  | 1,9  | 5,6  | 3,9  | 5,4   | 2,9   | -0,8 | -4,9  |
| 1421033 | Brwinów (3)          | 1,4  | 9,3  | 6,2   | 9,4  | 8,5  | 28,7 | 34,0 | 25,3 | 32,5 | 39,1 | 30,1 | 30,3 | 39,3  | 20,2  | 17,0 | 17,7  |
| 1421042 | Michałowice (2)      | -1,5 | -0,4 | 10,4  | -2,1 | 0,5  | -2,1 | -4,0 | -6,1 | -6,1 | -4,7 | -7,6 | -9,8 | -11,8 | -11,1 | -8,3 | -12,2 |
| 1421052 | Nadarzyn (2)         | -8,4 | -1,1 | -0,5  | -3,6 | 2,9  | 3,4  | 0,2  | 0,6  | 2,7  | 12,4 | 9,0  | -2,4 | 3,6   | 4,0   | 0,2  | 11,0  |
| 1421062 | Raszyn (2)           | 0,8  | -0,7 | -0,6  | 0,0  | 1,7  | -0,3 | -2,1 | -2,9 | -2,9 | -3,3 | -1,4 | -0,1 | -1,8  | -3,2  | -4,3 | -2,0  |
| 1428011 | Sochaczew (1)        | 5,2  | 5,2  | 2,8   | 2,3  | 7,2  | 9,5  | 10,3 | 11,6 | 21,8 | 20,5 | 10,8 | 21,8 | 19,3  | 12,8  | 19,2 | 11,7  |

|         |                       |      |      |      |      |      |      |      |      |      |      |      |      |      |      |      |      |
|---------|-----------------------|------|------|------|------|------|------|------|------|------|------|------|------|------|------|------|------|
| 1428022 | Brochów (2) *         | -1,2 | 0,5  | -3,3 | 0,4  | 3,2  | -2,3 | -1,0 | 0,2  | -1,5 | 3,4  | 0,9  | 1,0  | 3,4  | 1,8  | 1,7  | 1,4  |
| 1428052 | Nowa Sucha (2)        | 3,9  | 2,1  | 2,5  | 1,3  | 1,0  | 0,3  | -0,1 | -0,5 | -2,5 | -3,4 | -2,4 | -3,5 | -3,9 | -2,3 | -2,2 | -3,6 |
| 1428072 | Sochaczew (2)         | 1,6  | -0,2 | 2,5  | -0,4 | 1,1  | -0,7 | -2,5 | -0,2 | -5,2 | 1,8  | -1,9 | -0,3 | -1,7 | -1,1 | -1,9 | -0,9 |
| 1428082 | Teresin (2)           | 0,0  | 0,4  | 1,1  | 2,2  | 0,3  | 1,3  | 0,9  | -0,5 | -1,0 | -1,0 | -1,2 | -2,1 | -5,9 | -1,6 | -4,4 | -3,1 |
| 1432013 | Błonie (3)            | -5,7 | -3,8 | -9,4 | -6,4 | -0,2 | -0,7 | -3,8 | -0,1 | -0,3 | -3,1 | -0,9 | 4,1  | 6,3  | -2,7 | 1,7  | -1,4 |
| 1432022 | Izabelin (2)          | -2,3 | 3,2  | 0,0  | 1,3  | -1,0 | 1,0  | 6,0  | 8,3  | 14,7 | 9,4  | 22,0 | 14,4 | 33,4 | 19,1 | 25,4 | 21,1 |
| 1432032 | Kampinos (2)          | 2,6  | -3,5 | -4,9 | -3,6 | -0,6 | -6,4 | -4,5 | -3,4 | -0,8 | -3,4 | -9,5 | -6,1 | -0,2 | 4,3  | -5,1 | 0,4  |
| 1432042 | Leszno (2)            | 0,4  | 2,0  | 0,2  | -4,5 | 4,5  | -3,8 | 2,0  | 3,7  | 6,4  | 13,0 | 3,0  | 6,5  | 14,1 | 13,0 | 9,0  | 15,3 |
| 1432053 | Łomianki (3)          | -1,4 | -5,2 | -2,0 | 8,1  | 5,8  | 3,6  | 0,3  | -0,6 | 3,7  | 5,5  | 0,9  | 4,1  | 6,8  | 7,4  | 8,2  | 3,8  |
| 1432063 | Ożarów Mazowiecki (2) | 1,2  | 3,5  | 0,8  | 1,8  | -1,5 | -1,3 | 0,3  | 2,3  | 1,4  | -0,4 | 0,2  | 0,7  | 3,0  | 1,8  | 1,4  | 1,0  |
| 1432072 | Stare Babice (2)      | -2,3 | 1,2  | -0,2 | 4,4  | -0,8 | -3,9 | -0,4 | 6,4  | -1,8 | 2,6  | -1,6 | 3,9  | -3,0 | -3,8 | -1,8 | 2,8  |
| 1434011 | Kobyłka (1)           | 4,7  | 1,7  | 1,7  | 4,3  | 1,8  | 0,8  | 1,4  | 2,7  | 0,1  | -0,3 | 1,3  | -0,4 | 2,7  | 2,5  | 2,2  | 0,2  |
| 1434021 | Marki (1)             | -1,8 | -5,0 | -4,5 | -0,5 | 1,7  | -0,9 | -1,8 | 0,3  | -0,8 | -2,8 | -0,2 | -2,7 | -1,5 | -2,7 | -1,4 | -0,3 |
| 1434031 | Ząbki (1)             | -3,2 | 1,9  | -1,7 | 0,0  | -1,2 | -2,0 | 2,5  | 0,4  | -3,9 | -1,9 | -1,2 | 1,2  | 1,9  | -1,9 | -1,3 | 1,6  |
| 1434041 | Zielonka (1)          | 3,2  | 2,8  | 4,2  | 1,6  | 0,4  | 2,7  | 3,9  | 1,8  | 4,2  | 5,6  | 4,7  | 5,4  | 2,6  | 2,9  | 1,8  | 1,9  |
| 1434052 | Dąbrówka (2)          | 6,3  | 3,1  | 1,0  | 1,7  | -2,0 | -0,1 | 2,0  | -1,0 | 1,4  | 0,1  | 1,1  | 2,8  | 3,6  | 3,9  | 0,6  | 1,4  |
| 1434072 | Klembów (2)           | 1,8  | -1,7 | 1,9  | 2,0  | 2,2  | 2,3  | -1,9 | -0,6 | -1,0 | 0,8  | -1,2 | 0,1  | -2,0 | -1,8 | -1,3 | 2,8  |
| 1434082 | Poświętne (2)         | 0,6  | 4,0  | -2,7 | -0,7 | 0,5  | 0,2  | 0,0  | 1,8  | -0,4 | 0,5  | 2,7  | 3,9  | 0,6  | 1,6  | 0,4  | 0,8  |
| 1434093 | Radzymin (3)          | 1,8  | -7,3 | 0,5  | -0,2 | 1,1  | 1,2  | 3,0  | -0,8 | 4,0  | 8,8  | 4,3  | 2,9  | 4,1  | 5,1  | 5,6  | 4,7  |
| 1434113 | Tłuszcz (3)           | 1,9  | -1,2 | -0,7 | -5,0 | -2,5 | -6,3 | 3,5  | 2,5  | 2,6  | 0,4  | 1,2  | -3,2 | 0,1  | -3,0 | 1,0  | -0,1 |
| 1434123 | Wołomin (3)           | 0,9  | -0,4 | 0,3  | 5,1  | 0,8  | 0,8  | 1,8  | 0,3  | -0,6 | 1,6  | 1,4  | 0,7  | 1,1  | 3,6  | 2,3  | 2,7  |
| 1435042 | Somianka (2)          | -0,8 | 0,6  | 1,4  | 0,1  | -0,5 | -0,2 | -3,2 | -2,3 | 0,3  | -3,2 | -2,1 | 3,6  | 1,9  | 0,1  | -1,1 | -1,1 |
| 1435053 | Wyszków (3)           | 2,0  | 9,3  | 14,0 | 23,2 | 20,7 | 23,9 | 31,3 | 22,4 | 22,2 | 18,4 | 15,4 | 17,4 | 21,7 | 14,0 | 11,7 | 12,1 |
| 1435062 | Zabrodzie (2)         | 2,6  | 7,8  | 10,1 | 3,8  | 6,8  | 11,6 | 9,8  | 10,3 | 13,0 | 13,3 | 9,5  | 11,6 | 9,7  | 9,7  | 3,4  | 7,6  |
| 1438011 | Żyrardów (1)          | -1,0 | 0,2  | 0,2  | 1,5  | -0,3 | 1,8  | 3,1  | 0,3  | 2,2  | 0,3  | 0,8  | 4,4  | 4,8  | -0,2 | 1,5  | -0,6 |
| 1438023 | Mszczonów (3)         | 15,6 | 10,5 | 10,4 | 9,4  | 12,6 | 18,0 | 11,7 | 11,0 | 17,1 | 12,4 | 16,4 | 11,4 | 19,7 | 12,5 | 10,7 | 8,8  |
| 1438032 | Puszcza Mariańska (2) | 9,2  | 8,2  | 17,1 | 22,6 | 23,2 | 21,0 | 20,6 | 36,9 | 41,8 | 64,1 | 58,6 | 56,8 | 58,4 | 46,0 | 48,1 | 44,8 |
| 1438042 | Radziejowice (2)      | 0,0  | 0,0  | 3,1  | 6,1  | 7,8  | 24,0 | 41,9 | 11,1 | 15,1 | 18,0 | 17,6 | 37,3 | 23,4 | 13,7 | 14,7 | 39,4 |
| 1438052 | Wiskitki (2)          | 9,6  | 11,4 | 3,4  | 7,0  | 8,6  | 15,7 | 28,7 | 32,3 | 25,3 | 29,4 | 45,3 | 47,3 | 67,6 | 55,9 | 60,4 | 50,5 |
| 1465011 | M.st.Warszawa (1) *   | -1,4 | -2,0 | -1,3 | -6,8 | -5,2 | 0,1  | -0,7 | 2,1  | 5,5  | -1,2 | 5,5  | 8,1  | 15,0 | 9,7  | 8,3  | 6,2  |
| 2204011 | Pruszcz Gdański (1)   | 4,0  | 5,3  | 4,2  | 4,1  | 8,0  | 12,7 | 13,5 | 24,4 | 25,9 | 27,8 | 35,1 | 39,2 | 41,8 | 24,6 | 24,9 | 20,2 |
| 2204022 | Cedry Wielkie (2)     | 3,9  | 3,9  | 5,3  | 6,6  | 6,3  | 5,8  | 8,3  | 12,1 | 15,7 | 10,7 | 11,2 | 11,2 | 15,7 | 13,7 | 15,8 | 9,8  |
| 2204032 | Kolbudy (2) *         | 4,4  | 0,1  | 0,6  | 3,7  | 3,2  | 5,1  | 3,0  | 3,6  | 5,4  | 4,6  | 5,1  | 2,9  | 10,8 | 2,9  | 1,2  | 2,4  |
| 2204042 | Pruszcz Gdański (2)   | 11,1 | 14,1 | 7,4  | 8,8  | 8,5  | 6,0  | 12,1 | 10,1 | 14,3 | 17,7 | 15,9 | 17,6 | 23,8 | 17,8 | 17,3 | 13,7 |
| 2204052 | Przywidz (2)          | 12,3 | 4,3  | 10,6 | 14,6 | 12,2 | 10,9 | 17,4 | 22,9 | 35,0 | 41,3 | 52,8 | 45,0 | 52,3 | 55,5 | 58,2 | 47,7 |
| 2204062 | Pszczółki (2)         | 3,4  | -0,2 | 9,1  | 6,0  | 4,8  | 4,1  | 4,5  | 3,2  | 6,4  | 8,9  | 3,8  | 11,1 | 10,5 | 6,7  | 6,8  | 6,9  |
| 2204072 | Suchy Dąb (2)         | 15,5 | 10,2 | 25,7 | 22,8 | 17,0 | 32,4 | 36,8 | 53,7 | 42,5 | 37,7 | 44,3 | 35,8 | 23,8 | 22,8 | 18,7 | 19,9 |
| 2204082 | Trąbki Wielkie (2)    | 11,7 | 8,9  | 8,0  | 10,0 | 8,0  | 8,5  | 12,7 | 13,7 | 11,2 | 21,4 | 17,6 | 15,4 | 11,3 | 11,8 | 9,1  | 10,3 |

|         |                    |      |      |      |      |      |      |       |       |       |      |      |       |      |      |      |      |
|---------|--------------------|------|------|------|------|------|------|-------|-------|-------|------|------|-------|------|------|------|------|
| 2205012 | Chmielno (2)       | -1,0 | 6,7  | 15,8 | -9,5 | 10,5 | 16,4 | 18,9  | 21,0  | 24,8  | 26,4 | 25,5 | 24,0  | 31,5 | 25,2 | 25,0 | 30,6 |
| 2205023 | Kartuzy (3)        | -2,2 | -0,9 | 1,4  | -2,7 | -1,5 | 1,9  | 1,5   | 1,5   | 4,6   | -0,7 | 4,1  | -0,6  | 2,3  | 6,6  | 3,2  | 7,7  |
| 2205032 | Przodkowo (2)      | 2,9  | -0,5 | 8,3  | 3,4  | -2,4 | 0,9  | 2,8   | 5,6   | 6,0   | 4,4  | 8,4  | 6,8   | 11,7 | 7,3  | 10,7 | 9,9  |
| 2205042 | Sierakowice (2)    | 1,7  | 1,8  | 2,1  | 0,8  | 2,1  | 2,7  | 0,4   | 0,8   | 0,1   | 1,4  | 0,8  | 2,4   | 4,5  | 2,5  | 0,8  | 3,5  |
| 2205052 | Somonino (2)       | -8,7 | 4,2  | -4,5 | -0,7 | 3,5  | -4,2 | -9,1  | -0,3  | -10,5 | 1,8  | -7,3 | 0,0   | -1,8 | 5,2  | 11,0 | -0,7 |
| 2205062 | Stężycza (2)       | 1,0  | -0,3 | 0,7  | 2,5  | 0,9  | 0,6  | -0,2  | 0,8   | -1,3  | -0,4 | -1,1 | -1,1  | 0,0  | -0,6 | 1,4  | 3,3  |
| 2205072 | Sulęczyno (2)      | 2,1  | 4,6  | 5,4  | -2,4 | -1,3 | 2,8  | 3,3   | 1,1   | 6,1   | 4,6  | 0,8  | 0,3   | 6,8  | 3,7  | 2,5  | 4,5  |
| 2205083 | Żukowo (3)         | 0,2  | 3,7  | 4,4  | -3,9 | -4,7 | -8,9 | -16,4 | -11,5 | -4,9  | -6,6 | -3,6 | -8,6  | 0,7  | 1,3  | -4,1 | -0,2 |
| 2208011 | Lębork (1)         | 2,6  | 0,3  | 1,3  | 1,2  | 2,1  | 1,7  | 1,0   | 2,3   | 0,2   | 1,4  | 1,2  | -1,1  | -1,1 | -0,5 | 0,8  | 0,1  |
| 2208021 | Łeba (1)           | 0,9  | 1,5  | -0,4 | 0,8  | 0,5  | -0,6 | -0,8  | -1,0  | -2,5  | -3,6 | -3,6 | -3,6  | -4,9 | -5,2 | -4,7 | -4,8 |
| 2208032 | Cewice (2)         | 0,1  | 1,7  | -0,5 | -2,3 | -1,9 | -0,4 | -1,4  | -3,5  | -1,1  | -4,2 | -3,5 | 2,6   | -1,9 | 0,0  | -0,1 | 0,3  |
| 2208042 | Nowa Wieś Lęborska | -0,7 | -3,8 | -4,8 | 0,5  | 1,7  | 4,5  | 7,4   | 6,5   | 1,9   | 3,5  | 5,7  | 6,8   | 8,2  | 0,8  | 10,3 | 6,2  |
| 2208052 | Wicko (2)          | -4,2 | -8,9 | -2,5 | 4,9  | 4,9  | -0,9 | 1,7   | 10,0  | 7,5   | 5,9  | 5,1  | 4,7   | 11,4 | 9,2  | 10,7 | 8,9  |
| 2209011 | Malbork (1)        | -2,5 | -1,8 | -2,3 | -1,8 | -3,7 | -0,6 | 2,1   | 0,5   | -2,0  | -1,1 | -3,9 | 1,4   | -0,3 | 0,1  | 1,2  | 2,4  |
| 2209032 | Lichnowy (2)       | -4,3 | -5,0 | -3,7 | -2,4 | -7,4 | -3,8 | -2,3  | -5,1  | 2,1   | -7,4 | 5,3  | -3,8  | -0,6 | 2,4  | -5,7 | 0,6  |
| 2209042 | Malbork (2)        | -1,8 | -1,3 | 1,3  | 1,1  | 2,5  | 1,9  | 0,3   | 2,3   | 0,7   | 1,9  | -0,2 | 0,8   | 5,3  | 2,3  | 5,7  | 4,1  |
| 2209062 | Miłoradz (2)       | 2,7  | -1,2 | 0,2  | 6,2  | 8,0  | 5,1  | 1,9   | 5,5   | 10,7  | 8,6  | 12,5 | 10,2  | 10,5 | 11,0 | 11,9 | 14,4 |
| 2209073 | Nowy Staw (3)      | -4,9 | -1,9 | -3,2 | 0,0  | 2,1  | 1,9  | 1,9   | 6,5   | 0,6   | 4,0  | -3,0 | -12,7 | 1,5  | 3,3  | -1,3 | -1,5 |
| 2209082 | Stare Pole (2)     | -4,8 | -5,0 | -2,9 | -2,9 | 2,6  | -1,3 | 1,0   | -1,2  | -0,4  | 0,3  | -2,9 | 4,7   | -1,2 | 5,2  | 0,3  | 7,6  |
| 2210011 | Krynica Morska (1) | 1,2  | -1,0 | 4,6  | 5,2  | 5,6  | 2,6  | 4,7   | 12,7  | 18,1  | 12,9 | 4,4  | 27,4  | 20,3 | 15,0 | 17,7 | 19,6 |
| 2210023 | Nowy Dwór Gdański  | -1,5 | -1,2 | -2,6 | -0,8 | -1,2 | 2,6  | -0,2  | 0,6   | 1,9   | 1,5  | 1,4  | 2,1   | 2,8  | 4,0  | 1,6  | 2,1  |
| 2210032 | Ostaszewo (2)      | 3,0  | 9,8  | 4,7  | 4,4  | 15,8 | 7,4  | 12,0  | 9,4   | 9,3   | 7,5  | 5,4  | 10,9  | 14,4 | 11,8 | 13,4 | 16,9 |
| 2210042 | Stegna (2)         | -0,1 | -4,6 | 0,2  | -4,3 | 5,9  | -3,0 | -2,3  | -1,0  | 0,3   | 1,0  | 0,2  | -0,1  | -4,5 | -0,4 | -3,6 | 1,0  |
| 2210052 | Sztutowo (2)       | -2,5 | 1,3  | 0,1  | 0,6  | -2,5 | -0,4 | 3,3   | 3,4   | 1,3   | 3,6  | -0,2 | 5,8   | 5,8  | 3,9  | 5,2  | 5,7  |
| 2211011 | Hel (1)            | 6,4  | 2,0  | 9,9  | 5,0  | 6,5  | 11,1 | 14,7  | 9,3   | 4,9   | 10,9 | 3,6  | 11,8  | 23,5 | 16,5 | 13,0 | 17,6 |
| 2211031 | Puck (1)           | -2,6 | 1,3  | 0,7  | -0,1 | 0,7  | 0,5  | 1,3   | -1,7  | 0,1   | -1,2 | -3,7 | 0,8   | 1,0  | -2,5 | -2,9 | 0,2  |
| 2211041 | Władysławowo (1)   | 8,3  | 6,1  | 10,2 | 14,3 | 10,4 | 8,1  | 14,9  | 27,9  | 24,9  | 28,3 | 34,6 | 44,9  | 36,2 | 30,6 | 34,1 | 37,1 |
| 2211052 | Kosakowo (2)       | 4,0  | 3,1  | 7,3  | 8,9  | 12,0 | 11,5 | 11,3  | 15,2  | 22,1  | 26,6 | 18,5 | 22,9  | 27,9 | 17,4 | 18,7 | 21,1 |
| 2211062 | Krokowa (2)        | -2,0 | -3,0 | -0,3 | -2,0 | -8,0 | 3,7  | 4,1   | 2,7   | 5,4   | 11,8 | 2,7  | 7,0   | 10,9 | -1,0 | 2,6  | 4,5  |
| 2211072 | Puck (2)           | 2,6  | 1,1  | 2,4  | 1,4  | 4,7  | 3,6  | 2,2   | 7,9   | 9,3   | 14,4 | 14,9 | 17,6  | 23,2 | 15,8 | 17,5 | 19,9 |
| 2214011 | Tczew (1)          | -0,2 | -0,1 | 3,4  | 11,2 | 8,5  | 7,6  | 6,8   | 22,3  | 14,4  | 15,3 | 23,5 | 38,2  | 31,7 | 32,1 | 22,4 | 26,6 |
| 2214023 | Gniew (3)          | -4,8 | 3,6  | -3,6 | -2,6 | -8,4 | 0,3  | 3,9   | 1,3   | -6,4  | 0,5  | 5,4  | 4,9   | 0,8  | 0,3  | 5,2  | 0,5  |
| 2214032 | Morzeszczyn (2)    | -3,6 | -2,5 | 1,5  | -0,2 | 2,2  | 1,7  | -0,2  | 3,3   | 6,3   | 1,1  | 3,2  | 7,7   | 2,3  | 3,9  | 4,7  | 6,3  |
| 2214043 | Pelplin (3)        | 10,3 | 5,1  | 12,1 | 6,0  | 10,9 | 8,4  | 8,3   | 11,0  | 16,9  | 13,6 | 15,2 | 33,5  | 31,7 | 22,6 | 27,4 | 32,8 |
| 2214052 | Subkowy (2)        | -6,8 | 1,8  | 0,6  | -4,0 | -1,5 | 4,4  | 1,4   | 3,9   | 9,1   | 8,8  | 1,0  | 8,6   | 12,9 | 16,3 | 26,9 | 25,7 |
| 2214062 | Tczew (2)          | 2,5  | 2,0  | 1,6  | 0,8  | 1,1  | 0,9  | 3,1   | 1,4   | 0,5   | 1,0  | 2,0  | 0,2   | -0,3 | 0,0  | 0,6  | 0,5  |
| 2215011 | Reda (1)           | 7,3  | 1,2  | 1,0  | 0,5  | 6,5  | 2,7  | 12,8  | 9,1   | 13,1  | 14,7 | 11,5 | 14,8  | 28,0 | 12,9 | 18,7 | 12,4 |
| 2215021 | Rumia (1)          | 5,1  | -2,7 | -0,2 | 6,0  | -0,2 | 3,5  | 3,2   | -1,0  | -0,2  | 4,6  | 0,8  | 1,3   | 18,2 | 2,2  | 4,6  | 4,9  |

|         |                       |      |      |       |      |      |      |       |       |       |       |       |       |       |       |       |       |
|---------|-----------------------|------|------|-------|------|------|------|-------|-------|-------|-------|-------|-------|-------|-------|-------|-------|
| 2215031 | Wejherowo (1)         | 0,0  | -2,1 | 7,1   | 7,4  | 37,4 | 28,9 | 34,0  | 33,1  | 23,6  | 34,3  | 27,7  | 37,6  | 37,9  | 13,2  | 24,1  | 21,4  |
| 2215042 | Choczewo (2)          | 16,8 | 19,1 | 17,1  | 22,9 | 17,9 | 15,2 | 16,7  | 16,7  | 20,6  | 26,1  | 24,0  | 24,7  | 37,4  | 32,6  | 37,6  | 47,1  |
| 2215052 | Gniewino (2)          | 3,3  | -9,6 | -1,4  | 2,3  | 3,0  | -3,0 | 3,6   | 6,2   | -5,9  | 3,2   | 4,5   | -0,4  | 0,6   | 1,7   | 1,3   | 3,0   |
| 2215062 | Linia (2)             | -1,8 | 1,5  | 10,5  | 0,8  | 8,3  | 2,0  | 8,0   | 7,1   | 6,0   | 11,6  | 12,0  | 13,7  | 11,5  | 10,9  | 16,4  | 10,0  |
| 2215072 | Luzino (2)            | -5,1 | -3,0 | -3,7  | -7,0 | -2,7 | -1,1 | 6,0   | -2,9  | -11,0 | -1,3  | 6,3   | 2,1   | 4,6   | 7,9   | 2,8   | 7,8   |
| 2215082 | Łęczyce (2)           | -0,3 | 2,9  | -3,0  | 2,2  | 0,3  | -3,5 | 0,4   | -1,0  | 6,9   | 5,3   | 4,0   | 3,1   | 11,2  | 8,3   | 4,4   | 9,1   |
| 2215092 | Szemud (2)            | 0,3  | 3,6  | 6,6   | 0,0  | 1,8  | 6,0  | -0,8  | -10,7 | -3,2  | 5,5   | 7,6   | -0,5  | 3,2   | 1,5   | 6,1   | 5,7   |
| 2215102 | Wejherowo (2)         | -1,9 | -1,8 | -2,4  | 0,1  | 0,2  | 2,9  | 0,4   | 0,2   | 1,3   | -0,8  | -1,2  | 1,9   | 0,5   | 0,5   | -0,1  | 0,2   |
| 2261011 | Gdańsk (1)            | 1,3  | 0,8  | -3,9  | 4,8  | -0,2 | 1,4  | 8,1   | 5,3   | 7,3   | 1,3   | 2,6   | 8,5   | 12,8  | 5,8   | 12,1  | 20,1  |
| 2262011 | Gdynia (1)            | 3,9  | 0,7  | 2,2   | 0,1  | 1,6  | -0,7 | 2,2   | -1,6  | 1,9   | 3,4   | -1,6  | 0,9   | 3,2   | 0,6   | 2,1   | 0,3   |
| 2264011 | Sopot (1)             | 3,5  | 1,5  | 5,7   | 5,3  | 3,6  | 3,7  | 0,9   | 6,3   | 5,0   | 3,1   | 4,1   | 1,1   | 3,9   | 1,4   | 0,9   | 5,6   |
| 3003011 | Gnieszno (1)          | -1,2 | 0,9  | 1,3   | 1,3  | 4,4  | 3,4  | 1,8   | 5,4   | 1,3   | 4,0   | 3,6   | 2,3   | 2,5   | 3,7   | 7,1   | 5,1   |
| 3003023 | Czarniejewo (3)       | -4,0 | -0,7 | 1,7   | 1,1  | 1,3  | -6,6 | 1,9   | -0,6  | 5,8   | -1,3  | 5,6   | 2,5   | 2,4   | 3,8   | -5,8  | -2,7  |
| 3003032 | Gnieszno (2)          | 5,0  | 10,1 | 16,6  | 11,3 | 12,3 | 11,1 | 10,3  | 23,9  | 19,6  | 24,0  | 24,2  | 26,7  | 33,2  | 24,2  | 23,7  | 24,2  |
| 3003042 | Kiszkowo (2)          | 11,9 | 13,3 | -8,6  | 8,7  | 0,0  | 13,2 | 12,3  | 35,1  | -11,5 | 5,3   | 12,8  | 15,3  | -16,0 | 0,0   | -3,7  | 2,2   |
| 3003062 | Łubowo (2)            | 0,9  | -1,9 | -1,2  | -2,2 | -2,9 | -3,2 | 0,4   | -4,1  | -3,0  | -5,4  | -3,6  | -2,7  | -1,6  | -0,9  | -3,2  | -3,7  |
| 3005012 | Granowo (2)           | -6,0 | -1,2 | 0,0   | -9,6 | -4,5 | 1,8  | -1,8  | -6,3  | -0,3  | -8,2  | -4,0  | -1,9  | -3,1  | -3,1  | -7,1  | 4,9   |
| 3005023 | Grodzisk Wielkopolski | 0,2  | 3,1  | 2,0   | 8,0  | 4,0  | 4,8  | 4,3   | 5,0   | 6,7   | -0,4  | 2,9   | -1,6  | 1,7   | 7,0   | 0,3   | 2,4   |
| 3011011 | Kościan (1)           | -1,6 | -7,1 | 0,3   | -4,6 | 6,5  | 6,7  | 0,8   | -6,7  | -3,6  | 3,3   | 3,9   | -4,8  | -5,7  | -2,3  | 5,1   | 0,0   |
| 3011023 | Czempiń (3)           | -8,1 | -6,5 | -2,7  | 2,1  | -1,5 | -2,9 | -3,6  | -12,4 | -12,1 | -12,1 | -14,3 | -15,1 | -18,2 | -10,5 | -11,8 | -10,8 |
| 3011032 | Kościan (2)           | -6,1 | -1,7 | 13,7  | 5,7  | -2,0 | -4,5 | -4,3  | 2,8   | 7,6   | 9,6   | -3,2  | 2,5   | -0,8  | -0,5  | -5,6  | -6,0  |
| 3015043 | Nowy Tomyśl (3)       | -2,3 | -1,8 | -0,8  | -0,9 | -5,5 | -2,4 | 0,7   | 0,7   | -4,5  | -1,5  | -1,7  | -1,6  | -2,2  | -1,8  | -2,3  | -5,7  |
| 3015053 | Opalenica (3)         | 3,4  | 3,1  | 2,5   | 3,1  | 1,4  | 3,7  | 2,9   | 2,7   | -1,8  | -2,1  | -2,4  | 4,8   | -3,7  | -4,7  | -2,8  | -1,7  |
| 3016013 | Oborniki (3)          | 23,5 | -6,8 | 1,4   | 22,7 | 29,0 | -3,2 | -6,9  | -8,6  | 28,6  | 61,8  | 26,9  | 44,4  | 44,5  | 21,7  | 24,7  | 29,8  |
| 3016023 | Rogoźno (3)           | -2,6 | -0,2 | 3,2   | 5,5  | -1,3 | 0,5  | 1,5   | -1,5  | -4,4  | -0,5  | 3,7   | -3,2  | 2,8   | 1,3   | -2,3  | 0,8   |
| 3021011 | Luboń (1)             | 2,8  | 1,3  | 0,8   | 0,0  | 4,4  | 2,7  | 0,9   | 4,4   | 12,5  | 12,9  | 10,6  | 9,6   | 14,4  | 11,0  | 13,3  | 13,9  |
| 3021021 | Puszczykowo (1)       | 13,4 | 13,6 | 14,8  | 17,5 | 9,6  | 2,8  | 7,2   | 6,5   | 14,6  | 9,3   | 7,2   | 11,5  | 20,5  | 18,6  | 20,7  | 19,8  |
| 3021033 | Buk (3)               | 7,1  | 7,9  | 7,5   | 7,1  | 9,9  | 10,9 | 19,2  | 11,3  | 4,1   | 0,5   | 6,2   | 1,6   | 7,8   | 6,1   | 7,8   | 4,1   |
| 3021042 | Czerwonak (2)         | -2,2 | -2,2 | -1,2  | -2,8 | -2,4 | -1,8 | -1,5  | -2,6  | -5,2  | 2,0   | 4,4   | 8,8   | 6,3   | 10,2  | 9,4   | 7,1   |
| 3021052 | Dopiewo (2)           | -6,3 | -5,7 | -10,9 | -6,5 | -4,3 | -2,8 | -6,3  | -8,5  | -3,4  | -1,3  | -4,5  | 0,5   | -5,2  | -3,8  | -8,5  | -5,2  |
| 3021062 | Kleszczewo (2)        | 2,9  | -0,2 | -0,6  | -1,1 | 2,8  | 2,5  | 0,5   | 1,7   | 1,4   | 1,5   | 1,5   | 2,8   | -3,3  | 1,6   | 5,0   | -1,8  |
| 3021072 | Komorniki (2)         | -7,1 | -4,3 | -3,2  | -1,7 | 0,4  | -1,5 | -1,1  | 0,9   | 5,4   | 2,5   | 2,4   | -3,6  | -2,4  | -3,9  | -0,7  | -1,3  |
| 3021083 | Kostrzyn (3)          | 6,9  | 11,4 | 6,6   | 13,8 | 14,1 | 6,7  | 9,3   | 9,7   | 13,7  | 11,1  | 12,5  | 14,0  | 14,2  | 10,1  | 10,5  | 5,8   |
| 3021093 | Kórnik (3)            | -0,4 | 1,6  | -0,3  | -5,4 | -1,6 | 1,3  | -1,0  | 1,5   | -3,7  | -2,0  | -0,2  | -1,9  | -1,4  | 0,0   | 5,3   | -1,2  |
| 3021103 | Mosina (3)            | 8,3  | 5,3  | 2,3   | 7,1  | 4,4  | 12,4 | 11,9  | 13,4  | 25,0  | 24,1  | 21,6  | 20,9  | 25,1  | 24,8  | 24,5  | 15,5  |
| 3021113 | Murowana Goślina (3)  | 9,4  | 6,9  | 11,9  | 11,7 | 10,3 | 17,0 | 13,0  | 18,9  | 36,1  | 40,5  | 24,8  | 31,0  | 28,5  | 14,8  | 17,2  | 23,0  |
| 3021123 | Pobiedziska (3)       | 4,3  | 4,7  | 2,9   | 1,2  | 0,7  | 2,0  | 0,0   | -1,4  | -1,9  | -4,4  | -1,9  | -3,7  | -4,0  | -5,2  | -2,2  | -2,9  |
| 3021132 | Rokietnica (2)        | 5,4  | -5,1 | -0,2  | -2,0 | 1,5  | 2,1  | -11,1 | 2,6   | 4,1   | -5,7  | -0,3  | -9,2  | -10,1 | -0,8  | -3,7  | 0,3   |

|         |                        |      |       |      |       |      |      |       |      |      |       |       |       |       |       |      |      |
|---------|------------------------|------|-------|------|-------|------|------|-------|------|------|-------|-------|-------|-------|-------|------|------|
| 3021143 | Stęszew (3)            | -4,8 | -9,1  | -8,6 | -14,6 | -8,2 | -1,4 | -13,8 | -7,2 | -9,4 | -12,8 | -19,9 | -17,6 | -7,4  | -1,0  | -3,0 | -2,0 |
| 3021152 | Suchy Las (2)          | -1,3 | -4,6  | 1,8  | 0,5   | 3,1  | 3,5  | 4,6   | 6,3  | 6,4  | 10,3  | 9,4   | 6,5   | 11,8  | 5,0   | 4,9  | 5,5  |
| 3021163 | Swarzędz (3)           | -3,6 | -4,5  | 0,8  | 1,5   | 0,0  | -0,2 | -7,2  | -0,2 | -2,8 | 0,7   | -2,7  | -1,1  | 6,2   | 6,7   | 0,9  | 2,5  |
| 3021172 | Tarnowo Podgórne (2)   | 0,7  | 0,9   | -0,6 | -2,3  | -2,1 | -2,4 | 0,2   | 1,0  | -1,2 | 0,5   | 0,2   | -0,2  | -3,6  | 0,4   | 0,0  | -0,3 |
| 3024022 | Duszniki (2)           | -7,1 | 2,1   | -7,7 | 1,9   | 0,0  | -0,2 | -4,8  | -3,3 | -5,9 | 3,3   | -3,9  | -3,5  | -2,8  | -1,5  | 1,9  | -5,0 |
| 3024032 | Kaźmierz (2)           | -9,4 | 2,6   | -9,7 | 10,6  | 1,0  | 0,3  | 1,0   | 7,9  | -3,7 | -2,5  | -1,0  | 11,4  | 4,9   | 12,1  | 22,2 | 8,5  |
| 3024073 | Szamotuły (3)          | -4,3 | -10,0 | 3,4  | -2,6  | 2,0  | -0,9 | -4,0  | -3,2 | 3,2  | -5,8  | -5,3  | -6,4  | -12,0 | -15,1 | -2,7 | -5,6 |
| 3025012 | Dominowo (2)           | -6,1 | 2,1   | -6,6 | -4,5  | -3,1 | -0,9 | -4,9  | -2,5 | -6,5 | -7,8  | -1,5  | -5,0  | -5,1  | -10,9 | -3,5 | -5,8 |
| 3025043 | Środa Wielkopolska (2) | -7,6 | 1,3   | 4,0  | 4,0   | 6,3  | -0,7 | -4,0  | 9,0  | -2,0 | -0,2  | 0,4   | -1,1  | -2,2  | -0,4  | 1,7  | 4,2  |
| 3025052 | Zaniemyśl (2)          | 1,4  | 1,5   | 1,3  | -0,8  | 2,0  | 1,0  | 1,2   | 0,0  | -1,5 | -0,4  | -0,6  | -1,9  | -3,0  | -2,5  | -3,7 | -4,4 |
| 3026012 | Brodnica (2)           | -3,1 | -1,1  | -1,1 | 1,4   | -4,3 | -3,5 | 2,7   | -2,6 | -3,4 | -6,5  | -1,9  | -2,9  | -6,3  | -3,7  | -6,2 | -2,1 |
| 3026043 | Śrem (3)               | 0,5  | 1,3   | 3,3  | -4,6  | -7,9 | -9,6 | -1,1  | -2,6 | 0,5  | -3,9  | -4,2  | -3,9  | -6,3  | -9,4  | -8,1 | 0,5  |
| 3028011 | Wągrowiec (1)          | -1,1 | -1,1  | 2,5  | -2,0  | 1,3  | 0,6  | -2,8  | 3,2  | -2,0 | -1,3  | -1,7  | -1,1  | 0,7   | -2,5  | -1,3 | -3,0 |
| 3028053 | Skoki (3)              | -2,0 | -3,0  | -1,6 | -1,2  | -4,2 | 0,4  | 2,0   | 6,9  | 2,7  | 1,7   | 1,7   | 5,7   | 3,4   | -2,8  | 1,9  | -1,9 |
| 3028072 | Wągrowiec (2)          | 0,0  | 1,2   | 1,8  | 5,9   | 0,3  | 3,8  | 3,6   | 4,7  | 4,8  | 10,9  | 4,2   | 6,5   | 19,6  | 11,4  | 15,1 | 14,3 |
| 3030033 | Nekla (3) *            | 0,8  | 1,0   | -0,2 | -0,8  | -0,4 | -0,6 | -0,3  | -0,4 | -0,5 | -1,7  | 0,0   | -0,3  | -1,5  | -0,1  | -0,5 | -0,2 |
| 3030053 | Września (3)           | 1,6  | 2,6   | 3,0  | 3,7   | 3,9  | 3,1  | 2,2   | 2,6  | 1,5  | 1,2   | 0,0   | -1,7  | -4,6  | -3,2  | -4,2 | -2,7 |
| 3064011 | Poznań (1)             | -3,5 | -2,7  | -3,5 | -3,4  | -2,8 | -4,9 | -3,1  | -5,2 | -3,1 | -2,8  | -1,2  | -6,4  | -7,7  | -6,7  | -3,6 | -3,5 |

Source: data from Poland's Central Statistical Office (GUS)
