# Supplementary material
Source: MDPI journal article supplement (https://www.mdpi.com/2071-1050/10/3/837)
Supplement: s1 [file s1]

| KOD GUS | Municipality         | Population density of a municipality 1995-2010; [people/km2] |        |        |        |        |        |        |        |        |        |        |        |        |        |        |        |
|---------|----------------------|--------------------------------------------------------------|--------|--------|--------|--------|--------|--------|--------|--------|--------|--------|--------|--------|--------|--------|--------|
|         |                      | 1995                                                         | 1996   | 1997   | 1998   | 1999   | 2000   | 2001   | 2002   | 2003   | 2004   | 2005   | 2006   | 2007   | 2008   | 2009   | 2010   |
| 0214011 | Oleśnica (1)         | 1858,4                                                       | 1862,6 | 1858,7 | 1857,4 | 1779,1 | 1781,5 | 1779,2 | 1774,4 | 1775,0 | 1764,6 | 1762,7 | 1761,8 | 1757,6 | 1762,7 | 1762,2 | 1769,0 |
| 0214032 | Dobroszyce (2)       | 44,6                                                         | 44,6   | 44,5   | 44,0   | 43,8   | 43,9   | 44,2   | 44,8   | 45,2   | 45,5   | 45,9   | 46,0   | 46,2   | 46,2   | 47,0   | 48,0   |
| 0214062 | Oleśnica (2)         | 43,6                                                         | 43,6   | 43,6   | 44,0   | 44,7   | 44,7   | 44,9   | 45,7   | 46,0   | 46,2   | 46,5   | 46,7   | 47,2   | 47,9   | 48,5   | 50,8   |
| 0215011 | Oława (1)            | 1165,9                                                       | 1165,8 | 1167,0 | 1167,2 | 1134,3 | 1135,5 | 1138,9 | 1139,4 | 1136,5 | 1136,7 | 1130,3 | 1128,1 | 1128,4 | 1127,4 | 1129,5 | 1162,6 |
| 0215022 | Domaniów (2)         | 57,0                                                         | 56,9   | 57,1   | 57,2   | 56,0   | 56,1   | 56,0   | 56,0   | 56,4   | 56,1   | 56,4   | 56,3   | 56,1   | 56,2   | 56,1   | 56,9   |
| 0215033 | Jelcz-Laskowice (3)  | 128,1                                                        | 128,3  | 128,6  | 129,0  | 125,1  | 125,8  | 126,4  | 127,2  | 127,2  | 127,8  | 127,8  | 128,4  | 129,3  | 130,5  | 131,7  | 136,0  |
| 0215042 | Oława (2)            | 55,0                                                         | 54,8   | 55,2   | 55,5   | 54,7   | 55,1   | 55,5   | 55,7   | 56,2   | 56,5   | 57,2   | 57,6   | 58,3   | 59,1   | 60,0   | 62,7   |
| 0217012 | Borów (2)            | 54,3                                                         | 53,9   | 54,0   | 54,0   | 52,5   | 52,9   | 52,9   | 53,5   | 53,5   | 53,4   | 53,2   | 52,4   | 52,5   | 52,7   | 52,7   | 53,3   |
| 0218012 | Kostomłoty (2)       | 47,8                                                         | 47,8   | 47,8   | 47,7   | 47,2   | 47,1   | 47,5   | 47,6   | 47,4   | 47,5   | 47,1   | 47,3   | 47,3   | 47,5   | 47,6   | 49,2   |
| 0218032 | Miękinia (2)         | 60,7                                                         | 60,5   | 61,3   | 61,6   | 60,5   | 60,8   | 61,0   | 62,0   | 63,3   | 64,3   | 64,3   | 65,6   | 66,7   | 67,7   | 68,9   | 74,0   |
| 0218043 | Środa Śląska (3)     | 89,9                                                         | 89,9   | 89,7   | 89,7   | 87,8   | 88,3   | 88,3   | 88,5   | 88,4   | 88,4   | 88,7   | 88,5   | 88,8   | 89,1   | 89,3   | 90,4   |
| 0220013 | Oborniki Śląskie (3) | 107,8                                                        | 108,9  | 109,6  | 109,9  | 110,8  | 111,7  | 112,7  | 113,8  | 114,6  | 115,5  | 116,0  | 116,4  | 117,9  | 118,8  | 120,0  | 124,0  |
| 0220023 | Prusice (3) *        | 58,7                                                         | 58,8   | 59,2   | 59,0   | 57,7   | 58,0   | 58,0   | 58,0   | 58,2   | 58,2   | 58,1   | 58,1   | 58,0   | 58,2   | 58,0   | 59,3   |
| 0220033 | Trzebnica (3)        | 107,3                                                        | 107,8  | 108,4  | 108,9  | 106,8  | 107,2  | 107,5  | 108,2  | 108,3  | 108,7  | 108,8  | 109,5  | 110,4  | 110,9  | 111,9  | 114,7  |
| 0220042 | Wisznia Mała (2)     | 66,6                                                         | 68,1   | 69,0   | 69,5   | 72,1   | 72,8   | 74,2   | 74,9   | 75,3   | 76,2   | 76,6   | 77,9   | 80,1   | 81,4   | 82,9   | 89,6   |
| 0220052 | Zawonia (2)          | 43,8                                                         | 44,1   | 44,2   | 44,5   | 44,6   | 45,1   | 45,4   | 45,3   | 45,4   | 45,9   | 46,0   | 46,6   | 46,8   | 47,3   | 47,1   | 48,6   |
| 0222013 | Brzeg Dolny (3)      | 182,7                                                        | 183,6  | 183,0  | 181,6  | 173,4  | 173,1  | 173,3  | 172,6  | 173,0  | 172,7  | 171,9  | 171,8  | 172,2  | 171,9  | 171,0  | 172,6  |
| 0223012 | Czernica (2)         | 85,1                                                         | 85,5   | 86,3   | 87,7   | 94,4   | 95,7   | 96,8   | 99,4   | 102,0  | 104,3  | 108,0  | 114,4  | 119,1  | 123,3  | 128,3  | 139,9  |
| 0223022 | Długoleka (2)        | 80,2                                                         | 80,6   | 81,4   | 82,6   | 86,2   | 87,6   | 88,7   | 90,5   | 92,7   | 95,4   | 97,1   | 99,3   | 102,5  | 104,9  | 107,4  | 112,7  |
| 0223032 | Jordanów Śląski (2)  | 53,5                                                         | 53,2   | 53,4   | 53,2   | 51,8   | 52,0   | 52,3   | 52,0   | 52,2   | 52,9   | 53,1   | 53,7   | 54,0   | 53,6   | 53,7   | 54,8   |
| 0223043 | Kąty Wrocławskie (3) | 97,0                                                         | 97,2   | 97,9   | 98,1   | 95,0   | 95,4   | 95,3   | 96,3   | 96,9   | 98,1   | 99,6   | 102,2  | 104,3  | 106,4  | 108,9  | 119,1  |
| 0223052 | Kobierzyce (2)       | 76,3                                                         | 76,4   | 77,2   | 78,6   | 80,3   | 80,7   | 81,4   | 83,3   | 84,6   | 85,9   | 87,7   | 91,8   | 95,1   | 99,1   | 102,2  | 112,5  |
| 0223062 | Mietków (2)          | 47,3                                                         | 47,3   | 47,0   | 47,2   | 46,1   | 45,8   | 46,3   | 46,9   | 46,2   | 46,3   | 46,5   | 46,8   | 46,3   | 46,2   | 46,3   | 46,1   |
| 0223073 | Sobótka (3)          | 91,5                                                         | 91,5   | 91,6   | 91,4   | 90,3   | 90,4   | 90,4   | 90,8   | 91,4   | 91,1   | 91,3   | 90,9   | 91,1   | 91,4   | 92,0   | 93,4   |
| 0223083 | Siechnice (3) *      | 123,9                                                        | 123,9  | 125,3  | 126,0  | 127,0  | 128,2  | 129,0  | 130,3  | 132,1  | 134,5  | 135,7  | 140,2  | 144,9  | 148,4  | 153,2  | 164,4  |
| 0223092 | Żórawina (2)         | 64,7                                                         | 64,8   | 65,0   | 64,8   | 64,2   | 64,5   | 64,8   | 64,9   | 65,2   | 65,7   | 65,6   | 65,9   | 67,0   | 68,0   | 70,2   | 76,3   |
| 0264011 | Wrocław (1)          | 2192,2                                                       | 2187,5 | 2183,4 | 2178,2 | 2197,5 | 2187,6 | 2188,2 | 2182,6 | 2177,1 | 2172,7 | 2171,6 | 2167,3 | 2161,5 | 2158,9 | 2158,8 | 2153,9 |
| 0608011 | Lubartów (1)         | 1688,4                                                       | 1695,0 | 1702,7 | 1706,8 | 1668,6 | 1661,8 | 1667,1 | 1658,3 | 1661,6 | 1653,0 | 1653,5 | 1648,3 | 1639,3 | 1628,7 | 1624,7 | 1642,4 |
| 0608072 | Lubartów (2)         | 60,1                                                         | 60,2   | 60,3   | 60,4   | 60,5   | 61,0   | 61,4   | 61,9   | 62,7   | 63,6   | 63,9   | 64,6   | 65,9   | 66,5   | 67,2   | 68,0   |
| 0609013 | Bełżyce (3)          | 101,4                                                        | 102,2  | 102,5  | 102,4  | 103,9  | 104,0  | 104,0  | 103,8  | 103,6  | 103,8  | 103,8  | 103,3  | 103,3  | 103,1  | 103,1  | 101,7  |
| 0609033 | Bychawa (3)          | 88,5                                                         | 88,8   | 88,8   | 88,5   | 85,9   | 85,5   | 85,7   | 85,3   | 84,9   | 84,8   | 84,2   | 84,1   | 83,9   | 83,7   | 83,1   | 84,1   |
| 0609042 | Garbów (2)           | 89,6                                                         | 89,7   | 89,6   | 89,5   | 88,0   | 88,5   | 88,4   | 87,7   | 87,2   | 87,6   | 87,4   | 87,7   | 87,4   | 87,4   | 87,4   | 87,5   |
| 0609052 | Głusk (2)            | 91,8                                                         | 92,5   | 94,3   | 95,1   | 98,5   | 99,8   | 101,4  | 104,0  | 105,5  | 108,9  | 113,3  | 117,4  | 121,1  | 123,9  | 129,0  | 137,5  |
| 0609062 | Jabłonna (2)         | 116,5                                                        | 118,5  | 121,5  | 124,8  | 142,6  | 147,8  | 154,1  | 163,7  | 173,3  | 186,2  | 198,4  | 208,8  | 221,2  | 230,3  | 239,6  | 251,2  |
| 0609072 | Jastków (2)          | 92,3                                                         | 92,8   | 93,9   | 94,5   | 97,8   | 98,9   | 100,4  | 101,6  | 103,6  | 105,5  | 107,0  | 108,8  | 111,5  | 112,4  | 113,6  | 116,0  |
| 0609082 | Konopnica (2)        | 106,8                                                        | 107,2  | 107,9  | 108,7  | 105,6  | 106,7  | 108,1  | 110,3  | 113,2  | 115,5  | 116,9  | 120,0  | 122,8  | 124,1  | 124,8  | 131,0  |

|         |                     |        |        |        |        |        |        |        |        |        |        |        |        |        |        |        |        |
|---------|---------------------|--------|--------|--------|--------|--------|--------|--------|--------|--------|--------|--------|--------|--------|--------|--------|--------|
| 0609102 | Niedzwica Duża (2)  | 99,0   | 99,4   | 100,1  | 100,6  | 100,3  | 101,1  | 101,2  | 101,4  | 101,8  | 102,6  | 103,0  | 103,7  | 104,0  | 104,9  | 106,2  | 107,0  |
| 0609112 | Niemce (2)          | 104,3  | 105,2  | 105,8  | 106,6  | 107,6  | 108,5  | 109,5  | 110,2  | 112,2  | 113,7  | 115,1  | 117,1  | 119,0  | 120,7  | 123,0  | 125,4  |
| 0609122 | Strzyżewice (2)     | 70,6   | 70,4   | 70,6   | 71,0   | 69,0   | 69,0   | 68,5   | 68,4   | 68,4   | 69,1   | 69,8   | 70,1   | 70,2   | 69,7   | 69,6   | 70,6   |
| 0609132 | Wojciechów (2)      | 74,6   | 73,9   | 73,4   | 73,0   | 72,3   | 72,5   | 72,1   | 72,2   | 72,6   | 72,6   | 73,5   | 73,7   | 73,7   | 73,8   | 73,5   | 73,6   |
| 0609142 | Wółka (2)           | 90,4   | 91,1   | 91,4   | 92,1   | 100,8  | 103,6  | 107,5  | 110,3  | 114,5  | 119,8  | 124,0  | 128,5  | 134,3  | 138,0  | 141,0  | 141,6  |
| 0610033 | Łączna (3)          | 335,5  | 337,5  | 344,0  | 342,8  | 340,0  | 340,8  | 340,9  | 339,5  | 337,7  | 337,6  | 337,2  | 334,1  | 331,2  | 329,7  | 328,5  | 327,4  |
| 0610062 | Spiczyn (2)         | 67,5   | 67,2   | 66,4   | 65,8   | 63,7   | 64,3   | 64,0   | 63,4   | 63,6   | 65,2   | 66,1   | 65,8   | 65,5   | 65,5   | 65,5   | 66,1   |
| 0614083 | Nałęczów (3)        | 165,6  | 166,3  | 167,1  | 166,4  | 160,7  | 157,5  | 155,0  | 154,4  | 152,4  | 151,9  | 151,3  | 150,9  | 150,1  | 150,5  | 151,1  | 148,7  |
| 0617011 | Świdnik (1)         | 1984,7 | 1994,5 | 1997,5 | 2004,8 | 1974,1 | 1978,0 | 1975,0 | 1971,2 | 1975,8 | 1968,0 | 1967,6 | 1969,6 | 1970,1 | 1968,1 | 1960,6 | 2002,0 |
| 0617022 | Mełgiew (2)         | 78,5   | 78,9   | 78,9   | 79,1   | 80,4   | 80,8   | 81,4   | 82,5   | 84,3   | 85,7   | 86,4   | 89,0   | 90,8   | 91,9   | 93,4   | 93,8   |
| 0617033 | Piaski (3)          | 67,8   | 67,2   | 66,8   | 66,6   | 64,8   | 64,5   | 64,3   | 64,4   | 64,2   | 63,8   | 63,4   | 63,1   | 63,0   | 62,8   | 62,7   | 63,6   |
| 0663011 | Lublin (1)          | 2403,7 | 2409,6 | 2413,6 | 2415,3 | 2434,9 | 2433,4 | 2421,4 | 2429,5 | 2417,4 | 2413,5 | 2406,6 | 2397,3 | 2385,9 | 2376,8 | 2369,9 | 2370,2 |
| 1201011 | Bochnia (1)         | 989,3  | 995,8  | 997,3  | 999,9  | 981,6  | 981,4  | 982,5  | 982,8  | 984,4  | 988,2  | 986,5  | 984,4  | 985,7  | 991,1  | 995,9  | 1009,9 |
| 1201022 | Bochnia (2)         | 143,9  | 144,4  | 145,1  | 145,7  | 144,9  | 145,4  | 146,2  | 147,7  | 148,2  | 138,5  | 139,1  | 141,0  | 141,9  | 142,3  | 142,8  | 143,5  |
| 1201032 | Drwinia (2)         | 57,5   | 57,4   | 57,5   | 57,5   | 57,3   | 57,2   | 57,6   | 57,8   | 58,1   | 57,7   | 57,8   | 58,7   | 58,8   | 58,6   | 59,0   | 59,6   |
| 1201052 | Łapanów (2)         | 99,8   | 100,6  | 100,9  | 101,6  | 101,6  | 102,5  | 102,4  | 102,7  | 103,5  | 104,6  | 105,2  | 105,5  | 106,2  | 106,1  | 106,9  | 107,5  |
| 1201063 | Nowy Wiśnicz (3)    | 148,7  | 150,7  | 151,1  | 152,1  | 150,3  | 151,4  | 151,2  | 151,9  | 154,1  | 155,4  | 156,1  | 156,8  | 158,5  | 159,4  | 160,3  | 161,5  |
| 1201072 | Rzezawa (2)         | 117,7  | 118,1  | 118,2  | 118,3  | 120,1  | 120,3  | 120,8  | 121,0  | 121,4  | 122,0  | 122,3  | 121,7  | 122,5  | 123,1  | 124,0  | 126,7  |
| 1201082 | Trzciana (2)        | 111,9  | 121,0  | 120,6  | 111,2  | 112,2  | 112,4  | 113,2  | 113,5  | 114,2  | 113,8  | 114,2  | 114,7  | 114,9  | 115,3  | 116,8  | 117,8  |
| 1201092 | Żegocina (2)        | 124,7  | 115,8  | 117,1  | 129,7  | 134,5  | 136,1  | 137,2  | 138,4  | 138,3  | 138,1  | 140,0  | 142,5  | 143,7  | 145,3  | 145,9  | 148,3  |
| 1206012 | Czernichów (2)      | 150,0  | 150,7  | 151,6  | 152,3  | 150,1  | 151,0  | 151,4  | 152,5  | 153,1  | 152,7  | 152,8  | 151,3  | 152,0  | 153,5  | 157,1  | 161,9  |
| 1206022 | Igołomia-Wawrzeńc   | 121,2  | 121,9  | 123,0  | 123,0  | 123,3  | 123,3  | 123,2  | 122,2  | 122,0  | 121,9  | 121,9  | 121,8  | 121,7  | 122,1  | 122,6  | 123,9  |
| 1206032 | Iwanowice (2)       | 110,8  | 110,7  | 111,4  | 110,9  | 113,2  | 113,4  | 113,6  | 114,6  | 115,5  | 116,4  | 116,9  | 116,9  | 118,3  | 119,7  | 120,8  | 120,3  |
| 1206042 | Jerzmanowice-Prze   | 148,5  | 148,1  | 148,3  | 148,5  | 150,4  | 150,7  | 151,4  | 151,4  | 151,8  | 152,4  | 152,4  | 153,6  | 154,7  | 155,0  | 156,2  | 156,0  |
| 1206052 | Kocmyrzów-Luborzy   | 145,0  | 146,0  | 148,2  | 148,9  | 152,5  | 152,7  | 154,2  | 154,6  | 155,7  | 158,1  | 159,5  | 164,0  | 165,8  | 167,3  | 169,8  | 174,5  |
| 1206063 | Krzeszowice (3)     | 223,9  | 223,9  | 225,2  | 225,3  | 225,1  | 224,5  | 224,9  | 225,3  | 225,6  | 224,9  | 225,5  | 226,4  | 227,5  | 228,8  | 229,4  | 232,1  |
| 1206072 | Liszki (2)          | 198,4  | 199,9  | 200,8  | 202,3  | 205,5  | 205,7  | 206,6  | 208,7  | 211,2  | 215,0  | 216,5  | 217,6  | 219,4  | 221,9  | 223,6  | 224,1  |
| 1206082 | Michałowice (2)     | 335,3  | 342,1  | 350,0  | 358,1  | 388,4  | 395,5  | 401,9  | 411,6  | 423,2  | 432,1  | 440,6  | 452,3  | 462,0  | 470,1  | 473,0  | 480,3  |
| 1206092 | Mogilany (2)        | 216,9  | 219,5  | 221,7  | 223,7  | 230,1  | 232,3  | 234,7  | 237,9  | 242,8  | 248,3  | 253,5  | 259,5  | 264,0  | 268,1  | 273,7  | 285,2  |
| 1206103 | Skała (3)           | 125,6  | 126,2  | 126,7  | 126,5  | 126,8  | 127,3  | 127,7  | 128,0  | 127,6  | 128,5  | 129,3  | 129,1  | 129,1  | 129,6  | 131,1  | 134,0  |
| 1206113 | Skawina (3)         | 408,0  | 410,9  | 411,7  | 413,6  | 410,2  | 410,5  | 410,3  | 410,6  | 411,3  | 411,9  | 413,7  | 415,5  | 415,5  | 417,7  | 420,1  | 427,6  |
| 1206123 | Słomniki (3)        | 124,1  | 124,4  | 124,0  | 124,0  | 122,4  | 123,0  | 122,0  | 122,1  | 122,0  | 122,0  | 121,9  | 120,4  | 120,5  | 120,9  | 121,5  | 122,3  |
| 1206132 | Sułoszowa (2)       | 112,8  | 112,7  | 112,2  | 112,4  | 111,1  | 111,0  | 110,5  | 110,8  | 110,9  | 110,6  | 110,2  | 110,2  | 109,7  | 110,6  | 110,7  | 109,3  |
| 1206143 | Świątniki Górne (3) | 404,2  | 408,4  | 412,2  | 416,6  | 414,6  | 417,4  | 420,1  | 418,5  | 421,6  | 424,5  | 426,2  | 425,6  | 429,9  | 432,0  | 435,9  | 456,0  |
| 1206152 | Wielka Wieś (2)     | 169,0  | 171,1  | 172,6  | 174,1  | 178,9  | 180,0  | 182,0  | 185,1  | 187,3  | 190,9  | 193,5  | 194,8  | 199,0  | 201,2  | 206,0  | 213,8  |
| 1206162 | Zabierzów (2)       | 205,1  | 205,8  | 207,6  | 209,7  | 211,2  | 212,9  | 214,5  | 217,0  | 219,4  | 221,0  | 223,5  | 226,9  | 228,8  | 232,6  | 235,5  | 242,7  |
| 1206172 | Zielonki (2)        | 246,5  | 252,0  | 256,8  | 261,1  | 285,2  | 289,3  | 293,8  | 301,2  | 310,9  | 318,3  | 323,1  | 326,2  | 334,0  | 345,2  | 359,2  | 378,8  |
| 1208022 | Gołcza (2)          | 76,1   | 75,7   | 75,5   | 74,9   | 71,4   | 71,1   | 71,1   | 71,1   | 70,9   | 70,0   | 69,5   | 69,3   | 69,3   | 68,8   | 68,5   | 69,4   |

|         |                     |        |        |        |        |        |        |        |        |        |        |        |        |        |        |        |        |
|---------|---------------------|--------|--------|--------|--------|--------|--------|--------|--------|--------|--------|--------|--------|--------|--------|--------|--------|
| 1209013 | Dobczyce (3)        | 192,7  | 194,6  | 198,5  | 199,7  | 200,8  | 202,8  | 203,3  | 204,5  | 205,8  | 206,9  | 208,6  | 211,6  | 213,9  | 216,2  | 218,2  | 221,3  |
| 1209022 | Lubień (2)          | 114,6  | 115,1  | 116,1  | 116,7  | 117,8  | 119,0  | 119,9  | 120,4  | 121,3  | 122,7  | 123,4  | 124,2  | 125,2  | 126,7  | 127,8  | 129,3  |
| 1209033 | Myślenice (3)       | 247,6  | 249,1  | 250,5  | 253,0  | 253,5  | 256,1  | 257,8  | 258,9  | 261,5  | 263,3  | 264,7  | 266,5  | 268,5  | 270,8  | 273,4  | 276,6  |
| 1209042 | Pcim (2)            | 109,7  | 110,7  | 111,6  | 112,3  | 112,3  | 112,8  | 113,9  | 114,6  | 114,8  | 115,4  | 116,1  | 116,2  | 116,9  | 117,7  | 118,9  | 121,1  |
| 1209052 | Raciechowice (2)    | 98,3   | 98,5   | 98,3   | 98,5   | 97,6   | 97,1   | 97,2   | 98,1   | 97,5   | 97,8   | 97,5   | 97,2   | 97,4   | 97,2   | 97,4   | 98,4   |
| 1209062 | Siepraw (2)         | 226,1  | 227,7  | 228,1  | 230,5  | 231,8  | 234,9  | 236,6  | 236,2  | 239,3  | 240,4  | 243,9  | 246,3  | 247,3  | 248,9  | 251,4  | 257,7  |
| 1209073 | Sułkowice (3)       | 210,9  | 213,0  | 216,0  | 217,0  | 217,2  | 218,5  | 219,8  | 220,9  | 222,9  | 225,3  | 227,1  | 229,1  | 230,9  | 232,4  | 233,8  | 236,7  |
| 1209082 | Tokarnia (2)        | 109,6  | 111,1  | 112,4  | 113,4  | 112,4  | 113,2  | 114,5  | 115,1  | 115,9  | 116,6  | 116,9  | 118,2  | 119,3  | 120,2  | 121,1  | 123,5  |
| 1209092 | Wiśniowa (2)        | 95,8   | 96,2   | 97,5   | 97,8   | 97,6   | 98,0   | 98,3   | 99,1   | 100,0  | 101,1  | 101,6  | 102,0  | 102,7  | 103,4  | 103,7  | 104,7  |
| 1212062 | Trzyciąż (2)        | 75,6   | 75,2   | 75,4   | 75,4   | 74,8   | 74,3   | 74,3   | 74,3   | 74,1   | 74,1   | 74,1   | 74,6   | 74,5   | 74,4   | 74,3   | 74,4   |
| 1214012 | Koniusza (2)        | 101,1  | 101,0  | 100,6  | 101,1  | 96,5   | 96,4   | 96,8   | 97,5   | 97,5   | 98,0   | 98,0   | 98,1   | 98,5   | 98,3   | 98,7   | 99,3   |
| 1214022 | Koszyce (2)         | 89,5   | 88,6   | 88,4   | 87,7   | 87,3   | 87,2   | 88,4   | 87,8   | 87,1   | 86,4   | 85,9   | 85,5   | 84,9   | 84,5   | 84,1   | 86,8   |
| 1214032 | Nowe Brzesko (2) *  | 106,2  | 106,3  | 105,9  | 105,2  | 105,1  | 106,0  | 105,7  | 105,7  | 105,5  | 106,2  | 106,0  | 106,1  | 105,9  | 105,5  | 106,5  | 106,4  |
| 1214053 | Proszowice (3)      | 171,1  | 171,8  | 172,4  | 171,8  | 165,6  | 165,2  | 164,8  | 164,3  | 163,9  | 163,1  | 162,3  | 162,0  | 161,7  | 161,8  | 162,0  | 165,1  |
| 1218022 | Brzeźnica (2)       | 140,1  | 139,6  | 139,8  | 141,1  | 141,4  | 142,1  | 142,6  | 143,4  | 143,4  | 144,4  | 145,4  | 149,3  | 148,6  | 149,1  | 147,2  | 149,0  |
| 1218033 | Kalwaria Zebrzydowa | 248,4  | 248,9  | 249,8  | 250,8  | 249,7  | 251,0  | 251,6  | 254,6  | 253,5  | 253,8  | 254,5  | 255,0  | 256,3  | 257,6  | 259,1  | 261,6  |
| 1218042 | Lanckorona (2)      | 142,5  | 143,7  | 144,5  | 146,0  | 140,3  | 140,1  | 140,8  | 141,4  | 141,7  | 142,5  | 143,3  | 144,1  | 145,1  | 146,0  | 146,3  | 151,1  |
| 1218072 | Stryszów (2)        | 144,5  | 144,9  | 145,3  | 144,4  | 143,0  | 144,4  | 144,5  | 144,9  | 145,6  | 145,5  | 146,0  | 145,5  | 145,4  | 144,8  | 145,1  | 147,8  |
| 1218093 | Wadowice (3)        | 323,2  | 324,4  | 325,7  | 326,6  | 328,0  | 328,6  | 329,5  | 330,8  | 331,6  | 332,4  | 333,0  | 333,3  | 333,8  | 335,8  | 336,6  | 337,2  |
| 1219012 | Biskupice (2)       | 192,4  | 194,4  | 195,7  | 197,1  | 200,4  | 203,0  | 204,9  | 206,4  | 207,9  | 209,1  | 210,6  | 211,3  | 212,4  | 215,0  | 218,4  | 224,9  |
| 1219022 | Gdów (2)            | 139,6  | 140,7  | 141,8  | 142,4  | 142,7  | 143,4  | 144,8  | 146,1  | 147,5  | 148,8  | 149,7  | 151,1  | 152,3  | 153,2  | 154,5  | 156,5  |
| 1219032 | Kłaj (2)            | 127,9  | 129,1  | 129,4  | 130,2  | 130,7  | 130,6  | 131,0  | 132,1  | 133,1  | 149,2  | 150,3  | 152,2  | 152,6  | 154,1  | 154,7  | 158,6  |
| 1219043 | Niepołomice (3)     | 212,1  | 213,4  | 215,7  | 217,0  | 221,7  | 223,1  | 224,4  | 226,2  | 227,6  | 230,4  | 232,3  | 232,0  | 236,3  | 240,1  | 244,0  | 251,0  |
| 1219053 | Wieliczka (3)       | 436,4  | 437,9  | 439,1  | 441,9  | 447,0  | 450,0  | 453,5  | 458,0  | 465,4  | 472,7  | 479,7  | 487,6  | 495,0  | 503,0  | 512,4  | 530,0  |
| 1261011 | Kraków (1)          | 2279,4 | 2266,2 | 2265,7 | 2266,1 | 2311,1 | 2321,4 | 2319,0 | 2317,8 | 2318,2 | 2317,4 | 2315,0 | 2314,2 | 2315,1 | 2309,1 | 2310,3 | 2318,7 |
| 1405011 | Milanówek (1)       | 1071,2 | 1080,5 | 1081,0 | 1089,5 | 1114,3 | 1120,6 | 1123,1 | 1127,8 | 1136,7 | 1146,2 | 1151,8 | 1174,4 | 1178,4 | 1179,9 | 1194,6 | 1215,3 |
| 1405021 | Podkowa Leśna (1)   | 362,8  | 365,0  | 365,0  | 362,5  | 366,2  | 370,3  | 364,8  | 372,4  | 375,6  | 376,8  | 375,9  | 379,5  | 377,3  | 378,7  | 379,3  | 390,0  |
| 1405032 | Baranów (2)         | 64,8   | 64,9   | 64,6   | 64,2   | 64,2   | 64,1   | 64,3   | 63,7   | 63,8   | 64,7   | 64,8   | 65,1   | 65,0   | 65,1   | 65,1   | 65,9   |
| 1405043 | Grodzisk Mazowiecki | 309,6  | 310,5  | 312,8  | 315,5  | 320,5  | 321,4  | 326,5  | 330,2  | 334,6  | 340,7  | 346,5  | 342,9  | 358,4  | 362,8  | 368,7  | 390,8  |
| 1405052 | Jaktorów (2)        | 160,0  | 160,3  | 161,0  | 163,4  | 170,1  | 171,2  | 172,5  | 174,3  | 175,3  | 178,9  | 181,0  | 184,3  | 186,6  | 189,8  | 191,2  | 194,9  |
| 1405062 | Żabia Wola (2)      | 50,4   | 50,7   | 51,1   | 51,5   | 53,6   | 54,6   | 55,6   | 56,5   | 57,8   | 58,4   | 59,6   | 62,4   | 62,4   | 63,9   | 66,2   | 69,8   |
| 1406032 | Chynów (2)          | 67,5   | 67,4   | 67,2   | 67,1   | 67,5   | 67,6   | 67,5   | 68,0   | 68,0   | 68,5   | 68,7   | 70,3   | 70,7   | 70,9   | 71,3   | 71,4   |
| 1406053 | Grójec (3)          | 188,3  | 189,0  | 187,8  | 188,8  | 185,0  | 185,2  | 186,1  | 187,3  | 189,2  | 190,5  | 191,1  | 191,2  | 193,5  | 195,3  | 196,5  | 203,9  |
| 1406092 | Pniewy (2)          | 44,3   | 44,0   | 44,5   | 44,4   | 44,9   | 44,8   | 44,7   | 44,5   | 44,6   | 44,9   | 45,0   | 45,0   | 45,0   | 45,2   | 45,5   | 45,9   |
| 1408011 | Legionowo (1)       | 3724,6 | 3734,1 | 3736,3 | 3749,4 | 3670,5 | 3696,2 | 3702,6 | 3710,6 | 3712,1 | 3720,6 | 3718,4 | 3769,1 | 3770,9 | 3799,6 | 3814,3 | 3946,1 |
| 1408022 | Jabłonna (2)        | 58,8   | 59,0   | 57,7   | 58,6   | 57,1   | 57,1   | 57,1   | 57,4   | 57,7   | 57,6   | 57,6   | 57,5   | 57,8   | 58,1   | 58,2   | 60,0   |
| 1408032 | Nieporęt (2)        | 91,1   | 93,9   | 95,0   | 97,6   | 115,4  | 116,7  | 118,4  | 120,5  | 122,9  | 125,8  | 127,3  | 130,5  | 134,4  | 129,5  | 132,7  | 133,9  |
| 1408043 | Serock (3)          | 90,5   | 90,9   | 90,7   | 92,1   | 96,9   | 98,3   | 99,9   | 100,3  | 100,4  | 101,6  | 102,4  | 104,1  | 105,9  | 108,9  | 111,7  | 116,0  |

|         |                      |        |        |        |        |        |        |        |        |        |        |        |        |        |        |        |        |
|---------|----------------------|--------|--------|--------|--------|--------|--------|--------|--------|--------|--------|--------|--------|--------|--------|--------|--------|
| 1408052 | Wieliszew (2) *      | 74,4   | 74,8   | 75,1   | 75,3   | 77,1   | 77,3   | 77,4   | 79,0   | 79,6   | 80,9   | 82,3   | 84,6   | 87,2   | 99,4   | 102,3  | 106,6  |
| 1412011 | Mińsk Mazowiecki (1) | 2674,9 | 2714,3 | 2731,6 | 2747,1 | 2704,0 | 2724,9 | 2754,2 | 2780,8 | 2804,2 | 2820,0 | 2856,4 | 2877,6 | 2881,9 | 2896,9 | 2911,2 | 2982,9 |
| 1412042 | Cegłów (2)           | 69,8   | 70,0   | 70,2   | 69,5   | 68,2   | 68,2   | 67,6   | 67,5   | 67,6   | 67,2   | 66,9   | 66,3   | 66,1   | 65,6   | 65,2   | 65,3   |
| 1412052 | Dębe Wielkie (2)     | 100,5  | 100,6  | 101,1  | 102,5  | 102,2  | 102,7  | 103,2  | 104,1  | 103,6  | 104,4  | 105,7  | 107,0  | 109,1  | 110,3  | 111,5  | 117,1  |
| 1412062 | Dobre (2)            | 49,8   | 49,6   | 49,3   | 49,0   | 48,3   | 48,3   | 48,2   | 48,0   | 48,0   | 47,8   | 47,7   | 47,5   | 47,6   | 47,4   | 47,4   | 48,3   |
| 1412073 | Halinów (3) *        | 164,4  | 165,5  | 166,4  | 168,9  | 179,3  | 181,7  | 182,8  | 186,0  | 190,5  | 192,6  | 197,6  | 201,7  | 209,8  | 215,3  | 218,7  | 224,5  |
| 1412082 | Jakubów (2)          | 59,0   | 58,3   | 58,6   | 58,2   | 58,2   | 58,3   | 58,0   | 57,6   | 57,1   | 56,6   | 56,7   | 57,0   | 57,2   | 57,4   | 57,4   | 58,1   |
| 1412093 | Kałużyn (3)          | 68,2   | 68,0   | 67,7   | 67,4   | 66,9   | 66,7   | 66,3   | 66,1   | 65,9   | 65,4   | 65,6   | 65,2   | 65,0   | 65,1   | 64,6   | 64,1   |
| 1412102 | Latowicz (2)         | 51,6   | 51,2   | 51,1   | 51,2   | 50,2   | 50,3   | 49,9   | 49,6   | 49,2   | 49,2   | 49,0   | 48,4   | 48,4   | 48,5   | 48,0   | 48,3   |
| 1412112 | Mińsk Mazowiecki (2) | 109,9  | 107,8  | 107,5  | 108,1  | 110,3  | 110,8  | 111,2  | 111,5  | 112,4  | 113,8  | 114,5  | 115,9  | 118,5  | 119,6  | 121,1  | 124,0  |
| 1412122 | Mrozy (2)            | 63,5   | 63,2   | 62,8   | 62,6   | 61,6   | 61,2   | 60,8   | 61,0   | 61,0   | 60,7   | 59,9   | 59,8   | 59,7   | 60,1   | 60,3   | 60,3   |
| 1412132 | Siennica (2)         | 66,0   | 65,7   | 65,4   | 65,4   | 64,6   | 64,1   | 63,9   | 63,8   | 63,0   | 63,0   | 62,5   | 62,3   | 62,7   | 63,2   | 63,6   | 65,9   |
| 1412142 | Stanisławów (2)      | 57,5   | 57,8   | 57,8   | 58,2   | 57,4   | 57,9   | 58,7   | 58,5   | 58,7   | 58,9   | 59,0   | 58,3   | 58,7   | 59,0   | 59,8   | 61,1   |
| 1412151 | Sulejówek (1) *      | 891,1  | 892,2  | 897,2  | 901,9  | 929,8  | 932,1  | 933,4  | 936,8  | 941,2  | 943,8  | 950,6  | 965,7  | 969,5  | 975,1  | 982,9  | 994,5  |
| 1414011 | Nowy Dwór Mazowiecki | 1116,6 | 1120,0 | 1122,7 | 1119,0 | 1106,6 | 1111,1 | 1107,1 | 972,2  | 970,3  | 973,0  | 974,1  | 974,5  | 974,3  | 979,1  | 983,1  | 997,2  |
| 1414022 | Czosnów (2)          | 60,7   | 60,6   | 60,2   | 60,5   | 64,1   | 64,6   | 65,4   | 66,0   | 66,5   | 67,2   | 67,7   | 68,3   | 69,5   | 70,1   | 71,2   | 73,3   |
| 1414032 | Leoncin (2)          | 31,4   | 31,4   | 31,4   | 31,4   | 32,0   | 32,1   | 31,9   | 32,0   | 32,1   | 32,0   | 32,0   | 32,4   | 32,7   | 32,8   | 32,9   | 33,8   |
| 1414052 | Pomiechówek (2)      | 85,2   | 85,2   | 85,2   | 85,2   | 86,7   | 87,0   | 86,8   | 86,5   | 85,9   | 86,2   | 86,2   | 86,3   | 86,6   | 86,5   | 86,9   | 86,9   |
| 1414063 | Zakroczym (3)        | 89,1   | 89,4   | 89,5   | 89,4   | 89,3   | 89,7   | 90,0   | 89,4   | 89,6   | 89,4   | 88,0   | 86,8   | 86,8   | 87,3   | 86,5   | 87,5   |
| 1417011 | Józefów (1)          | 605,8  | 608,1  | 610,3  | 618,0  | 678,3  | 689,6  | 697,2  | 715,6  | 728,1  | 744,9  | 759,1  | 778,3  | 793,0  | 812,0  | 826,5  | 810,7  |
| 1417021 | Otwock (1)           | 933,3  | 933,0  | 935,8  | 937,1  | 900,7  | 900,7  | 901,6  | 902,9  | 900,2  | 903,5  | 908,0  | 917,1  | 923,0  | 929,1  | 934,6  | 945,7  |
| 1417032 | Celestynów (2)       | 126,1  | 127,2  | 128,6  | 129,0  | 130,6  | 121,4  | 122,3  | 122,4  | 122,5  | 123,4  | 123,8  | 124,4  | 125,1  | 126,1  | 126,7  | 128,2  |
| 1417043 | Karczew (3)          | 198,3  | 198,8  | 197,8  | 196,7  | 200,6  | 200,0  | 199,6  | 198,0  | 196,9  | 195,5  | 195,9  | 195,1  | 196,1  | 196,0  | 195,6  | 196,2  |
| 1417052 | Kołbiel (2)          | 76,2   | 76,2   | 76,1   | 76,1   | 75,4   | 75,6   | 75,6   | 75,6   | 75,7   | 75,8   | 75,1   | 74,5   | 74,2   | 74,5   | 74,9   | 75,9   |
| 1417082 | Wiązowna (2)         | 78,0   | 78,9   | 79,0   | 79,1   | 89,4   | 90,1   | 90,8   | 91,6   | 92,9   | 94,5   | 95,9   | 97,8   | 100,0  | 102,2  | 105,2  | 106,8  |
| 1418013 | Góra Kalwaria (3)    | 157,2  | 157,5  | 158,5  | 159,4  | 162,3  | 162,6  | 163,0  | 162,8  | 163,3  | 164,2  | 165,4  | 167,7  | 168,9  | 170,4  | 172,2  | 176,0  |
| 1418023 | Konstancin-Jeziorna  | 282,9  | 284,6  | 287,8  | 291,3  | 285,1  | 286,9  | 286,9  | 289,2  | 291,7  | 293,6  | 296,1  | 297,0  | 299,1  | 301,3  | 302,9  | 316,1  |
| 1418032 | Lesznowola (2)       | 142,9  | 144,6  | 151,0  | 155,1  | 181,9  | 187,5  | 194,7  | 203,0  | 212,2  | 220,3  | 227,2  | 238,6  | 249,1  | 259,8  | 272,3  | 296,1  |
| 1418043 | Piaseczno (3)        | 309,4  | 311,9  | 319,3  | 326,4  | 395,9  | 406,8  | 418,2  | 434,5  | 450,0  | 463,5  | 479,8  | 497,6  | 516,4  | 531,2  | 545,5  | 559,1  |
| 1418052 | Prażmów (2)          | 78,8   | 79,4   | 80,7   | 82,0   | 88,6   | 89,6   | 90,7   | 91,8   | 94,3   | 96,5   | 98,0   | 99,6   | 102,4  | 104,6  | 106,8  | 110,7  |
| 1418063 | Tarczyn (3) *        | 85,3   | 85,5   | 85,8   | 86,1   | 89,3   | 89,2   | 89,6   | 89,2   | 89,8   | 91,2   | 91,9   | 92,4   | 92,8   | 93,4   | 93,7   | 96,7   |
| 1421011 | Piastów (1)          | 4067,4 | 4054,5 | 4068,4 | 4076,7 | 4001,0 | 4026,6 | 4036,0 | 4028,1 | 4012,7 | 4002,1 | 4001,9 | 4043,4 | 4027,6 | 4007,3 | 3996,2 | 3988,2 |
| 1421021 | Pruszków (1)         | 2764,6 | 2770,4 | 2784,0 | 2785,2 | 2830,2 | 2837,1 | 2846,4 | 2852,0 | 2857,8 | 2870,4 | 2884,8 | 2885,4 | 2898,4 | 2916,7 | 2945,0 | 3026,7 |
| 1421033 | Brwinów (3)          | 274,4  | 275,5  | 278,7  | 279,7  | 294,7  | 296,3  | 297,4  | 299,8  | 303,1  | 305,7  | 309,4  | 311,4  | 315,1  | 319,9  | 327,7  | 339,0  |
| 1421042 | Michałowice (2)      | 128,7  | 129,5  | 130,3  | 131,7  | 135,6  | 137,9  | 139,5  | 141,3  | 144,4  | 146,4  | 149,3  | 153,0  | 158,0  | 160,7  | 165,1  | 179,7  |
| 1421052 | Nadarzyn (2)         | 97,8   | 101,2  | 102,8  | 105,5  | 118,9  | 124,4  | 126,3  | 129,0  | 132,3  | 136,9  | 139,7  | 141,9  | 146,7  | 150,6  | 155,2  | 158,7  |
| 1421062 | Raszyn (2)           | 394,1  | 399,2  | 406,0  | 412,9  | 432,8  | 435,1  | 439,3  | 441,1  | 444,0  | 441,4  | 449,3  | 451,9  | 454,3  | 456,0  | 460,2  | 479,5  |
| 1428011 | Sochaczew (1)        | 1519,4 | 1527,1 | 1524,8 | 1524,2 | 1470,8 | 1472,9 | 1470,8 | 1469,1 | 1465,8 | 1462,0 | 1456,8 | 1448,1 | 1442,0 | 1438,1 | 1436,1 | 1458,9 |

|         |                     |        |        |        |        |        |        |        |        |        |        |        |        |        |        |        |        |
|---------|---------------------|--------|--------|--------|--------|--------|--------|--------|--------|--------|--------|--------|--------|--------|--------|--------|--------|
| 1428022 | Brochów (2) *       | 36,0   | 36,2   | 36,4   | 36,0   | 37,0   | 36,6   | 36,8   | 36,6   | 36,4   | 36,3   | 36,4   | 35,6   | 36,1   | 36,1   | 35,9   | 35,9   |
| 1428052 | Nowa Sucha (2)      | 65,2   | 65,3   | 65,6   | 65,7   | 64,1   | 64,8   | 64,7   | 64,8   | 65,2   | 65,4   | 66,0   | 66,4   | 67,0   | 67,6   | 68,5   | 69,8   |
| 1428072 | Sochaczew (2)       | 88,2   | 88,1   | 88,6   | 89,0   | 88,7   | 89,2   | 90,4   | 91,8   | 92,6   | 93,9   | 95,3   | 97,0   | 99,4   | 100,7  | 102,4  | 106,1  |
| 1428082 | Teresin (2)         | 121,3  | 120,8  | 120,6  | 121,4  | 125,2  | 125,4  | 125,6  | 125,0  | 125,7  | 126,3  | 125,7  | 126,5  | 128,1  | 126,8  | 127,4  | 128,5  |
| 1432013 | Błonie (3)          | 228,2  | 228,1  | 227,4  | 228,5  | 226,0  | 227,0  | 228,3  | 229,1  | 228,5  | 229,5  | 230,6  | 232,4  | 233,8  | 235,7  | 235,8  | 242,7  |
| 1432022 | Izabelin (2)        | 149,9  | 154,5  | 157,2  | 162,9  | 184,9  | 142,3  | 145,4  | 147,2  | 148,6  | 152,4  | 153,8  | 147,8  | 149,4  | 158,2  | 160,3  | 156,6  |
| 1432032 | Kampinos (2)        | 45,2   | 45,2   | 45,6   | 45,7   | 46,4   | 46,8   | 46,9   | 47,2   | 47,8   | 48,4   | 48,7   | 48,0   | 47,6   | 47,8   | 48,9   | 49,7   |
| 1432042 | Leszno (2)          | 62,8   | 63,0   | 63,2   | 63,1   | 64,5   | 64,6   | 64,8   | 65,6   | 66,5   | 68,5   | 69,8   | 71,0   | 71,6   | 72,0   | 72,3   | 77,5   |
| 1432053 | Łomianki (3)        | 407,2  | 415,5  | 428,6  | 438,2  | 494,1  | 504,5  | 516,8  | 528,2  | 542,3  | 558,6  | 572,1  | 570,6  | 587,8  | 596,3  | 605,1  | 612,8  |
| 1432063 | Ożarów Mazowiecki   | 263,3  | 263,5  | 264,5  | 264,3  | 284,7  | 286,4  | 287,3  | 288,7  | 289,5  | 290,9  | 290,3  | 292,5  | 294,2  | 293,9  | 297,4  | 299,2  |
| 1432072 | Stare Babice (2)    | 137,2  | 140,1  | 143,8  | 147,6  | 166,7  | 213,6  | 216,8  | 222,0  | 225,9  | 232,2  | 239,1  | 259,7  | 268,3  | 258,7  | 263,6  | 266,8  |
| 1434011 | Kobyłka (1)         | 778,8  | 790,1  | 800,1  | 811,5  | 846,7  | 850,4  | 850,1  | 857,6  | 868,2  | 877,1  | 887,1  | 921,8  | 940,5  | 965,8  | 982,2  | 1011,5 |
| 1434021 | Marki (1)           | 612,0  | 618,7  | 627,2  | 645,8  | 762,1  | 778,5  | 799,6  | 820,5  | 846,6  | 864,2  | 884,1  | 906,7  | 939,2  | 969,4  | 996,6  | 1027,4 |
| 1434031 | Ząbki (1)           | 1425,5 | 1440,4 | 1481,7 | 1516,3 | 1801,3 | 1883,7 | 1944,5 | 1993,6 | 2027,9 | 2091,4 | 2154,0 | 2246,9 | 2317,9 | 2406,1 | 2513,1 | 2602,6 |
| 1434041 | Zielonka (1)        | 194,2  | 195,3  | 196,4  | 198,1  | 205,4  | 208,3  | 210,4  | 213,2  | 215,4  | 215,5  | 217,0  | 216,9  | 218,4  | 218,2  | 219,1  | 219,1  |
| 1434052 | Dąbrówka (2)        | 59,7   | 60,1   | 60,5   | 60,2   | 61,0   | 61,1   | 61,8   | 62,0   | 62,3   | 62,8   | 63,0   | 63,9   | 64,4   | 65,2   | 66,9   | 69,2   |
| 1434072 | Klembów (2)         | 93,5   | 94,5   | 95,1   | 95,3   | 98,2   | 99,2   | 100,0  | 99,3   | 101,3  | 102,4  | 103,3  | 104,2  | 104,6  | 105,2  | 106,2  | 108,2  |
| 1434082 | Poświętne (2)       | 56,6   | 56,0   | 56,0   | 55,8   | 56,2   | 56,0   | 56,2   | 56,2   | 56,4   | 56,4   | 56,1   | 56,5   | 56,7   | 56,7   | 57,0   | 58,0   |
| 1434093 | Radzymin (3)        | 131,3  | 131,5  | 131,7  | 133,1  | 138,8  | 139,3  | 139,4  | 140,9  | 142,4  | 143,7  | 145,2  | 148,3  | 154,9  | 158,5  | 162,6  | 172,5  |
| 1434113 | Tłuszcz (3)         | 170,0  | 171,3  | 172,7  | 173,9  | 176,3  | 177,0  | 177,7  | 177,1  | 177,8  | 178,7  | 179,4  | 179,9  | 180,8  | 182,1  | 182,9  | 186,3  |
| 1434123 | Wołomin (3)         | 786,0  | 789,5  | 791,0  | 795,7  | 809,6  | 811,9  | 813,4  | 815,8  | 818,4  | 823,3  | 803,4  | 805,8  | 810,9  | 815,3  | 819,8  | 828,6  |
| 1435042 | Somianka (2)        | 50,3   | 50,3   | 50,0   | 50,1   | 48,4   | 48,2   | 48,2   | 47,9   | 47,8   | 47,6   | 47,2   | 46,8   | 46,5   | 46,4   | 46,4   | 47,4   |
| 1435053 | Wyszków (3)         | 216,6  | 218,3  | 220,3  | 221,8  | 220,3  | 222,4  | 223,3  | 224,8  | 226,2  | 227,7  | 228,5  | 232,4  | 233,6  | 234,6  | 233,3  | 235,6  |
| 1435062 | Zabrodzie (2)       | 62,5   | 62,3   | 62,4   | 62,6   | 61,7   | 61,6   | 61,4   | 61,2   | 60,5   | 60,0   | 60,2   | 60,2   | 60,5   | 60,6   | 60,6   | 62,3   |
| 1438011 | Żyrardów (1)        | 3035,7 | 3038,5 | 3040,3 | 3044,0 | 2920,9 | 2924,5 | 2914,6 | 2895,3 | 2895,7 | 2886,8 | 2873,4 | 2859,6 | 2860,8 | 2864,8 | 2867,1 | 2900,1 |
| 1438023 | Mszczonów (3)       | 76,3   | 76,2   | 75,9   | 76,0   | 74,8   | 74,6   | 74,9   | 75,4   | 75,4   | 75,2   | 73,6   | 73,7   | 73,9   | 74,2   | 74,7   | 75,8   |
| 1438032 | Puszcza Mariańska   | 56,6   | 56,4   | 56,3   | 56,1   | 58,3   | 59,0   | 58,6   | 59,1   | 59,2   | 59,2   | 59,0   | 58,8   | 59,0   | 59,1   | 59,3   | 58,5   |
| 1438042 | Radziejowice (2)    | 56,1   | 56,1   | 56,5   | 56,8   | 56,4   | 56,4   | 56,6   | 57,4   | 57,7   | 59,3   | 62,5   | 63,5   | 65,3   | 66,4   | 67,9   | 70,9   |
| 1438052 | Wiskitki (2)        | 62,0   | 62,1   | 62,0   | 62,2   | 61,9   | 61,4   | 61,5   | 61,6   | 61,7   | 61,5   | 61,7   | 62,1   | 62,7   | 62,9   | 63,1   | 65,5   |
| 1465011 | M.st.Warszawa (1) * | 3303,5 | 3294,7 | 3287,3 | 3274,4 | 3393,5 | 3383,5 | 3382,1 | 3266,0 | 3268,6 | 3275,0 | 3284,2 | 3290,9 | 3299,6 | 3305,6 | 3314,6 | 3286,9 |
| 2204011 | Pruszcz Gdański (1) | 1294,4 | 1303,6 | 1306,0 | 1310,6 | 1347,1 | 1358,0 | 1375,9 | 1390,2 | 1407,8 | 1428,6 | 1445,1 | 1474,0 | 1526,6 | 1555,9 | 1596,7 | 1680,5 |
| 2204022 | Cedry Wielkie (2)   | 47,7   | 47,9   | 48,1   | 48,6   | 47,7   | 48,1   | 48,5   | 48,4   | 48,7   | 49,2   | 49,3   | 49,5   | 50,6   | 51,1   | 51,5   | 54,1   |
| 2204032 | Kolbudy (2) *       | 95,8   | 96,7   | 97,4   | 98,9   | 115,3  | 119,4  | 123,9  | 128,3  | 132,3  | 137,4  | 142,3  | 148,5  | 155,9  | 159,0  | 164,6  | 172,5  |
| 2204042 | Pruszcz Gdański (2) | 90,6   | 93,1   | 95,8   | 98,4   | 101,7  | 103,7  | 105,6  | 107,5  | 110,4  | 114,1  | 117,5  | 119,6  | 124,5  | 129,3  | 134,8  | 147,0  |
| 2204052 | Przywidz (2)        | 39,4   | 39,7   | 39,8   | 40,3   | 38,4   | 38,4   | 38,7   | 39,2   | 38,9   | 39,0   | 39,7   | 39,8   | 40,0   | 40,4   | 40,8   | 43,4   |
| 2204062 | Pszczółki (2)       | 145,8  | 146,3  | 150,0  | 151,9  | 146,9  | 147,4  | 149,2  | 150,5  | 152,5  | 154,4  | 157,2  | 159,0  | 161,1  | 163,7  | 166,5  | 168,5  |
| 2204072 | Suchy Dąb (2)       | 43,7   | 43,9   | 43,7   | 43,4   | 44,5   | 44,4   | 45,1   | 44,9   | 44,5   | 44,4   | 44,9   | 45,7   | 46,1   | 46,6   | 47,0   | 49,0   |
| 2204082 | Trąbki Wielkie (2)  | 55,7   | 56,2   | 56,4   | 57,0   | 56,2   | 56,1   | 56,5   | 56,7   | 57,3   | 57,8   | 58,2   | 58,8   | 59,6   | 60,5   | 61,0   | 64,1   |

|         |                    |        |        |        |        |        |        |        |        |        |        |        |        |        |        |        |        |
|---------|--------------------|--------|--------|--------|--------|--------|--------|--------|--------|--------|--------|--------|--------|--------|--------|--------|--------|
| 2205012 | Chmielno (2)       | 73,4   | 74,4   | 75,6   | 76,4   | 77,3   | 78,4   | 79,1   | 79,5   | 79,9   | 80,6   | 81,8   | 83,2   | 83,9   | 84,8   | 86,4   | 89,4   |
| 2205023 | Kartuzy (3)        | 144,3  | 145,0  | 145,4  | 146,1  | 145,6  | 146,5  | 147,2  | 147,6  | 148,1  | 150,3  | 151,0  | 151,7  | 152,5  | 153,5  | 154,8  | 157,7  |
| 2205032 | Przodkowo (2)      | 70,0   | 71,0   | 72,1   | 72,8   | 74,3   | 75,4   | 76,5   | 77,7   | 79,2   | 79,5   | 80,7   | 81,9   | 83,6   | 85,1   | 86,9   | 92,3   |
| 2205042 | Sierakowice (2)    | 81,4   | 82,6   | 84,1   | 85,1   | 84,4   | 85,4   | 86,8   | 87,6   | 88,6   | 89,7   | 90,5   | 91,2   | 92,9   | 93,7   | 95,2   | 98,6   |
| 2205052 | Somonino (2)       | 72,6   | 73,7   | 75,1   | 76,0   | 75,5   | 77,1   | 77,7   | 78,9   | 79,7   | 80,8   | 81,6   | 81,9   | 83,6   | 84,9   | 85,4   | 87,6   |
| 2205062 | Stężycza (2)       | 47,6   | 48,3   | 48,6   | 49,2   | 49,9   | 50,4   | 51,0   | 51,8   | 52,4   | 53,3   | 54,2   | 54,8   | 55,5   | 56,3   | 57,3   | 59,4   |
| 2205072 | Sulęczyno (2)      | 34,5   | 34,9   | 35,2   | 35,6   | 34,8   | 35,1   | 35,4   | 35,7   | 36,0   | 36,5   | 36,9   | 37,2   | 37,6   | 38,1   | 38,2   | 38,8   |
| 2205083 | Żukowo (3)         | 115,5  | 117,9  | 121,2  | 123,7  | 132,1  | 134,3  | 136,6  | 140,5  | 144,2  | 148,1  | 152,5  | 157,1  | 163,9  | 169,7  | 175,0  | 180,9  |
| 2208011 | Lębork (1)         | 2033,4 | 2048,8 | 2066,1 | 2073,1 | 1983,0 | 1980,4 | 1975,4 | 1972,1 | 1968,3 | 1967,9 | 1966,4 | 1959,0 | 1948,8 | 1941,8 | 1940,5 | 2005,7 |
| 2208021 | Łeba (1)           | 275,8  | 275,0  | 276,2  | 278,3  | 260,1  | 262,6  | 259,8  | 263,0  | 263,4  | 260,6  | 259,0  | 260,0  | 255,6  | 253,0  | 253,1  | 264,1  |
| 2208032 | Cewice (2)         | 39,0   | 39,0   | 39,0   | 39,1   | 37,2   | 37,8   | 37,7   | 37,8   | 37,5   | 37,2   | 36,9   | 36,8   | 36,9   | 37,2   | 37,5   | 39,0   |
| 2208042 | Nowa Wieś Lęborsk  | 42,2   | 42,4   | 42,8   | 43,2   | 42,3   | 42,8   | 43,3   | 43,9   | 44,4   | 44,9   | 45,6   | 46,0   | 46,5   | 47,0   | 47,0   | 48,8   |
| 2208052 | Wicko (2)          | 24,6   | 24,5   | 24,7   | 25,1   | 24,9   | 25,0   | 25,1   | 25,1   | 25,3   | 25,3   | 25,4   | 25,6   | 26,1   | 26,2   | 26,7   | 27,5   |
| 2209011 | Malbork (1)        | 2343,3 | 2349,7 | 2349,4 | 2347,3 | 2253,6 | 2250,1 | 2248,0 | 2253,9 | 2241,5 | 2259,3 | 2246,5 | 2231,7 | 2224,7 | 2223,5 | 2230,3 | 2295,6 |
| 2209032 | Lichnowy (2)       | 52,6   | 53,2   | 53,1   | 53,2   | 51,6   | 51,9   | 51,8   | 51,3   | 51,6   | 51,8   | 51,9   | 51,8   | 52,1   | 52,3   | 52,0   | 54,3   |
| 2209042 | Malbork (2)        | 38,5   | 38,9   | 39,0   | 39,5   | 38,4   | 38,6   | 38,8   | 39,8   | 40,0   | 39,5   | 39,8   | 40,3   | 40,8   | 41,1   | 42,3   | 44,6   |
| 2209062 | Miłoradz (2)       | 37,4   | 37,2   | 37,3   | 37,2   | 36,7   | 37,0   | 37,0   | 36,9   | 37,0   | 36,6   | 36,6   | 36,6   | 36,3   | 35,8   | 35,5   | 36,4   |
| 2209073 | Nowy Staw (3)      | 73,0   | 73,0   | 73,2   | 73,3   | 69,4   | 69,4   | 69,5   | 69,2   | 68,9   | 68,2   | 68,7   | 68,8   | 68,2   | 68,0   | 67,6   | 70,0   |
| 2209082 | Stare Pole (2)     | 56,2   | 56,3   | 56,9   | 57,2   | 56,3   | 56,7   | 56,7   | 57,3   | 57,4   | 57,4   | 57,7   | 58,0   | 57,8   | 58,1   | 58,2   | 59,6   |
| 2210011 | Krynica Morska (1) | 12,5   | 12,5   | 12,4   | 12,6   | 12,6   | 12,6   | 12,7   | 12,9   | 12,9   | 12,9   | 13,4   | 12,0   | 11,8   | 11,6   | 11,7   | 11,7   |
| 2210023 | Nowy Dwór Gdańsk   | 86,6   | 87,2   | 87,6   | 87,9   | 84,2   | 84,3   | 84,5   | 84,1   | 84,3   | 84,1   | 84,0   | 83,6   | 83,9   | 84,0   | 83,9   | 85,9   |
| 2210032 | Ostaszewo (2)      | 54,9   | 55,3   | 55,0   | 55,1   | 54,2   | 55,0   | 54,8   | 54,4   | 54,6   | 54,1   | 53,1   | 53,1   | 52,9   | 53,0   | 52,9   | 54,0   |
| 2210042 | Stegna (2)         | 56,1   | 56,6   | 56,6   | 57,3   | 55,1   | 55,3   | 55,8   | 56,2   | 56,3   | 56,2   | 56,3   | 56,0   | 56,2   | 56,6   | 56,6   | 58,4   |
| 2210052 | Sztutowo (2)       | 34,2   | 33,9   | 34,1   | 34,4   | 33,3   | 33,2   | 33,5   | 33,5   | 33,4   | 33,0   | 32,9   | 31,7   | 31,6   | 31,5   | 31,9   | 32,7   |
| 2211011 | Hel (1)            | 223,7  | 220,2  | 218,1  | 217,9  | 206,8  | 207,9  | 205,1  | 201,6  | 200,9  | 194,5  | 186,0  | 180,5  | 175,6  | 173,4  | 172,3  | 181,6  |
| 2211031 | Puck (1)           | 2362,2 | 2373,3 | 2375,3 | 2360,2 | 2310,8 | 2288,0 | 2301,4 | 2313,9 | 2304,9 | 2314,1 | 2310,0 | 2364,9 | 2368,1 | 2367,0 | 2360,5 | 2410,6 |
| 2211041 | Władysławowo (1)   | 375,7  | 378,8  | 381,1  | 383,8  | 372,8  | 376,2  | 379,6  | 382,6  | 383,3  | 384,8  | 385,1  | 381,0  | 381,1  | 381,7  | 384,0  | 390,2  |
| 2211052 | Kosakowo (2)       | 96,4   | 96,1   | 98,1   | 100,1  | 132,1  | 132,3  | 139,7  | 146,7  | 142,0  | 152,1  | 157,5  | 166,0  | 176,6  | 180,4  | 186,8  | 201,3  |
| 2211062 | Krokowa (2)        | 45,5   | 45,7   | 46,1   | 46,4   | 45,4   | 45,7   | 46,2   | 46,6   | 46,7   | 47,0   | 47,5   | 48,0   | 48,5   | 49,0   | 49,0   | 49,6   |
| 2211072 | Puck (2)           | 80,4   | 81,6   | 82,4   | 79,8   | 82,1   | 83,0   | 83,7   | 84,5   | 86,1   | 87,5   | 89,3   | 90,9   | 92,7   | 94,5   | 96,8   | 100,4  |
| 2214011 | Tczew (1)          | 2723,0 | 2730,6 | 2739,0 | 2741,6 | 2680,5 | 2685,7 | 2692,5 | 2693,4 | 2698,4 | 2701,2 | 2706,4 | 2692,4 | 2691,9 | 2685,1 | 2694,0 | 2724,8 |
| 2214023 | Gniew (3)          | 83,8   | 83,9   | 83,8   | 84,2   | 80,7   | 80,3   | 81,0   | 80,5   | 80,6   | 79,9   | 79,8   | 79,9   | 80,0   | 80,0   | 79,6   | 82,8   |
| 2214032 | Morzeszczyn (2)    | 41,9   | 42,5   | 43,0   | 42,9   | 41,0   | 41,0   | 41,4   | 41,4   | 41,6   | 41,6   | 41,6   | 41,9   | 42,1   | 41,9   | 41,7   | 41,1   |
| 2214043 | Pelplin (3)        | 116,9  | 117,3  | 118,4  | 118,0  | 116,3  | 116,9  | 117,0  | 118,1  | 117,8  | 118,2  | 117,8  | 117,3  | 117,8  | 117,7  | 118,1  | 118,7  |
| 2214052 | Subkowy (2)        | 63,5   | 63,3   | 64,2   | 64,3   | 63,7   | 64,2   | 64,5   | 65,2   | 65,6   | 66,3   | 66,7   | 67,5   | 67,9   | 68,4   | 68,9   | 69,2   |
| 2214062 | Tczew (2)          | 61,1   | 61,5   | 62,0   | 62,4   | 61,9   | 62,4   | 62,8   | 63,7   | 64,3   | 65,3   | 65,4   | 66,4   | 68,0   | 69,2   | 70,4   | 74,8   |
| 2215011 | Reda (1)           | 573,6  | 584,4  | 599,5  | 587,0  | 577,4  | 582,5  | 590,4  | 595,1  | 606,7  | 615,0  | 623,4  | 629,4  | 644,5  | 662,6  | 682,5  | 615,0  |
| 2215021 | Rumia (1)          | 1338,1 | 1362,8 | 1377,5 | 1392,9 | 1412,5 | 1430,2 | 1335,0 | 1339,0 | 1466,9 | 1468,0 | 1477,9 | 1480,6 | 1488,7 | 1498,7 | 1518,1 | 1547,6 |

|         |                           |        |        |        |        |        |        |        |        |        |        |        |        |        |        |        |        |
|---------|---------------------------|--------|--------|--------|--------|--------|--------|--------|--------|--------|--------|--------|--------|--------|--------|--------|--------|
| 2215031 | Wejherowo (1)             | 1855,1 | 1846,3 | 1841,0 | 1838,7 | 1753,2 | 1752,4 | 1754,9 | 1745,1 | 1736,1 | 1741,0 | 1753,5 | 1783,1 | 1796,7 | 1824,5 | 1848,3 | 1953,4 |
| 2215042 | Choczewo (2)              | 30,4   | 30,6   | 30,5   | 30,2   | 29,4   | 29,5   | 30,2   | 30,1   | 29,9   | 30,3   | 30,0   | 30,2   | 30,3   | 30,6   | 30,6   | 31,1   |
| 2215052 | Gniewino (2)              | 34,9   | 34,9   | 35,8   | 36,2   | 36,6   | 36,9   | 37,1   | 37,5   | 37,8   | 38,0   | 38,5   | 38,9   | 39,1   | 39,5   | 40,1   | 40,5   |
| 2215062 | Linia (2)                 | 44,4   | 44,8   | 45,1   | 45,4   | 45,6   | 45,9   | 46,0   | 46,3   | 47,2   | 47,7   | 48,2   | 48,2   | 48,7   | 49,0   | 49,2   | 49,9   |
| 2215072 | Luzino (2)                | 89,5   | 91,9   | 93,9   | 96,2   | 99,8   | 101,8  | 104,0  | 106,5  | 109,0  | 111,4  | 113,8  | 117,1  | 120,0  | 122,4  | 124,6  | 127,4  |
| 2215082 | Łęczyce (2)               | 44,7   | 45,3   | 45,4   | 45,6   | 45,8   | 46,3   | 46,5   | 47,1   | 47,3   | 47,5   | 48,0   | 48,0   | 48,5   | 49,1   | 49,6   | 50,4   |
| 2215092 | Szemud (2)                | 56,1   | 57,1   | 58,1   | 58,9   | 60,9   | 62,2   | 63,3   | 64,6   | 66,9   | 69,3   | 71,3   | 73,1   | 75,6   | 78,3   | 81,1   | 84,9   |
| 2215102 | Wejherowo (2)             | 67,0   | 68,6   | 69,9   | 71,5   | 77,3   | 79,4   | 81,1   | 83,2   | 86,9   | 91,4   | 94,5   | 98,1   | 101,9  | 104,6  | 107,8  | 109,7  |
| 2261011 | Gdańsk (1)                | 1767,0 | 1764,4 | 1760,7 | 1751,7 | 1772,2 | 1767,0 | 1762,7 | 1761,8 | 1759,4 | 1752,0 | 1748,1 | 1720,0 | 1741,9 | 1741,4 | 1744,8 | 1757,9 |
| 2262011 | Gdynia (1)                | 1857,2 | 1859,4 | 1856,9 | 1871,1 | 1867,2 | 1870,2 | 1870,0 | 1871,0 | 1871,0 | 1869,7 | 1865,8 | 1863,6 | 1851,7 | 1844,4 | 1834,1 | 1845,9 |
| 2264011 | Sopot (1)                 | 2517,4 | 2504,9 | 2485,6 | 2471,5 | 2476,4 | 2446,4 | 2428,4 | 2392,3 | 2369,6 | 2342,4 | 2315,1 | 2283,8 | 2258,0 | 2238,8 | 2225,7 | 2248,7 |
| 3003011 | Gnieszno (1)              | 1737,2 | 1737,4 | 1741,2 | 1747,0 | 1712,3 | 1714,7 | 1713,9 | 1716,8 | 1715,4 | 1717,2 | 1715,5 | 1723,4 | 1717,5 | 1717,7 | 1713,2 | 1733,1 |
| 3003023 | Czarniejewo (3)           | 59,4   | 59,2   | 58,7   | 58,5   | 61,2   | 61,6   | 61,7   | 61,5   | 61,4   | 61,4   | 61,5   | 61,9   | 62,3   | 62,6   | 62,8   | 64,1   |
| 3003032 | Gnieszno (2)              | 42,1   | 42,4   | 42,6   | 42,9   | 42,8   | 42,8   | 43,3   | 43,9   | 44,6   | 45,2   | 46,4   | 47,3   | 49,3   | 50,7   | 52,4   | 54,8   |
| 3003042 | Kiszkowo (2)              | 46,7   | 46,6   | 46,5   | 46,6   | 46,2   | 46,0   | 46,3   | 46,2   | 46,3   | 46,4   | 45,8   | 45,8   | 46,2   | 46,3   | 46,6   | 46,9   |
| 3003062 | Łubowo (2)                | 44,4   | 44,8   | 45,0   | 45,0   | 44,5   | 44,6   | 45,0   | 45,3   | 45,7   | 46,5   | 46,9   | 47,7   | 48,4   | 49,5   | 50,2   | 52,2   |
| 3005012 | Granowo (2)               | 72,5   | 72,5   | 73,4   | 72,7   | 70,8   | 70,3   | 70,6   | 71,4   | 71,3   | 71,6   | 71,7   | 74,1   | 74,1   | 74,3   | 74,2   | 74,9   |
| 3005023 | Grodzisk Wielkopolski (2) | 134,8  | 136,0  | 136,4  | 137,7  | 136,1  | 136,2  | 136,7  | 137,8  | 138,2  | 138,0  | 138,2  | 140,8  | 141,4  | 142,4  | 143,1  | 145,1  |
| 3011011 | Kościan (1)               | 2806,6 | 2800,0 | 2798,6 | 2798,7 | 2774,7 | 2769,1 | 2756,6 | 2755,8 | 2755,8 | 2752,6 | 2756,7 | 2746,2 | 2746,1 | 2734,9 | 2736,4 | 2754,9 |
| 3011023 | Czempiń (3)               | 79,0   | 79,5   | 79,8   | 79,6   | 79,0   | 79,2   | 79,3   | 79,3   | 79,1   | 78,9   | 78,9   | 78,9   | 79,5   | 79,6   | 79,5   | 80,0   |
| 3011032 | Kościan (2)               | 71,6   | 72,2   | 72,2   | 72,6   | 71,4   | 72,1   | 72,5   | 72,6   | 73,4   | 73,8   | 73,9   | 74,3   | 74,5   | 75,3   | 75,6   | 76,5   |
| 3015043 | Nowy Tomyśl (3)           | 125,0  | 126,1  | 126,6  | 126,9  | 127,2  | 127,4  | 128,4  | 128,3  | 128,9  | 129,3  | 130,0  | 130,4  | 131,3  | 132,7  | 133,4  | 135,4  |
| 3015053 | Opalenica (3)             | 105,0  | 105,3  | 105,8  | 106,1  | 104,8  | 105,4  | 105,5  | 105,5  | 105,3  | 105,6  | 105,6  | 105,0  | 105,0  | 105,5  | 105,8  | 107,7  |
| 3016013 | Oborniki (3)              | 88,4   | 88,7   | 89,0   | 89,8   | 90,5   | 90,9   | 91,7   | 91,6   | 91,8   | 92,1   | 92,8   | 93,0   | 93,6   | 94,4   | 94,8   | 96,4   |
| 3016023 | Rogoźno (3)               | 79,0   | 79,6   | 80,2   | 80,5   | 78,6   | 79,3   | 79,3   | 78,9   | 79,1   | 79,2   | 79,2   | 80,0   | 80,2   | 80,7   | 81,2   | 83,8   |
| 3021011 | Luboń (1)                 | 1532,2 | 1555,5 | 1573,0 | 1610,1 | 1705,8 | 1744,7 | 1803,9 | 1844,2 | 1893,0 | 1934,6 | 1971,5 | 2009,0 | 2069,4 | 2111,3 | 2147,2 | 2203,0 |
| 3021021 | Puszczykowo (1)           | 494,1  | 499,2  | 517,6  | 524,2  | 537,4  | 539,5  | 537,0  | 542,7  | 543,6  | 551,2  | 555,4  | 580,3  | 589,4  | 589,0  | 594,4  | 604,2  |
| 3021033 | Buk (3)                   | 126,7  | 127,4  | 127,5  | 128,6  | 127,7  | 128,7  | 129,7  | 130,3  | 130,7  | 131,0  | 131,4  | 131,6  | 133,0  | 133,7  | 133,8  | 134,9  |
| 3021042 | Czerwonak (2)             | 236,7  | 241,0  | 244,7  | 249,0  | 255,5  | 261,7  | 265,3  | 268,9  | 274,6  | 279,7  | 285,5  | 289,9  | 297,3  | 303,8  | 308,6  | 315,2  |
| 3021052 | Dopiewo (2)               | 83,7   | 84,3   | 86,0   | 88,2   | 96,4   | 99,0   | 101,2  | 104,6  | 109,0  | 116,8  | 124,5  | 132,9  | 141,3  | 149,1  | 158,1  | 169,3  |
| 3021062 | Kleszczewo (2)            | 56,2   | 56,4   | 56,9   | 57,6   | 60,9   | 62,7   | 66,1   | 67,1   | 67,9   | 69,2   | 70,6   | 74,1   | 76,8   | 78,5   | 80,6   | 82,8   |
| 3021072 | Komorniki (2)             | 157,8  | 160,4  | 161,3  | 163,1  | 173,3  | 175,5  | 180,9  | 187,4  | 193,2  | 200,3  | 210,2  | 222,3  | 238,8  | 255,1  | 274,4  | 297,1  |
| 3021083 | Kostrzyn (3)              | 95,7   | 95,7   | 95,9   | 95,1   | 97,9   | 98,2   | 98,0   | 98,3   | 99,2   | 99,2   | 99,9   | 100,5  | 102,3  | 104,2  | 105,8  | 110,2  |
| 3021093 | Kórnik (3)                | 76,2   | 76,7   | 77,1   | 77,9   | 78,9   | 80,2   | 81,5   | 83,7   | 86,1   | 88,7   | 92,2   | 96,8   | 101,3  | 104,5  | 107,9  | 112,7  |
| 3021103 | Mosina (3)                | 134,2  | 134,9  | 135,8  | 137,0  | 136,6  | 137,9  | 139,1  | 140,7  | 142,7  | 144,7  | 146,1  | 147,2  | 149,6  | 152,2  | 155,1  | 161,7  |
| 3021113 | Murowana Goślina (3)      | 85,8   | 85,9   | 86,7   | 87,5   | 87,2   | 87,8   | 88,2   | 88,8   | 89,6   | 90,2   | 91,2   | 91,6   | 93,0   | 93,9   | 94,3   | 95,3   |
| 3021123 | Pobiedziska (3)           | 75,4   | 76,6   | 77,3   | 78,1   | 79,0   | 79,5   | 80,5   | 81,5   | 82,7   | 84,2   | 85,7   | 87,0   | 89,3   | 90,9   | 92,9   | 95,7   |
| 3021132 | Rokietnica (2)            | 87,1   | 87,9   | 89,4   | 91,5   | 96,5   | 97,5   | 99,6   | 101,4  | 105,3  | 109,8  | 116,2  | 122,1  | 129,9  | 137,9  | 147,5  | 158,0  |

|         |                    |        |        |        |        |        |        |        |        |        |        |        |        |        |        |        |        |
|---------|--------------------|--------|--------|--------|--------|--------|--------|--------|--------|--------|--------|--------|--------|--------|--------|--------|--------|
| 3021143 | Stęszew (3)        | 73,5   | 73,7   | 74,4   | 75,0   | 76,1   | 76,6   | 77,1   | 77,4   | 78,0   | 78,4   | 79,0   | 79,9   | 80,9   | 81,6   | 82,5   | 82,6   |
| 3021152 | Suchy Las (2)      | 70,2   | 71,0   | 72,9   | 74,5   | 83,9   | 86,9   | 90,8   | 95,7   | 100,2  | 104,3  | 110,7  | 116,0  | 119,6  | 123,9  | 127,0  | 127,8  |
| 3021163 | Swarzędz (3)       | 340,0  | 345,0  | 348,5  | 353,6  | 354,0  | 358,0  | 364,3  | 369,2  | 375,0  | 384,8  | 393,8  | 400,5  | 405,5  | 413,9  | 420,9  | 436,1  |
| 3021172 | Tarnowo Podgórne   | 133,0  | 134,6  | 137,1  | 136,1  | 155,6  | 159,2  | 162,1  | 165,6  | 169,7  | 175,0  | 181,9  | 186,4  | 193,7  | 200,0  | 206,8  | 213,0  |
| 3024022 | Duszniki (2)       | 51,4   | 51,6   | 51,6   | 52,0   | 51,7   | 51,7   | 51,6   | 51,7   | 52,1   | 51,9   | 52,2   | 52,2   | 52,5   | 53,1   | 53,7   | 54,2   |
| 3024032 | Kaźmierz (2)       | 51,9   | 52,4   | 52,7   | 52,9   | 53,1   | 53,5   | 54,0   | 54,6   | 55,3   | 55,5   | 56,2   | 56,9   | 57,6   | 58,0   | 58,7   | 59,6   |
| 3024073 | Szamotuły (3)      | 161,3  | 161,8  | 162,3  | 162,4  | 162,0  | 162,4  | 161,7  | 162,0  | 162,0  | 162,7  | 163,1  | 162,6  | 163,7  | 164,2  | 165,1  | 167,2  |
| 3025012 | Dominowo (2)       | 36,0   | 36,2   | 36,0   | 35,8   | 36,1   | 36,2   | 36,2   | 36,3   | 35,9   | 36,0   | 35,7   | 35,9   | 36,2   | 36,5   | 37,2   | 37,0   |
| 3025043 | Środa Wielkopolska | 144,4  | 145,0  | 145,2  | 145,9  | 143,8  | 144,2  | 144,4  | 144,8  | 144,8  | 144,9  | 144,9  | 145,1  | 145,5  | 145,7  | 146,7  | 148,9  |
| 3025052 | Zaniemyśl (2)      | 57,2   | 57,7   | 58,1   | 58,1   | 56,8   | 56,9   | 57,0   | 57,3   | 57,5   | 57,7   | 58,0   | 58,2   | 58,7   | 58,9   | 59,0   | 61,3   |
| 3026012 | Brodnica (2)       | 47,7   | 47,5   | 48,0   | 48,6   | 50,2   | 49,8   | 49,4   | 48,8   | 48,9   | 48,7   | 48,4   | 48,0   | 48,6   | 48,4   | 48,6   | 51,2   |
| 3026043 | Śrem (3)           | 188,4  | 189,7  | 190,6  | 191,3  | 188,6  | 189,7  | 190,4  | 191,5  | 192,0  | 192,3  | 193,3  | 193,9  | 193,8  | 194,9  | 196,0  | 199,5  |
| 3028011 | Wągrowiec (1)      | 1688,5 | 1357,5 | 1357,3 | 1359,7 | 1352,8 | 1357,5 | 1357,5 | 1362,4 | 1365,9 | 1369,6 | 1372,1 | 1389,0 | 1390,2 | 1399,2 | 1402,4 | 1421,1 |
| 3028053 | Skoki (3)          | 43,0   | 42,9   | 43,0   | 43,1   | 42,4   | 42,5   | 42,9   | 42,9   | 43,2   | 43,6   | 44,0   | 44,2   | 44,3   | 44,5   | 45,1   | 45,7   |
| 3028072 | Wągrowiec (2)      | 32,2   | 32,4   | 32,7   | 32,7   | 31,6   | 31,6   | 32,0   | 32,3   | 32,4   | 32,4   | 32,6   | 32,7   | 32,8   | 33,0   | 33,3   | 33,7   |
| 3030033 | Nekla (3) *        | 66,4   | 66,3   | 66,7   | 67,6   | 66,3   | 67,0   | 67,2   | 67,5   | 67,9   | 68,6   | 68,7   | 69,3   | 70,2   | 70,9   | 71,9   | 73,7   |
| 3030053 | Września (3)       | 194,4  | 195,3  | 195,8  | 196,8  | 194,0  | 193,8  | 194,3  | 194,7  | 195,1  | 195,9  | 196,3  | 197,2  | 198,3  | 199,3  | 200,1  | 203,5  |
| 3064011 | Poznań (1)         | 2224,1 | 2222,8 | 2219,8 | 2212,8 | 2235,9 | 2228,2 | 2217,1 | 2208,6 | 2197,1 | 2184,3 | 2172,7 | 2157,5 | 2142,2 | 2128,2 | 2116,6 | 2121,9 |

Source: data from Poland's Central Statistical Office (GUS)
