# Supplementary material
Source: MDPI journal article supplement (https://www.mdpi.com/2071-1050/10/3/837)
Supplement: s1 [file s1]

| KOD GUS | Municipality         | Economic entities employing over 50 people for 2002–2010 [entities/ 10 thous. population of working age] |      |      |      |      |      |      |      |      |
|---------|----------------------|----------------------------------------------------------------------------------------------------------|------|------|------|------|------|------|------|------|
|         |                      | 2002                                                                                                     | 2003 | 2004 | 2005 | 2006 | 2007 | 2008 | 2009 | 2010 |
| 0214011 | Oleśnica (1)         | 12,2                                                                                                     | 12,5 | 12,0 | 12,9 | 12,5 | 11,7 | 12,9 | 12,6 | 12,2 |
| 0214032 | Dobroszyce (2)       | 5,5                                                                                                      | 2,7  | 2,6  | 5,2  | 5,1  | 5,0  | 5,0  | 2,5  | 2,4  |
| 0214062 | Oleśnica (2)         | 8,8                                                                                                      | 8,6  | 9,8  | 9,6  | 8,1  | 8,0  | 7,8  | 6,4  | 7,3  |
| 0215011 | Oława (1)            | 17,4                                                                                                     | 16,4 | 16,9 | 17,0 | 17,6 | 16,3 | 16,9 | 19,1 | 18,7 |
| 0215022 | Domaniów (2)         | 3,1                                                                                                      | 3,1  | 0,0  | 0,0  | 0,0  | 0,0  | 0,0  | 0,0  | 0,0  |
| 0215033 | Jelcz-Laskowice (3)  | 12,6                                                                                                     | 14,4 | 16,8 | 18,0 | 17,1 | 16,3 | 16,1 | 15,4 | 16,3 |
| 0215042 | Oława (2)            | 2,6                                                                                                      | 3,7  | 2,4  | 4,7  | 4,6  | 5,7  | 7,8  | 7,6  | 7,3  |
| 0217012 | Borów (2)            | 3,1                                                                                                      | 6,2  | 9,2  | 6,1  | 6,1  | 6,1  | 3,0  | 6,0  | 5,9  |
| 0218012 | Kostomłoty (2)       | 4,7                                                                                                      | 4,7  | 4,6  | 4,6  | 4,5  | 4,5  | 4,4  | 4,4  | 4,2  |
| 0218032 | Miękinia (2)         | 10,1                                                                                                     | 11,2 | 9,5  | 9,4  | 7,8  | 7,6  | 11,2 | 12,1 | 11,3 |
| 0218043 | Środa Śląska (3)     | 14,9                                                                                                     | 9,8  | 11,3 | 13,6 | 13,5 | 14,3 | 17,4 | 18,1 | 17,1 |
| 0220013 | Oborniki Śląskie (3) | 9,9                                                                                                      | 8,9  | 9,6  | 10,3 | 9,4  | 9,2  | 10,8 | 11,5 | 12,8 |
| 0220023 | Prusice (3) *        | 3,5                                                                                                      | 1,7  | 3,4  | 1,7  | 1,7  | 1,7  | 1,6  | 1,6  | 3,2  |
| 0220033 | Trzebnica (3)        | 18,2                                                                                                     | 14,3 | 16,2 | 15,4 | 14,5 | 14,4 | 15,1 | 15,6 | 15,3 |
| 0220042 | Wisznia Mała (2)     | 4,0                                                                                                      | 2,0  | 3,9  | 5,7  | 5,5  | 5,3  | 5,2  | 5,1  | 4,8  |
| 0220052 | Zawonia (2)          | 3,1                                                                                                      | 3,0  | 2,9  | 2,9  | 2,8  | 2,8  | 2,7  | 2,7  | 2,6  |
| 0222013 | Brzeg Dolny (3)      | 24,0                                                                                                     | 24,7 | 21,7 | 18,8 | 17,9 | 16,8 | 16,8 | 16,8 | 15,6 |
| 0223012 | Czernica (2)         | 1,9                                                                                                      | 1,8  | 1,8  | 1,7  | 1,6  | 1,5  | 2,9  | 2,8  | 2,6  |
| 0223022 | Długołęka (2)        | 8,3                                                                                                      | 8,0  | 6,8  | 4,4  | 5,0  | 2,7  | 6,7  | 8,5  | 8,8  |
| 0223032 | Jordanów Śląski (2)  | 0,0                                                                                                      | 5,5  | 5,4  | 5,2  | 0,0  | 0,0  | 0,0  | 0,0  | 0,0  |
| 0223043 | Kąty Wrocławskie (3) | 16,1                                                                                                     | 16,7 | 14,4 | 13,2 | 12,8 | 14,1 | 18,6 | 19,0 | 17,4 |
| 0223052 | Kobierzyce (2)       | 12,9                                                                                                     | 12,5 | 15,8 | 17,6 | 24,3 | 29,7 | 37,5 | 42,3 | 43,1 |
| 0223062 | Mietków (2)          | 0,0                                                                                                      | 0,0  | 0,0  | 0,0  | 0,0  | 0,0  | 4,0  | 4,0  | 4,0  |
| 0223073 | Sobótka (3)          | 6,6                                                                                                      | 6,4  | 7,6  | 7,5  | 7,4  | 7,4  | 7,3  | 7,3  | 7,2  |
| 0223083 | Siechnice (3) *      | 7,3                                                                                                      | 9,5  | 9,2  | 10,1 | 9,7  | 11,4 | 12,1 | 11,7 | 10,9 |
| 0223092 | Żórawina (2)         | 2,1                                                                                                      | 2,0  | 2,0  | 1,9  | 5,7  | 3,7  | 1,8  | 1,7  | 1,6  |
| 0264011 | Wrocław (1)          | 18,4                                                                                                     | 17,6 | 17,6 | 17,8 | 17,4 | 18,0 | 19,0 | 19,4 | 19,5 |
| 0608011 | Lubartów (1)         | 18,5                                                                                                     | 19,5 | 17,6 | 16,3 | 17,0 | 17,8 | 16,6 | 17,4 | 17,3 |
| 0608072 | Lubartów (2)         | 0,0                                                                                                      | 0,0  | 0,0  | 1,6  | 1,6  | 1,6  | 1,5  | 1,5  | 1,5  |
| 0609013 | Bełżyce (3)          | 9,7                                                                                                      | 9,6  | 10,6 | 10,5 | 9,3  | 9,2  | 10,2 | 10,2 | 10,3 |
| 0609033 | Bychawa (3)          | 8,3                                                                                                      | 6,9  | 6,9  | 6,9  | 6,9  | 6,8  | 8,2  | 8,2  | 8,0  |
| 0609042 | Garbów (2)           | 7,8                                                                                                      | 7,7  | 9,5  | 7,5  | 7,4  | 9,2  | 7,3  | 5,4  | 5,3  |
| 0609052 | Głusk (2)            | 2,4                                                                                                      | 2,4  | 2,3  | 2,2  | 2,1  | 2,0  | 5,9  | 5,6  | 7,1  |
| 0609062 | Jabłonna (2)         | 4,6                                                                                                      | 0,0  | 0,0  | 0,0  | 0,0  | 0,0  | 0,0  | 0,0  | 0,0  |
| 0609072 | Jastków (2)          | 2,9                                                                                                      | 2,8  | 4,1  | 6,6  | 6,5  | 6,3  | 7,4  | 7,3  | 7,2  |

|         |                       |      |      |      |      |      |      |      |      |      |
|---------|-----------------------|------|------|------|------|------|------|------|------|------|
| 0609082 | Konopnica (2)         | 8,2  | 4,7  | 4,6  | 4,5  | 4,3  | 4,2  | 4,1  | 2,7  | 2,6  |
| 0609102 | Niedrzwica Duża (2)   | 7,9  | 9,3  | 7,6  | 7,5  | 7,4  | 7,3  | 4,3  | 4,3  | 4,3  |
| 0609112 | Niemce (2)            | 11,6 | 11,3 | 10,0 | 10,7 | 10,4 | 10,2 | 8,2  | 8,0  | 7,9  |
| 0609122 | Strzyżewice (2)       | 4,5  | 2,2  | 2,2  | 2,1  | 2,1  | 2,1  | 4,2  | 4,2  | 2,1  |
| 0609132 | Wojciechów (2)        | 0,0  | 0,0  | 0,0  | 0,0  | 0,0  | 0,0  | 0,0  | 0,0  | 0,0  |
| 0609142 | Wólka (2)             | 6,2  | 5,9  | 5,5  | 5,3  | 6,8  | 4,8  | 3,1  | 3,0  | 3,1  |
| 0610033 | Łączna (3)            | 7,9  | 5,9  | 5,8  | 6,2  | 6,2  | 6,1  | 7,2  | 6,6  | 6,7  |
| 0610062 | Spiczyn (2)           | 6,5  | 6,4  | 3,1  | 0,0  | 0,0  | 0,0  | 0,0  | 0,0  | 0,0  |
| 0614083 | Nałęczów (3)          | 10,6 | 10,6 | 12,3 | 12,2 | 10,4 | 10,4 | 12,2 | 12,1 | 13,8 |
| 0617011 | Świdnik (1)           | 10,5 | 9,3  | 9,3  | 8,6  | 8,2  | 8,2  | 8,7  | 9,1  | 9,0  |
| 0617022 | Mełgiew (2)           | 6,4  | 6,2  | 6,0  | 4,0  | 3,8  | 1,9  | 1,8  | 1,8  | 1,8  |
| 0617033 | Piaski (3)            | 9,5  | 9,4  | 9,3  | 7,8  | 7,8  | 6,1  | 7,7  | 7,6  | 6,0  |
| 0663011 | Lublin (1)            | 16,5 | 16,3 | 15,9 | 16,2 | 16,3 | 16,3 | 17,8 | 17,7 | 17,9 |
| 1201011 | Bochnia (1)           | 25,7 | 23,3 | 23,1 | 22,4 | 21,9 | 21,9 | 22,8 | 23,4 | 22,6 |
| 1201022 | Bochnia (2)           | 0,0  | 0,0  | 0,9  | 0,9  | 1,8  | 1,7  | 1,7  | 3,4  | 3,3  |
| 1201032 | Drwinia (2)           | 0,0  | 0,0  | 0,0  | 0,0  | 0,0  | 0,0  | 0,0  | 0,0  | 0,0  |
| 1201052 | Łapanów (2)           | 2,5  | 4,8  | 4,7  | 4,6  | 6,8  | 6,6  | 8,7  | 8,6  | 6,3  |
| 1201063 | Nowy Wiśnicz (3)      | 4,2  | 5,5  | 5,3  | 5,3  | 5,2  | 3,8  | 5,0  | 5,0  | 4,9  |
| 1201072 | Rzezawa (2)           | 1,7  | 1,7  | 1,6  | 1,6  | 1,6  | 1,5  | 1,5  | 3,0  | 2,9  |
| 1201082 | Trzciana (2)          | 3,6  | 3,5  | 3,5  | 3,4  | 3,3  | 3,3  | 3,2  | 3,2  | 3,1  |
| 1201092 | Żegocina (2)          | 10,9 | 10,7 | 10,4 | 10,1 | 10,0 | 9,7  | 6,3  | 6,3  | 9,3  |
| 1206012 | Czernichów (2)        | 5,3  | 5,2  | 5,1  | 5,1  | 5,0  | 4,9  | 4,8  | 7,1  | 6,9  |
| 1206022 | Igołomia-Wawrzeńczy   | 2,2  | 2,1  | 2,1  | 2,1  | 2,1  | 2,1  | 0,0  | 0,0  | 2,0  |
| 1206032 | Iwanowice (2)         | 0,0  | 0,0  | 0,0  | 0,0  | 0,0  | 0,0  | 0,0  | 0,0  | 0,0  |
| 1206042 | Jerzmanowice-Przegir  | 1,6  | 1,6  | 1,6  | 0,0  | 0,0  | 0,0  | 0,0  | 0,0  | 0,0  |
| 1206052 | Kocmyrzów-Luborzyc    | 1,3  | 1,3  | 1,2  | 1,2  | 1,2  | 1,2  | 1,2  | 0,0  | 0,0  |
| 1206063 | Krzeszowice (3)       | 11,9 | 11,8 | 11,8 | 11,2 | 11,6 | 12,0 | 11,9 | 11,8 | 10,7 |
| 1206072 | Liszki (2)            | 5,5  | 5,3  | 5,2  | 4,0  | 4,0  | 3,9  | 4,8  | 7,6  | 7,5  |
| 1206082 | Michałowice (2)       | 2,3  | 4,4  | 4,3  | 4,2  | 4,1  | 2,0  | 1,9  | 0,0  | 1,7  |
| 1206092 | Mogilany (2)          | 6,3  | 4,6  | 5,9  | 5,7  | 5,6  | 5,4  | 6,7  | 6,5  | 6,3  |
| 1206103 | Skała (3)             | 7,1  | 7,0  | 8,6  | 8,5  | 8,4  | 8,3  | 8,2  | 8,1  | 6,3  |
| 1206113 | Skawina (3)           | 14,7 | 15,3 | 14,7 | 14,5 | 15,1 | 14,6 | 15,3 | 14,4 | 14,1 |
| 1206123 | Słomniki (3)          | 4,9  | 6,0  | 4,8  | 4,7  | 4,7  | 4,6  | 3,5  | 3,4  | 5,6  |
| 1206132 | Sułoszowa (2)         | 2,9  | 2,9  | 2,9  | 2,9  | 2,8  | 2,8  | 2,8  | 2,8  | 2,8  |
| 1206143 | Świątniki Górne (3) * | 8,0  | 7,8  | 5,7  | 5,6  | 5,5  | 5,4  | 7,1  | 8,7  | 8,2  |
| 1206152 | Wielka Wieś (2)       | 5,5  | 5,4  | 5,3  | 5,2  | 6,7  | 8,2  | 8,0  | 9,4  | 9,0  |
| 1206162 | Zabierzów (2)         | 14,4 | 16,2 | 16,0 | 17,8 | 16,1 | 16,5 | 19,6 | 23,2 | 23,8 |
| 1206172 | Zielonki (2)          | 7,8  | 9,6  | 9,3  | 12,0 | 9,8  | 9,5  | 11,0 | 8,8  | 9,3  |

|         |                           |      |      |      |      |      |      |      |      |      |
|---------|---------------------------|------|------|------|------|------|------|------|------|------|
| 1208022 | Gołcza (2)                | 5,6  | 2,8  | 2,7  | 2,7  | 2,7  | 2,7  | 2,7  | 2,7  | 2,6  |
| 1209013 | Dobczyce (3)              | 17,2 | 16,7 | 16,4 | 13,8 | 13,5 | 14,3 | 17,3 | 17,1 | 15,7 |
| 1209022 | Lubień (2)                | 0,0  | 0,0  | 0,0  | 0,0  | 1,8  | 1,8  | 1,7  | 0,0  | 0,0  |
| 1209033 | Myślenice (3)             | 13,8 | 13,1 | 12,5 | 12,3 | 11,8 | 10,8 | 11,1 | 10,9 | 11,1 |
| 1209042 | Pcim (2)                  | 10,2 | 10,1 | 9,9  | 11,4 | 11,2 | 11,1 | 10,9 | 10,7 | 10,5 |
| 1209052 | Raciechowice (2)          | 5,9  | 0,0  | 0,0  | 0,0  | 0,0  | 0,0  | 0,0  | 0,0  | 0,0  |
| 1209062 | Siepraw (2)               | 4,5  | 6,6  | 6,4  | 6,2  | 6,2  | 6,0  | 5,9  | 5,8  | 5,7  |
| 1209073 | Sułkowice (3)             | 8,8  | 8,6  | 9,6  | 10,6 | 11,6 | 11,4 | 15,7 | 15,5 | 16,3 |
| 1209082 | Tokarnia (2)              | 2,2  | 0,0  | 0,0  | 2,1  | 2,1  | 2,0  | 2,0  | 0,0  | 0,0  |
| 1209092 | Wiśniowa (2)              | 5,3  | 7,8  | 5,1  | 2,5  | 2,4  | 2,4  | 4,7  | 4,6  | 4,6  |
| 1212062 | Trzyciąż (2)              | 2,5  | 2,4  | 2,4  | 2,4  | 2,4  | 2,4  | 0,0  | 0,0  | 0,0  |
| 1214012 | Koniusza (2)              | 6,0  | 5,9  | 5,8  | 5,7  | 5,6  | 5,5  | 5,5  | 5,4  | 7,2  |
| 1214022 | Koszyce (2)               | 3,0  | 3,0  | 3,0  | 5,9  | 5,9  | 5,9  | 5,9  | 5,9  | 5,6  |
| 1214032 | Nowe Brzesko (2) *        | 11,6 | 8,6  | 8,5  | 5,6  | 5,6  | 5,6  | 5,5  | 5,4  | 8,1  |
| 1214053 | Proszowice (3)            | 11,8 | 7,8  | 5,9  | 5,8  | 5,8  | 5,8  | 8,7  | 8,7  | 9,5  |
| 1218022 | Brzeźnica (2)             | 5,2  | 5,1  | 5,0  | 4,9  | 4,9  | 5,0  | 5,0  | 4,9  | 4,8  |
| 1218033 | Kalwaria Zebrzydowska (2) | 8,8  | 9,6  | 12,1 | 14,5 | 13,5 | 13,2 | 11,4 | 12,1 | 15,1 |
| 1218042 | Lanckorona (2)            | 5,9  | 2,9  | 8,6  | 8,5  | 8,4  | 8,2  | 8,1  | 8,0  | 7,7  |
| 1218072 | Stryków (2)               | 7,7  | 5,1  | 5,0  | 5,0  | 4,9  | 4,9  | 4,8  | 4,8  | 4,6  |
| 1218093 | Wadowice (3)              | 21,4 | 19,8 | 20,1 | 19,9 | 20,2 | 20,1 | 19,9 | 19,0 | 19,0 |
| 1219012 | Biskupice (2)             | 0,0  | 0,0  | 0,0  | 0,0  | 0,0  | 0,0  | 1,8  | 1,7  | 1,7  |
| 1219022 | Gdów (2)                  | 5,4  | 6,3  | 5,1  | 5,0  | 4,9  | 4,9  | 4,8  | 5,7  | 4,6  |
| 1219032 | Kłaj (2)                  | 9,1  | 7,4  | 6,7  | 6,5  | 6,4  | 6,3  | 6,2  | 6,1  | 7,5  |
| 1219043 | Niepołomice (3)           | 15,4 | 14,3 | 14,7 | 14,3 | 16,1 | 15,0 | 14,7 | 17,0 | 18,4 |
| 1219053 | Wieliczka (3)             | 10,2 | 9,9  | 8,0  | 7,8  | 8,0  | 8,5  | 9,9  | 9,4  | 9,2  |
| 1261011 | Kraków (1)                | 22,4 | 21,9 | 22,0 | 21,5 | 21,5 | 21,4 | 22,1 | 22,8 | 23,2 |
| 1405011 | Milanówek (1)             | 23,2 | 21,8 | 20,6 | 20,3 | 22,1 | 20,1 | 17,0 | 18,8 | 18,3 |
| 1405021 | Podkowa Leśna (1)         | 13,1 | 12,9 | 12,8 | 17,0 | 16,7 | 16,8 | 21,2 | 21,4 | 21,1 |
| 1405032 | Baranów (2)               | 0,0  | 0,0  | 0,0  | 3,3  | 3,3  | 3,3  | 3,2  | 3,2  | 0,0  |
| 1405043 | Grodzisk Mazowiecki (2)   | 19,3 | 20,1 | 19,2 | 18,8 | 17,7 | 17,3 | 17,6 | 17,8 | 17,2 |
| 1405052 | Jaktorów (2)              | 8,6  | 6,7  | 8,2  | 9,6  | 7,8  | 7,6  | 4,5  | 5,9  | 5,8  |
| 1405062 | Żabia Wola (2)            | 0,0  | 0,0  | 0,0  | 0,0  | 2,5  | 2,4  | 2,3  | 2,2  | 4,3  |
| 1406032 | Chynów (2)                | 1,8  | 1,8  | 1,7  | 1,7  | 1,7  | 1,7  | 1,7  | 1,6  | 1,6  |
| 1406053 | Grójec (3)                | 17,7 | 16,8 | 16,7 | 15,9 | 15,8 | 15,7 | 16,9 | 17,5 | 16,8 |
| 1406092 | Pniewy (2)                | 0,0  | 0,0  | 0,0  | 0,0  | 0,0  | 0,0  | 0,0  | 0,0  | 0,0  |
| 1408011 | Legionowo (1)             | 10,5 | 9,9  | 9,6  | 10,2 | 9,5  | 9,6  | 11,1 | 10,9 | 11,2 |
| 1408022 | Jabłonna (2)              | 14,6 | 13,6 | 11,3 | 9,3  | 8,8  | 8,3  | 8,0  | 7,7  | 7,5  |
| 1408032 | Nieporęt (2)              | 18,2 | 16,3 | 13,3 | 13,0 | 12,7 | 13,3 | 16,9 | 15,3 | 15,8 |

|         |                          |       |      |      |      |      |      |      |      |      |
|---------|--------------------------|-------|------|------|------|------|------|------|------|------|
| 1408043 | Serock (3)               | 5,9   | 5,8  | 5,7  | 5,6  | 6,8  | 6,6  | 2,5  | 3,7  | 3,6  |
| 1408052 | Wieliszew (2) *          | 18,0  | 17,4 | 16,8 | 16,4 | 14,0 | 13,5 | 11,4 | 12,4 | 12,1 |
| 1412011 | Mińsk Mazowiecki (1)     | 18,7  | 18,0 | 17,9 | 18,1 | 17,5 | 17,1 | 17,1 | 17,9 | 17,0 |
| 1412042 | Cegłów (2)               | 10,7  | 7,9  | 10,5 | 10,5 | 10,5 | 10,5 | 13,2 | 13,2 | 13,0 |
| 1412052 | Dębe Wielkie (2)         | 12,3  | 14,1 | 13,8 | 13,5 | 13,3 | 9,3  | 11,0 | 12,6 | 12,1 |
| 1412062 | Dobre (2)                | 0,0   | 0,0  | 2,9  | 0,0  | 0,0  | 0,0  | 0,0  | 0,0  | 0,0  |
| 1412073 | Halinów (3) *            | 5,6   | 4,0  | 2,6  | 2,5  | 2,4  | 2,3  | 1,1  | 1,1  | 2,2  |
| 1412082 | Jakubów (2)              | 0,0   | 0,0  | 0,0  | 0,0  | 0,0  | 0,0  | 3,3  | 3,3  | 3,3  |
| 1412093 | Kałużyn (3)              | 2,7   | 2,7  | 2,7  | 2,7  | 2,7  | 2,7  | 2,7  | 2,7  | 7,9  |
| 1412102 | Latowicz (2)             | 0,0   | 0,0  | 0,0  | 0,0  | 0,0  | 0,0  | 0,0  | 3,1  | 3,0  |
| 1412112 | Mińsk Mazowiecki (2)     | 6,7   | 6,5  | 7,7  | 7,5  | 7,3  | 8,3  | 5,8  | 5,7  | 5,6  |
| 1412122 | Mrozy (2)                | 7,8   | 5,7  | 5,7  | 5,7  | 5,6  | 5,6  | 3,7  | 3,7  | 3,7  |
| 1412132 | Siennica (2)             | 7,4   | 7,3  | 7,2  | 9,6  | 9,4  | 9,2  | 9,1  | 9,0  | 8,8  |
| 1412142 | Stanisławów (2)          | 5,6   | 5,5  | 5,4  | 5,3  | 5,3  | 5,2  | 2,5  | 2,5  | 2,4  |
| 1412151 | Sulejówek (1) *          | 10,6  | 10,4 | 11,2 | 11,0 | 10,1 | 10,1 | 12,5 | 12,4 | 14,0 |
| 1414011 | Nowy Dwór Mazowiecki (2) | 22,6  | 21,9 | 21,8 | 22,2 | 22,3 | 23,5 | 24,1 | 22,5 | 21,0 |
| 1414022 | Czosnów (2)              | 15,5  | 17,0 | 14,7 | 16,3 | 15,9 | 17,4 | 18,7 | 13,4 | 16,4 |
| 1414032 | Leoncin (2)              | 6,7   | 3,3  | 3,2  | 3,2  | 6,2  | 6,1  | 6,1  | 9,2  | 8,7  |
| 1414052 | Pomiechówek (2)          | 11,0  | 9,1  | 7,2  | 7,1  | 7,1  | 7,1  | 7,1  | 5,3  | 5,2  |
| 1414063 | Zakroczym (3)            | 7,8   | 7,6  | 7,6  | 7,6  | 7,6  | 7,5  | 9,9  | 9,9  | 9,7  |
| 1417011 | Józefów (1)              | 18,9  | 17,5 | 17,9 | 16,6 | 17,9 | 17,6 | 18,1 | 18,6 | 18,3 |
| 1417021 | Otwock (1)               | 13,3  | 16,3 | 16,6 | 17,3 | 17,1 | 16,6 | 14,0 | 13,9 | 13,4 |
| 1417032 | Celestynów (2)           | 8,9   | 10,2 | 10,0 | 9,8  | 9,7  | 8,2  | 10,8 | 12,1 | 12,1 |
| 1417043 | Karczew (3)              | 10,5  | 11,4 | 11,4 | 11,3 | 12,2 | 12,2 | 12,2 | 11,3 | 11,4 |
| 1417052 | Kołbiel (2)              | 8,6   | 10,5 | 8,2  | 8,2  | 8,1  | 8,0  | 7,9  | 5,9  | 5,9  |
| 1417082 | Wiązowna (2)             | 13,9  | 13,5 | 13,2 | 16,1 | 15,6 | 18,4 | 23,9 | 24,5 | 27,2 |
| 1418013 | Góra Kalwaria (3)        | 13,4  | 13,2 | 12,4 | 11,0 | 10,2 | 11,4 | 10,7 | 9,3  | 10,4 |
| 1418023 | Konstancin-Jeziorna (3)  | 21,9  | 23,6 | 24,7 | 23,0 | 20,8 | 21,3 | 19,2 | 19,2 | 17,9 |
| 1418032 | Lesznowola (2)           | 20,7  | 23,6 | 22,6 | 20,9 | 19,0 | 19,1 | 18,3 | 18,4 | 18,2 |
| 1418043 | Piaseczno (3)            | 20,5  | 21,2 | 19,5 | 18,8 | 17,7 | 16,6 | 16,0 | 16,9 | 17,0 |
| 1418052 | Prażmów (2)              | 2,0   | 2,0  | 3,8  | 1,8  | 1,8  | 1,7  | 1,7  | 0,0  | 0,0  |
| 1418063 | Tarczyn (3) *            | #ARG! | 9,2  | 9,0  | 7,4  | 8,9  | 8,8  | 8,8  | 7,3  | 7,1  |
| 1421011 | Piastów (1)              | 7,6   | 7,0  | 7,0  | 8,3  | 8,3  | 7,8  | 7,9  | 8,7  | 8,8  |
| 1421021 | Pruszków (1)             | 19,2  | 19,1 | 20,1 | 20,0 | 19,7 | 18,3 | 18,6 | 18,5 | 17,4 |
| 1421033 | Brwinów (3)              | 10,9  | 10,7 | 10,5 | 11,0 | 10,9 | 10,8 | 11,3 | 11,0 | 10,1 |
| 1421042 | Michałowice (2)          | 12,0  | 12,6 | 11,4 | 12,1 | 19,7 | 20,4 | 25,8 | 25,5 | 25,7 |
| 1421052 | Nadarzyn (2)             | 20,2  | 16,3 | 17,1 | 18,1 | 17,7 | 17,1 | 18,1 | 25,7 | 25,5 |
| 1421062 | Raszyn (2)               | 17,1  | 18,6 | 17,8 | 17,5 | 18,1 | 17,3 | 18,0 | 21,0 | 21,8 |

[illegible]

|         |                       |      |      |      |      |      |      |      |      |      |
|---------|-----------------------|------|------|------|------|------|------|------|------|------|
| 2204082 | Trąbki Wielkie (2)    | 7,4  | 7,2  | 7,0  | 5,1  | 5,0  | 4,9  | 3,2  | 1,6  | 1,5  |
| 2205012 | Chmielno (2)          | 2,8  | 2,7  | 2,7  | 5,2  | 5,2  | 5,1  | 4,9  | 4,8  | 4,7  |
| 2205023 | Kartuzy (3)           | 14,9 | 13,6 | 12,7 | 13,1 | 12,4 | 12,7 | 14,1 | 13,0 | 12,7 |
| 2205032 | Przodkowo (2)         | 7,9  | 7,6  | 7,5  | 7,3  | 7,2  | 6,9  | 11,3 | 13,1 | 12,3 |
| 2205042 | Sierakowice (2)       | 6,7  | 5,4  | 5,3  | 7,2  | 7,1  | 6,9  | 9,7  | 9,6  | 9,2  |
| 2205052 | Somonino (2)          | 4,0  | 5,8  | 5,7  | 5,6  | 5,5  | 5,3  | 5,2  | 5,1  | 5,0  |
| 2205062 | Stężycza (2)          | 6,4  | 4,1  | 4,0  | 3,9  | 3,8  | 3,7  | 3,7  | 3,6  | 3,5  |
| 2205072 | Sulęczyno (2)         | 3,9  | 3,8  | 3,7  | 0,0  | 0,0  | 0,0  | 0,0  | 0,0  | 0,0  |
| 2205083 | Żukowo (3)            | 13,1 | 12,7 | 14,1 | 13,6 | 13,6 | 13,0 | 13,0 | 13,6 | 13,3 |
| 2208011 | Lębork (1)            | 22,4 | 22,6 | 23,8 | 23,2 | 22,6 | 22,7 | 22,8 | 20,6 | 19,7 |
| 2208021 | Łeba (1)              | 8,2  | 8,1  | 4,0  | 4,0  | 8,0  | 8,1  | 12,3 | 16,3 | 15,4 |
| 2208032 | Cewice (2)            | 7,0  | 7,0  | 7,0  | 2,3  | 2,3  | 2,3  | 2,2  | 2,2  | 2,1  |
| 2208042 | Nowa Wieś Lęborska    | 2,8  | 4,1  | 4,0  | 6,4  | 6,3  | 6,2  | 7,4  | 7,3  | 8,2  |
| 2208052 | Wicko (2)             | 12,1 | 9,0  | 8,8  | 11,5 | 11,4 | 14,0 | 11,1 | 10,8 | 7,8  |
| 2209011 | Malbork (1)           | 17,9 | 15,7 | 15,1 | 15,9 | 15,9 | 17,1 | 18,3 | 19,5 | 19,4 |
| 2209032 | Lichnowy (2)          | 0,0  | 0,0  | 0,0  | 0,0  | 0,0  | 0,0  | 0,0  | 0,0  | 3,2  |
| 2209042 | Malbork (2)           | 4,1  | 4,0  | 8,0  | 7,8  | 7,7  | 7,5  | 3,7  | 3,6  | 3,4  |
| 2209062 | Miłoradz (2)          | 0,0  | 0,0  | 0,0  | 0,0  | 0,0  | 0,0  | 0,0  | 0,0  | 0,0  |
| 2209073 | Nowy Staw (3)         | 6,3  | 2,1  | 2,1  | 2,0  | 2,0  | 2,0  | 4,0  | 4,0  | 3,9  |
| 2209082 | Stare Pole (2)        | 7,2  | 7,0  | 10,4 | 6,8  | 6,7  | 6,7  | 6,6  | 6,5  | 6,4  |
| 2210011 | Krynica Morska (1)    | 11,8 | 11,6 | 11,4 | 11,0 | 10,7 | 11,0 | 11,1 | 11,2 | 11,1 |
| 2210023 | Nowy Dwór Gdański (3) | 11,8 | 10,7 | 10,6 | 11,5 | 11,4 | 11,3 | 12,0 | 12,0 | 11,7 |
| 2210032 | Ostaszewo (2)         | 0,0  | 0,0  | 0,0  | 0,0  | 0,0  | 0,0  | 0,0  | 0,0  | 4,7  |
| 2210042 | Stegna (2)            | 3,4  | 5,1  | 5,0  | 4,9  | 4,8  | 4,8  | 4,7  | 4,7  | 4,6  |
| 2210052 | Sztutowo (2)          | 13,9 | 4,5  | 4,5  | 4,4  | 4,3  | 4,3  | 0,0  | 0,0  | 0,0  |
| 2211011 | Hel (1)               | 14,1 | 10,4 | 10,6 | 10,9 | 11,2 | 11,7 | 8,0  | 8,1  | 3,8  |
| 2211031 | Puck (1)              | 19,6 | 16,7 | 16,6 | 17,9 | 16,5 | 16,6 | 20,9 | 22,4 | 22,0 |
| 2211041 | Władysławowo (1)      | 17,3 | 17,1 | 16,8 | 16,7 | 15,4 | 15,3 | 14,2 | 15,2 | 14,9 |
| 2211052 | Kosakowo (2)          | 4,6  | 6,6  | 6,0  | 7,7  | 5,4  | 5,1  | 4,9  | 6,4  | 7,4  |
| 2211062 | Krokowa (2)           | 17,2 | 20,2 | 18,2 | 17,8 | 17,5 | 17,2 | 18,5 | 18,3 | 16,6 |
| 2211072 | Puck (2)              | 1,6  | 3,2  | 5,4  | 5,2  | 4,4  | 4,3  | 6,3  | 6,1  | 7,3  |
| 2214011 | Tczew (1)             | 14,4 | 14,2 | 14,4 | 14,8 | 14,0 | 14,3 | 15,3 | 15,1 | 15,2 |
| 2214023 | Gniew (3)             | 9,5  | 10,4 | 10,4 | 9,2  | 9,1  | 9,1  | 10,1 | 10,2 | 9,7  |
| 2214032 | Morzeszczyn (2)       | 0,0  | 4,4  | 4,3  | 4,3  | 4,2  | 4,1  | 4,1  | 4,1  | 4,1  |
| 2214043 | Pelplin (3)           | 14,6 | 14,5 | 14,4 | 15,1 | 14,1 | 14,0 | 13,9 | 14,8 | 13,7 |
| 2214052 | Subkowy (2)           | 0,0  | 0,0  | 0,0  | 0,0  | 0,0  | 0,0  | 0,0  | 0,0  | 0,0  |
| 2214062 | Tczew (2)             | 6,1  | 5,9  | 5,8  | 4,3  | 4,2  | 4,1  | 9,2  | 11,5 | 10,8 |
| 2215011 | Reda (1)              | 9,6  | 10,1 | 9,8  | 8,0  | 7,0  | 6,8  | 5,9  | 4,3  | 4,0  |

|         |                       |      |      |      |      |      |      |      |      |      |
|---------|-----------------------|------|------|------|------|------|------|------|------|------|
| 2215021 | Rumia (1)             | 12,6 | 13,2 | 13,4 | 13,2 | 13,8 | 13,4 | 14,0 | 14,4 | 14,5 |
| 2215031 | Wejherowo (1)         | 15,2 | 14,4 | 15,0 | 16,2 | 14,9 | 15,5 | 15,0 | 14,5 | 13,5 |
| 2215042 | Choczewo (2)          | 3,0  | 3,0  | 5,8  | 2,9  | 2,9  | 2,8  | 2,8  | 2,8  | 2,7  |
| 2215052 | Gniewino (2)          | 15,5 | 17,6 | 17,2 | 16,7 | 16,5 | 13,9 | 11,4 | 13,3 | 13,0 |
| 2215062 | Linia (2)             | 0,0  | 3,1  | 3,0  | 0,0  | 0,0  | 0,0  | 0,0  | 0,0  | 0,0  |
| 2215072 | Luzino (2)            | 7,3  | 5,7  | 6,8  | 7,9  | 6,4  | 7,4  | 11,9 | 11,7 | 11,4 |
| 2215082 | Łęczyce (2)           | 3,0  | 3,0  | 2,9  | 2,9  | 2,8  | 2,8  | 5,5  | 4,1  | 4,0  |
| 2215092 | Szemud (2)            | 9,3  | 8,8  | 8,3  | 9,3  | 9,0  | 8,6  | 11,7 | 11,2 | 10,7 |
| 2215102 | Wejherowo (2)         | 12,6 | 12,9 | 12,1 | 13,3 | 12,7 | 12,2 | 15,6 | 17,3 | 16,3 |
| 2261011 | Gdańsk (1)            | 18,5 | 17,2 | 17,1 | 17,2 | 17,3 | 17,8 | 18,7 | 19,2 | 18,9 |
| 2262011 | Gdynia (1)            | 17,8 | 16,5 | 16,8 | 17,2 | 17,5 | 17,8 | 18,3 | 19,3 | 19,1 |
| 2264011 | Sopot (1)             | 22,3 | 21,1 | 22,6 | 24,4 | 24,3 | 24,5 | 27,7 | 28,6 | 28,0 |
| 3003011 | Gnieszno (1)          | 20,0 | 19,3 | 18,9 | 18,8 | 19,3 | 19,3 | 21,5 | 22,1 | 20,8 |
| 3003023 | Czarniejewo (3)       | 13,8 | 13,5 | 13,4 | 13,2 | 15,3 | 17,2 | 14,9 | 14,8 | 14,6 |
| 3003032 | Gnieszno (2)          | 4,2  | 6,1  | 5,9  | 5,7  | 5,5  | 5,3  | 3,4  | 3,3  | 4,7  |
| 3003042 | Kiszkowo (2)          | 6,2  | 0,0  | 0,0  | 0,0  | 0,0  | 0,0  | 2,9  | 5,7  | 2,9  |
| 3003062 | Łubowo (2)            | 9,5  | 9,3  | 9,1  | 9,0  | 8,7  | 8,6  | 2,8  | 2,7  | 2,6  |
| 3005012 | Granowo (2)           | 14,0 | 13,8 | 13,6 | 13,4 | 13,0 | 12,9 | 12,7 | 15,8 | 18,7 |
| 3005023 | Grodzisk Wielkopolski | 28,0 | 30,0 | 29,6 | 29,2 | 27,3 | 27,8 | 24,2 | 24,8 | 25,4 |
| 3011011 | Kościan (1)           | 35,3 | 34,9 | 34,5 | 34,2 | 34,8 | 29,8 | 26,7 | 26,6 | 24,6 |
| 3011023 | Czempiń (3)           | 9,9  | 11,2 | 12,5 | 12,3 | 12,3 | 12,2 | 10,8 | 12,2 | 9,4  |
| 3011032 | Kościan (2)           | 17,1 | 15,5 | 17,4 | 18,0 | 18,8 | 17,5 | 13,2 | 15,9 | 15,7 |
| 3015043 | Nowy Tomyśl (3)       | 18,5 | 19,5 | 19,1 | 20,1 | 18,7 | 19,2 | 19,0 | 20,8 | 20,0 |
| 3015053 | Opalenica (3)         | 18,6 | 16,2 | 17,1 | 15,9 | 15,8 | 14,7 | 13,6 | 14,6 | 13,4 |
| 3016013 | Oborniki (3)          | 22,6 | 21,7 | 21,0 | 20,1 | 17,6 | 17,9 | 18,7 | 16,8 | 16,1 |
| 3016023 | Rogoźno (3)           | 13,2 | 12,9 | 11,0 | 10,9 | 9,9  | 10,8 | 11,6 | 9,7  | 10,2 |
| 3021011 | Luboń (1)             | 13,2 | 12,1 | 12,3 | 12,0 | 12,4 | 12,0 | 14,5 | 13,7 | 13,4 |
| 3021021 | Puszczykowo (1)       | 24,7 | 29,6 | 30,4 | 30,0 | 32,8 | 30,9 | 22,7 | 25,7 | 23,8 |
| 3021033 | Buk (3)               | 13,7 | 12,1 | 11,9 | 9,2  | 11,7 | 11,6 | 17,8 | 21,6 | 21,4 |
| 3021042 | Czerwonak (2)         | 19,4 | 17,4 | 16,9 | 15,2 | 15,5 | 14,5 | 14,7 | 13,4 | 14,4 |
| 3021052 | Dopiewo (2)           | 16,9 | 17,2 | 13,4 | 11,3 | 10,6 | 10,9 | 13,1 | 14,1 | 15,0 |
| 3021062 | Kleszczewo (2)        | 12,8 | 12,5 | 12,1 | 11,8 | 11,2 | 10,9 | 15,8 | 18,1 | 15,2 |
| 3021072 | Komorniki (2)         | 21,2 | 21,5 | 21,7 | 22,6 | 25,4 | 27,4 | 32,9 | 32,3 | 27,0 |
| 3021083 | Kostrzyn (3)          | 10,6 | 8,3  | 6,2  | 7,1  | 8,0  | 7,8  | 9,5  | 8,5  | 8,1  |
| 3021093 | Kórnik (3)            | 24,6 | 25,6 | 21,7 | 20,6 | 20,5 | 20,3 | 22,1 | 22,2 | 20,6 |
| 3021103 | Mosina (3)            | 13,7 | 12,7 | 13,7 | 14,7 | 14,4 | 13,0 | 12,2 | 13,7 | 12,1 |
| 3021113 | Murowana Goślina (3)  | 14,5 | 15,1 | 13,7 | 11,4 | 12,1 | 11,8 | 9,8  | 10,6 | 10,5 |
| 3021123 | Pobiedziska (3)       | 7,4  | 6,1  | 5,9  | 4,8  | 4,7  | 4,5  | 8,0  | 6,9  | 7,6  |

|         |                        |      |      |      |      |      |      |      |      |      |
|---------|------------------------|------|------|------|------|------|------|------|------|------|
| 3021132 | Rokietnica (2)         | 9,9  | 9,4  | 7,1  | 8,3  | 9,4  | 8,9  | 12,5 | 11,7 | 11,1 |
| 3021143 | Stęszew (3)            | 25,2 | 25,8 | 26,5 | 20,3 | 18,8 | 19,6 | 21,4 | 22,2 | 19,9 |
| 3021152 | Suchy Las (2)          | 23,9 | 21,2 | 23,9 | 24,6 | 23,7 | 27,3 | 31,7 | 33,1 | 33,8 |
| 3021163 | Swarzędz (3)           | 16,6 | 16,2 | 16,0 | 17,0 | 16,7 | 16,4 | 20,0 | 20,1 | 20,2 |
| 3021172 | Tarnowo Podgórne (2)   | 40,5 | 39,9 | 44,3 | 42,4 | 44,4 | 47,3 | 53,4 | 56,0 | 58,6 |
| 3024022 | Duszniki (2)           | 8,0  | 9,8  | 11,7 | 13,4 | 13,3 | 13,1 | 11,1 | 10,9 | 12,8 |
| 3024032 | Kaźmierz (2)           | 9,2  | 6,7  | 6,6  | 6,4  | 4,2  | 4,2  | 4,1  | 4,1  | 2,0  |
| 3024073 | Szamotuły (3)          | 15,2 | 15,5 | 15,8 | 13,6 | 13,5 | 11,8 | 13,9 | 15,5 | 14,7 |
| 3025012 | Dominowo (2)           | 17,1 | 5,6  | 5,6  | 5,5  | 5,4  | 5,3  | 0,0  | 0,0  | 0,0  |
| 3025043 | Środa Wielkopolska (3) | 17,3 | 16,0 | 15,8 | 16,2 | 16,1 | 15,0 | 19,0 | 20,8 | 20,6 |
| 3025052 | Zaniemyśl (2)          | 18,9 | 18,5 | 20,8 | 20,4 | 17,7 | 17,4 | 17,2 | 17,0 | 16,3 |
| 3026012 | Brodnica (2)           | 17,6 | 17,2 | 17,1 | 16,9 | 20,2 | 23,0 | 22,8 | 19,3 | 21,5 |
| 3026043 | Śrem (3)               | 21,8 | 21,5 | 20,8 | 19,8 | 20,5 | 21,6 | 21,1 | 21,8 | 21,5 |
| 3028011 | Wągrowiec (1)          | 25,8 | 24,2 | 23,2 | 22,3 | 21,5 | 22,1 | 20,1 | 16,5 | 16,3 |
| 3028053 | Skoki (3)              | 9,9  | 9,6  | 9,2  | 7,2  | 7,1  | 8,7  | 3,4  | 3,4  | 3,4  |
| 3028072 | Wągrowiec (2)          | 4,5  | 4,4  | 7,2  | 4,3  | 4,2  | 4,2  | 6,8  | 8,2  | 8,0  |
| 3030033 | Nekla (3) *            | 14,8 | 12,1 | 14,1 | 13,9 | 16,0 | 18,0 | 13,3 | 10,9 | 12,8 |
| 3030053 | Września (3)           | 14,6 | 15,2 | 16,7 | 16,6 | 16,9 | 17,4 | 19,4 | 18,7 | 19,1 |
| 3064011 | Poznań (1)             | 22,8 | 22,9 | 23,1 | 22,9 | 23,0 | 22,9 | 24,4 | 24,4 | 24,6 |

Source: data from Poland's Central Statistical Office (GUS)
