# Supplementary material
Source: MDPI journal article supplement (https://www.mdpi.com/2071-1050/10/3/837)
Supplement: s1 [file s1]

| KOD GUS | Municipality     | Land under various forms of environmental protection (1996-2010) [ha] |        |        |        |        |        |        |        |        |        |        |        |        |        |        |
|---------|------------------|-----------------------------------------------------------------------|--------|--------|--------|--------|--------|--------|--------|--------|--------|--------|--------|--------|--------|--------|
|         |                  | 1996                                                                  | 1997   | 1998   | 1999   | 2000   | 2001   | 2002   | 2003   | 2004   | 2005   | 2006   | 2007   | 2008   | 2009   | 2010   |
| 0214011 | Oleśnica (1)     | 0                                                                     | 0      | 0      | 0      | 0      | 0      | 0      | 0      | 0      | 0      | 0      | 0      | 0      | 0      | 0      |
| 0214032 | Dobroszyce (2)   | 0                                                                     | 0      | 0      | 0      | 0      | 0      | 0      | 0      | 0      | 0      | 0      | 0      | 0      | 0      | 0      |
| 0214062 | Oleśnica (2)     | 0                                                                     | 0      | 0      | 0      | 0      | 0      | 0      | 0      | 37     | 119,2  | 119,2  | 189,5  | 189,5  | 189,5  | 189,5  |
| 0215011 | Oława (1)        | 0                                                                     | 0      | 0      | 0      | 0      | 0      | 0      | 0      | 0      | 0      | 0      | 0      | 0      | 0      | 0      |
| 0215022 | Domaniów (2)     | 0                                                                     | 0      | 0      | 0      | 0      | 0      | 0      | 0      | 0      | 0      | 0      | 0      | 0      | 0      | 0      |
| 0215033 | Jelcz-Laskowice  | 6,9                                                                   | 6,9    | 6,9    | 6,9    | 6,9    | 6,9    | 6,9    | 6,9    | 6,9    | 6,9    | 6,9    | 6,9    | 6,9    | 6,9    | 6,9    |
| 0215042 | Oława (2)        | 18,5                                                                  | 18,5   | 18,5   | 18,5   | 18,5   | 18,5   | 18,5   | 18,5   | 18,5   | 18,5   | 18,5   | 18,5   | 18,5   | 17,3   | 17,3   |
| 0217012 | Borów (2)        | 0                                                                     | 0      | 0      | 0      | 0      | 0      | 0      | 0      | 0      | 0      | 0      | 0      | 0      | 0      | 0      |
| 0218012 | Kostomłoty (2)   | 0                                                                     | 0      | 0      | 0      | 0      | 0      | 0      | 0      | 0      | 0      | 0      | 0      | 0      | 0      | 0      |
| 0218032 | Miękinia (2)     | 34,9                                                                  | 34,9   | 524,9  | 524,9  | 524,9  | 524,9  | 524,9  | 524,9  | 524,9  | 524,9  | 524,9  | 524,9  | 524,9  | 524,1  | 524,1  |
| 0218043 | Środa Śląska (3) | 0                                                                     | 0      | 0      | 0      | 0      | 0      | 0      | 0      | 0      | 0      | 0      | 0      | 0      | 0      | 0      |
| 0220013 | Oborniki Śląskie | 7,5                                                                   | 7,5    | 7,5    | 7,5    | 7,5    | 7,5    | 7,5    | 7,5    | 7,5    | 7,5    | 7,5    | 7,5    | 7,5    | 7,5    | 7,5    |
| 0220023 | Prusice (3) *    | 520                                                                   | 520    | 520    | 520    | 520    | 520    | 520    | 520    | 520    | 520    | 520    | 520    | 520    | 520    | 520    |
| 0220033 | Trzebnica (3)    | 790,7                                                                 | 790,7  | 790,7  | 790,7  | 812,5  | 812,5  | 812,5  | 812,5  | 812,5  | 812,5  | 812,5  | 812,5  | 812,5  | 812,5  | 812,5  |
| 0220042 | Wisznia Mała (2) | 0                                                                     | 0      | 0      | 0      | 0      | 0      | 0      | 0      | 0      | 0      | 0      | 0      | 0      | 3440   | 3440   |
| 0220052 | Zawonia (2)      | 0                                                                     | 0      | 0      | 0      | 0      | 0      | 0      | 0      | 0      | 0      | 0      | 54,3   | 54,3   | 54,3   | 54,3   |
| 0222013 | Brzeg Dolny (3)  | 1,9                                                                   | 1,9    | 1,9    | 1,9    | 1,9    | 1,9    | 1,9    | 1,9    | 1,9    | 1,9    | 1,9    | 1,9    | 1,9    | 1,9    | 1,9    |
| 0223012 | Czernica (2)     | 0                                                                     | 0      | 0      | 0      | 0      | 0      | 0      | 0      | 0      | 0      | 0      | 0      | 0      | 0      | 0      |
| 0223022 | Długołęka (2)    | 0                                                                     | 0      | 0      | 0      | 0      | 0      | 0      | 0      | 0      | 0      | 0      | 0      | 0      | 0      | 0      |
| 0223032 | Jordanów Śląsk   | 540                                                                   | 540    | 540    | 540    | 540    | 540    | 540    | 540    | 540    | 540    | 540    | 540    | 540    | 540    | 540    |
| 0223043 | Kąty Wrocławskie | 0                                                                     | 0      | 4021   | 4021   | 4021   | 4021   | 4021   | 4021   | 4021   | 4021   | 4021,6 | 4021,6 | 4021,6 | 4021,6 | 4021,6 |
| 0223052 | Kobierzyce (2)   | 0                                                                     | 0      | 0      | 0      | 0      | 0      | 0      | 0      | 0      | 0      | 0      | 0      | 0      | 0      | 0      |
| 0223062 | Mietków (2)      | 0                                                                     | 0      | 3188   | 3188   | 3188   | 3188   | 3188   | 3188   | 3188   | 3188   | 3188   | 3188   | 3188   | 3188   | 3188   |
| 0223073 | Sobótka (3)      | 4292,8                                                                | 4292,8 | 4479,8 | 4447   | 4447   | 4447   | 4447,1 | 4447,1 | 4447   | 4447   | 4447   | 4447   | 4447   | 4448,1 | 4448,1 |
| 0223083 | Siechnice (3) *  | -                                                                     | 0      | 0      | 0      | 0      | 0      | 0      | 0      | 0      | 0      | 0      | 0      | 0      | 0      | 0      |
| 0223092 | Żórawina (2)     | 0                                                                     | 0      | 0      | 0      | 0      | 0      | 0      | 0      | 0      | 0      | 0      | 0      | 0      | 0      | 0      |
| 0264011 | Wrocław (1)      | 0                                                                     | 6,8    | 1305,3 | 684    | 685,8  | 1816,8 | 1824,2 | 1824,2 | 1836,5 | 1836,5 | 1836,5 | 719    | 719    | 705,5  | 705,5  |
| 0608011 | Lubartów (1)     | 0                                                                     | 0      | 0      | 0      | 0      | 0      | 0      | 0      | 0      | 0      | 0      | 0      | 0      | 0      | 0      |
| 0608072 | Lubartów (2)     | 3685,5                                                                | 3685,4 | 4422,4 | 4422,4 | 4422,4 | 4422,4 | 4422,4 | 4422,4 | 4422,4 | 4422,4 | 4422,4 | 4422,4 | 4422,4 | 4429,2 | 4429,2 |
| 0609013 | Bełżyce (3)      | 450                                                                   | 450    | 450    | 450    | 450    | 450    | 450    | 450    | 450    | 450    | 450    | 450    | 450    | 450    | 450    |
| 0609033 | Bychawa (3)      | 4070                                                                  | 4070   | 4070   | 4070   | 4070   | 4070   | 4070   | 4070   | 4070   | 4070   | 4070   | 4070   | 4070   | 4070   | 4070   |
| 0609042 | Garbów (2)       | 2476                                                                  | 2430   | 2430   | 2430   | 2430   | 2430   | 2430   | 2430   | 2430   | 2430   | 2430   | 2430   | 2430   | 2430   | 2430   |
| 0609052 | Giłsk (2)        | 1880                                                                  | 1880   | 1880   | 1880   | 1880   | 1880   | 1880   | 1880   | 1880   | 1880   | 1880   | 1880   | 1880   | 1880   | 1880   |
| 0609062 | Jabłonna (2)     | 60                                                                    | 4532   | 4532   | 4532   | 4532   | 4532   | 4531,3 | 4531,3 | 4531,3 | 4531,4 | 4531,3 | 4531,3 | 4531,3 | 4531,3 | 4532   |
| 0609072 | Jastków (2)      | 240                                                                   | 240    | 240    | 240    | 240    | 240    | 240    | 240    | 240    | 240    | 240    | 240    | 240    | 240    | 240    |
| 0609082 | Konopnica (2)    | 11                                                                    | 11     | 11     | 11     | 11     | 11     | 11     | 11     | 11     | 11     | 11     | 11     | 11     | 11     | 11     |

|         |                           |         |        |        |        |        |        |        |        |        |        |        |        |        |        |        |
|---------|---------------------------|---------|--------|--------|--------|--------|--------|--------|--------|--------|--------|--------|--------|--------|--------|--------|
| 0609102 | Niedrzwica Duża           | 70      | 70     | 70     | 70     | 70     | 70     | 70     | 70     | 70     | 70     | 70     | 70     | 70     | 70     | 70     |
| 0609112 | Niemce (2)                | 2094,2  | 2090   | 3064   | 3069,5 | 3069,5 | 3069,5 | 3069,5 | 3069,5 | 9,7    | 3069,5 | 3069,5 | 3069,5 | 3069,5 | 3064   | 3064   |
| 0609122 | Strzyżewice (2)           | 1680    | 1680   | 1680   | 1680   | 1680   | 1680   | 1680   | 1680   | 1680   | 1680   | 1680   | 1680   | 1680   | 1680   | 1680   |
| 0609132 | Wojciechów (2)            | 0       | 0      | 0      | 0      | 0      | 0      | 0      | 0      | 0      | 0      | 0      | 0      | 0      | 0      | 0      |
| 0609142 | Wólka (2)                 | 357     | 357    | 357    | 357    | 357    | 357    | 357    | 357    | 357    | 357    | 357    | 357    | 357    | 357    | 357    |
| 0610033 | Łączna (3)                | 1022    | 1022   | 1022   | 1022   | 1022   | 1022   | 1022   | 1022   | 1022   | 1022   | 1022   | 1022   | 1022   | 1022   | 1022   |
| 0610062 | Spiczyn (2)               | 336,9   | 336,9  | 336,9  | 336,9  | 336,9  | 336,9  | 336,9  | 336,9  | 336,9  | 336,9  | 336,9  | 336,9  | 336,9  | 336,9  | 336,9  |
| 0614083 | Nałęczów (3)              | 5       | 5      | 11     | 11     | 11     | 11     | 11     | 11     | 11     | 11     | 11     | 11     | 11     | 11     | 11     |
| 0617011 | Świdnik (1)               | 0       | 0      | 0      | 0      | 0      | 0      | 0      | 0      | 0      | 0      | 0      | 0      | 0      | 0      | 96,3   |
| 0617022 | Mełgiew (2)               | 100     | 100    | 100    | 100    | 100    | 100    | 100    | 100    | 100    | 100    | 100    | 100    | 100    | 100    | 100    |
| 0617033 | Piaski (3)                | 1460    | 1460   | 1460   | 1460   | 1460   | 1460   | 1460   | 1460   | 1460   | 1460   | 1460   | 1460   | 1460   | 1460   | 1460   |
| 0663011 | Lublin (1)                | 2530    | 2530   | 2530   | 2530   | 2530   | 2530   | 2530   | 2530   | 2530   | 2530   | 2530   | 2530   | 2530   | 2530   | 2530   |
| 1201011 | Bochnia (1)               | 251     | 251    | 251    | 251    | 251    | 251    | 251    | 251    | 251    | 252,1  | 160    | 160    | 160    | 160    | 160    |
| 1201022 | Bochnia (2)               | 4286    | 4286   | 4286   | 4286   | 4286   | 4286   | 4286   | 4286   | 4310,1 | 4310,1 | 4481,1 | 4481,1 | 4481,1 | 4481,1 | 4481,1 |
| 1201032 | Drwinia (2)               | 45,1    | 45,1   | 45,1   | 45,1   | 45,1   | 45,5   | 45,5   | 45,5   | 45,5   | 45,3   | 45,1   | 45,1   | 45,1   | 45,1   | 45,1   |
| 1201052 | Łapanów (2)               | 7105,5  | 7105,5 | 7105,5 | 7105,5 | 7105,5 | 7105,5 | 7105,5 | 7105,5 | 7105,5 | 7105,5 | 7118   | 7118   | 7118   | 7118   | 7118   |
| 1201063 | Nowy Wiśnicz (3)          | 1529,7  | 8249   | 8249   | 8249   | 8249   | 8249   | 8249   | 8249   | 8249   | 8249   | 8249   | 8249   | 8249   | 8249   | 8249   |
| 1201072 | Rzezawa (2)               | 6012,6  | 6012,6 | 6014   | 6013,9 | 6013,9 | 6012,6 | 6011,3 | 6012,6 | 6012,6 | 6012,6 | 5636   | 5636   | 5636   | 5636   | 5636   |
| 1201082 | Trzciana (2)              | 0       | 3060,1 | 3060,1 | 3060,2 | 3060,2 | 2996,1 | 2997,4 | 2996,1 | 2996,1 | 2996,1 | 3995,7 | 3995,7 | 3995,7 | 3995,7 | 3995,7 |
| 1201092 | Żegocina (2)              | 3702,9  | 706,8  | 706,8  | 706,8  | 706,8  | 770,9  | 770,9  | 770,9  | 770,8  | 770,8  | 505,8  | 505,8  | 505,8  | 505,8  | 505,8  |
| 1206012 | Czernichów (2)            | 8438    | 2969,5 | 2969,5 | 2969,5 | 2969,5 | 2969,5 | 2969,5 | 2969,5 | 3105,7 | 3105,7 | 3105,7 | 3105,7 | 3105,7 | 3105,7 | 3105,7 |
| 1206022 | Igołomia-Wawrzyszów (2)   | 0       | 0      | 0      | 0      | 0      | 0      | 0      | 0      | 0      | 0      | 0      | 0      | 0      | 0      | 0      |
| 1206032 | Iwanowice (2)             | 4278,5  | 1873   | 1873   | 1873   | 1873   | 1873   | 1873   | 1873   | 2355,5 | 2355,5 | 2355,5 | 2355,5 | 2355,5 | 2355,5 | 2355,5 |
| 1206042 | Jerzmanowice-Przykona (2) | 5802    | 4097,8 | 4097,8 | 4097,8 | 4097,8 | 4097,8 | 4097,8 | 4097,8 | 4171,9 | 4171,9 | 4171,9 | 4171,9 | 4171,9 | 4171,9 | 4171,9 |
| 1206052 | Kocmyrów-Lubieszyn (2)    | 0       | 0      | 0      | 0      | 0      | 0      | 0      | 0      | 0      | 0      | 0      | 0      | 0      | 0      | 0      |
| 1206063 | Krzeszowice (3)           | 13968,8 | 8841,9 | 8842   | 8841,9 | 8841,9 | 8841,8 | 8841,8 | 8841,8 | 9139,9 | 9139,8 | 9144,5 | 9143,5 | 9143,5 | 9143,5 | 9142   |
| 1206072 | Liszki (2)                | 7172,7  | 2263,1 | 2263,2 | 2263,1 | 2263,1 | 2263   | 2263   | 2263   | 2377,4 | 2377,3 | 2377,4 | 2377,4 | 2377,4 | 2377,4 | 2377,4 |
| 1206082 | Michałowice (2)           | 251     | 1292   | 1292   | 1292   | 1292   | 1292   | 1292   | 1292   | 1292   | 1292   | 1292   | 1292   | 1292   | 1292   | 1292   |
| 1206092 | Mogilany (2)              | 10,3    | 10,3   | 10,3   | 10,3   | 10,3   | 0      | 10,3   | 10,3   | 10,3   | 10,3   | 10,3   | 10,3   | 10,3   | 10,3   | 10,3   |
| 1206103 | Skąta (3)                 | 5710,5  | 3958   | 3958   | 3958   | 3958   | 3958   | 3958   | 3958   | 3270,7 | 3270,7 | 3270,7 | 3270,7 | 3270,7 | 3270,8 | 3270,8 |
| 1206113 | Skawina (3)               | 24,2    | 24,2   | 24,2   | 24,2   | 24,2   | 24,2   | 24,2   | 24,2   | 24,2   | 24,2   | 24,2   | 24,2   | 24,2   | 24,2   | 24,2   |
| 1206123 | Ślomniki (3)              | 0       | 0      | 0      | 0      | 0      | 0      | 0      | 0      | 0      | 0      | 0      | 0      | 0      | 0      | 0      |
| 1206132 | Sułoszowa (2)             | 3400,8  | 508,3  | 508,3  | 508,3  | 508,3  | 508,3  | 508,3  | 508,3  | 508,3  | 508,3  | 508,3  | 508,3  | 508,3  | 508,3  | 508,3  |
| 1206143 | Świątniki Górne (2)       | -       | 0      | 0      | 0      | 0      | 0      | 0      | 0      | 0      | 0      | 0      | 0      | 0      | 0      | 0      |
| 1206152 | Wielka Wieś (2)           | 3438,4  | 2812,5 | 2812,5 | 2812,5 | 2812,5 | 2812,5 | 2812,5 | 2812,5 | 2924   | 2924   | 2924   | 2924   | 2924   | 2924   | 2924   |
| 1206162 | Zabierzów (2)             | 10054,7 | 6207,2 | 6210,9 | 6210,8 | 6210,8 | 6207,1 | 6207,1 | 6213,8 | 6296,5 | 6289,9 | 6296,5 | 6296,5 | 6296,5 | 6305,9 | 6305,9 |
| 1206172 | Zielonki (2)              | 3844    | 1855,1 | 1855,1 | 1855,1 | 1855,1 | 1855   | 1855   | 1855   | 1997,5 | 1997,5 | 1997,5 | 1997,5 | 1997,5 | 2006,5 | 2006,5 |
| 1208022 | Gólcza (2)                | 2335,7  | 1275,4 | 1275,4 | 1275,4 | 1275,4 | 1275,4 | 1275,4 | 1275,4 | 1331,4 | 1331,4 | 1331,4 | 1331,4 | 1331,4 | 1331,4 | 1331,4 |

|         |                  |        |        |        |        |        |        |        |        |        |        |        |        |        |        |        |
|---------|------------------|--------|--------|--------|--------|--------|--------|--------|--------|--------|--------|--------|--------|--------|--------|--------|
| 1209013 | Dobczyce (3)     | 0      | 0      | 0      | 0      | 0      | 0      | 0      | 0      | 0      | 0      | 0      | 0      | 0      | 0      | 0      |
| 1209022 | Lubień (2)       | 0      | 0      | 0      | 7501   | 7501   | 7501   | 7501   | 7501   | 7501   | 7501   | 7501   | 7501   | 7501   | 7501   | 7501   |
| 1209033 | Myślenice (3)    | 1938,2 | 1938,2 | 1938,6 | 1938,6 | 1938,6 | 1938,3 | 1938,3 | 1938,3 | 1938,2 | 1938,2 | 1,4    | 1,4    | 1,4    | 1,4    | 1,4    |
| 1209042 | Pcim (2)         | 0      | 0      | 0      | 0      | 0      | 0      | 0      | 0      | 0      | 0      | 0      | 0      | 0      | 0      | 0      |
| 1209052 | Raciechowice (2) | 0      | 0      | 0      | 0      | 0      | 0      | 0      | 0      | 0      | 0      | 0      | 0      | 0      | 0      | 0      |
| 1209062 | Siepraw (2)      | 0      | 0      | 0      | 0      | 0      | 0      | 0      | 0      | 0      | 0      | 0,5    | 0,5    | 0,5    | 0      | 0      |
| 1209073 | Sułkowice (3)    | 0      | 0      | 0,1    | 0,1    | 0,1    | 282,6  | 282,6  | 282,6  | 282,6  | 282,6  | 282,5  | 282,5  | 282,5  | 282,5  | 282,5  |
| 1209082 | Tokarnia (2)     | 0      | 0      | 0      | 0      | 0      | 0      | 0      | 0      | 0      | 0      | 0      | 0      | 0      | 0      | 0      |
| 1209092 | Wiśniowa (2)     | 0      | 0      | 5      | 5      | 5      | 15,3   | 5      | 5      | 5      | 5      | 5,1    | 5,1    | 5,1    | 5,1    | 5,1    |
| 1212062 | Trzyciąż (2)     | 9645,5 | 4411,7 | 4411,7 | 4411,7 | 4411,7 | 4411,7 | 4411,7 | 4411,7 | 5126   | 5126   | 5126   | 5126   | 5126   | 5126   | 5126   |
| 1214012 | Koniusza (2)     | 0      | 0      | 0      | 0      | 0      | 0      | 0      | 0      | 0      | 0      | 0      | 0      | 0      | 0      | 0      |
| 1214022 | Koszyce (2)      | 6412   | 6412   | 6412   | 6412   | 6412   | 6412   | 6412   | 6412   | 6412   | 6412   | 6596   | 6596   | 6596   | 6596   | 6596   |
| 1214032 | Nowe Brzesko (-  | -      | -      | -      | -      | -      | -      | -      | -      | -      | -      | -      | -      | -      | -      | -      |
| 1214053 | Proszowice (3)   | 0      | 0      | 0      | 0      | 0      | 0      | 0      | 0      | 0      | 0      | 0      | 0      | 0      | 0      | 0      |
| 1218022 | Brzeźnica (2)    | 0      | 0      | 0      | 0      | 0      | 0      | 0      | 0      | 0      | 0      | 0      | 0      | 0      | 0      | 0      |
| 1218033 | Kalwaria Zebrzy  | 0      | 0      | 0      | 0      | 0      | 0      | 0      | 0      | 0      | 0      | 0      | 0      | 0      | 0      | 0      |
| 1218042 | Lanckorona (2)   | 0      | 0      | 0      | 0      | 0      | 0      | 0      | 0      | 0      | 0      | 0      | 0      | 0      | 0      | 0      |
| 1218072 | Stryszów (2)     | 0      | 0      | 0      | 0      | 0      | 0      | 0      | 0      | 0      | 0      | 0      | 0      | 0      | 0      | 0      |
| 1218093 | Wadowice (3)     | 0      | 0      | 2050   | 2050   | 2050   | 2050   | 2050   | 2050   | 2050   | 2050   | 2093,1 | 2093,1 | 2093,1 | 2093,1 | 2093,1 |
| 1219012 | Biskupice (2)    | 0      | 0      | 0      | 0      | 0      | 0      | 0      | 0      | 0      | 0      | 0      | 0      | 0      | 0      | 0      |
| 1219022 | Gdów (2)         | 0      | 0      | 44,1   | 44,1   | 44,1   | 44,1   | 44,1   | 44,1   | 44,1   | 44,1   | 45,3   | 45,3   | 45,3   | 45,2   | 45,2   |
| 1219032 | Kłaj (2)         | 54     | 54     | 54     | 54     | 54     | 54     | 54     | 54     | 29,9   | 29,9   | 29,9   | 29,9   | 29,9   | 29,9   | 29,9   |
| 1219043 | Niepołomice (3)  | 3,5    | 3,5    | 3,5    | 3,5    | 3,5    | 3,5    | 3,5    | 3,5    | 3,5    | 3,5    | 3,5    | 3,5    | 3,5    | 3,5    | 3,5    |
| 1219053 | Wieliczka (3)    | 0      | 0,1    | 36     | 36     | 37     | 37     | 118    | 118    | 80     | 93,2   | 93,2   | 93,2   | 93,2   | 59,1   | 59,1   |
| 1261011 | Kraków (1)       | 6477,8 | 4341,1 | 4341,1 | 4338,8 | 4338,8 | 4338,8 | 4338,8 | 4396   | 4893,2 | 4893,2 | 4836   | 4839,6 | 4855,6 | 4855,6 | 4873,2 |
| 1405011 | Milanówek (1)    | 1343   | 2609   | 2609   | 2609   | 2609   | 1266   | 1266   | 1266   | 1266,9 | 1276,9 | 1276,9 | 1276,9 | 1276,9 | 1276,9 | 1276,9 |
| 1405021 | Podkowa Leśna    | 14,9   | 1010   | 1010   | 1010   | 1010   | 984,5  | 984,5  | 998,5  | 998,5  | 1010   | 1010   | 1010   | 986    | 986    | 1010   |
| 1405032 | Baranów (2)      | 0      | 0      | 0      | 0      | 0      | 0      | 0      | 0      | 0      | 0      | 0      | 0      | 0      | 0      | 0      |
| 1405043 | Grodzisk Mazow   | 1653,4 | 4307,4 | 4307,4 | 4307,4 | 4307,4 | 4307,4 | 2654   | 2654   | 2654   | 2654   | 2654   | 2654   | 2654   | 2654   | 2654   |
| 1405052 | Jaktorów (2)     | 2330   | 2364   | 2394   | 2364   | 2394   | 2394   | 2394   | 2360   | 2330   | 3362,6 | 3362,6 | 3362,6 | 3362,6 | 3362,6 | 3362,6 |
| 1405062 | Żabia Wola (2)   | 7400   | 7400   | 7400   | 7400   | 8216,3 | 8216,3 | 8219,5 | 8219,5 | 7403,2 | 350,2  | 350,2  | 350,2  | 350,2  | 350,2  | 313,2  |
| 1406032 | Chynów (2)       | 0      | 0      | 0      | 0      | 0      | 0      | 0      | 0      | 0      | 0      | 0      | 0      | 0      | 0      | 0      |
| 1406053 | Grójec (3)       | 7811   | 7811   | 7811   | 7478,9 | 7478,9 | 7478,9 | 7478,9 | 7478,9 | 7478,9 | 7478,9 | 7478,9 | 7478,9 | 7478,9 | 7478,9 | 7478,9 |
| 1406092 | Pniewy (2)       | 8075   | 13768  | 13768  | 14335  | 14335  | 8075   | 8075   | 8075   | 8075   | 8075   | 8075   | 8075   | 8075   | 8075   | 8075   |
| 1408011 | Legionowo (1)    | 2,5    | 2,5    | 2,5    | 2,5    | 2,5    | 2,5    | 2,5    | 0      | 0      | 0      | 0      | 0      | 0      | 0      | 0      |
| 1408022 | Jabłonna (2)     | 8631   | 8631   | 8631   | 8631   | 8631   | 8631   | 8631   | 8631   | 8631   | 8631   | 8631   | 8631   | 8631   | 8631   | 8631   |
| 1408032 | Nieporęt (2)     | 204,6  | 8903   | 8903   | 8903   | 8903   | 8907,6 | 8903   | 8903   | 8903   | 8903   | 8903   | 8903   | 8903   | 8903   | 8903   |
| 1408043 | Serock (3)       | 171,2  | 8019,5 | 8019,5 | 8018,4 | 8018,4 | 8017   | 8018,4 | 8018,4 | 8018,4 | 8016,4 | 8016,4 | 8016,4 | 8016,4 | 8016,4 | 8017   |

|         |                   |        |         |         |         |         |         |         |         |         |         |         |         |         |         |         |
|---------|-------------------|--------|---------|---------|---------|---------|---------|---------|---------|---------|---------|---------|---------|---------|---------|---------|
| 1408052 | Wieliszew (2) *   | 13     | 6671    | 6671    | 6671    | 6671    | 6671    | 6671    | 6671    | 6671    | 6671    | 6671    | 6671    | 6671    | 6671    | 6671    |
| 1412011 | Mińsk Mazowiec    | 0      | 0       | 0       | 0       | 0       | 0       | 0       | 0       | 0       | 0       | 0       | 0       | 0       | 0       | 0       |
| 1412042 | Cegłów (2)        | 6574   | 6574    | 6574    | 6574    | 6574    | 6574    | 6574    | 6574    | 6574    | 6574    | 6574    | 6574    | 6598,8  | 6598,8  | 6598,4  |
| 1412052 | Dębe Wielkie (2)  | 1192   | 1192    | 1192    | 1192    | 1192    | 1192    | 1192    | 1192    | 1192    | 1192    | 1192    | 1192    | 1192    | 1192    | 1192    |
| 1412062 | Dobre (2)         | 0      | 0       | 0       | 0       | 0       | 0       | 0       | 0       | 0       | 0       | 0       | 0       | 0       | 0       | 0       |
| 1412073 | Halinów (3) *     | 1500   | 3258    | 3258    | 3258    | 3258    | 3258    | 3258    | 3258    | 3258    | 3349,1  | 3349,1  | 3349,1  | 3349,1  | 3349,1  | 3349,1  |
| 1412082 | Jakubów (2)       | 337    | 337     | 337     | 337     | 337     | 337     | 337     | 337     | 337     | 337     | 337     | 337     | 337     | 337     | 337     |
| 1412093 | Kałużyn (3)       | 2648   | 2648    | 2648    | 2648    | 2648    | 2648    | 2648,2  | 2648,2  | 2648,2  | 2648,2  | 2648,2  | 2648,2  | 2648,2  | 2648,2  | 2648,2  |
| 1412102 | Latowicz (2)      | 0      | 0       | 0       | 0       | 0       | 0       | 0       | 0       | 0       | 0       | 0       | 0       | 0       | 0       | 0       |
| 1412112 | Mińsk Mazowiec    | 6195,1 | 6195,1  | 6195,1  | 6195,1  | 6195,1  | 6195,1  | 6195,1  | 6195,1  | 6195,1  | 6195,1  | 6195,1  | 6195,1  | 6195,1  | 6195,1  | 6195,1  |
| 1412122 | Mrozy (2)         | 8948,7 | 8948,7  | 8948,7  | 8948,7  | 8948,7  | 8948,7  | 8948,7  | 8948,7  | 8948,7  | 8948,7  | 8948,7  | 8948,7  | 8948,7  | 8948,7  | 8948,7  |
| 1412132 | Siennica (2)      | 3219   | 3219    | 3219    | 3219    | 3219    | 3219    | 3219    | 3219    | 3219    | 3219    | 3219    | 3219    | 3212,3  | 3212,3  | 3219    |
| 1412142 | Stanisławów (2)   | 0      | 0       | 0       | 0       | 0       | 0       | 0       | 0       | 0       | 0       | 0       | 0       | 0       | 0       | 0       |
| 1412151 | Sulejówek (1) *   | 0      | 301     | 2252    | 1951    | 1894    | 1894    | 1894    | 1894    | 1894    | 1894    | 1894    | 1894    | 1894    | 2232    | 1931    |
| 1414011 | Nowy Dwór Maz     | 0      | 572     | 572     | 572     | 572     | 572     | 572     | 572     | 572     | 572     | 572     | 572     | 572     | 572     | 572     |
| 1414022 | Czosnów (2)       | 4565,8 | 14258,4 | 14258,4 | 14258,4 | 14258,4 | 14241,4 | 14241,4 | 14241,4 | 14241,4 | 14243,1 | 14243,1 | 14243,1 | 14243,1 | 14243,1 | 14258,4 |
| 1414032 | Leoncin (2)       | 9679,1 | 10909,1 | 10909,1 | 10909,1 | 10909,1 | 10909,1 | 10909,1 | 10909,1 | 10909,1 | 10909,1 | 10909,1 | 10909,1 | 10909,1 | 10909,1 | 10909,1 |
| 1414052 | Pomiechówek (2)   | 42,6   | 8942    | 8942    | 8942    | 8942    | 8942    | 8942    | 8942    | 8942    | 8942    | 8942    | 8942    | 8942    | 8942    | 8942    |
| 1414063 | Zakroczym (3)     | 0      | 2693    | 3127,7  | 3127,7  | 3127,7  | 3127,7  | 3127,7  | 3127,7  | 3127,7  | 3127,7  | 3127,7  | 3127,7  | 3127,7  | 3127,7  | 3127,7  |
| 1417011 | Józefów (1)       | 105    | 1667    | 1667    | 1667    | 1667    | 1650,5  | 1650,5  | 1650,5  | 1650,5  | 1641,5  | 1641,5  | 1641,5  | 1640    | 1640    | 1640    |
| 1417021 | Otwock (1)        | 608,3  | 2185,9  | 2185,9  | 2185,9  | 2185,9  | 2079,9  | 2080,4  | 2080,4  | 2091,5  | 2052,3  | 2052,3  | 2052,3  | 2035,5  | 2035,5  | 2045,6  |
| 1417032 | Celestynów (2)    | 4624,4 | 6996,7  | 6996,7  | 6996,7  | 6998,7  | 8892    | 8891,8  | 8891,8  | 8891,8  | 8891,7  | 8891,7  | 8891,7  | 8891,7  | 8891,7  | 8892    |
| 1417043 | Karczew (3)       | 2137,8 | 4337,7  | 4405,4  | 4405,4  | 4405,4  | 4387,2  | 4387,2  | 4387,2  | 4387,2  | 4386,1  | 4386,1  | 4386,1  | 4387,1  | 4387,1  | 4387    |
| 1417052 | Kołbiel (2)       | 8487   | 8487    | 8488    | 8488    | 8488    | 8556,2  | 8556,2  | 8556,2  | 8556,2  | 8560,7  | 8561,4  | 8561,4  | 8585,7  | 8585,7  | 8585,6  |
| 1417082 | Wiązowna (2)      | 1872,5 | 7793,7  | 7793,7  | 7793,7  | 7794,4  | 6922,4  | 6922,4  | 6922,4  | 6922,5  | 6922,5  | 6922,5  | 6922,5  | 6924,6  | 6924,6  | 6924,6  |
| 1418013 | Góra Kalwaria (3) | 298    | 7703    | 7703    | 7703    | 7703    | 7703    | 7703    | 7703    | 7703    | 7703    | 7703    | 7703    | 7703    | 7703    | 7703    |
| 1418023 | Konstancin-Jezi   | 870,7  | 3853    | 3853    | 3853    | 3853    | 3853    | 3852,9  | 3852,9  | 3852,9  | 3849,9  | 3849,8  | 3849,8  | 3849,9  | 3849,9  | 3849,9  |
| 1418032 | Lesznowola (2)    | 0      | 1723    | 1723    | 1723    | 1723    | 1723    | 1723    | 1723    | 1723    | 1723    | 1723    | 1723    | 1723    | 1723    | 1723    |
| 1418043 | Piaseczno (3)     | 4714,1 | 9303,4  | 9305    | 9305    | 9305    | 8403,6  | 8403,3  | 8403,3  | 8403,3  | 8403    | 8403    | 8403    | 8403    | 8403    | 8403    |
| 1418052 | Prażmów (2)       | 1862,1 | 5728    | 5728    | 5728    | 5728    | 5728    | 5728    | 5728    | 5728    | 5728    | 5728    | 5728    | 5728    | 5728    | 5728    |
| 1418063 | Tarczyn (3) *     | 209    | 5183    | 5183    | 5183    | 5183    | 5183    | 5183    | 5183    | 5183    | 5183    | 5183    | 5183    | 5183    | 5183    | 5183    |
| 1421011 | Piastów (1)       | 0      | 0       | 0       | 0       | 0       | 0       | 0       | 0       | 0       | 0       | 0       | 0       | 0       | 0       | 0       |
| 1421021 | Pruszków (1)      | 0      | 96      | 174,3   | 174,3   | 96      | 96      | 96      | 96      | 96      | 96      | 96      | 96      | 96      | 96      | 96      |
| 1421033 | Brwinów (3)       | 5658,7 | 2668    | 2668    | 2668    | 2668    | 2668    | 2668    | 2668    | 2668    | 2668    | 2668    | 2668    | 2692,1  | 2692,1  | 2692,2  |
| 1421042 | Michałowice (2)   | 3004   | 1243,4  | 1243,4  | 1243,4  | 1243,4  | 1243,4  | 1243,4  | 1243,4  | 1243,4  | 1746,4  | 1746,4  | 1746,4  | 1746,4  | 1746,4  | 1746,4  |
| 1421052 | Nadarzyn (2)      | 39,7   | 3302    | 3302    | 3302    | 3302    | 3302    | 3302    | 3302    | 3302    | 3302    | 3302    | 3302    | 3302    | 3302    | 3302    |
| 1421062 | Raszyn (2)        | 110    | 1208    | 1208    | 1208    | 1208    | 1208    | 1208    | 1208    | 1208    | 1208    | 1208    | 1208    | 1208    | 1208    | 1217,3  |
| 1428011 | Sochaczew (1)     | 0      | 0       | 0       | 0       | 0       | 0       | 0       | 0       | 0       | 0       | 0       | 0       | 0       | 0       | 0       |

|         |                       |        |         |         |         |         |         |         |         |         |         |         |         |         |         |         |
|---------|-----------------------|--------|---------|---------|---------|---------|---------|---------|---------|---------|---------|---------|---------|---------|---------|---------|
| 1428022 | Brochów (2) *         | 4976,9 | 11863,5 | 11863,5 | 11863,5 | 11863,5 | 11863,5 | 11863,5 | 11863,5 | 11863,5 | 11863,5 | 11863,5 | 11863,5 | 11863,5 | 11863,5 | 11863,5 |
| 1428052 | Nowa Sucha (2)        | 0      | 0       | 1,5     | 1,5     | 1,5     | 1,5     | 1,5     | 1,5     | 1,5     | 1,5     | 1,5     | 1,5     | 1,5     | 1,5     | 1,5     |
| 1428072 | Sochaczew (2)         | 850    | 850     | 850     | 850     | 850     | 850     | 850     | 850     | 850     | 0       | 0       | 0       | 0       | 0       | 0       |
| 1428082 | Teresin (2)           | 0      | 0       | 1,8     | 1,8     | 1,8     | 1,8     | 1,8     | 1,8     | 1,8     | 1,8     | 1,8     | 1,8     | 1,8     | 1,8     | 1,8     |
| 1432013 | Blonie (3)            | 237,2  | 639,2   | 639,2   | 639,2   | 639,2   | 639,2   | 639,2   | 639,2   | 402     | 402     | 402     | 402     | 402     | 402     | 402     |
| 1432022 | Izabelin (2)          | 5615,5 | 5617,6  | 5617,6  | 5617,6  | 5617,6  | 5617,6  | 5617,6  | 5617,6  | 5617,6  | 5581,6  | 5581,6  | 5581,6  | 5581,6  | 5581,6  | 5581,6  |
| 1432032 | Kampinos (2)          | 3233,8 | 5241,4  | 5241,4  | 5241,4  | 5241,4  | 5241,4  | 5241,4  | 5241,4  | 5241,4  | 5241,4  | 5241,4  | 5241,4  | 5241,4  | 5241,4  | 5241,4  |
| 1432042 | Leszno (2)            | 6855,8 | 8704,3  | 8704,3  | 8704,3  | 8704,3  | 8704,3  | 8704,3  | 8704,3  | 8704,3  | 8704,3  | 8704,3  | 8704,3  | 8704,3  | 8704,3  | 8704,3  |
| 1432053 | Łomianki (3)          | 581,2  | 2791,7  | 2791,7  | 2791,7  | 2791,7  | 2791,7  | 2791,7  | 2791,7  | 2791,7  | 2791,7  | 2791,7  | 2791,7  | 2791,7  | 2791,7  | 2791,7  |
| 1432063 | Ożarów Mazowski (2)   | 189,4  | 342     | 342,8   | 341,8   | 341,8   | 341,8   | 341,9   | 341,9   | 203     | 203     | 203     | 203     | 203     | 203     | 203     |
| 1432072 | Stare Babice (2)      | 1095   | 2010,1  | 2010,1  | 2010,1  | 2010,1  | 2010,1  | 2009,5  | 2009,5  | 2009,5  | 2009,5  | 2009,5  | 2009,5  | 2009,5  | 2009,6  | 2010,1  |
| 1434011 | Kobyłka (1)           | 0      | 524     | 524     | 524     | 524     | 524     | 524     | 524     | 524     | 524     | 524     | 524     | 553,4   | 553,4   | 553,3   |
| 1434021 | Marki (1)             | 43,8   | 1826    | 1826    | 1826    | 1826    | 1826    | 1826    | 1826    | 1826    | 1826    | 1826    | 1826    | 1826,1  | 1826,1  | 1826    |
| 1434031 | Ząbki (1)             | 0      | 324     | 324     | 324     | 324     | 324     | 324     | 324     | 324     | 324     | 324     | 324     | 324     | 324     | 324     |
| 1434041 | Zielonka (1)          | 0      | 6066    | 6066    | 6066    | 6066    | 6066    | 6066    | 6066    | 6066    | 5974,9  | 5974,9  | 5974,9  | 5974,9  | 6094,9  | 6094,9  |
| 1434052 | Dąbrówka (2)          | 0      | 0       | 0       | 0       | 0       | 0       | 0       | 0       | 0       | 0       | 0       | 0       | 0       | 0       | 0       |
| 1434072 | Klembów (2)           | 50,4   | 50,4    | 50,4    | 51,2    | 51,2    | 51,2    | 51,2    | 51,2    | 51,2    | 51,2    | 51,2    | 51,2    | 51,3    | 51,3    | 51,2    |
| 1434082 | Poświętne (2)         | 0      | 0       | 0       | 0       | 0       | 0       | 0       | 0       | 0       | 0       | 0       | 0       | 0       | 0       | 0       |
| 1434093 | Radzymin (3)          | 7180   | 6816    | 6816    | 6816    | 6816    | 6816    | 6816    | 6816    | 6816    | 6816    | 6816    | 6816    | 6926    | 6926    | 6926    |
| 1434113 | Tłuszcz (3)           | 0      | 0       | 0       | 0       | 0       | 0       | 0       | 0       | 0       | 0       | 0       | 0       | 0       | 0       | 0       |
| 1434123 | Wołomin (3)           | 29,3   | 3278    | 3278    | 3278    | 3278    | 3278    | 3278    | 3278    | 3278    | 3278    | 3278    | 3278    | 3278    | 3278    | 3278    |
| 1435042 | Somianka (2)          | 4,6    | 4,6     | 4,6     | 4,6     | 4,6     | 4,6     | 4,6     | 4,6     | 4,6     | 4,6     | 9,2     | 9,2     | 9,2     | 4,6     | 4,6     |
| 1435053 | Wyszków (3)           | 0      | 0       | 0       | 0       | 0       | 0       | 0       | 0       | 0       | 0       | 0       | 0       | 0       | 0       | 0       |
| 1435062 | Zabrodzie (2)         | 0      | 0       | 0       | 0       | 0       | 0       | 0       | 0       | 0       | 0       | 0       | 0       | 0       | 0       | 0       |
| 1438011 | Żyrardów (1)          | 0      | 0       | 4,6     | 2,2     | 2,2     | 2,2     | 2,2     | 2,2     | 4,6     | 4,6     | 4,6     | 4,6     | 4,6     | 4,6     | 4,6     |
| 1438023 | Mszczonów (3)         | 4700   | 4725,2  | 4725,2  | 4725,2  | 4725,2  | 4725,2  | 4725,2  | 4725,2  | 4719,4  | 4700    | 4700    | 4700    | 4700    | 4700    | 4700    |
| 1438032 | Puszcza Mariańska (2) | 8800   | 8800    | 8832,7  | 8831    | 8831    | 8831    | 8855,6  | 8855,6  | 8867,5  | 8929,9  | 8929,9  | 8929,9  | 8843    | 8843    | 8842,9  |
| 1438042 | Radziejowice (2)      | 6000   | 6000    | 6000    | 6000    | 6000    | 6000    | 6000    | 6000    | 6000    | 6439    | 6439    | 6439    | 6439    | 6439    | 6439    |
| 1438052 | Wisłok (2)            | 6400   | 6400    | 6447,4  | 6447,8  | 6447,8  | 6447,8  | 6447,8  | 6448,7  | 6447,4  | 12375,8 | 12375,8 | 12375,8 | 12375,8 | 12375,8 | 12375,8 |
| 1465011 | M.st.Warszawa         | 2683,4 | 9858,7  | 9858,7  | 9858,7  | 9858,7  | 10562,7 | 12209,5 | 12208,6 | 12140,4 | 12028,9 | 12028,9 | 12028,2 | 12031,6 | 12031,6 | 12194,9 |
| 2204011 | Pruszcz Gdański (2)   | 2,1    | 2,1     | 2,1     | 2,1     | 2,1     | 2,1     | 2,1     | 2,1     | 2,1     | 2,1     | 2,1     | 2,1     | 2,1     | 2,1     | 2,1     |
| 2204022 | Cedry Wielkie (2)     | 12403  | 12403   | 12403   | 12403   | 12403   | 12403   | 12403   | 12403   | 12403   | 12403   | 12403   | 12403   | 12403   | 12403   | 12403   |
| 2204032 | Kolbudy (2) *         | 3250   | 3250,6  | 3250    | 3250,6  | 3250    | 3253,6  | 3253,6  | 3253,6  | 3253,6  | 3253,6  | 3254,2  | 3254,2  | 3254,2  | 3253,6  | 3253,6  |
| 2204042 | Pruszcz Gdański (2)   | 5352,5 | 5325    | 5325    | 5325    | 5325    | 5325    | 5325    | 5325    | 5325    | 5325    | 5325    | 5325    | 5325    | 5325    | 5325    |
| 2204052 | Przywidz (2)          | 7896,5 | 7892    | 7892    | 7892    | 7892    | 7892    | 7892    | 7892    | 7892    | 7892    | 7892    | 7892    | 7892    | 7902,9  | 7902,9  |
| 2204062 | Pszczółki (2)         | 1375   | 1375    | 1375    | 1375    | 1375    | 1375    | 1375    | 1375    | 1375    | 1375    | 1375    | 1375    | 1375    | 1375    | 1375    |
| 2204072 | Suchy Dąb (2)         | 8498   | 8498    | 8498    | 8498    | 8498    | 8498    | 8498    | 8498    | 8498    | 8498    | 8498    | 8498    | 8498    | 8498    | 8498    |
| 2204082 | Trąbki Wielkie (2)    | 95     | 95      | 95      | 105,4   | 105,4   | 105,4   | 105,4   | 105,4   | 105,4   | 105,4   | 105,4   | 105,4   | 105,4   | 105,4   | 105,4   |

|         |                 |        |        |        |         |         |         |         |         |         |         |         |         |         |         |         |
|---------|-----------------|--------|--------|--------|---------|---------|---------|---------|---------|---------|---------|---------|---------|---------|---------|---------|
| 2205012 | Chmielno (2)    | 7597   | 7597   | 7717   | 7717    | 7717    | 7717    | 7717    | 7717    | 7717    | 7717    | 7717    | 7717    | 7717    | 7717    | 7717    |
| 2205023 | Kartuzy (3)     | 14300  | 14300  | 14300  | 14458,5 | 14458,5 | 14458,5 | 14456,9 | 14456,9 | 14456,9 | 14456,9 | 14456,9 | 14456,9 | 14456,9 | 15116,1 | 15116,1 |
| 2205032 | Przodkowo (2)   | 131    | 131    | 131    | 131     | 131     | 131     | 131     | 131     | 131     | 131     | 131     | 131     | 131     | 131     | 131     |
| 2205042 | Sierakowice (2) | 9519   | 9519   | 9527   | 9527    | 9527    | 9527    | 9527    | 9527    | 9527    | 9527    | 9527    | 9527    | 9527    | 9527    | 9527    |
| 2205052 | Somonino (2)    | 3659   | 3659   | 3659   | 3659    | 3659    | 3659    | 3659    | 3659    | 3659    | 3659    | 3659    | 3659    | 3659    | 3659    | 3659    |
| 2205062 | Stężycza (2)    | 7616   | 7616   | 7708   | 7763,1  | 7763,1  | 7763,1  | 7763,1  | 7763,1  | 7763,1  | 7763,1  | 7763,1  | 7763,1  | 7763,1  | 7763,1  | 7708    |
| 2205072 | Sulęczyno (2)   | 8831   | 8831   | 8831   | 8831    | 8831    | 8831    | 8831    | 8831    | 8831    | 8831    | 8831    | 8831    | 8831    | 8831    | 8831    |
| 2205083 | Żukowo (3)      | 2475   | 2475   | 2475   | 2475    | 2475    | 2475    | 2475    | 2476,2  | 2476,2  | 2476,2  | 2476,2  | 2476,2  | 2476,2  | 2476,2  | 2476,2  |
| 2208011 | Lębork (1)      | 700    | 700    | 700    | 700     | 700     | 700     | 700     | 700     | 700     | 700     | 700     | 700     | 700     | 700     | 700     |
| 2208021 | Łeba (1)        | 691,7  | 691,6  | 691,6  | 671,5   | 671,5   | 671,5   | 671,5   | 671,5   | 660,9   | 660,9   | 660,9   | 660,9   | 660,9   | 660,9   | 660,9   |
| 2208032 | Cewice (2)      | 9431   | 9431   | 9431   | 9431    | 9431    | 9431    | 9431    | 9431    | 9431    | 9431    | 9446,3  | 9449,5  | 9449,5  | 9450,9  | 9450,9  |
| 2208042 | Nowa Wieś Lęb.  | 6000   | 6000   | 6000   | 6000    | 6000    | 6000    | 6000    | 6000    | 6000    | 6000    | 6214,4  | 6214,4  | 6214,4  | 6214,4  | 6214,4  |
| 2208052 | Wicko (2)       | 2435,9 | 2435,9 | 2435,9 | 2464,9  | 2464,9  | 2464,9  | 2464,9  | 2495,7  | 2535,7  | 2535,7  | 2535,7  | 2535,7  | 2535,7  | 2535,7  | 2535,7  |
| 2209011 | Malbork (1)     | 203    | 0      | 0      | 0       | 0       | 0       | 0       | 0       | 0       | 0       | 0       | 0       | 0       | 0       | 0       |
| 2209032 | Lichnowy (2)    | 507    | 507    | 507    | 507     | 507     | 507     | 507     | 507     | 507     | 507     | 507     | 507     | 507     | 507     | 507     |
| 2209042 | Malbork (2)     | 896    | 594    | 594    | 594     | 594     | 594     | 594     | 594     | 594     | 594     | 594     | 594     | 594     | 594     | 594     |
| 2209062 | Miloradz (2)    | 2057   | 1408   | 1408,1 | 1408,2  | 1408,2  | 1408,2  | 1408,2  | 1408,2  | 1408,2  | 1408,2  | 1408,2  | 1408,2  | 1408,2  | 1408,2  | 1408,2  |
| 2209073 | Nowy Staw (3)   | 412    | 1359   | 1359   | 1359    | 1359    | 1359    | 1359    | 1359    | 1359    | 1359    | 1359    | 1359    | 1359    | 1359    | 1359    |
| 2209082 | Stare Pole (2)  | 425    | 212    | 212    | 212     | 212     | 212     | 212     | 212     | 212     | 212     | 212     | 212     | 212     | 212     | 212     |
| 2210011 | Krynica Morska  | 2456   | 2456   | 2456   | 2456    | 2456    | 2456    | 2456    | 2456    | 2456    | 2456    | 2456    | 2456    | 2456    | 2456    | 2456    |
| 2210023 | Nowy Dwór Gda   | 5698   | 8895   | 8895   | 8895    | 8895    | 8895    | 8895    | 8895    | 8895    | 8895    | 8895    | 8895    | 8895    | 8895    | 8895    |
| 2210032 | Ostaszewo (2)   | 332    | 332    | 332    | 332     | 332     | 332     | 332     | 332     | 332     | 332     | 332     | 332     | 332     | 332     | 332     |
| 2210042 | Stegna (2)      | 173,6  | 2580,6 | 2580,6 | 2580,6  | 2580,6  | 2580,6  | 2580,6  | 2580,6  | 2580,6  | 2580,6  | 2580,6  | 2580,6  | 2580,6  | 2580,6  | 2580,6  |
| 2210052 | Sztutowo (2)    | 1954   | 2579   | 2579   | 2579    | 2579    | 2579    | 2579    | 2579    | 2579    | 2579    | 2579    | 2579    | 2579    | 2579    | 2579    |
| 2211011 | Hel (1)         | 2127   | 2127   | 2127   | 2127    | 2127    | 2127    | 2127    | 2127    | 2127    | 2127    | 2127    | 2127    | 2419,9  | 2419,9  | 2419,9  |
| 2211031 | Puck (1)        | 25     | 25     | 25     | 25      | 25      | 25      | 25      | 25      | 25      | 25      | 25      | 25      | 25      | 25      | 25      |
| 2211041 | Władysławowo (  | 2065   | 2065   | 2065   | 2065    | 2065    | 2065    | 2065    | 2065    | 2065    | 2065    | 2065    | 2065    | 2065    | 2065    | 2065    |
| 2211052 | Kosakowo (2)    | 357    | 357    | 357    | 357,3   | 357,3   | 357,3   | 357,3   | 357,3   | 357,3   | 357,3   | 357,3   | 357,3   | 357,3   | 357,3   | 357,3   |
| 2211062 | Krokowa (2)     | 11773  | 11773  | 11773  | 11774,7 | 11774,7 | 11774,7 | 11774,7 | 11774,8 | 11774,8 | 11774,8 | 11774,8 | 11774,8 | 11774,8 | 11774,8 | 11774,8 |
| 2211072 | Puck (2)        | 8830   | 8830   | 8830   | 8830    | 8830    | 8830    | 8830    | 8830    | 8830    | 8830    | 8830    | 8830    | 8830    | 8830    | 8830    |
| 2214011 | Tczew (1)       | 0      | 0      | 0      | 0       | 0       | 0       | 0       | 0       | 0       | 0       | 0       | 0       | 0       | 0       | 0       |
| 2214023 | Gniew (3)       | 6537   | 6537   | 6537   | 6537    | 6537    | 6540,5  | 6540,5  | 6540,5  | 6557    | 6557    | 6557    | 6577    | 6577    | 6576,9  | 6577    |
| 2214032 | Morzeszczyn (2) | 350    | 350    | 350    | 350     | 350     | 350     | 350     | 350     | 350     | 350     | 350     | 350     | 350     | 350     | 350     |
| 2214043 | Pelplin (3)     | 375    | 375    | 375    | 375     | 375     | 375     | 375     | 375     | 375     | 375     | 375     | 375     | 375     | 375     | 375     |
| 2214052 | Subkowy (2)     | 0      | 0      | 0      | 0       | 0       | 0       | 0       | 0       | 0       | 0       | 0       | 0       | 0       | 0       | 0       |
| 2214062 | Tczew (2)       | 1550   | 1550   | 1550   | 1550    | 1550    | 1550    | 1550    | 1550    | 1550    | 1550    | 1550    | 1550    | 1550    | 1550    | 1550    |
| 2215011 | Reda (1)        | 0      | 0      | 0      | 2250    | 2250    | 2250    | 2250    | 2250    | 2250    | 2250    | 2250    | 2250    | 2250    | 2250    | 2250    |
| 2215021 | Rumia (1)       | 2100   | 2100   | 2100   | 2100    | 2100    | 2100    | 2100    | 2100    | 2100    | 2100    | 2100    | 2100    | 2100    | 2100    | 2100    |

|         |                  |        |        |         |         |         |         |         |         |         |         |         |         |         |         |
|---------|------------------|--------|--------|---------|---------|---------|---------|---------|---------|---------|---------|---------|---------|---------|---------|
| 2215031 | Wejherowo (1)    | 1333   | 1333   | 1333    | 1333    | 1333    | 1333    | 1333    | 1333    | 1333    | 1333    | 1333    | 1333    | 1333    | 1333    |
| 2215042 | Choczewo (2)     | 6509,2 | 6509,2 | 6509,2  | 6509,2  | 6509,2  | 6509,2  | 6509,2  | 6509,2  | 6509,2  | 6549,8  | 6549,8  | 6549,8  | 6549,8  | 6549,8  |
| 2215052 | Gniewino (2)     | 8484   | 8484   | 8484    | 8484    | 8484    | 8484    | 8484    | 8484    | 8484    | 8484    | 8484    | 8484    | 8484    | 8484    |
| 2215062 | Linia (2)        | 3838   | 3838   | 3982    | 3987,1  | 3987,1  | 3987,1  | 3987,1  | 3987,1  | 3987,1  | 3987,1  | 3987,1  | 3987,1  | 3987,1  | 3987,1  |
| 2215072 | Luzino (2)       | 3850   | 3850   | 3850    | 3855    | 3855    | 3855    | 3855    | 3855    | 3855    | 3855    | 3855    | 3858,9  | 3858,9  | 3858,9  |
| 2215082 | Łęczyce (2)      | 14501  | 14501  | 14501   | 14516,9 | 14516,9 | 14521,9 | 14521,8 | 14527,2 | 14527,2 | 14527,2 | 14527,2 | 14528,3 | 14528,3 | 14528,3 |
| 2215092 | Szemud (2)       | 2000   | 2000   | 2000    | 2000    | 2000    | 2000    | 2000    | 2007,3  | 2007,3  | 2007,3  | 2007,3  | 2007,3  | 2007,3  | 2007,3  |
| 2215102 | Wejherowo (2)    | 16350  | 16350  | 15968   | 13718   | 13718   | 13718   | 13718   | 13718   | 13718   | 13718   | 13718   | 13718   | 13718   | 13721,5 |
| 2261011 | Gdańsk (1)       | 9220,2 | 6004,2 | 6004,2  | 6004,2  | 6004,2  | 6005,2  | 6005,2  | 6005,3  | 6005,3  | 6005,3  | 6005,3  | 6013,6  | 6471,3  | 6469,7  |
| 2262011 | Gdynia (1)       | 4320   | 4320   | 4320    | 4336,2  | 4336,8  | 4338,6  | 4338,6  | 4338,6  | 4338,6  | 4338,1  | 4338,1  | 4338,1  | 4338,1  | 4359,2  |
| 2264011 | Sopot (1)        | 704    | 704    | 704     | 704     | 704,9   | 704,9   | 704,9   | 704,9   | 704,9   | 704,9   | 704,9   | 704,9   | 704,9   | 704,9   |
| 3003011 | Gnieszno (1)     | 0      | 0      | 0       | 0       | 0       | 0       | 0       | 0       | 0       | 0       | 0       | 0       | 0       | 0       |
| 3003023 | Czarniejewo (3)  | 22,5   | 22,5   | 22,5    | 22,5    | 22,5    | 22,5    | 22,5    | 27,8    | 27,8    | 27,8    | 27,7    | 22,5    | 22,5    | 27,8    |
| 3003032 | Gnieszno (2)     | 0      | 0      | 0       | 0       | 0       | 0       | 0       | 0       | 0       | 0       | 0       | 0       | 0       | 0       |
| 3003042 | Kiszkowo (2)     | 2068,2 | 2068,2 | 2809,5  | 2809,5  | 2809,5  | 2809,5  | 2809,5  | 2809,5  | 2809,5  | 2809,5  | 2783    | 2783    | 2783    | 2783    |
| 3003062 | Łubowo (2)       | 2235   | 2235   | 2823,5  | 2823,5  | 2823,5  | 2823,5  | 2823,5  | 2823,5  | 2823,5  | 2823,5  | 2823,5  | 2823,5  | 2823,5  | 2823,5  |
| 3005012 | Granowo (2)      | 0      | 0      | 0       | 0       | 0       | 0       | 0       | 0       | 0       | 0       | 0       | 0       | 0       | 0       |
| 3005023 | Grodzisk Wielki  | 33,6   | 33,6   | 33,6    | 33,6    | 33,6    | 33,6    | 33,6    | 33,6    | 33,6    | 33,6    | 33,6    | 33,6    | 33,6    | 33,6    |
| 3011011 | Kościan (1)      | 0      | 0      | 0       | 0       | 0       | 0       | 0       | 0       | 0       | 0       | 0       | 0       | 0       | 0       |
| 3011023 | Czempiń (3)      | 2700   | 2700   | 2700    | 2700    | 2700    | 2700    | 2700    | 2700    | 2700    | 2700    | 2797,8  | 2797,8  | 2797,8  | 2823    |
| 3011032 | Kościan (2)      | 10800  | 10800  | 10853,2 | 10853,2 | 10853,2 | 10853,2 | 10853,2 | 10853,2 | 10800   | 10800   | 10800,8 | 10800,8 | 10800,8 | 7601,4  |
| 3015043 | Nowy Tomysł (3)  | 0      | 0      | 0       | 0       | 0       | 0       | 0       | 821,8   | 821,8   | 821,8   | 821,8   | 821,8   | 821,8   | 821,8   |
| 3015053 | Opalenica (3)    | 8,1    | 8,1    | 8,1     | 8,1     | 8,1     | 8,1     | 8,1     | 8,1     | 8,1     | 8,1     | 8,1     | 8,1     | 8,1     | 7,7     |
| 3016013 | Oborniki (3)     | 4,1    | 4,1    | 4,1     | 4,1     | 4,1     | 4,1     | 6,4     | 6,4     | 6,4     | 6,4     | 4,1     | 6,4     | 6,4     | 3,8     |
| 3016023 | Rogoźno (3)      | 9038,8 | 9038,8 | 9038,8  | 9043,3  | 9043,3  | 9043,3  | 9045,2  | 9045,2  | 9031,9  | 9031,9  | 9036,4  | 9061,5  | 9061,5  | 9031,8  |
| 3021011 | Luboń (1)        | 0      | 0      | 0       | 0       | 0       | 0       | 0       | 0       | 0       | 0       | 0       | 0       | 0       | 2,2     |
| 3021021 | Puszczykowo (1)  | 703,2  | 703,2  | 703,2   | 703,1   | 703,1   | 703,1   | 703     | 703     | 703     | 703     | 703     | 703     | 703     | 703     |
| 3021033 | Buk (3)          | 0      | 0      | 0       | 0       | 0       | 0       | 0       | 0       | 0       | 0       | 0       | 0       | 0       | 0       |
| 3021042 | Czerwonak (2)    | 2465,5 | 2465,5 | 2465,5  | 2465,5  | 2465,5  | 2465,5  | 2465,5  | 2465,5  | 2832,7  | 2832,7  | 2832,7  | 2832,7  | 2832,7  | 4111    |
| 3021052 | Dopiewo (2)      | 219,4  | 181    | 181     | 183,8   | 183,8   | 274,6   | 274,6   | 274,6   | 274,6   | 274,6   | 205     | 205     | 205     | 222,2   |
| 3021062 | Kleszczewo (2)   | 0      | 0      | 0       | 0       | 0       | 0       | 0       | 0       | 0       | 0       | 0       | 0       | 0       | 0       |
| 3021072 | Komorniki (2)    | 1881,6 | 1881,6 | 2017,1  | 1979,7  | 1979,7  | 1944,7  | 1944,7  | 1944,7  | 1944,7  | 1944,7  | 1944,7  | 1944,7  | 1944,7  | 1942,5  |
| 3021083 | Kostrzyn (3)     | 454    | 454    | 454     | 454     | 454     | 454     | 454     | 454     | 454     | 254     | 245     | 245     | 245     | 254     |
| 3021093 | Kórnik (3)       | 14100  | 14404  | 14404   | 14404   | 14404   | 14404   | 14404   | 14404   | 14404,7 | 14404,7 | 14404,7 | 14454,6 | 14454,6 | 8411,6  |
| 3021103 | Mosina (3)       | 1800,5 | 9389,7 | 9389,7  | 9387,7  | 9387,7  | 9387,7  | 9387,7  | 9387,9  | 9387,8  | 9209,4  | 9223,6  | 8807,6  | 8986    | 8974,2  |
| 3021113 | Murowana Goślina | 4529   | 4529   | 4529    | 4529    | 4529    | 4529    | 4571,6  | 4577,2  | 6199,9  | 6199,9  | 6226,2  | 6209,5  | 6227,4  | 6183,9  |
| 3021123 | Pobiedziska (3)  | 2470,8 | 2470,8 | 2807    | 2807    | 2807    | 2807    | 2807    | 2815,2  | 3697    | 3697    | 3706,6  | 3706,6  | 3706,6  | 3705,5  |
| 3021132 | Rokietnica (2)   | 0      | 0      | 0       | 0       | 0       | 0       | 0       | 0       | 0       | 1150    | 1150    | 1150    | 1150    | 1150    |

|         |                |         |         |         |         |         |         |         |         |        |        |        |        |        |        |         |
|---------|----------------|---------|---------|---------|---------|---------|---------|---------|---------|--------|--------|--------|--------|--------|--------|---------|
| 3021143 | Stęszew (3)    | 3394,7  | 3394,7  | 3394,7  | 3397,6  | 3397,6  | 3397,6  | 3397,7  | 3397,7  | 3397,7 | 3397,7 | 3397,7 | 3397,7 | 3397,7 | 3397,7 | 3397,7  |
| 3021152 | Suchy Las (2)  | 7555    | 7555    | 7555    | 7555    | 7555    | 7650,2  | 7650,2  | 7650,2  | 7650,2 | 7650,2 | 7650,2 | 7650,2 | 7650,2 | 7650,3 | 7650,3  |
| 3021163 | Swarzędz (3)   | 0       | 0       | 0       | 0       | 0       | 0       | 0       | 0       | 0      | 0      | 0      | 0      | 0      | 0      | 0       |
| 3021172 | Tarnowo Podgór | 0       | 1190,1  | 1190,1  | 1190,1  | 1190,1  | 1190,1  | 1190,1  | 1190,1  | 1190,1 | 1190,1 | 1190,1 | 1190,1 | 1190,1 | 1099,6 | 1099,6  |
| 3024022 | Duszniki (2)   | 0,8     | 0,8     | 0,8     | 0,8     | 0,8     | 0,8     | 0,8     | 0,8     | 0,8    | 0,8    | 0,8    | 0,8    | 0,8    | 0,8    | 0,8     |
| 3024032 | Kaźmierz (2)   | 54      | 54      | 54      | 54      | 54      | 54      | 67,4    | 67,4    | 67,4   | 67,4   | 69,1   | 67,3   | 67,3   | 67,4   | 67,4    |
| 3024073 | Szamotuły (3)  | 0       | 0       | 0       | 0       | 0       | 0       | 0       | 0       | 0      | 0      | 0      | 0      | 0      | 0      | 0       |
| 3025012 | Dominowo (2)   | 21,4    | 21,4    | 21,4    | 21,4    | 21,4    | 21,4    | 21,4    | 21,4    | 21,4   | 21,4   | 0      | 0      | 0      | 0      | 0       |
| 3025043 | Środa Wielkopo | 120,3   | 120,3   | 120,3   | 120,3   | 120,3   | 120,3   | 120,3   | 120,3   | 120,3  | 120,3  | 120,3  | 120,3  | 120,3  | 120,3  | 120,3   |
| 3025052 | Zaniemyśl (2)  | 0       | 0       | 0       | 0       | 9,3     | 18,5    | 18,5    | 18,5    | 18,5   | 18,5   | 18,5   | 18,5   | 18,5   | 18,5   | 18,5    |
| 3026012 | Brodnica (2)   | 0       | 3182    | 3182    | 3182    | 3182    | 3182    | 3182    | 3182    | 3182   | 3182   | 3182   | 3256,8 | 3256,8 | 3256,8 | 3283,6  |
| 3026043 | Śrem (3)       | 12025,7 | 4937,7  | 4961,3  | 4961,3  | 5042,2  | 5042,3  | 5042,4  | 5042,4  | 5042,4 | 5042,4 | 5184,9 | 3920,7 | 3928,3 | 5258,5 | 5272,6  |
| 3028011 | Wągrowiec (1)  | 1450    | 1450    | 1450    | 1450    | 1450    | 1450    | 1450    | 1450    | 1450   | 1450   | 1450   | 1480,4 | 1480,4 | 1450   | 1450    |
| 3028053 | Skoki (3)      | 1954,7  | 1954,7  | 1954,7  | 1954,7  | 1954,7  | 1954,7  | 1954,7  | 1954,7  | 1093,4 | 1098,7 | 1098,8 | 1098,8 | 1098,8 | 1100,7 | 1100,7  |
| 3028072 | Wągrowiec (2)  | 11440,1 | 11440,1 | 11620,1 | 11615,6 | 11615,6 | 11371,5 | 11209,5 | 11209,5 | 11208  | 11208  | 11199  | 11199  | 11199  | 11199  | 11247,3 |
| 3030033 | Nekla (3) *    | -       | -       | -       | -       | 0       | 0       | 0       | 0       | 0      | 0      | 36     | 36     | 36     | 36     | 36      |
| 3030053 | Września (3)   | 0       | 0       | 0       | 0       | 0       | 0       | 0       | 0       | 0      | 0      | 0      | 0      | 0      | 0      | 0       |
| 3064011 | Poznań (1)     | 7403    | 7403    | 7403    | 7448    | 7448    | 7448    | 7448    | 7448    | 7448   | 56     | 56     | 56     | 171,9  | 354,6  | 354,6   |

Source: data from Poland's Central Statistical Office (GUS)
