# Supplementary material
Source: MDPI journal article supplement (https://www.mdpi.com/2071-1050/10/3/837)
Supplement: s1 [file s1]

| KOD GUS | Municipality         | Economic entities including natural persons-for 2002–2010 [entities/ 10 thous. population of working age] |         |         |         |         |         |         |         |         |
|---------|----------------------|-----------------------------------------------------------------------------------------------------------|---------|---------|---------|---------|---------|---------|---------|---------|
|         |                      | 2002                                                                                                      | 2003    | 2004    | 2005    | 2006    | 2007    | 2008    | 2009    | 2010    |
| 0214011 | Oleśnica (1)         | 1 463,2                                                                                                   | 1 500,0 | 1 466,4 | 1 470,5 | 1 471,3 | 1 522,3 | 1 558,6 | 1 636,6 | 1 710,9 |
| 0214032 | Dobroszyce (2)       | 1 224,2                                                                                                   | 1 269,5 | 1 273,7 | 1 265,1 | 1 269,1 | 1 287,6 | 1 346,0 | 1 387,5 | 1 431,6 |
| 0214062 | Oleśnica (2)         | 977,9                                                                                                     | 1 025,2 | 994,5   | 979,3   | 1 020,0 | 1 091,6 | 1 173,9 | 1 221,2 | 1 245,3 |
| 0215011 | Oława (1)            | 1 710,1                                                                                                   | 1 835,9 | 1 749,9 | 1 705,0 | 1 678,1 | 1 710,7 | 1 758,4 | 1 769,5 | 1 787,5 |
| 0215022 | Domaniów (2)         | 979,5                                                                                                     | 1 003,1 | 900,5   | 834,8   | 840,8   | 886,1   | 927,3   | 975,0   | 1 009,6 |
| 0215033 | Jelcz-Laskowice (3)  | 1 185,6                                                                                                   | 1 222,0 | 1 240,0 | 1 190,6 | 1 183,9 | 1 221,0 | 1 286,1 | 1 286,3 | 1 332,3 |
| 0215042 | Oława (2)            | 930,4                                                                                                     | 974,5   | 958,2   | 943,7   | 929,6   | 956,1   | 1 008,7 | 1 045,1 | 1 094,3 |
| 0217012 | Borów (2)            | 854,5                                                                                                     | 899,5   | 925,6   | 847,7   | 897,1   | 951,4   | 1 001,2 | 1 025,6 | 1 041,8 |
| 0218012 | Kostomłoty (2)       | 851,4                                                                                                     | 866,9   | 849,1   | 839,0   | 868,1   | 907,3   | 966,1   | 995,6   | 1 035,1 |
| 0218032 | Miękinia (2)         | 1 098,7                                                                                                   | 1 141,7 | 1 158,2 | 1 159,5 | 1 209,1 | 1 277,6 | 1 344,1 | 1 438,8 | 1 436,3 |
| 0218043 | Środa Śląska (3)     | 1 564,2                                                                                                   | 1 616,9 | 1 596,8 | 1 545,9 | 1 547,3 | 1 582,9 | 1 648,1 | 1 662,2 | 1 721,5 |
| 0220013 | Oborniki Śląskie (3) | 1 585,9                                                                                                   | 1 644,5 | 1 625,0 | 1 582,5 | 1 578,1 | 1 635,6 | 1 718,1 | 1 746,5 | 1 822,4 |
| 0220023 | Prusice (3) *        | 928,7                                                                                                     | 942,3   | 923,1   | 923,1   | 918,4   | 967,7   | 1 045,0 | 1 079,0 | 1 105,6 |
| 0220033 | Trzebnica (3)        | 1 525,6                                                                                                   | 1 587,2 | 1 565,4 | 1 483,4 | 1 370,0 | 1 416,3 | 1 490,6 | 1 580,2 | 1 677,3 |
| 0220042 | Wisznia Mała (2)     | 1 275,0                                                                                                   | 1 346,6 | 1 365,0 | 1 423,4 | 1 436,2 | 1 500,4 | 1 621,7 | 1 661,8 | 1 665,6 |
| 0220052 | Zawonia (2)          | 945,9                                                                                                     | 1 004,2 | 930,7   | 791,0   | 791,5   | 904,6   | 1 005,4 | 1 053,3 | 1 115,2 |
| 0222013 | Brzeg Dolny (3)      | 1 107,7                                                                                                   | 1 153,6 | 1 149,3 | 1 156,3 | 1 114,2 | 1 105,0 | 1 145,0 | 1 193,3 | 1 247,7 |
| 0223012 | Czernica (2)         | 1 227,1                                                                                                   | 1 341,6 | 1 265,5 | 1 178,7 | 1 184,5 | 1 283,1 | 1 372,4 | 1 463,7 | 1 551,6 |
| 0223022 | Długoleka (2)        | 1 265,2                                                                                                   | 1 330,0 | 1 317,0 | 1 301,2 | 1 286,2 | 1 316,2 | 1 404,1 | 1 486,2 | 1 562,6 |
| 0223032 | Jordanów Śląski (2)  | 879,0                                                                                                     | 885,6   | 790,3   | 669,8   | 666,0   | 672,3   | 740,4   | 773,7   | 810,7   |
| 0223043 | Kąty Wrocławskie (3) | 1 358,8                                                                                                   | 1 408,6 | 1 351,0 | 1 312,7 | 1 350,2 | 1 424,8 | 1 497,9 | 1 592,4 | 1 619,3 |
| 0223052 | Kobierzyce (2)       | 1 317,3                                                                                                   | 1 409,1 | 1 394,6 | 1 369,8 | 1 417,1 | 1 542,2 | 1 645,2 | 1 782,2 | 1 874,6 |
| 0223062 | Mietków (2)          | 1 009,8                                                                                                   | 1 066,7 | 1 058,2 | 1 028,4 | 1 006,1 | 1 049,9 | 1 111,1 | 1 132,9 | 1 147,1 |
| 0223073 | Sobótka (3)          | 1 392,5                                                                                                   | 1 395,5 | 1 485,9 | 1 412,5 | 1 390,5 | 1 413,7 | 1 469,1 | 1 464,0 | 1 541,1 |
| 0223083 | Siechnice (3) *      | 1 516,5                                                                                                   | 1 600,0 | 1 584,9 | 1 548,2 | 1 522,0 | 1 540,0 | 1 584,1 | 1 645,7 | 1 699,6 |
| 0223092 | Żórawina (2)         | 1 298,0                                                                                                   | 1 333,9 | 1 365,8 | 1 291,6 | 1 260,7 | 1 256,4 | 1 370,5 | 1 386,1 | 1 433,2 |
| 0264011 | Wrocław (1)          | 2 209,3                                                                                                   | 2 247,7 | 2 222,0 | 2 182,6 | 2 186,1 | 2 217,5 | 2 273,6 | 2 333,4 | 2 442,8 |
| 0608011 | Lubartów (1)         | 1 366,6                                                                                                   | 1 402,7 | 1 391,5 | 1 413,6 | 1 409,4 | 1 426,3 | 1 433,6 | 1 412,4 | 1 460,8 |
| 0608072 | Lubartów (2)         | 767,3                                                                                                     | 796,5   | 723,4   | 735,1   | 779,0   | 775,9   | 818,0   | 855,3   | 885,5   |
| 0609013 | Bełżyce (3)          | 1 088,2                                                                                                   | 1 085,9 | 959,6   | 930,3   | 961,6   | 980,1   | 1 020,4 | 1 015,3 | 1 092,6 |
| 0609033 | Bychawa (3)          | 970,9                                                                                                     | 1 014,6 | 930,2   | 891,4   | 904,2   | 899,9   | 917,8   | 924,7   | 949,5   |
| 0609042 | Garbów (2)           | 832,7                                                                                                     | 877,4   | 811,3   | 794,2   | 799,8   | 814,9   | 836,4   | 846,2   | 902,3   |
| 0609052 | Głusk (2)            | 1 005,6                                                                                                   | 1 067,8 | 999,1   | 1 039,1 | 1 043,0 | 1 053,6 | 1 062,9 | 1 116,5 | 1 195,4 |
| 0609062 | Jabłonna (2)         | 786,1                                                                                                     | 838,6   | 773,4   | 806,5   | 841,5   | 823,3   | 850,4   | 862,3   | 900,5   |
| 0609072 | Jastków (2)          | 968,9                                                                                                     | 991,7   | 948,4   | 1 007,6 | 1 027,7 | 1 063,5 | 1 133,7 | 1 149,2 | 1 256,6 |
| 0609082 | Konopnica (2)        | 1 159,7                                                                                                   | 1 218,4 | 1 088,0 | 1 125,7 | 1 134,8 | 1 162,4 | 1 230,4 | 1 304,3 | 1 395,9 |

|         |                            |         |         |         |         |         |         |         |         |         |
|---------|----------------------------|---------|---------|---------|---------|---------|---------|---------|---------|---------|
| 0609102 | Niedzwica Duża (2)         | 930,7   | 956,6   | 836,9   | 812,3   | 817,6   | 868,0   | 934,9   | 985,6   | 1 072,6 |
| 0609112 | Niemce (2)                 | 886,9   | 901,5   | 837,5   | 840,7   | 854,2   | 893,5   | 952,6   | 1 006,3 | 1 108,2 |
| 0609122 | Strzyżewice (2)            | 809,8   | 858,8   | 825,7   | 825,1   | 873,9   | 912,2   | 945,3   | 952,1   | 1 042,1 |
| 0609132 | Wojciechów (2)             | 690,6   | 713,0   | 580,7   | 565,1   | 625,9   | 638,3   | 680,8   | 702,7   | 778,0   |
| 0609142 | Wólka (2)                  | 782,3   | 826,3   | 758,0   | 775,5   | 823,7   | 869,5   | 917,6   | 987,5   | 1 110,8 |
| 0610033 | Łączna (3)                 | 938,7   | 921,6   | 831,7   | 805,4   | 789,2   | 779,4   | 779,4   | 809,3   | 859,9   |
| 0610062 | Spiczyn (2)                | 862,1   | 857,7   | 710,3   | 743,6   | 745,9   | 776,8   | 800,5   | 831,1   | 855,7   |
| 0614083 | Nałęczów (3)               | 1 216,6 | 1 270,6 | 1 219,1 | 1 280,3 | 1 283,6 | 1 344,8 | 1 397,4 | 1 432,3 | 1 507,1 |
| 0617011 | Świdnik (1)                | 1 206,6 | 1 209,3 | 1 171,3 | 1 172,2 | 1 168,3 | 1 173,4 | 1 201,4 | 1 259,0 | 1 322,8 |
| 0617022 | Mełgiew (2)                | 1 070,6 | 1 103,8 | 995,0   | 972,9   | 977,8   | 958,9   | 1 020,4 | 1 034,9 | 1 096,9 |
| 0617033 | Piaski (3)                 | 923,3   | 937,1   | 830,4   | 867,5   | 887,6   | 880,7   | 869,4   | 914,5   | 952,7   |
| 0663011 | Lublin (1)                 | 1 651,2 | 1 681,6 | 1 653,0 | 1 662,5 | 1 671,6 | 1 635,4 | 1 673,2 | 1 721,3 | 1 818,4 |
| 1201011 | Bochnia (1)                | 1 753,1 | 1 794,4 | 1 706,3 | 1 688,4 | 1 570,4 | 1 594,1 | 1 596,2 | 1 641,6 | 1 710,4 |
| 1201022 | Bochnia (2)                | 914,2   | 950,1   | 936,8   | 934,1   | 851,3   | 881,5   | 913,5   | 965,3   | 1 028,6 |
| 1201032 | Drwinia (2)                | 692,7   | 722,1   | 685,7   | 667,4   | 632,3   | 656,9   | 696,7   | 729,1   | 789,7   |
| 1201052 | Łapanów (2)                | 819,9   | 899,6   | 838,8   | 822,0   | 822,4   | 846,7   | 886,2   | 938,8   | 987,4   |
| 1201063 | Nowy Wiśnicz (3)           | 1 010,7 | 1 044,2 | 980,2   | 921,3   | 882,3   | 925,0   | 975,7   | 1 014,0 | 1 080,8 |
| 1201072 | Rzezawa (2)                | 752,7   | 774,9   | 747,2   | 719,2   | 642,4   | 674,3   | 721,8   | 775,1   | 831,3   |
| 1201082 | Trzciana (2)               | 959,6   | 994,4   | 906,9   | 889,9   | 812,7   | 854,3   | 892,9   | 933,5   | 1 072,0 |
| 1201092 | Żegocina (2)               | 1 058,4 | 1 099,2 | 1 032,0 | 957,7   | 864,6   | 894,4   | 936,5   | 986,8   | 1 064,2 |
| 1206012 | Czernichów (2)             | 1 129,5 | 1 176,7 | 1 179,5 | 1 198,4 | 1 180,2 | 1 199,7 | 1 247,9 | 1 290,7 | 1 353,2 |
| 1206022 | Igołomia-Wawrzeńczyce (2)  | 763,9   | 793,5   | 781,4   | 779,8   | 836,3   | 846,1   | 876,2   | 915,8   | 955,9   |
| 1206032 | Iwanowice (2)              | 966,7   | 967,9   | 959,1   | 967,6   | 1 000,8 | 1 025,7 | 1 101,5 | 1 138,5 | 1 215,6 |
| 1206042 | Jerzmanowice-Przegonia (2) | 1 190,2 | 1 203,4 | 1 131,2 | 1 116,5 | 1 087,9 | 1 042,5 | 1 072,2 | 1 120,8 | 1 223,0 |
| 1206052 | Kocmyrzów-Luborzyca (2)    | 941,2   | 962,3   | 968,9   | 967,3   | 975,6   | 980,4   | 998,1   | 1 041,7 | 1 080,2 |
| 1206063 | Krzeszowice (3)            | 1 397,2 | 1 372,3 | 1 359,3 | 1 323,9 | 1 307,0 | 1 311,8 | 1 319,6 | 1 373,1 | 1 471,9 |
| 1206072 | Liszki (2)                 | 1 088,0 | 1 118,9 | 1 101,5 | 1 097,1 | 1 097,4 | 1 171,2 | 1 201,9 | 1 250,1 | 1 366,4 |
| 1206082 | Michałowice (2)            | 1 191,6 | 1 223,4 | 1 187,0 | 1 145,9 | 1 151,5 | 1 191,9 | 1 275,3 | 1 437,4 | 1 495,0 |
| 1206092 | Mogilany (2)               | 1 422,5 | 1 444,0 | 1 478,1 | 1 498,1 | 1 486,0 | 1 542,3 | 1 596,4 | 1 695,7 | 1 770,1 |
| 1206103 | Skała (3)                  | 1 284,7 | 1 316,4 | 1 254,5 | 1 230,6 | 1 231,8 | 1 233,2 | 1 265,8 | 1 257,3 | 1 322,5 |
| 1206113 | Skawina (3)                | 1 424,7 | 1 458,5 | 1 468,6 | 1 442,8 | 1 435,8 | 1 425,0 | 1 460,7 | 1 516,2 | 1 571,8 |
| 1206123 | Słomniki (3)               | 1 325,2 | 1 337,9 | 1 320,9 | 1 362,8 | 1 367,0 | 1 314,7 | 1 353,7 | 1 372,2 | 1 395,6 |
| 1206132 | Sułoszowa (2)              | 849,5   | 879,6   | 882,4   | 822,1   | 827,6   | 777,1   | 784,1   | 776,1   | 806,8   |
| 1206143 | Świątniki Górne (3) *      | 1 837,1 | 1 824,7 | 1 796,9 | 1 778,6 | 1 746,5 | 1 716,0 | 1 714,6 | 1 753,9 | 1 740,1 |
| 1206152 | Wielka Wieś (2)            | 1 323,2 | 1 392,3 | 1 364,1 | 1 354,2 | 1 349,5 | 1 390,2 | 1 425,8 | 1 556,9 | 1 647,5 |
| 1206162 | Zabierzów (2)              | 1 360,5 | 1 352,2 | 1 351,0 | 1 353,6 | 1 327,3 | 1 358,4 | 1 410,9 | 1 521,1 | 1 652,4 |
| 1206172 | Zielonki (2)               | 1 579,3 | 1 610,9 | 1 624,0 | 1 629,0 | 1 665,7 | 1 693,1 | 1 735,4 | 1 859,0 | 1 994,2 |
| 1208022 | Gołcza (2)                 | 913,4   | 925,1   | 909,8   | 901,9   | 945,7   | 948,3   | 982,6   | 1 028,9 | 1 062,0 |

|         |                           |         |         |         |         |         |         |         |         |         |
|---------|---------------------------|---------|---------|---------|---------|---------|---------|---------|---------|---------|
| 1209013 | Dobczyce (3)              | 1 273,8 | 1 291,4 | 1 294,5 | 1 296,0 | 1 329,3 | 1 367,7 | 1 398,0 | 1 351,3 | 1 436,5 |
| 1209022 | Lubień (2)                | 805,2   | 837,6   | 791,8   | 792,8   | 807,4   | 822,5   | 874,9   | 922,2   | 1 003,4 |
| 1209033 | Myślenice (3)             | 1 451,2 | 1 475,4 | 1 481,8 | 1 485,7 | 1 517,8 | 1 602,6 | 1 628,0 | 1 681,0 | 1 760,4 |
| 1209042 | Pcim (2)                  | 943,2   | 926,3   | 912,5   | 890,2   | 928,4   | 937,5   | 949,9   | 997,9   | 1 080,8 |
| 1209052 | Raciechowice (2)          | 881,8   | 954,8   | 953,6   | 972,0   | 993,8   | 1 033,8 | 1 082,6 | 1 010,8 | 1 086,3 |
| 1209062 | Siepraw (2)               | 1 694,5 | 1 723,3 | 1 708,5 | 1 657,0 | 1 628,7 | 1 617,2 | 1 611,6 | 1 610,6 | 1 669,8 |
| 1209073 | Sułkowice (3)             | 1 006,0 | 1 025,3 | 1 047,5 | 1 055,7 | 1 108,0 | 1 140,6 | 1 181,5 | 1 219,6 | 1 288,5 |
| 1209082 | Tokarnia (2)              | 950,9   | 959,4   | 958,4   | 948,4   | 945,8   | 951,5   | 952,7   | 984,6   | 1 024,9 |
| 1209092 | Wiśniowa (2)              | 1 239,1 | 1 260,7 | 1 200,7 | 1 252,5 | 1 318,2 | 1 368,0 | 1 412,1 | 1 322,3 | 1 410,9 |
| 1212062 | Trzyciąż (2)              | 1 021,0 | 1 122,2 | 1 121,9 | 1 099,4 | 1 076,5 | 1 032,2 | 1 046,9 | 1 102,2 | 1 140,0 |
| 1214012 | Koniusza (2)              | 656,6   | 683,4   | 668,6   | 658,8   | 669,0   | 698,8   | 744,5   | 774,9   | 843,4   |
| 1214022 | Koszyce (2)               | 691,5   | 749,6   | 756,5   | 766,3   | 796,3   | 826,9   | 859,9   | 878,1   | 856,1   |
| 1214032 | Nowe Brzesko (2) *        | 1 036,2 | 1 070,3 | 1 043,4 | 1 046,1 | 1 030,6 | 1 023,6 | 1 057,4 | 1 073,3 | 1 151,8 |
| 1214053 | Proszowice (3)            | 1 241,4 | 1 286,3 | 1 300,7 | 1 291,5 | 1 292,6 | 1 289,0 | 1 311,9 | 1 275,7 | 1 327,6 |
| 1218022 | Brzeźnica (2)             | 1 111,9 | 1 155,3 | 1 142,3 | 1 115,9 | 1 117,0 | 1 138,1 | 1 144,3 | 1 154,7 | 1 180,2 |
| 1218033 | Kalwaria Zebrzydowska (3) | 2 518,0 | 2 483,4 | 2 451,5 | 2 309,3 | 2 244,4 | 2 230,0 | 2 199,7 | 2 113,6 | 2 133,5 |
| 1218042 | Lanckorona (2)            | 1 326,0 | 1 350,9 | 1 386,8 | 1 362,1 | 1 349,7 | 1 339,0 | 1 344,5 | 1 326,4 | 1 334,7 |
| 1218072 | Stryszów (2)              | 1 237,8 | 1 250,6 | 1 228,9 | 1 223,6 | 1 245,4 | 1 254,5 | 1 264,1 | 1 293,5 | 1 308,7 |
| 1218093 | Wadowice (3)              | 1 775,7 | 1 820,6 | 1 813,9 | 1 775,7 | 1 788,7 | 1 777,2 | 1 785,3 | 1 821,2 | 1 843,0 |
| 1219012 | Biskupice (2)             | 1 060,1 | 1 076,7 | 1 091,1 | 1 073,2 | 1 059,4 | 1 081,9 | 1 168,2 | 1 117,7 | 1 163,9 |
| 1219022 | Gdów (2)                  | 1 163,0 | 1 187,1 | 1 189,4 | 1 175,5 | 1 186,4 | 1 216,9 | 1 257,2 | 1 227,8 | 1 270,2 |
| 1219032 | Kłaj (2)                  | 1 067,7 | 1 100,7 | 1 111,1 | 1 155,2 | 1 206,2 | 1 251,8 | 1 277,2 | 1 309,0 | 1 348,5 |
| 1219043 | Niepołomice (3)           | 1 253,6 | 1 302,8 | 1 318,7 | 1 320,3 | 1 319,6 | 1 335,2 | 1 385,2 | 1 450,9 | 1 550,9 |
| 1219053 | Wieliczka (3)             | 1 531,6 | 1 564,8 | 1 572,5 | 1 574,0 | 1 554,4 | 1 563,3 | 1 615,2 | 1 689,6 | 1 776,7 |
| 1261011 | Kraków (1)                | 1 987,0 | 2 040,2 | 2 068,7 | 2 075,0 | 2 080,6 | 2 080,2 | 2 120,9 | 2 224,0 | 2 341,7 |
| 1405011 | Milanówek (1)             | 2 583,5 | 2 608,9 | 2 591,3 | 2 582,6 | 2 560,1 | 2 611,8 | 2 637,7 | 2 616,1 | 2 668,1 |
| 1405021 | Podkowa Leśna (1)         | 3 312,9 | 3 311,8 | 3 283,6 | 3 241,1 | 3 297,1 | 3 382,4 | 3 432,3 | 3 490,2 | 3 606,8 |
| 1405032 | Baranów (2)               | 872,6   | 938,0   | 928,9   | 949,4   | 916,0   | 927,3   | 1 002,6 | 1 012,3 | 1 086,2 |
| 1405043 | Grodzisk Mazowiecki (3)   | 1 732,5 | 1 760,7 | 1 755,5 | 1 755,5 | 1 756,2 | 1 765,7 | 1 833,6 | 1 878,2 | 1 928,4 |
| 1405052 | Jaktorów (2)              | 1 474,3 | 1 514,1 | 1 477,7 | 1 471,2 | 1 454,3 | 1 491,3 | 1 524,0 | 1 428,6 | 1 533,1 |
| 1405062 | Żabia Wola (2)            | 1 154,4 | 1 203,5 | 1 170,8 | 1 193,9 | 1 257,7 | 1 297,1 | 1 417,0 | 1 509,4 | 1 677,1 |
| 1406032 | Chynów (2)                | 938,5   | 1 004,3 | 1 006,3 | 1 037,0 | 1 068,0 | 1 098,2 | 1 152,1 | 901,1   | 988,3   |
| 1406053 | Grójec (3)                | 1 955,7 | 2 016,8 | 2 050,1 | 2 126,8 | 2 139,6 | 2 197,3 | 2 239,1 | 2 243,5 | 2 200,0 |
| 1406092 | Pniewy (2)                | 1 022,4 | 1 090,6 | 1 049,6 | 1 144,1 | 1 257,5 | 1 293,9 | 1 300,3 | 1 160,5 | 1 241,4 |
| 1408011 | Legionowo (1)             | 1 953,0 | 2 013,0 | 2 038,6 | 2 065,3 | 2 010,4 | 2 058,3 | 2 117,9 | 2 118,7 | 2 191,3 |
| 1408022 | Jabłonna (2)              | 1 819,4 | 1 875,1 | 1 887,9 | 1 912,2 | 1 881,4 | 1 894,2 | 2 007,6 | 2 133,2 | 2 308,1 |
| 1408032 | Nieporęt (2)              | 1 721,4 | 1 809,6 | 1 904,0 | 1 980,6 | 1 976,4 | 2 036,4 | 2 308,8 | 1 876,1 | 2 125,4 |
| 1408043 | Serock (3)                | 1 416,2 | 1 484,7 | 1 488,7 | 1 504,4 | 1 527,3 | 1 591,7 | 1 641,4 | 1 473,3 | 1 579,9 |

|         |                          |         |         |         |         |         |         |         |         |         |
|---------|--------------------------|---------|---------|---------|---------|---------|---------|---------|---------|---------|
| 1408052 | Wieliszew (2) *          | 1 289,0 | 1 384,6 | 1 396,6 | 1 474,0 | 1 551,3 | 1 647,3 | 1 629,0 | 1 873,5 | 1 981,2 |
| 1412011 | Mińsk Mazowiecki (1)     | 1 774,4 | 1 728,3 | 1 614,9 | 1 622,6 | 1 627,4 | 1 678,2 | 1 710,8 | 1 666,3 | 1 691,6 |
| 1412042 | Cegłów (2)               | 986,9   | 920,3   | 876,5   | 860,2   | 805,9   | 840,8   | 855,9   | 875,7   | 925,4   |
| 1412052 | Dębe Wielkie (2)         | 1 043,4 | 1 069,9 | 1 016,6 | 1 062,8 | 1 173,0 | 1 167,7 | 1 258,7 | 1 304,3 | 1 332,0 |
| 1412062 | Dobre (2)                | 1 000,9 | 948,9   | 824,2   | 806,0   | 812,7   | 867,4   | 890,8   | 925,2   | 959,5   |
| 1412073 | Halinów (3) *            | 1 117,7 | 1 118,5 | 1 149,0 | 1 168,8 | 1 175,3 | 1 198,7 | 1 255,7 | 1 345,1 | 1 447,8 |
| 1412082 | Jakubów (2)              | 991,5   | 1 039,7 | 915,8   | 852,9   | 855,7   | 901,7   | 1 004,0 | 991,4   | 1 098,4 |
| 1412093 | Kałużyn (3)              | 1 350,5 | 1 425,5 | 1 275,6 | 1 215,5 | 1 230,6 | 1 242,6 | 1 256,6 | 1 163,7 | 1 219,9 |
| 1412102 | Latowicz (2)             | 778,6   | 726,1   | 574,5   | 565,6   | 585,7   | 601,0   | 620,8   | 605,3   | 629,9   |
| 1412112 | Mińsk Mazowiecki (2)     | 950,5   | 978,3   | 918,0   | 902,7   | 911,6   | 955,6   | 1 014,6 | 1 043,5 | 1 131,3 |
| 1412122 | Mrozy (2)                | 983,3   | 1 005,9 | 969,6   | 927,9   | 939,5   | 953,4   | 944,9   | 849,0   | 924,6   |
| 1412132 | Siennica (2)             | 844,1   | 733,5   | 667,5   | 656,6   | 666,4   | 677,1   | 707,5   | 719,4   | 742,6   |
| 1412142 | Stanisławów (2)          | 959,7   | 870,5   | 803,0   | 812,7   | 795,9   | 842,8   | 845,4   | 837,1   | 874,7   |
| 1412151 | Sulejówek (1) *          | 2 078,3 | 2 156,7 | 2 131,8 | 2 125,7 | 2 132,5 | 2 075,8 | 2 107,8 | 1 870,6 | 1 994,2 |
| 1414011 | Nowy Dwór Mazowiecki (1) | 1 583,4 | 1 627,0 | 1 643,1 | 1 648,3 | 1 623,1 | 1 636,1 | 1 674,8 | 1 402,9 | 1 450,7 |
| 1414022 | Czosnów (2)              | 1 441,6 | 1 558,3 | 1 590,7 | 1 623,2 | 1 633,3 | 1 674,8 | 1 730,0 | 1 634,5 | 1 758,2 |
| 1414032 | Leoncin (2)              | 1 049,0 | 1 121,3 | 1 144,1 | 1 176,5 | 1 153,7 | 1 171,2 | 1 215,9 | 1 064,7 | 1 106,6 |
| 1414052 | Pomiechówek (2)          | 1 201,5 | 1 279,0 | 1 316,0 | 1 356,9 | 1 340,4 | 1 369,4 | 1 431,8 | 1 216,0 | 1 321,0 |
| 1414063 | Zakroczym (3)            | 1 016,9 | 1 070,1 | 1 047,9 | 1 048,4 | 1 071,7 | 1 073,3 | 1 115,2 | 1 103,9 | 1 160,1 |
| 1417011 | Józefów (1)              | 2 422,4 | 2 475,4 | 2 395,9 | 2 431,1 | 2 475,3 | 2 497,5 | 2 556,3 | 2 575,9 | 2 834,9 |
| 1417021 | Otwock (1)               | 1 889,7 | 1 979,9 | 1 958,8 | 2 007,1 | 1 941,7 | 1 996,1 | 2 090,7 | 2 100,4 | 2 173,5 |
| 1417032 | Celestynów (2)           | 1 214,7 | 1 275,8 | 1 273,7 | 1 269,0 | 1 264,4 | 1 273,5 | 1 339,8 | 1 259,9 | 1 314,4 |
| 1417043 | Karczew (3)              | 1 513,3 | 1 581,8 | 1 591,8 | 1 596,8 | 1 537,3 | 1 569,7 | 1 657,3 | 1 529,6 | 1 635,5 |
| 1417052 | Kołbiel (2)              | 835,7   | 877,0   | 864,1   | 852,5   | 836,7   | 881,2   | 931,1   | 783,6   | 827,5   |
| 1417082 | Wiązowna (2)             | 1 605,6 | 1 665,0 | 1 681,8 | 1 730,3 | 1 731,6 | 1 784,9 | 1 842,5 | 1 737,5 | 1 952,8 |
| 1418013 | Góra Kalwaria (3)        | 1 403,7 | 1 487,8 | 1 521,6 | 1 558,8 | 1 528,4 | 1 567,0 | 1 619,3 | 1 643,1 | 1 707,6 |
| 1418023 | Konstancin-Jeziorna (3)  | 1 832,8 | 1 924,6 | 2 008,8 | 2 062,3 | 2 095,6 | 2 152,0 | 2 226,0 | 2 264,5 | 2 342,9 |
| 1418032 | Lesznowola (2)           | 1 955,4 | 2 118,6 | 2 256,4 | 2 463,9 | 2 527,8 | 2 716,2 | 3 004,2 | 3 183,4 | 3 452,7 |
| 1418043 | Piaseczno (3)            | 2 011,7 | 2 098,2 | 2 164,7 | 2 188,7 | 2 111,2 | 2 160,2 | 2 259,9 | 2 211,5 | 2 416,2 |
| 1418052 | Prażmów (2)              | 1 089,8 | 1 146,6 | 1 214,5 | 1 292,5 | 1 288,4 | 1 341,4 | 1 440,7 | 1 318,9 | 1 467,1 |
| 1418063 | Tarczyn (3) *            | -       | 1 513,6 | 1 549,8 | 1 600,5 | 1 594,6 | 1 653,2 | 1 702,4 | 1 743,5 | 1 775,2 |
| 1421011 | Piastów (1)              | 1 778,9 | 1 882,2 | 1 943,0 | 2 003,2 | 2 021,1 | 2 072,2 | 2 172,0 | 2 224,1 | 2 381,3 |
| 1421021 | Pruszków (1)             | 1 890,4 | 1 975,2 | 2 039,5 | 2 084,5 | 2 068,3 | 2 107,9 | 2 185,5 | 2 215,7 | 2 244,0 |
| 1421033 | Brwinów (3)              | 1 942,9 | 2 036,0 | 2 105,8 | 2 137,1 | 2 155,9 | 2 228,4 | 2 281,0 | 2 289,1 | 2 430,9 |
| 1421042 | Michałowice (2)          | 2 485,8 | 2 548,2 | 2 654,4 | 2 702,7 | 2 765,6 | 2 815,7 | 2 903,3 | 2 917,1 | 3 158,4 |
| 1421052 | Nadarzyn (2)             | 1 768,3 | 1 844,1 | 1 909,6 | 2 018,1 | 2 132,1 | 2 197,7 | 2 309,9 | 2 291,5 | 2 572,5 |
| 1421062 | Raszyn (2)               | 2 558,2 | 2 706,1 | 2 818,1 | 2 872,7 | 2 982,3 | 3 139,5 | 3 257,9 | 3 290,6 | 3 365,4 |
| 1428011 | Sochaczew (1)            | 1 827,7 | 1 912,5 | 1 956,9 | 2 009,9 | 1 959,4 | 1 991,9 | 2 009,9 | 1 904,4 | 1 910,1 |

|         |                       |         |         |         |         |         |         |         |         |         |
|---------|-----------------------|---------|---------|---------|---------|---------|---------|---------|---------|---------|
| 1428022 | Brochów (2) *         | 1 130,9 | 1 205,4 | 1 294,9 | 1 297,2 | 1 263,6 | 1 287,7 | 1 352,9 | 1 345,4 | 1 352,4 |
| 1428052 | Nowa Sucha (2)        | 916,2   | 983,0   | 999,4   | 1 020,3 | 1 054,5 | 1 069,9 | 1 167,1 | 1 056,7 | 1 059,3 |
| 1428072 | Sochaczew (2)         | 1 246,5 | 1 284,0 | 1 309,9 | 1 333,6 | 1 317,4 | 1 361,4 | 1 394,8 | 1 365,2 | 1 398,7 |
| 1428082 | Teresin (2)           | 1 324,5 | 1 366,5 | 1 413,8 | 1 458,1 | 1 506,9 | 1 554,1 | 1 598,5 | 1 468,1 | 1 519,5 |
| 1432013 | Błonie (3)            | 1 591,2 | 1 670,9 | 1 706,9 | 1 739,2 | 1 717,7 | 1 725,1 | 1 784,3 | 1 799,7 | 1 835,0 |
| 1432022 | Izabelin (2)          | 1 747,6 | 1 810,7 | 1 845,0 | 1 930,3 | 1 922,4 | 2 005,7 | 2 122,5 | 2 166,8 | 2 421,8 |
| 1432032 | Kampinos (2)          | 1 166,2 | 1 230,1 | 1 191,4 | 1 211,8 | 1 307,1 | 1 364,4 | 1 375,1 | 1 302,5 | 1 422,0 |
| 1432042 | Leszno (2)            | 1 394,6 | 1 440,8 | 1 441,3 | 1 478,5 | 1 546,7 | 1 601,5 | 1 666,7 | 1 477,6 | 1 505,8 |
| 1432053 | Łomianki (3)          | 2 769,7 | 2 817,0 | 2 847,1 | 2 903,8 | 2 938,7 | 2 981,0 | 3 092,5 | 2 831,7 | 3 123,0 |
| 1432063 | Ożarów Mazowiecki (3) | 1 465,8 | 1 534,2 | 1 565,8 | 1 639,9 | 1 637,0 | 1 670,4 | 1 758,6 | 1 799,3 | 1 988,6 |
| 1432072 | Stare Babice (2)      | 1 715,0 | 1 802,9 | 1 849,7 | 1 902,0 | 1 972,2 | 2 035,1 | 2 148,8 | 2 215,4 | 2 474,1 |
| 1434011 | Kobyłka (1)           | 1 934,1 | 1 965,9 | 1 985,0 | 1 996,7 | 1 979,9 | 1 983,1 | 2 036,9 | 2 034,0 | 2 153,3 |
| 1434021 | Marki (1)             | 2 030,2 | 2 047,2 | 2 096,2 | 2 111,1 | 2 022,7 | 2 004,8 | 2 052,0 | 1 683,4 | 1 849,9 |
| 1434031 | Ząbki (1)             | 2 066,3 | 2 120,3 | 2 136,1 | 2 165,0 | 2 235,6 | 2 278,5 | 2 323,2 | 2 307,4 | 2 426,3 |
| 1434041 | Zielonka (1)          | 2 082,3 | 2 183,2 | 2 277,5 | 2 330,4 | 2 272,8 | 2 322,0 | 2 350,4 | 2 346,5 | 2 475,8 |
| 1434052 | Dąbrówka (2)          | 874,8   | 950,7   | 954,4   | 966,6   | 986,0   | 1 032,3 | 1 046,3 | 1 103,6 | 1 146,6 |
| 1434072 | Klembów (2)           | 700,9   | 707,3   | 707,5   | 720,8   | 753,8   | 799,4   | 902,0   | 946,3   | 1 059,6 |
| 1434082 | Poświętne (2)         | 749,0   | 773,4   | 778,3   | 783,9   | 786,8   | 801,0   | 865,5   | 886,3   | 926,3   |
| 1434093 | Radzymin (3)          | 1 308,4 | 1 356,3 | 1 397,1 | 1 449,1 | 1 434,4 | 1 468,1 | 1 532,1 | 1 566,6 | 1 658,4 |
| 1434113 | Tłuszcz (3)           | 874,2   | 930,1   | 912,5   | 933,6   | 938,1   | 976,4   | 1 014,9 | 919,2   | 994,8   |
| 1434123 | Wołomin (3)           | 1 570,8 | 1 624,3 | 1 642,1 | 1 678,0 | 1 699,0 | 1 727,9 | 1 767,6 | 1 827,9 | 1 905,9 |
| 1435042 | Somianka (2)          | 891,2   | 957,8   | 929,0   | 967,8   | 932,5   | 932,4   | 958,8   | 869,3   | 891,1   |
| 1435053 | Wyszków (3)           | 1 726,1 | 1 719,2 | 1 699,1 | 1 720,8 | 1 661,4 | 1 683,6 | 1 707,9 | 1 517,2 | 1 585,2 |
| 1435062 | Zabrodzie (2)         | 807,5   | 797,3   | 796,1   | 841,7   | 866,5   | 917,0   | 1 002,6 | 1 017,7 | 1 031,1 |
| 1438011 | Żyrardów (1)          | 1 867,8 | 1 925,4 | 1 968,5 | 1 998,9 | 1 947,9 | 1 953,2 | 2 028,7 | 2 041,9 | 2 066,3 |
| 1438023 | Mszczonów (3)         | 1 330,7 | 1 392,9 | 1 395,1 | 1 418,1 | 1 377,0 | 1 380,2 | 1 441,7 | 1 391,8 | 1 284,8 |
| 1438032 | Puszcza Mariańska (2) | 1 313,1 | 1 337,5 | 1 345,6 | 1 395,8 | 1 340,3 | 1 379,6 | 1 438,4 | 1 198,2 | 1 307,5 |
| 1438042 | Radziejowice (2)      | 1 400,8 | 1 470,1 | 1 537,4 | 1 623,9 | 1 667,2 | 1 713,2 | 1 790,6 | 1 765,1 | 1 864,4 |
| 1438052 | Wisłucki (2)          | 1 082,6 | 1 132,7 | 1 118,0 | 1 132,4 | 1 098,9 | 1 096,6 | 1 144,8 | 1 048,3 | 1 083,5 |
| 1465011 | M.st.Warszawa (1) *   | 2 395,5 | 2 492,2 | 2 588,6 | 2 677,0 | 2 729,9 | 2 817,1 | 2 927,6 | 2 975,1 | 3 183,2 |
| 2204011 | Pruszcz Gdański (1)   | 2 031,0 | 2 114,9 | 2 055,0 | 2 054,0 | 2 062,4 | 2 029,7 | 2 048,0 | 2 080,0 | 2 110,5 |
| 2204022 | Cedry Wielkie (2)     | 1 065,0 | 1 120,6 | 1 027,0 | 1 016,9 | 1 065,4 | 999,5   | 1 010,5 | 1 047,2 | 1 019,3 |
| 2204032 | Kolbudy (2) *         | 1 364,0 | 1 399,3 | 1 382,3 | 1 422,4 | 1 482,7 | 1 496,0 | 1 571,3 | 1 642,9 | 1 861,1 |
| 2204042 | Pruszcz Gdański (2)   | 1 653,0 | 1 726,9 | 1 724,1 | 1 753,7 | 1 785,6 | 1 828,3 | 1 876,5 | 1 937,5 | 1 958,9 |
| 2204052 | Przywidz (2)          | 1 014,5 | 1 087,2 | 1 108,7 | 1 160,7 | 1 248,9 | 1 279,3 | 1 295,6 | 1 295,0 | 1 316,3 |
| 2204062 | Pszczółki (2)         | 1 425,2 | 1 441,9 | 1 391,4 | 1 403,5 | 1 376,4 | 1 416,2 | 1 428,8 | 1 480,4 | 1 560,8 |
| 2204072 | Suchy Dąb (2)         | 927,5   | 963,5   | 932,3   | 908,7   | 951,0   | 967,5   | 991,0   | 1 058,6 | 1 067,3 |
| 2204082 | Trąbki Wielkie (2)    | 869,6   | 901,6   | 876,6   | 897,1   | 954,7   | 960,9   | 1 005,4 | 1 026,8 | 1 028,6 |

|         |                        |         |         |         |         |         |         |         |         |         |
|---------|------------------------|---------|---------|---------|---------|---------|---------|---------|---------|---------|
| 2205012 | Chmielno (2)           | 993,9   | 1 113,2 | 1 126,1 | 1 146,3 | 1 163,3 | 1 189,7 | 1 270,9 | 1 292,0 | 1 329,1 |
| 2205023 | Kartuzy (3)            | 1 346,3 | 1 396,4 | 1 312,5 | 1 348,9 | 1 390,3 | 1 440,2 | 1 473,1 | 1 530,1 | 1 565,8 |
| 2205032 | Przodkowo (2)          | 989,2   | 1 042,7 | 992,8   | 1 047,0 | 1 119,6 | 1 183,3 | 1 216,8 | 1 244,2 | 1 304,0 |
| 2205042 | Sierakowice (2)        | 1 040,3 | 1 078,1 | 987,3   | 1 035,2 | 1 076,2 | 1 154,8 | 1 226,6 | 1 246,7 | 1 258,0 |
| 2205052 | Somonino (2)           | 965,7   | 1 008,9 | 939,2   | 951,9   | 1 048,7 | 1 063,4 | 1 047,9 | 1 041,0 | 1 090,3 |
| 2205062 | Stężycza (2)           | 996,4   | 1 036,8 | 989,2   | 998,1   | 1 050,7 | 1 116,9 | 1 241,5 | 1 244,2 | 1 243,3 |
| 2205072 | Sulęczyno (2)          | 910,2   | 921,2   | 845,6   | 796,0   | 839,5   | 913,1   | 960,1   | 1 038,9 | 1 052,8 |
| 2205083 | Żukowo (3)             | 1 359,2 | 1 401,5 | 1 342,5 | 1 372,1 | 1 410,9 | 1 454,8 | 1 493,4 | 1 562,8 | 1 700,9 |
| 2208011 | Lębork (1)             | 2 055,5 | 2 146,7 | 2 106,5 | 2 036,1 | 2 024,2 | 2 029,9 | 2 072,3 | 2 040,6 | 2 003,1 |
| 2208021 | Łeba (1)               | 4 901,2 | 5 080,6 | 5 248,9 | 5 475,1 | 5 597,9 | 5 804,6 | 5 826,8 | 5 760,2 | 5 583,0 |
| 2208032 | Cewice (2)             | 1 032,4 | 1 071,0 | 1 070,6 | 1 062,7 | 1 046,5 | 1 051,1 | 1 060,2 | 1 019,2 | 950,3   |
| 2208042 | Nowa Wieś Lęborska (2) | 1 265,6 | 1 320,3 | 1 209,6 | 1 158,3 | 1 156,1 | 1 169,9 | 1 194,9 | 1 242,1 | 1 281,7 |
| 2208052 | Wicko (2)              | 1 396,5 | 1 450,8 | 1 480,9 | 1 539,3 | 1 666,2 | 1 727,5 | 1 837,6 | 1 776,8 | 1 755,9 |
| 2209011 | Malbork (1)            | 1 650,9 | 1 703,0 | 1 601,4 | 1 621,0 | 1 639,1 | 1 648,0 | 1 688,6 | 1 719,7 | 1 759,9 |
| 2209032 | Lichnowy (2)           | 849,3   | 898,0   | 792,7   | 792,1   | 824,7   | 793,6   | 838,5   | 847,0   | 837,9   |
| 2209042 | Malbork (2)            | 1 107,0 | 1 176,7 | 1 057,0 | 1 075,2 | 1 122,6 | 1 160,3 | 1 232,0 | 1 228,5 | 1 309,0 |
| 2209062 | Miłoradz (2)           | 885,6   | 936,2   | 879,6   | 962,9   | 1 003,7 | 987,9   | 936,1   | 935,3   | 913,6   |
| 2209073 | Nowy Staw (3)          | 1 023,1 | 1 077,9 | 995,7   | 996,1   | 1 016,1 | 1 058,9 | 1 082,6 | 1 156,5 | 1 158,9 |
| 2209082 | Stare Pole (2)         | 911,4   | 968,7   | 865,8   | 878,1   | 843,4   | 825,3   | 893,2   | 948,3   | 958,9   |
| 2210011 | Krynica Morska (1)     | 4 582,8 | 4 705,2 | 4 679,6 | 4 768,2 | 4 806,9 | 5 142,9 | 5 377,8 | 5 363,1 | 5 350,4 |
| 2210023 | Nowy Dwór Gdański (3)  | 1 345,2 | 1 400,9 | 1 311,5 | 1 330,8 | 1 334,5 | 1 347,8 | 1 395,4 | 1 319,1 | 1 317,1 |
| 2210032 | Ostaszewo (2)          | 1 013,0 | 1 052,6 | 935,1   | 1 007,2 | 1 074,3 | 1 062,3 | 1 123,7 | 1 124,6 | 1 160,0 |
| 2210042 | Stegna (2)             | 1 339,7 | 1 404,3 | 1 366,3 | 1 439,5 | 1 505,6 | 1 568,0 | 1 625,7 | 1 656,2 | 1 681,8 |
| 2210052 | Sztutowo (2)           | 1 625,0 | 1 627,4 | 1 548,1 | 1 633,2 | 1 685,2 | 1 678,2 | 1 784,8 | 1 872,9 | 2 010,1 |
| 2211011 | Hel (1)                | 1 640,8 | 1 755,3 | 1 820,7 | 1 865,0 | 1 754,8 | 2 022,6 | 2 085,3 | 2 243,8 | 2 234,0 |
| 2211031 | Puck (1)               | 1 743,4 | 1 869,9 | 1 778,7 | 1 802,3 | 1 689,8 | 1 676,1 | 1 824,2 | 1 894,9 | 1 916,7 |
| 2211041 | Władysławowo (1)       | 4 068,9 | 4 266,5 | 3 941,7 | 3 992,9 | 2 555,8 | 2 478,4 | 3 061,7 | 3 831,7 | 3 783,5 |
| 2211052 | Kosakowo (2)           | 1 533,7 | 1 671,4 | 1 652,3 | 1 700,8 | 1 703,2 | 1 763,4 | 1 904,4 | 2 008,6 | 2 078,0 |
| 2211062 | Krokowa (2)            | 1 237,7 | 1 285,8 | 1 204,2 | 1 198,1 | 1 066,5 | 1 022,8 | 1 165,1 | 1 305,6 | 1 375,4 |
| 2211072 | Puck (2)               | 971,6   | 1 009,4 | 930,4   | 926,4   | 900,2   | 944,8   | 1 026,5 | 1 083,8 | 1 166,0 |
| 2214011 | Tczew (1)              | 1 297,3 | 1 331,5 | 1 352,9 | 1 379,6 | 1 393,9 | 1 393,9 | 1 427,3 | 1 477,4 | 1 497,9 |
| 2214023 | Gniew (3)              | 996,4   | 1 038,6 | 1 048,4 | 1 101,6 | 1 141,9 | 1 182,2 | 1 222,8 | 1 237,4 | 1 197,0 |
| 2214032 | Morzeszczyn (2)        | 701,4   | 728,4   | 673,9   | 702,7   | 776,0   | 771,8   | 785,4   | 831,6   | 886,0   |
| 2214043 | Pelplin (3)            | 1 008,9 | 1 052,0 | 1 088,5 | 1 123,3 | 1 133,6 | 1 141,2 | 1 132,8 | 1 149,7 | 1 178,7 |
| 2214052 | Subkowy (2)            | 979,0   | 1 057,9 | 1 018,8 | 1 020,6 | 1 057,5 | 1 057,0 | 1 064,0 | 1 116,0 | 1 170,5 |
| 2214062 | Tczew (2)              | 1 198,2 | 1 289,9 | 1 225,2 | 1 228,0 | 1 183,3 | 1 234,9 | 1 314,4 | 1 379,9 | 1 405,4 |
| 2215011 | Reda (1)               | 1 602,2 | 1 632,7 | 1 571,1 | 1 547,6 | 1 544,1 | 1 534,6 | 1 526,4 | 1 573,4 | 1 584,9 |
| 2215021 | Rumia (1)              | 1 420,0 | 1 489,6 | 1 469,0 | 1 501,0 | 1 539,7 | 1 546,1 | 1 580,0 | 1 643,5 | 1 680,6 |

|         |                           |         |         |         |         |         |         |         |         |         |
|---------|---------------------------|---------|---------|---------|---------|---------|---------|---------|---------|---------|
| 2215031 | Wejherowo (1)             | 1 580,4 | 1 647,7 | 1 618,8 | 1 604,5 | 1 615,7 | 1 616,9 | 1 641,2 | 1 698,0 | 1 670,1 |
| 2215042 | Choczewo (2)              | 903,6   | 971,2   | 971,4   | 1 007,0 | 1 111,4 | 1 088,0 | 1 118,0 | 1 120,2 | 1 109,9 |
| 2215052 | Gniewino (2)              | 878,8   | 945,1   | 933,0   | 960,3   | 953,2   | 932,5   | 976,2   | 977,6   | 1 021,1 |
| 2215062 | Linia (2)                 | 776,7   | 804,1   | 716,2   | 689,9   | 751,0   | 823,9   | 861,9   | 870,9   | 865,4   |
| 2215072 | Luzino (2)                | 950,4   | 974,5   | 964,0   | 983,2   | 1 023,5 | 1 063,9 | 1 109,3 | 1 169,8 | 1 217,2 |
| 2215082 | Łęczyce (2)               | 900,7   | 942,9   | 897,3   | 930,6   | 955,3   | 960,8   | 1 052,1 | 1 035,9 | 1 064,5 |
| 2215092 | Szemud (2)                | 1 183,8 | 1 235,2 | 1 241,3 | 1 258,7 | 1 279,8 | 1 325,7 | 1 386,9 | 1 420,9 | 1 494,9 |
| 2215102 | Wejherowo (2)             | 1 053,8 | 1 100,0 | 1 048,8 | 1 092,5 | 1 159,5 | 1 195,4 | 1 256,0 | 1 326,7 | 1 460,0 |
| 2261011 | Gdańsk (1)                | 1 913,8 | 1 957,1 | 1 921,5 | 1 937,8 | 1 957,1 | 1 976,3 | 2 024,9 | 2 104,5 | 2 188,9 |
| 2262011 | Gdynia (1)                | 1 787,3 | 1 862,7 | 1 837,4 | 1 884,2 | 1 920,7 | 1 973,5 | 2 037,7 | 2 163,6 | 2 224,5 |
| 2264011 | Sopot (1)                 | 2 722,2 | 2 811,9 | 2 844,6 | 2 929,8 | 2 990,1 | 3 057,0 | 3 159,3 | 3 321,3 | 3 435,4 |
| 3003011 | Gnieszno (1)              | 1 870,5 | 1 929,1 | 1 934,8 | 1 947,8 | 1 936,2 | 1 961,8 | 2 005,0 | 1 988,7 | 2 001,5 |
| 3003023 | Czarniejewo (3)           | 1 087,1 | 1 105,8 | 1 112,1 | 1 104,5 | 1 159,4 | 1 198,9 | 1 234,0 | 1 183,6 | 1 236,4 |
| 3003032 | Gnieszno (2)              | 1 046,5 | 1 112,2 | 1 156,4 | 1 157,5 | 1 174,9 | 1 199,8 | 1 233,6 | 1 296,2 | 1 420,3 |
| 3003042 | Kiszkowo (2)              | 1 009,9 | 1 053,9 | 1 022,6 | 1 016,0 | 1 068,6 | 1 116,3 | 1 183,6 | 1 121,6 | 1 194,3 |
| 3003062 | Łubowo (2)                | 935,9   | 988,5   | 1 009,7 | 1 005,7 | 1 040,4 | 1 088,9 | 1 165,9 | 1 194,6 | 1 328,6 |
| 3005012 | Granowo (2)               | 1 093,6 | 1 142,3 | 1 145,5 | 1 069,9 | 1 093,0 | 1 163,9 | 1 140,1 | 1 117,4 | 1 059,2 |
| 3005023 | Grodzisk Wielkopolski (3) | 1 579,7 | 1 617,5 | 1 605,9 | 1 598,8 | 1 614,2 | 1 635,4 | 1 625,7 | 1 556,7 | 1 613,5 |
| 3011011 | Kościan (1)               | 1 953,3 | 1 961,8 | 1 938,5 | 1 897,4 | 1 895,6 | 1 874,5 | 1 868,3 | 1 799,7 | 1 843,5 |
| 3011023 | Czempiń (3)               | 1 523,6 | 1 549,2 | 1 500,1 | 1 507,9 | 1 567,0 | 1 558,4 | 1 516,2 | 1 463,7 | 1 455,5 |
| 3011032 | Kościan (2)               | 1 146,6 | 1 133,6 | 1 086,2 | 1 105,2 | 1 116,8 | 1 134,8 | 1 169,9 | 1 164,1 | 1 176,0 |
| 3015043 | Nowy Tomyśl (3)           | 1 765,5 | 1 807,4 | 1 835,9 | 1 873,2 | 1 906,7 | 1 950,5 | 1 986,2 | 1 876,1 | 1 899,8 |
| 3015053 | Opalenica (3)             | 1 408,1 | 1 482,3 | 1 458,1 | 1 473,7 | 1 514,0 | 1 570,6 | 1 592,9 | 1 517,2 | 1 584,6 |
| 3016013 | Oborniki (3)              | 1 835,9 | 1 878,0 | 1 873,4 | 1 854,8 | 1 862,8 | 1 876,8 | 1 890,0 | 1 808,1 | 1 821,7 |
| 3016023 | Rogoźno (3)               | 1 393,9 | 1 376,5 | 1 349,2 | 1 422,0 | 1 355,7 | 1 350,9 | 1 389,0 | 1 338,6 | 1 350,6 |
| 3021011 | Luboń (1)                 | 1 936,9 | 1 950,3 | 1 937,3 | 1 958,5 | 1 999,0 | 2 022,3 | 2 080,3 | 2 124,1 | 2 221,0 |
| 3021021 | Puszczykowo (1)           | 2 426,3 | 2 538,7 | 2 528,3 | 2 538,8 | 2 588,2 | 2 670,6 | 2 771,1 | 2 794,3 | 2 895,0 |
| 3021033 | Buk (3)                   | 1 699,2 | 1 739,1 | 1 744,3 | 1 804,2 | 1 885,7 | 1 932,4 | 1 969,4 | 1 995,9 | 2 055,7 |
| 3021042 | Czerwonak (2)             | 1 567,3 | 1 600,6 | 1 597,0 | 1 590,7 | 1 589,9 | 1 611,8 | 1 647,8 | 1 667,6 | 1 744,6 |
| 3021052 | Dopiewo (2)               | 1 446,9 | 1 506,3 | 1 514,6 | 1 584,2 | 1 708,7 | 1 802,1 | 1 920,1 | 2 027,2 | 2 153,2 |
| 3021062 | Kleszczewo (2)            | 1 016,3 | 1 074,4 | 1 064,9 | 1 077,4 | 1 171,0 | 1 153,6 | 1 217,4 | 1 370,9 | 1 544,1 |
| 3021072 | Komorniki (2)             | 1 873,0 | 1 909,3 | 1 877,5 | 1 826,9 | 1 902,0 | 1 952,2 | 2 080,9 | 2 184,4 | 2 382,4 |
| 3021083 | Kostrzyn (3)              | 1 408,4 | 1 447,6 | 1 434,1 | 1 446,7 | 1 502,1 | 1 516,3 | 1 566,6 | 1 543,6 | 1 573,1 |
| 3021093 | Kórnik (3)                | 1 721,4 | 1 745,3 | 1 695,6 | 1 736,6 | 1 850,9 | 1 943,1 | 2 055,3 | 2 088,7 | 2 222,6 |
| 3021103 | Mosina (3)                | 1 776,8 | 1 830,0 | 1 801,3 | 1 830,3 | 1 854,5 | 1 914,4 | 1 948,2 | 1 953,6 | 1 959,7 |
| 3021113 | Murowana Goślina (3)      | 1 800,1 | 1 833,2 | 1 821,3 | 1 839,9 | 1 900,8 | 1 957,6 | 2 010,0 | 1 972,4 | 2 029,5 |
| 3021123 | Pobiedziska (3)           | 1 630,1 | 1 684,1 | 1 681,9 | 1 676,1 | 1 720,6 | 1 737,5 | 1 783,3 | 1 820,9 | 1 904,1 |
| 3021132 | Rokietnica (2)            | 1 677,2 | 1 716,6 | 1 714,3 | 1 751,1 | 1 778,2 | 1 792,9 | 1 865,6 | 1 947,8 | 2 090,1 |

|         |                        |         |         |         |         |         |         |         |         |         |
|---------|------------------------|---------|---------|---------|---------|---------|---------|---------|---------|---------|
| 3021143 | Stęszew (3)            | 1 352,9 | 1 414,7 | 1 394,5 | 1 387,0 | 1 468,4 | 1 518,6 | 1 574,7 | 1 612,9 | 1 707,9 |
| 3021152 | Suchy Las (2)          | 2 270,4 | 2 349,9 | 2 394,4 | 2 430,9 | 2 452,9 | 2 556,7 | 2 634,3 | 2 720,7 | 3 003,5 |
| 3021163 | Swarzędz (3)           | 2 139,4 | 2 187,2 | 2 131,8 | 2 100,8 | 2 110,7 | 2 135,5 | 2 171,7 | 2 209,3 | 2 252,8 |
| 3021172 | Tarnowo Podgórne (2)   | 2 413,5 | 2 464,6 | 2 448,2 | 2 425,9 | 2 500,4 | 2 568,9 | 2 630,1 | 2 746,1 | 2 945,9 |
| 3024022 | Duszniki (2)           | 1 040,1 | 1 074,7 | 1 047,8 | 1 077,9 | 1 087,7 | 1 128,8 | 984,2   | 1 029,9 | 1 136,1 |
| 3024032 | Kaźmierz (2)           | 1 182,8 | 1 210,0 | 1 243,1 | 1 241,1 | 1 320,5 | 1 290,8 | 1 380,2 | 1 317,1 | 1 376,4 |
| 3024073 | Szamotuły (3)          | 1 884,1 | 1 930,9 | 1 913,1 | 1 912,7 | 1 915,1 | 1 693,3 | 1 744,7 | 1 646,1 | 1 712,5 |
| 3025012 | Dominowo (2)           | 924,1   | 926,6   | 920,8   | 925,2   | 1 010,9 | 1 003,7 | 1 115,2 | 801,2   | 879,1   |
| 3025043 | Środa Wielkopolska (3) | 1 658,6 | 1 690,4 | 1 653,4 | 1 654,5 | 1 671,1 | 1 705,9 | 1 728,9 | 1 501,0 | 1 551,5 |
| 3025052 | Zaniemyśl (2)          | 1 444,0 | 1 496,7 | 1 467,2 | 1 444,3 | 1 479,8 | 1 489,2 | 1 483,7 | 1 135,6 | 1 181,3 |
| 3026012 | Brodnica (2)           | 1 060,8 | 1 060,0 | 993,5   | 959,1   | 1 005,4 | 1 020,4 | 1 208,9 | 1 174,6 | 1 124,4 |
| 3026043 | Śrem (3)               | 1 686,8 | 1 690,0 | 1 620,9 | 1 564,1 | 1 581,1 | 1 618,3 | 1 650,2 | 1 638,4 | 1 673,8 |
| 3028011 | Wągrowiec (1)          | 1 872,6 | 1 835,9 | 1 794,2 | 1 809,6 | 1 794,8 | 1 801,9 | 1 848,3 | 1 811,2 | 1 837,9 |
| 3028053 | Skoki (3)              | 1 378,7 | 1 384,0 | 1 310,1 | 1 288,8 | 1 324,0 | 1 341,1 | 1 415,3 | 1 115,0 | 1 192,1 |
| 3028072 | Wągrowiec (2)          | 1 015,4 | 1 045,4 | 984,2   | 982,6   | 959,8   | 988,6   | 863,9   | 855,8   | 882,9   |
| 3030033 | Nekla (3) *            | 1 465,9 | 1 532,9 | 1 540,6 | 1 596,6 | 1 590,0 | 1 617,3 | 1 649,0 | 1 442,9 | 1 501,9 |
| 3030053 | Września (3)           | 1 892,4 | 1 947,2 | 1 926,8 | 1 929,4 | 1 860,9 | 1 854,6 | 1 886,4 | 1 783,3 | 1 854,8 |
| 3064011 | Poznań (1)             | 2 189,1 | 2 273,3 | 2 294,6 | 2 368,3 | 2 362,3 | 2 438,4 | 2 515,8 | 2 592,6 | 2 690,6 |

Source: data from Poland's Central Statistical Office (GUS)
