# Supplementary material
Source: MDPI journal article supplement (https://www.mdpi.com/2071-1050/10/3/837)
Supplement: s1 [file s1]

| KOD GUS | Municipality         | Voivodeship  | Powiat      | Share of farms with an area less than 5 ha in the overall number of farms | Share of farms with an area less than 5 ha in the overall number of farms | Share of farms with an area less than 5 ha in the overall number of farms [1996] | Share of economically strong farms [2010] | Share of surface area of municipalities covered by spatial development plans in 2009 [%] | Share of surface area of municipalities covered by spatial development plans in 2010 [%] |
|---------|----------------------|--------------|-------------|---------------------------------------------------------------------------|---------------------------------------------------------------------------|----------------------------------------------------------------------------------|-------------------------------------------|------------------------------------------------------------------------------------------|------------------------------------------------------------------------------------------|
| 0214011 | Oleśnica (1)         | Dolnośląskie | oleśnicki   | 64,1%                                                                     | 77,1%                                                                     | 73,7%                                                                            | 12,1%                                     | 31,0                                                                                     | 37,9                                                                                     |
| 0214032 | Dobroszyce (2)       | Dolnośląskie | oleśnicki   | 54,5%                                                                     | 56,8%                                                                     | 49,3%                                                                            | 12,2%                                     | 5,4                                                                                      | 5,6                                                                                      |
| 0214062 | Oleśnica (2)         | Dolnośląskie | oleśnicki   | 42,0%                                                                     | 50,5%                                                                     | 38,3%                                                                            | 17,9%                                     | 25,5                                                                                     | 25,5                                                                                     |
| 0215011 | Oława (1)            | Dolnośląskie | oławski     | 63,4%                                                                     | 75,9%                                                                     | 64,5%                                                                            | 14,9%                                     | 30,1                                                                                     | 32,0                                                                                     |
| 0215022 | Domaniów (2)         | Dolnośląskie | oławski     | 30,0%                                                                     | 35,6%                                                                     | 31,9%                                                                            | 20,9%                                     | 0,7                                                                                      | 1,3                                                                                      |
| 0215033 | Jelcz-Laskowice (3)  | Dolnośląskie | oławski     | 70,9%                                                                     | 70,1%                                                                     | 64,9%                                                                            | 4,9%                                      | 2,7                                                                                      | 5,0                                                                                      |
| 0215042 | Oława (2)            | Dolnośląskie | oławski     | 56,9%                                                                     | 59,7%                                                                     | 49,9%                                                                            | 8,6%                                      | 5,1                                                                                      | 12,6                                                                                     |
| 0217012 | Borów (2)            | Dolnośląskie | strzeliński | 28,5%                                                                     | 32,1%                                                                     | 31,3%                                                                            | 16,0%                                     | 27,4                                                                                     | 27,4                                                                                     |
| 0218012 | Kostomłoty (2)       | Dolnośląskie | średzki     | 38,6%                                                                     | 38,1%                                                                     | 32,2%                                                                            | 12,1%                                     | 9,0                                                                                      | 9,0                                                                                      |
| 0218032 | Miękinia (2)         | Dolnośląskie | średzki     | 64,3%                                                                     | 68,1%                                                                     | 59,4%                                                                            | 9,5%                                      | 9,2                                                                                      | 20,6                                                                                     |
| 0218043 | Środa Śląska (3)     | Dolnośląskie | średzki     | 49,0%                                                                     | 57,1%                                                                     | 51,4%                                                                            | 12,1%                                     | 56,1                                                                                     | 59,6                                                                                     |
| 0220013 | Oborniki Śląskie (3) | Dolnośląskie | trzebnicki  | 70,0%                                                                     | 74,9%                                                                     | 68,2%                                                                            | 8,5%                                      | 100,0                                                                                    | 100,0                                                                                    |
| 0220023 | Prusice (3) *        | Dolnośląskie | trzebnicki  | 47,1%                                                                     | 48,3%                                                                     | 39,3%                                                                            | 13,2%                                     | 5,7                                                                                      | 5,7                                                                                      |
| 0220033 | Trzebnica (3)        | Dolnośląskie | trzebnicki  | 57,0%                                                                     | 56,5%                                                                     | 47,7%                                                                            | 12,2%                                     | 14,7                                                                                     | 14,7                                                                                     |
| 0220042 | Wisznia Mała (2)     | Dolnośląskie | trzebnicki  | 64,1%                                                                     | 62,4%                                                                     | 60,4%                                                                            | 14,5%                                     | 4,9                                                                                      | 36,2                                                                                     |
| 0220052 | Zawonia (2)          | Dolnośląskie | trzebnicki  | 57,5%                                                                     | 61,1%                                                                     | 47,7%                                                                            | 8,8%                                      | 51,8                                                                                     | 51,8                                                                                     |
| 0222013 | Brzeg Dolny (3)      | Dolnośląskie | wołowski    | 67,4%                                                                     | 71,3%                                                                     | 63,6%                                                                            | 10,7%                                     | 99,8                                                                                     | 99,8                                                                                     |
| 0223012 | Czernica (2)         | Dolnośląskie | wrocławski  | 64,6%                                                                     | 73,7%                                                                     | 67,5%                                                                            | 8,2%                                      | 39,3                                                                                     | 55,6                                                                                     |
| 0223022 | Długołęka (2)        | Dolnośląskie | wrocławski  | 51,4%                                                                     | 54,7%                                                                     | 43,6%                                                                            | 12,6%                                     | 97,5                                                                                     | 97,5                                                                                     |
| 0223032 | Jordanów Śląski (2)  | Dolnośląskie | wrocławski  | 33,9%                                                                     | 30,6%                                                                     | 28,6%                                                                            | 19,0%                                     | 17,9                                                                                     | 17,9                                                                                     |
| 0223043 | Kąty Wrocławskie (3) | Dolnośląskie | wrocławski  | 52,3%                                                                     | 53,1%                                                                     | 46,7%                                                                            | 13,4%                                     | 100,0                                                                                    | 100,0                                                                                    |
| 0223052 | Kobierzyce (2)       | Dolnośląskie | wrocławski  | 44,9%                                                                     | 48,1%                                                                     | 44,1%                                                                            | 20,4%                                     | 99,5                                                                                     | 99,5                                                                                     |
| 0223062 | Mietków (2)          | Dolnośląskie | wrocławski  | 39,0%                                                                     | 42,9%                                                                     | 37,8%                                                                            | 12,1%                                     | 99,8                                                                                     | 99,8                                                                                     |
| 0223073 | Sobótka (3)          | Dolnośląskie | wrocławski  | 39,1%                                                                     | 48,0%                                                                     | 44,0%                                                                            | 13,0%                                     | 76,4                                                                                     | 76,7                                                                                     |
| 0223083 | Siechnice (3) *      | Dolnośląskie | wrocławski  | 69,2%                                                                     | 72,0%                                                                     | 67,1%                                                                            | 7,5%                                      | 88,8                                                                                     | 88,8                                                                                     |
| 0223092 | Żórawina (2)         | Dolnośląskie | wrocławski  | 46,6%                                                                     | 50,0%                                                                     | 46,1%                                                                            | 11,9%                                     | 10,1                                                                                     | 10,2                                                                                     |
| 0264011 | Wrocław (1)          | Dolnośląskie | Wrocław     | 72,6%                                                                     | 87,0%                                                                     | 82,6%                                                                            | 9,4%                                      | 41,0                                                                                     | 44,8                                                                                     |
| 0608011 | Lubartów (1)         | lubelskie    | lubartowski | 86,2%                                                                     | 95,1%                                                                     | 90,3%                                                                            | 1,6%                                      | 100,1                                                                                    | 100,1                                                                                    |
| 0608072 | Lubartów (2)         | lubelskie    | lubartowski | 77,3%                                                                     | 78,8%                                                                     | 71,9%                                                                            | 3,6%                                      | 100,1                                                                                    | 100,2                                                                                    |
| 0609013 | Bełżyce (3)          | lubelskie    | lubelski    | 59,2%                                                                     | 61,5%                                                                     | 64,9%                                                                            | 9,4%                                      | 78,9                                                                                     | 78,9                                                                                     |

|         |                    |             |           |       |       |       |       |       |       |
|---------|--------------------|-------------|-----------|-------|-------|-------|-------|-------|-------|
| 0609033 | Bychawa (3)        | lubelskie   | lubelski  | 45,1% | 43,5% | 47,6% | 11,3% | 100,0 | 9,5   |
| 0609042 | Garbów (2)         | lubelskie   | lubelski  | 59,8% | 57,6% | 56,9% | 11,2% | 99,8  | 99,8  |
| 0609052 | Głusk (2)          | lubelskie   | lubelski  | 68,3% | 76,5% | 67,1% | 6,6%  | 96,5  | 6,3   |
| 0609062 | Jabłonna (2)       | lubelskie   | lubelski  | 83,5% | 84,7% | 84,5% | 6,2%  | 99,8  | 99,8  |
| 0609072 | Jastków (2)        | lubelskie   | lubelski  | 68,9% | 70,3% | 63,3% | 9,1%  | 94,9  | 95,0  |
| 0609082 | Konopnica (2)      | lubelskie   | lubelski  | 73,1% | 78,5% | 72,6% | 7,7%  | 23,9  | 23,9  |
| 0609102 | Niedzwica Duża (2) | lubelskie   | lubelski  | 58,4% | 61,8% | 66,7% | 13,2% | 95,2  | 95,2  |
| 0609112 | Niemce (2)         | lubelskie   | lubelski  | 72,9% | 73,7% | 65,9% | 5,4%  | 99,9  | 99,9  |
| 0609122 | Strzyżewice (2)    | lubelskie   | lubelski  | 63,0% | 66,5% | 64,4% | 6,3%  | 100,0 | 100,0 |
| 0609132 | Wojciechów (2)     | lubelskie   | lubelski  | 62,4% | 60,6% | 66,0% | 9,3%  |       |       |
| 0609142 | Wólka (2)          | lubelskie   | lubelski  | 77,2% | 80,1% | 75,5% | 3,3%  | 99,9  | 99,9  |
| 0610033 | Łączna (3)         | lubelskie   | łęczyński | 65,0% | 60,6% | 62,2% | 7,4%  | 100,0 | 100,0 |
| 0610062 | Spiczyn (2)        | lubelskie   | łęczyński | 66,1% | 64,3% | 59,1% | 11,8% | 99,4  | 99,4  |
| 0614083 | Nałęczów (3)       | lubelskie   | puławski  | 73,7% | 76,3% | 74,2% | 7,6%  | 2,1   | 2,1   |
| 0617011 | Świdnik (1)        | lubelskie   | świdnicki | 75,8% | 85,8% | 88,9% | 4,8%  | 100,0 | 100,0 |
| 0617022 | Melgiew (2)        | lubelskie   | świdnicki | 63,1% | 70,4% | 69,6% | 8,9%  | 2,5   | 2,5   |
| 0617033 | Piaski (3)         | lubelskie   | świdnicki | 53,0% | 57,5% | 51,8% | 9,9%  | 99,9  | 99,9  |
| 0663011 | Lublin (1)         | lubelskie   | Lublin    | 78,5% | 89,0% | 87,4% | 4,3%  | 44,0  | 44,0  |
| 1201011 | Bochnia (1)        | małopolskie | bocheński | 90,8% | 93,2% | 93,5% | 1,6%  | 30,0  | 45,0  |
| 1201022 | Bochnia (2)        | małopolskie | bocheński | 88,0% | 90,2% | 90,4% | 1,3%  | 99,8  | 99,8  |
| 1201032 | Drwinia (2)        | małopolskie | bocheński | 82,4% | 83,8% | 83,6% | 1,3%  | 100,3 | 100,3 |
| 1201052 | Łapanów (2)        | małopolskie | bocheński | 82,8% | 81,6% | 82,4% | 3,2%  | 99,0  | 99,0  |
| 1201063 | Nowy Wiśnicz (3)   | małopolskie | bocheński | 93,0% | 93,1% | 91,5% | 1,1%  | 100,4 | 100,4 |
| 1201072 | Rzezawa (2)        | małopolskie | bocheński | 92,3% | 93,5% | 92,7% | 1,5%  | 87,7  | 87,7  |
| 1201082 | Trzciana (2)       | małopolskie | bocheński | 85,6% | 86,9% | 88,8% | 7,5%  | 100,0 | 100,0 |
| 1201092 | Żegocina (2)       | małopolskie | bocheński | 94,8% | 92,4% | 95,1% | 1,1%  | 89,4  | 89,4  |
| 1206012 | Czernichów (2)     | małopolskie | krakowski | 88,3% | 92,1% | 93,2% | 4,3%  | 0,7   | 0,7   |
| 1206022 | Igołomia-Wawrzeńcz | małopolskie | krakowski | 76,8% | 79,0% | 79,2% | 37,3% | 99,7  | 99,7  |
| 1206032 | Iwanowice (2)      | małopolskie | krakowski | 82,5% | 85,9% | 85,7% | 3,0%  | 99,3  | 99,3  |
| 1206042 | Jerzmanowice-Przeg | małopolskie | krakowski | 95,7% | 96,5% | 94,7% | 0,8%  | 100,4 | 100,4 |
| 1206052 | Kocmyrzów-Luborzyd | małopolskie | krakowski | 75,6% | 77,6% | 77,3% | 8,8%  | 102,1 | 102,1 |
| 1206063 | Krzeszowice (3)    | małopolskie | krakowski | 94,1% | 96,4% | 96,1% | 1,7%  | 88,2  | 88,2  |
| 1206072 | Liszki (2)         | małopolskie | krakowski | 95,9% | 96,2% | 97,0% | 1,5%  | 99,9  | 54,3  |
| 1206082 | Michałowice (2)    | małopolskie | krakowski | 61,2% | 75,1% | 78,9% | 4,8%  | 100,0 | 100,0 |
| 1206092 | Mogilany (2)       | małopolskie | krakowski | 91,0% | 92,6% | 94,1% | 3,9%  | 99,8  | 99,8  |
| 1206103 | Skala (3)          | małopolskie | krakowski | 85,2% | 89,1% | 86,8% | 1,6%  | 86,2  | 86,2  |
| 1206113 | Skawina (3)        | małopolskie | krakowski | 93,1% | 95,6% | 95,6% | 1,9%  | 97,8  | 97,8  |

|         |                       |             |             |       |       |       |       |       |       |
|---------|-----------------------|-------------|-------------|-------|-------|-------|-------|-------|-------|
| 1206123 | Słomniki (3)          | małopolskie | krakowski   | 65,3% | 67,1% | 67,8% | 10,0% | 97,7  | 97,7  |
| 1206132 | Sułoszowa (2)         | małopolskie | krakowski   | 73,7% | 77,9% | 80,0% | 5,9%  | 96,4  | 96,4  |
| 1206143 | Świątniki Górne (3) * | małopolskie | krakowski   | 90,1% | 95,0% | 97,0% | 1,5%  | 100,0 | 100,0 |
| 1206152 | Wielka Wieś (2)       | małopolskie | krakowski   | 94,4% | 95,3% | 95,8% | 2,5%  | 97,2  | 97,2  |
| 1206162 | Zabierzów (2)         | małopolskie | krakowski   | 88,0% | 93,0% | 96,0% | 4,4%  | 73,0  | 73,0  |
| 1206172 | Zielonki (2)          | małopolskie | krakowski   | 91,9% | 93,6% | 93,5% | 2,6%  | 95,3  | 95,3  |
| 1208022 | Gołcza (2)            | małopolskie | miechowski  | 61,6% | 63,1% | 65,0% | 13,9% | 100,3 | 100,3 |
| 1209013 | Dobczyce (3)          | małopolskie | myślenicki  | 94,1% | 93,8% | 93,1% | 2,4%  | 100,0 | 100,0 |
| 1209022 | Lubień (2)            | małopolskie | myślenicki  | 95,2% | 93,7% | 93,1% | 0,1%  | 0,1   | 0,1   |
| 1209033 | Myślenice (3)         | małopolskie | myślenicki  | 96,6% | 97,3% | 97,1% | 0,7%  | 74,0  | 74,0  |
| 1209042 | Pcim (2)              | małopolskie | myślenicki  | 97,2% | 96,7% | 96,4% | 0,0%  | 100,0 | 99,6  |
| 1209052 | Raciechowice (2)      | małopolskie | myślenicki  | 83,9% | 82,9% | 84,7% | 3,9%  |       |       |
| 1209062 | Siepraw (2)           | małopolskie | myślenicki  | 96,8% | 97,5% | 98,6% | 1,0%  | 100,2 | 100,2 |
| 1209073 | Sułkowice (3)         | małopolskie | myślenicki  | 99,0% | 98,7% | 98,8% | 0,2%  | 100,2 | 100,2 |
| 1209082 | Tokarnia (2)          | małopolskie | myślenicki  | 95,7% | 92,3% | 92,9% | 0,0%  | 100,3 | 100,3 |
| 1209092 | Wiśniowa (2)          | małopolskie | myślenicki  | 85,5% | 83,9% | 86,6% | 0,3%  | 99,9  | 100,0 |
| 1212062 | Trzyciąż (2)          | małopolskie | olkuski     | 64,1% | 65,5% | 64,3% | 5,6%  | 100,9 | 100,9 |
| 1214012 | Koniusza (2)          | małopolskie | proszowicki | 63,9% | 63,0% | 65,1% | 27,6% | 100,0 | 0,0   |
| 1214022 | Koszyce (2)           | małopolskie | proszowicki | 64,2% | 67,2% | 73,1% | 7,5%  | 4,2   | 4,2   |
| 1214032 | Nowe Brzesko (2) *    | małopolskie | proszowicki | 64,5% | 67,2% | 74,5% | 19,7% | -     | -     |
| 1214053 | Proszowice (3)        | małopolskie | proszowicki | 68,1% | 68,9% | 71,0% | 17,1% |       |       |
| 1218022 | Brzeźnica (2)         | małopolskie | wadowicki   | 92,5% | 93,4% | 93,4% | 1,4%  | 99,8  | 98,6  |
| 1218033 | Kalwaria Zebrzydowska | małopolskie | wadowicki   | 95,4% | 96,5% | 96,7% | 0,6%  | 100,1 | 100,1 |
| 1218042 | Lanckorona (2)        | małopolskie | wadowicki   | 96,5% | 96,0% | 95,4% | 0,3%  | 94,9  | 94,9  |
| 1218072 | Stryków (2)           | małopolskie | wadowicki   | 96,4% | 96,6% | 96,7% | 0,7%  | 100,3 | 100,3 |
| 1218093 | Wadowice (3)          | małopolskie | wadowicki   | 96,0% | 96,0% | 95,9% | 0,7%  | 99,7  | 99,7  |
| 1219012 | Biskupice (2)         | małopolskie | wielicki    | 94,8% | 96,3% | 96,2% | 0,6%  | 99,7  | 99,7  |
| 1219022 | Gdów (2)              | małopolskie | wielicki    | 81,2% | 85,8% | 85,7% | 4,6%  | 90,9  | 90,9  |
| 1219032 | Kłaj (2)              | małopolskie | wielicki    | 88,7% | 95,2% | 95,9% | 2,0%  | 100,0 | 100,0 |
| 1219043 | Niepołomice (3)       | małopolskie | wielicki    | 89,9% | 93,1% | 92,6% | 1,2%  | 55,1  | 55,3  |
| 1219053 | Wieliczka (3)         | małopolskie | wielicki    | 93,7% | 96,9% | 96,9% | 1,5%  | 21,8  | 21,8  |
| 1261011 | Kraków (1)            | małopolskie | Kraków      | 89,3% | 94,0% | 94,3% | 4,5%  | 16,7  | 29,2  |
| 1405011 | Milanówek (1)         | Mazowieckie | grodziski   | 0,0%  | 86,8% | 89,0% | 33,3% | 33,1  | 33,1  |
| 1405021 | Podkowa Leśna (1)     | Mazowieckie | grodziski   | 0,0%  | 71,4% | 75,0% | 55,6% | 99,7  | 99,7  |
| 1405032 | Baranów (2)           | Mazowieckie | grodziski   | 51,9% | 54,6% | 50,8% | 17,1% | 4,5   | 4,5   |
| 1405043 | Grodzisk Mazowiecki   | Mazowieckie | grodziski   | 56,7% | 75,5% | 73,7% | 13,8% | 24,8  | 38,3  |
| 1405052 | Jaktorów (2)          | Mazowieckie | grodziski   | 81,7% | 85,5% | 83,1% | 3,1%  | 39,8  | 39,8  |

|         |                      |             |              |       |        |       |       |       |       |
|---------|----------------------|-------------|--------------|-------|--------|-------|-------|-------|-------|
| 1405062 | Żabia Wola (2)       | Mazowieckie | grodziski    | 68,3% | 75,0%  | 60,7% | 5,3%  | 100,2 | 100,2 |
| 1406032 | Chynów (2)           | Mazowieckie | grójecki     | 47,9% | 51,4%  | 47,1% | 22,3% | 25,0  | 33,1  |
| 1406053 | Grójec (3)           | Mazowieckie | grójecki     | 56,8% | 66,8%  | 64,3% | 20,2% | 4,5   | 4,5   |
| 1406092 | Pniewy (2)           | Mazowieckie | grójecki     | 51,3% | 55,1%  | 44,2% | 26,5% | 100,0 | 100,0 |
| 1408011 | Legionowo (1)        | Mazowieckie | legionowski  | 72,4% | 100,0% |       | 6,3%  | 100,4 | 100,4 |
| 1408022 | Jabłonna (2)         | Mazowieckie | legionowski  | 59,7% | 62,8%  | 50,5% | 43,4% | 25,7  | 25,7  |
| 1408032 | Nieporęt (2)         | Mazowieckie | legionowski  | 68,3% | 80,5%  | 76,5% | 13,3% | 96,8  | 96,8  |
| 1408043 | Serock (3)           | Mazowieckie | legionowski  | 54,4% | 57,2%  | 55,5% | 11,1% | 88,9  | 88,9  |
| 1408052 | Wieliszew (2) *      | Mazowieckie | legionowski  | 55,9% | 68,4%  | 66,2% | 5,5%  | 15,6  | 16,8  |
| 1412011 | Mińsk Mazowiecki (1) | Mazowieckie | miński       | 83,2% | 91,7%  | 87,4% | 1,4%  | 100,0 | 100,0 |
| 1412042 | Cegłów (2)           | Mazowieckie | miński       | 67,6% | 66,6%  | 56,3% | 8,0%  | 4,5   | 4,5   |
| 1412052 | Dębe Wielkie (2)     | Mazowieckie | miński       | 74,7% | 78,2%  | 71,7% | 4,1%  | 9,5   | 9,5   |
| 1412062 | Dobre (2)            | Mazowieckie | miński       | 50,3% | 47,9%  | 41,1% | 6,4%  | 10,6  | 10,6  |
| 1412073 | Halinów (3) *        | Mazowieckie | miński       | 82,0% | 87,5%  | 83,8% | 7,1%  | 97,3  | 97,3  |
| 1412082 | Jakubów (2)          | Mazowieckie | miński       | 55,6% | 49,4%  | 39,3% | 6,8%  | 10,1  | 10,1  |
| 1412093 | Kałużyn (3)          | Mazowieckie | miński       | 51,4% | 55,0%  | 42,7% | 9,1%  | 13,5  | 13,5  |
| 1412102 | Latowicz (2)         | Mazowieckie | miński       | 33,2% | 35,3%  | 29,1% | 26,0% | 0,4   | 0,0   |
| 1412112 | Mińsk Mazowiecki (2) | Mazowieckie | miński       | 78,1% | 81,5%  | 76,0% | 4,2%  | 100,0 | 100,0 |
| 1412122 | Mrozy (2)            | Mazowieckie | miński       | 61,3% | 62,1%  | 53,2% | 7,5%  | 100,0 | 100,0 |
| 1412132 | Siennica (2)         | Mazowieckie | miński       | 50,6% | 49,5%  | 41,0% | 13,9% | 99,9  | 99,9  |
| 1412142 | Stanisławów (2)      | Mazowieckie | miński       | 64,9% | 62,9%  | 50,4% | 3,2%  | 0,4   | 0,4   |
| 1412151 | Sulejówek (1) *      | Mazowieckie | miński       | 93,7% | 94,8%  | 93,4% | 9,1%  | 57,2  | 57,2  |
| 1414011 | Nowy Dwór Mazowiecki | Mazowieckie | nowodworski  | 64,3% | 86,7%  | 73,8% | 15,9% | 86,5  | 86,5  |
| 1414022 | Czosnów (2)          | Mazowieckie | nowodworski  | 72,7% | 75,0%  | 69,1% | 3,8%  | 100,0 | 100,0 |
| 1414032 | Leoncin (2)          | Mazowieckie | nowodworski  | 68,9% | 70,1%  | 58,4% | 3,7%  | 14,1  | 16,9  |
| 1414052 | Pomieczówek (2)      | Mazowieckie | nowodworski  | 37,4% | 45,1%  | 41,8% | 15,3% | 33,9  | 33,9  |
| 1414063 | Zakroczym (3)        | Mazowieckie | nowodworski  | 56,5% | 59,5%  | 55,4% | 24,1% | 44,6  | 44,6  |
| 1417011 | Józefów (1)          | Mazowieckie | otwocki      | 84,4% | 93,3%  | 93,5% | 3,2%  | 29,1  | 29,1  |
| 1417021 | Otwock (1)           | Mazowieckie | otwocki      | 91,7% | 97,6%  | 97,0% | 0,5%  | 32,4  | 34,0  |
| 1417032 | Celestynów (2)       | Mazowieckie | otwocki      | 80,9% | 82,4%  | 82,5% | 4,3%  |       |       |
| 1417043 | Karczew (3)          | Mazowieckie | otwocki      | 77,5% | 82,2%  | 78,7% | 11,8% | 0,1   | 0,1   |
| 1417052 | Kołbiel (2)          | Mazowieckie | otwocki      | 59,2% | 59,6%  | 44,1% | 4,3%  | 99,9  | 99,9  |
| 1417082 | Wiązowna (2)         | Mazowieckie | otwocki      | 71,5% | 80,5%  | 71,5% | 6,0%  | 1,7   | 1,7   |
| 1418013 | Góra Kalwaria (3)    | Mazowieckie | piaseczyński | 69,0% | 74,7%  | 74,2% | 13,0% | 13,8  | 15,9  |
| 1418023 | Konstancin-Jeziorna  | Mazowieckie | piaseczyński | 72,4% | 79,3%  | 78,9% | 6,2%  | 61,3  | 62,9  |
| 1418032 | Lesznowola (2)       | Mazowieckie | piaseczyński | 67,9% | 71,1%  | 67,3% | 7,5%  | 95,3  | 95,3  |
| 1418043 | Piaseczno (3)        | Mazowieckie | piaseczyński | 69,7% | 79,6%  | 79,6% | 8,2%  | 41,0  | 43,1  |

|         |                       |             |                     |       |       |       |       |       |       |
|---------|-----------------------|-------------|---------------------|-------|-------|-------|-------|-------|-------|
| 1418052 | Prażmów (2)           | Mazowieckie | piaseczyński        | 69,7% | 71,0% | 60,6% | 8,1%  | 99,6  | 100,0 |
| 1418063 | Tarczyn (3) *         | Mazowieckie | piaseczyński        | 66,7% | 71,6% | 69,2% | 13,2% | 87,7  | 99,7  |
| 1421011 | Piastów (1)           | Mazowieckie | pruszkowski         | 55,2% | 0,0%  | 86,6% | 17,2% | 49,3  | 60,4  |
| 1421021 | Pruszków (1)          | Mazowieckie | pruszkowski         | 67,8% | 82,1% | 78,4% | 15,3% | 52,5  | 56,3  |
| 1421033 | Brwinów (3)           | Mazowieckie | pruszkowski         | 45,4% | 71,2% | 72,7% | 30,5% | 35,5  | 41,4  |
| 1421042 | Michałowice (2)       | Mazowieckie | pruszkowski         | 83,0% | 85,5% | 81,5% | 12,7% | 57,8  | 57,8  |
| 1421052 | Nadarzyn (2)          | Mazowieckie | pruszkowski         | 55,5% | 75,6% | 69,7% | 8,3%  | 81,6  | 81,6  |
| 1421062 | Raszyn (2)            | Mazowieckie | pruszkowski         | 57,2% | 66,8% | 72,7% | 12,9% | 98,0  | 98,0  |
| 1428011 | Sochaczew (1)         | Mazowieckie | sochaczewski        | 84,6% | 87,2% | 83,0% | 1,6%  | 23,1  | 25,8  |
| 1428022 | Brochów (2) *         | Mazowieckie | sochaczewski        | 67,9% | 63,4% | 52,1% | 2,3%  | 0,0   | 0,0   |
| 1428052 | Nowa Sucha (2)        | Mazowieckie | sochaczewski        | 50,4% | 48,0% | 44,8% | 14,9% | 3,9   | 3,9   |
| 1428072 | Sochaczew (2)         | Mazowieckie | sochaczewski        | 67,5% | 72,7% | 65,3% | 7,5%  | 10,6  | 12,4  |
| 1428082 | Teresin (2)           | Mazowieckie | sochaczewski        | 59,4% | 63,6% | 59,5% | 14,9% | 12,1  | 13,9  |
| 1432013 | Błonie (3)            | Mazowieckie | warszawski-zachodni | 51,3% | 60,2% | 58,7% | 22,1% | 11,1  | 14,5  |
| 1432022 | Izabelin (2)          | Mazowieckie | warszawski-zachodni | 68,0% | 93,0% | 92,5% | 11,1% | 13,8  | 13,8  |
| 1432032 | Kampinos (2)          | Mazowieckie | warszawski-zachodni | 57,3% | 57,0% | 45,9% | 12,1% | 2,4   | 2,4   |
| 1432042 | Leszno (2)            | Mazowieckie | warszawski-zachodni | 59,5% | 66,3% | 61,8% | 11,6% | 25,1  | 25,1  |
| 1432053 | Łomianki (3)          | Mazowieckie | warszawski-zachodni | 77,0% | 85,6% | 83,1% | 2,6%  | 7,6   | 14,0  |
| 1432063 | Ożarów Mazowiecki (2) | Mazowieckie | warszawski-zachodni | 56,9% | 61,4% | 65,8% | 21,7% | 87,5  | 87,5  |
| 1432072 | Stare Babice (2)      | Mazowieckie | warszawski-zachodni | 78,7% | 82,4% | 81,2% | 12,2% | 100,1 | 100,1 |
| 1434011 | Kobyłka (1)           | Mazowieckie | wołomiński          | 87,3% | 90,4% | 90,1% | 9,8%  | 67,5  | 67,6  |
| 1434021 | Marki (1)             | Mazowieckie | wołomiński          | 56,8% | 90,1% | 93,3% | 7,9%  | 91,8  | 97,3  |
| 1434031 | Ząbki (1)             | Mazowieckie | wołomiński          | 88,9% | 50,0% | 86,7% | 0,0%  | 100,2 | 100,2 |
| 1434041 | Zielonka (1)          | Mazowieckie | wołomiński          | 73,3% | 91,7% | 88,4% | 2,2%  | 15,4  | 15,4  |
| 1434052 | Dąbrówka (2)          | Mazowieckie | wołomiński          | 60,5% | 56,6% | 47,0% | 4,5%  | 5,8   | 5,8   |
| 1434072 | Klembów (2)           | Mazowieckie | wołomiński          | 61,6% | 59,9% | 52,6% | 8,4%  | 46,0  | 46,0  |
| 1434082 | Poświętne (2)         | Mazowieckie | wołomiński          | 57,2% | 49,0% | 40,1% | 3,3%  | 1,0   | 1,0   |
| 1434093 | Radzymin (3)          | Mazowieckie | wołomiński          | 70,7% | 72,0% | 69,3% | 6,3%  | 100,8 | 100,8 |
| 1434113 | Tłuszcz (3)           | Mazowieckie | wołomiński          | 76,4% | 75,4% | 71,2% | 3,5%  | 10,5  | 10,5  |
| 1434123 | Wołomin (3)           | Mazowieckie | wołomiński          | 79,5% | 86,9% | 84,4% | 2,6%  | 2,0   | 2,0   |
| 1435042 | Somianka (2)          | Mazowieckie | wyszkowski          | 32,9% | 35,4% | 31,7% | 22,6% | 5,1   | 5,1   |
| 1435053 | Wyszków (3)           | Mazowieckie | wyszkowski          | 69,2% | 71,3% | 69,0% | 7,0%  | 99,1  | 99,1  |
| 1435062 | Zabrodzie (2)         | Mazowieckie | wyszkowski          | 53,5% | 53,2% | 46,2% | 9,9%  | 4,6   | 4,6   |
| 1438011 | Żyrardów (1)          | Mazowieckie | żyrardowski         | 86,1% | 91,1% | 87,5% | 1,6%  | 35,1  | 36,0  |
| 1438023 | Mszczonów (3)         | Mazowieckie | żyrardowski         | 58,3% | 54,5% | 50,8% | 15,3% | 9,6   | 9,7   |
| 1438032 | Puszcza Mariańska (2) | Mazowieckie | żyrardowski         | 72,4% | 70,3% | 65,0% | 4,6%  | 23,8  | 23,8  |
| 1438042 | Radziejowice (2)      | Mazowieckie | żyrardowski         | 71,9% | 71,8% | 62,0% | 3,9%  | 99,9  | 100,0 |

|         |                     |             |             |       |       |       |       |       |       |
|---------|---------------------|-------------|-------------|-------|-------|-------|-------|-------|-------|
| 1438052 | Wiskitki (2)        | Mazowieckie | żyrardowski | 59,3% | 64,9% | 60,2% | 10,8% | 13,2  | 13,2  |
| 1465011 | M.st.Warszawa (1) * | Mazowieckie | Warszawa    | 71,8% | 85,7% | 83,4% | 16,6% | 23,4  | 27,8  |
| 2204011 | Pruszcz Gdański (1) | Pomorskie   | gdański     | 60,0% | 79,6% | 75,5% | 11,0% | 67,3  | 67,3  |
| 2204022 | Cedry Wielkie (2)   | Pomorskie   | gdański     | 30,4% | 41,4% | 34,3% | 37,8% | 100,0 | 100,0 |
| 2204032 | Kolbudy (2) *       | Pomorskie   | gdański     | 57,0% | 66,9% | 59,5% | 11,8% | 30,6  | 33,5  |
| 2204042 | Pruszcz Gdański (2) | Pomorskie   | gdański     | 43,4% | 54,5% | 46,0% | 17,6% | 86,6  | 86,6  |
| 2204052 | Przywidz (2)        | Pomorskie   | gdański     | 43,4% | 53,8% | 38,0% | 17,0% | 7,2   | 7,7   |
| 2204062 | Pszczółki (2)       | Pomorskie   | gdański     | 34,8% | 41,8% | 34,2% | 25,9% | 11,1  | 19,9  |
| 2204072 | Suchy Dąb (2)       | Pomorskie   | gdański     | 32,5% | 27,8% | 20,8% | 26,5% | 100,5 | 100,5 |
| 2204082 | Trąbki Wielkie (2)  | Pomorskie   | gdański     | 45,3% | 50,5% | 31,3% | 16,5% | 4,7   | 4,7   |
| 2205012 | Chmielno (2)        | Pomorskie   | kartuski    | 32,9% | 34,9% | 34,4% | 26,1% | 6,7   | 6,8   |
| 2205023 | Kartuzy (3)         | Pomorskie   | kartuski    | 44,2% | 50,5% | 46,8% | 16,4% | 3,6   | 4,2   |
| 2205032 | Przodkowo (2)       | Pomorskie   | kartuski    | 34,3% | 35,9% | 26,5% | 19,9% | 8,3   | 8,3   |
| 2205042 | Sierakowice (2)     | Pomorskie   | kartuski    | 28,1% | 30,5% | 28,4% | 25,4% | 6,0   | 9,3   |
| 2205052 | Somonino (2)        | Pomorskie   | kartuski    | 39,4% | 49,1% | 38,2% | 17,3% | 5,5   | 5,5   |
| 2205062 | Stężycza (2)        | Pomorskie   | kartuski    | 26,7% | 33,5% | 26,2% | 22,6% | 26,9  | 46,2  |
| 2205072 | Sulęczyno (2)       | Pomorskie   | kartuski    | 31,7% | 30,3% | 25,7% | 23,4% | 5,9   | 5,9   |
| 2205083 | Żukowo (3)          | Pomorskie   | kartuski    | 42,8% | 49,6% | 38,3% | 22,2% | 7,6   | 13,8  |
| 2208011 | Lębork (1)          | Pomorskie   | łęborski    | 56,2% | 77,3% | 65,5% | 13,1% | 46,4  | 46,4  |
| 2208021 | Łeba (1)            | Pomorskie   | łęborski    | 82,8% | 63,6% | 82,9% | 18,2% | 3,9   | 9,7   |
| 2208032 | Cewice (2)          | Pomorskie   | łęborski    | 36,8% | 40,4% | 37,9% | 19,8% | 2,0   | 2,0   |
| 2208042 | Nowa Wieś Lęborska  | Pomorskie   | łęborski    | 42,6% | 45,5% | 33,3% | 27,0% | 2,3   | 2,3   |
| 2208052 | Wicko (2)           | Pomorskie   | łęborski    | 50,4% | 54,2% | 37,1% | 23,5% | 7,4   | 7,6   |
| 2209011 | Malbork (1)         | Pomorskie   | malborski   | 50,7% | 76,5% | 65,7% | 30,1% | 23,6  | 45,9  |
| 2209032 | Lichnowy (2)        | Pomorskie   | malborski   | 21,8% | 31,4% | 28,7% | 39,9% |       |       |
| 2209042 | Malbork (2)         | Pomorskie   | malborski   | 26,4% | 32,9% | 20,1% | 39,6% | 2,9   | 2,9   |
| 2209062 | Miłoradz (2)        | Pomorskie   | malborski   | 22,3% | 27,9% | 20,4% | 39,0% | 0,0   | 19,1  |
| 2209073 | Nowy Staw (3)       | Pomorskie   | malborski   | 23,0% | 30,6% | 29,7% | 39,2% | 0,1   | 29,9  |
| 2209082 | Stare Pole (2)      | Pomorskie   | malborski   | 33,2% | 32,5% | 27,9% | 32,5% | 5,7   | 42,8  |
| 2210011 | Krynica Morska (1)  | Pomorskie   | nowodworski | 55,6% | 58,8% | 80,0% | 25,0% | 3,4   | 4,5   |
| 2210023 | Nowy Dwór Gdański   | Pomorskie   | nowodworski | 28,0% | 28,6% | 27,4% | 40,6% | 100,0 | 100,0 |
| 2210032 | Ostaszewo (2)       | Pomorskie   | nowodworski | 41,2% | 38,8% | 32,2% | 19,7% | 0,0   | 1,2   |
| 2210042 | Stegna (2)          | Pomorskie   | nowodworski | 39,6% | 41,7% | 35,2% | 31,3% | 1,7   | 9,9   |
| 2210052 | Sztutowo (2)        | Pomorskie   | nowodworski | 32,8% | 35,0% | 38,7% | 42,3% | 34,0  | 34,0  |
| 2211011 | Hel (1)             | Pomorskie   | pucki       | -     | -     | -     | -     | 0,6   | 0,6   |
| 2211031 | Puck (1)            | Pomorskie   | pucki       | 0,0%  | 69,2% | 56,8% | 21,4% | 98,5  | 98,5  |
| 2211041 | Władysławowo (1)    | Pomorskie   | pucki       | 48,8% | 65,9% | 65,4% | 13,9% | 55,4  | 69,3  |

|         |                       |               |              |       |       |       |       |       |       |
|---------|-----------------------|---------------|--------------|-------|-------|-------|-------|-------|-------|
| 2211052 | Kosakowo (2)          | Pomorskie     | pucki        | 49,2% | 60,0% | 43,9% | 27,0% | 34,8  | 42,6  |
| 2211062 | Krokowa (2)           | Pomorskie     | pucki        | 34,5% | 39,7% | 32,7% | 23,5% | 3,9   | 3,9   |
| 2211072 | Puck (2)              | Pomorskie     | pucki        | 38,5% | 41,9% | 39,0% | 27,0% | 5,4   | 5,8   |
| 2214011 | Tczew (1)             | Pomorskie     | tczewski     | 55,1% | 57,1% | 61,8% | 26,9% | 85,2  | 85,2  |
| 2214023 | Gniew (3)             | Pomorskie     | tczewski     | 37,1% | 47,7% | 43,4% | 33,4% | 3,8   | 4,7   |
| 2214032 | Morzeszczyn (2)       | Pomorskie     | tczewski     | 15,3% | 22,3% | 21,6% | 56,1% | 3,5   | 3,5   |
| 2214043 | Pelplin (3)           | Pomorskie     | tczewski     | 20,6% | 31,2% | 30,6% | 44,3% | 0,4   | 0,4   |
| 2214052 | Subkowy (2)           | Pomorskie     | tczewski     | 20,4% | 23,5% | 19,5% | 46,4% | 29,0  | 29,0  |
| 2214062 | Tczew (2)             | Pomorskie     | tczewski     | 25,6% | 38,1% | 28,0% | 37,9% | 5,7   | 6,2   |
| 2215011 | Reda (1)              | Pomorskie     | wejherowski  | 64,5% | 70,1% | 73,8% | 18,2% | 24,6  | 23,1  |
| 2215021 | Rumia (1)             | Pomorskie     | wejherowski  | 70,9% | 77,0% | 72,5% | 14,7% | 21,8  | 21,9  |
| 2215031 | Wejherowo (1)         | Pomorskie     | wejherowski  | 66,1% | 73,3% | 71,2% | 13,9% | 100,5 | 100,5 |
| 2215042 | Choczewo (2)          | Pomorskie     | wejherowski  | 49,8% | 51,0% | 33,9% | 21,4% | 15,8  | 16,8  |
| 2215052 | Gniewino (2)          | Pomorskie     | wejherowski  | 43,2% | 47,0% | 31,6% | 19,0% | 56,5  | 63,5  |
| 2215062 | Linia (2)             | Pomorskie     | wejherowski  | 30,3% | 26,6% | 22,2% | 19,6% | 18,1  | 18,1  |
| 2215072 | Luzino (2)            | Pomorskie     | wejherowski  | 30,7% | 38,2% | 33,2% | 25,6% | 2,0   | 16,5  |
| 2215082 | Łęczyce (2)           | Pomorskie     | wejherowski  | 39,5% | 40,4% | 30,7% | 21,8% | 8,2   | 8,2   |
| 2215092 | Szemud (2)            | Pomorskie     | wejherowski  | 29,3% | 30,5% | 24,6% | 23,1% | 24,5  | 24,5  |
| 2215102 | Wejherowo (2)         | Pomorskie     | wejherowski  | 50,5% | 50,2% | 40,7% | 16,0% | 11,6  | 11,6  |
| 2261011 | Gdańsk (1)            | Pomorskie     | Gdańsk       | 60,4% | 71,2% | 71,4% | 18,9% | 61,3  | 62,8  |
| 2262011 | Gdynia (1)            | Pomorskie     | Gdynia       | 66,8% | 62,6% | 73,5% | 10,3% | 15,7  | 19,5  |
| 2264011 | Sopot (1)             | Pomorskie     | Sopot        | 72,2% | 66,7% | 79,3% | 26,3% | 36,5  | 38,6  |
| 3003011 | Gnieszno (1)          | Wielkopolskie | gnieźnieński | 50,3% | 62,4% | 62,6% | 14,1% | 33,3  | 33,3  |
| 3003023 | Czarniejewo (3)       | Wielkopolskie | gnieźnieński | 33,8% | 37,6% | 38,9% | 36,8% | 4,2   | 4,2   |
| 3003032 | Gnieszno (2)          | Wielkopolskie | gnieźnieński | 26,3% | 32,9% | 25,4% | 42,7% | 3,5   | 4,1   |
| 3003042 | Kiszkowo (2)          | Wielkopolskie | gnieźnieński | 20,6% | 22,4% | 18,0% | 49,7% | 2,2   | 2,2   |
| 3003062 | Łubowo (2)            | Wielkopolskie | gnieźnieński | 21,1% | 28,8% | 22,6% | 44,9% | 31,0  | 31,8  |
| 3005012 | Granowo (2)           | Wielkopolskie | grodziski    | 24,3% | 24,7% | 25,0% | 45,2% | 0,9   | 0,9   |
| 3005023 | Grodzisk Wielkopolski | Wielkopolskie | grodziski    | 40,6% | 45,4% | 45,2% | 34,2% | 4,1   | 4,1   |
| 3011011 | Kościan (1)           | Wielkopolskie | kościański   | 78,6% | 85,7% | 81,4% | 22,0% | 17,5  | 17,5  |
| 3011023 | Czempiń (3)           | Wielkopolskie | kościański   | 15,8% | 19,6% | 22,8% | 58,5% | 0,5   | 0,5   |
| 3011032 | Kościan (2)           | Wielkopolskie | kościański   | 28,0% | 35,6% | 31,1% | 48,6% | 24,5  | 24,7  |
| 3015043 | Nowy Tomyśl (3)       | Wielkopolskie | nowotomski   | 51,0% | 56,6% | 46,7% | 16,3% | 1,7   | 1,7   |
| 3015053 | Opalenica (3)         | Wielkopolskie | nowotomski   | 29,8% | 36,8% | 40,2% | 43,5% | 1,0   | 1,1   |
| 3016013 | Oborniki (3)          | Wielkopolskie | obornicki    | 30,3% | 39,1% | 36,4% | 39,7% | 0,6   | 0,6   |
| 3016023 | Rogoźno (3)           | Wielkopolskie | obornicki    | 32,7% | 42,5% | 34,9% | 36,7% | 2,7   | 2,8   |
| 3021011 | Luboń (1)             | Wielkopolskie | poznański    | 56,3% | 68,8% | 61,2% | 41,7% | 76,7  | 82,6  |

|                                                             |                        |               |             |       |       |       |       |       |       |
|-------------------------------------------------------------|------------------------|---------------|-------------|-------|-------|-------|-------|-------|-------|
| 3021021                                                     | Puszczykowo (1)        | Wielkopolskie | poznański   | 52,9% | 67,9% | 63,2% | 16,7% | 22,4  | 22,4  |
| 3021033                                                     | Buk (3)                | Wielkopolskie | poznański   | 29,1% | 33,8% | 34,2% | 40,7% | 4,1   | 4,4   |
| 3021042                                                     | Czerwonak (2)          | Wielkopolskie | poznański   | 57,7% | 68,0% | 64,6% | 19,0% | 15,4  | 15,4  |
| 3021052                                                     | Dopiewo (2)            | Wielkopolskie | poznański   | 34,3% | 49,8% | 50,0% | 35,6% | 7,9   | 8,0   |
| 3021062                                                     | Kleszczewo (2)         | Wielkopolskie | poznański   | 17,9% | 15,5% | 14,1% | 59,6% | 100,0 | 100,0 |
| 3021072                                                     | Komorniki (2)          | Wielkopolskie | poznański   | 38,5% | 49,8% | 44,9% | 31,7% | 29,6  | 34,7  |
| 3021083                                                     | Kostrzyn (3)           | Wielkopolskie | poznański   | 28,0% | 30,9% | 28,7% | 46,1% | 4,3   | 4,3   |
| 3021093                                                     | Kórnik (3)             | Wielkopolskie | poznański   | 33,5% | 40,8% | 39,6% | 41,3% | 9,8   | 11,6  |
| 3021103                                                     | Mosina (3)             | Wielkopolskie | poznański   | 37,9% | 49,6% | 47,9% | 38,8% | 8,6   | 8,7   |
| 3021113                                                     | Murowana Goślina (3)   | Wielkopolskie | poznański   | 36,3% | 52,9% | 51,2% | 34,2% | 21,1  | 4,5   |
| 3021123                                                     | Pobiedziska (3)        | Wielkopolskie | poznański   | 24,8% | 35,7% | 31,0% | 41,3% | 17,3  | 17,3  |
| 3021132                                                     | Rokietnica (2)         | Wielkopolskie | poznański   | 40,7% | 50,9% | 54,6% | 32,5% | 9,3   | 9,3   |
| 3021143                                                     | Stęszew (3)            | Wielkopolskie | poznański   | 23,7% | 34,5% | 33,8% | 52,4% | 3,5   | 3,5   |
| 3021152                                                     | Suchy Las (2)          | Wielkopolskie | poznański   | 53,6% | 57,2% | 55,6% | 28,7% | 73,0  | 73,3  |
| 3021163                                                     | Swarzędz (3)           | Wielkopolskie | poznański   | 39,2% | 42,6% | 47,0% | 33,8% | 3,9   | 4,8   |
| 3021172                                                     | Tarnowo Podgórne (2)   | Wielkopolskie | poznański   | 41,2% | 48,8% | 43,2% | 30,4% | 35,7  | 38,1  |
| 3024022                                                     | Duszniki (2)           | Wielkopolskie | szamotulski | 25,4% | 29,6% | 30,6% | 42,5% | 4,2   | 4,4   |
| 3024032                                                     | Kaźmierz (2)           | Wielkopolskie | szamotulski | 28,4% | 28,4% | 28,0% | 43,0% | 4,7   | 4,9   |
| 3024073                                                     | Szamotuły (3)          | Wielkopolskie | szamotulski | 36,5% | 39,9% | 42,5% | 30,4% | 2,8   | 3,2   |
| 3025012                                                     | Dominowo (2)           | Wielkopolskie | średzki     | 23,3% | 24,3% | 22,7% | 53,2% | 0,1   | 0,1   |
| 3025043                                                     | Środa Wielkopolska (2) | Wielkopolskie | średzki     | 26,9% | 24,6% | 26,5% | 46,9% | 6,3   | 6,3   |
| 3025052                                                     | Zaniemyśl (2)          | Wielkopolskie | średzki     | 18,8% | 28,6% | 30,4% | 49,8% | 2,6   | 2,8   |
| 3026012                                                     | Brodnica (2)           | Wielkopolskie | śremski     | 22,4% | 24,8% | 29,6% | 52,0% | 0,2   | 0,2   |
| 3026043                                                     | Śrem (3)               | Wielkopolskie | śremski     | 33,7% | 38,2% | 37,4% | 36,5% | 12,3  | 26,4  |
| 3028011                                                     | Wągrowiec (1)          | Wielkopolskie | wągrowiecki | 64,9% | 93,1% | 73,8% | 16,3% | 56,4  | 57,1  |
| 3028053                                                     | Skoki (3)              | Wielkopolskie | wągrowiecki | 28,2% | 31,8% | 27,3% | 30,5% | 1,4   | 1,4   |
| 3028072                                                     | Wągrowiec (2)          | Wielkopolskie | wągrowiecki | 24,0% | 29,1% | 24,8% | 46,3% | 0,4   | 0,4   |
| 3030033                                                     | Nekla (3) *            | Wielkopolskie | wrzeński    | 31,6% | 36,8% | 38,5% | 35,9% | 11,5  | 11,6  |
| 3030053                                                     | Września (3)           | Wielkopolskie | wrzeński    | 30,6% | 33,9% | 34,1% | 39,0% | 3,6   | 4,0   |
| 3064011                                                     | Poznań (1)             | Wielkopolskie | Poznań      | 51,7% | 65,7% | 62,0% | 23,3% | 25,4  | 28,9  |
| Source: data from Poland's Central Statistical Office (GUS) |                        |               |             |       |       |       |       |       |       |
