# Supplementary material
Source: MDPI journal article supplement (https://www.mdpi.com/2071-1050/10/3/837)
Supplement: s1 [file s1]

| KOD GUS | Municipality     | Surface area of a municipality ( for 1996-2010) [thou. ha] |        |        |        |        |        |        |        |        |        |        |        |        |        |        |
|---------|------------------|------------------------------------------------------------|--------|--------|--------|--------|--------|--------|--------|--------|--------|--------|--------|--------|--------|--------|
|         |                  | 1996                                                       | 1997   | 1998   | 1999   | 2000   | 2001   | 2002   | 2003   | 2004   | 2005   | 2006   | 2007   | 2008   | 2009   | 2010   |
| 0214011 | Oleśnica (1)     | 2 095                                                      | 2 095  | 2 095  | 2 095  | 2 095  | 2 095  | 2 095  | 2 095  | 2 095  | 2 095  | 2 096  | 2 096  | 2 096  | 2 096  | 2 096  |
| 0214032 | Dobroszyce (2)   | 13 174                                                     | 13 174 | 13 174 | 13 174 | 13 174 | 13 174 | 13 174 | 13 174 | 13 174 | 13 174 | 13 196 | 13 196 | 13 196 | 13 196 | 13 196 |
| 0214062 | Oleśnica (2)     | 24 344                                                     | 24 344 | 24 344 | 24 344 | 24 344 | 24 344 | 24 344 | 24 344 | 24 344 | 24 344 | 24 286 | 24 286 | 24 285 | 24 285 | 24 285 |
| 0215011 | Oława (1)        | 2 734                                                      | 2 734  | 2 734  | 2 734  | 2 734  | 2 734  | 2 734  | 2 734  | 2 734  | 2 734  | 2 736  | 2 736  | 2 736  | 2 736  | 2 736  |
| 0215022 | Domaniów (2)     | 9 431                                                      | 9 431  | 9 431  | 9 431  | 9 431  | 9 431  | 9 431  | 9 431  | 9 431  | 9 431  | 9 446  | 9 446  | 9 446  | 9 446  | 9 446  |
| 0215033 | Jelcz-Laskowice  | 16 810                                                     | 16 810 | 16 810 | 16 810 | 16 810 | 16 810 | 16 810 | 16 810 | 16 810 | 16 810 | 16 763 | 16 763 | 16 763 | 16 763 | 16 763 |
| 0215042 | Oława (2)        | 23 398                                                     | 23 398 | 23 398 | 23 398 | 23 398 | 23 398 | 23 398 | 23 398 | 23 398 | 23 398 | 23 467 | 23 467 | 23 467 | 23 465 | 23 465 |
| 0217012 | Borów (2)        | 9 866                                                      | 9 866  | 9 866  | 9 866  | 9 866  | 9 866  | 9 866  | 9 866  | 9 866  | 9 866  | 9 865  | 9 865  | 9 865  | 9 865  | 9 865  |
| 0218012 | Kostomłoty (2)   | 14 625                                                     | 14 625 | 14 625 | 14 625 | 14 625 | 14 625 | 14 625 | 14 625 | 14 625 | 14 625 | 14 524 | 14 524 | 14 524 | 14 524 | 14 524 |
| 0218032 | Miękinia (2)     | 17 924                                                     | 17 924 | 17 924 | 17 924 | 17 924 | 17 924 | 17 924 | 17 924 | 17 924 | 17 924 | 17 948 | 17 948 | 17 948 | 17 948 | 17 948 |
| 0218043 | Środa Śląska (3) | 21 493                                                     | 21 493 | 21 493 | 21 493 | 21 493 | 21 493 | 21 493 | 21 493 | 21 493 | 21 493 | 21 596 | 21 596 | 21 596 | 21 596 | 21 596 |
| 0220013 | Oborniki Śląskie | 15 375                                                     | 15 375 | 15 375 | 15 375 | 15 375 | 15 375 | 15 375 | 15 375 | 15 375 | 15 375 | 15 426 | 15 426 | 15 426 | 15 426 | 15 426 |
| 0220023 | Prusice (3) *    | 15 802                                                     | 15 802 | 15 802 | 15 802 | 15 802 | 15 802 | 15 802 | 15 802 | 15 802 | 15 802 | 15 798 | 15 798 | 15 798 | 15 798 | 15 798 |
| 0220033 | Trzebnica (3)    | 20 019                                                     | 20 019 | 20 019 | 20 019 | 20 019 | 20 019 | 20 019 | 20 019 | 20 019 | 20 019 | 19 995 | 19 996 | 19 996 | 19 996 | 19 996 |
| 0220042 | Wisznia Mała (2) | 10 333                                                     | 10 333 | 10 333 | 10 333 | 10 333 | 10 333 | 10 333 | 10 333 | 10 333 | 10 333 | 10 336 | 10 336 | 10 336 | 10 336 | 10 336 |
| 0220052 | Zawonia (2)      | 11 812                                                     | 11 812 | 11 812 | 11 812 | 11 812 | 11 812 | 11 812 | 11 812 | 11 812 | 11 812 | 11 746 | 11 745 | 11 745 | 11 745 | 11 745 |
| 0222013 | Brzeg Dolny (3)  | 9 440                                                      | 9 440  | 9 440  | 9 440  | 9 440  | 9 440  | 9 440  | 9 440  | 9 440  | 9 440  | 9 440  | 9 440  | 9 440  | 9 440  | 9 440  |
| 0223012 | Czernica (2)     | 8 418                                                      | 8 418  | 8 418  | 8 418  | 8 418  | 8 418  | 8 418  | 8 418  | 8 418  | 8 418  | 8 363  | 8 363  | 8 363  | 8 363  | 8 363  |
| 0223022 | Długoleś (2)     | 21 241                                                     | 21 241 | 21 241 | 21 241 | 21 241 | 21 241 | 21 241 | 21 241 | 21 241 | 21 241 | 21 283 | 21 283 | 21 283 | 21 284 | 21 284 |
| 0223032 | Jordanów Śląski  | 5 662                                                      | 5 662  | 5 662  | 5 662  | 5 662  | 5 662  | 5 662  | 5 662  | 5 662  | 5 662  | 5 669  | 5 669  | 5 669  | 5 669  | 5 669  |
| 0223043 | Kąty Wrocławskie | 17 650                                                     | 17 650 | 17 650 | 17 650 | 17 650 | 17 650 | 17 650 | 17 650 | 17 650 | 17 650 | 17 666 | 17 666 | 17 666 | 17 666 | 17 666 |
| 0223052 | Kobierzyce (2)   | 14 911                                                     | 14 911 | 14 911 | 14 911 | 14 911 | 14 911 | 14 911 | 14 911 | 14 911 | 14 911 | 14 926 | 14 926 | 14 926 | 14 926 | 14 926 |
| 0223062 | Mietków (2)      | 8 330                                                      | 8 330  | 8 330  | 8 330  | 8 330  | 8 330  | 8 330  | 8 330  | 8 330  | 8 330  | 8 338  | 8 338  | 8 338  | 8 338  | 8 338  |
| 0223073 | Sobótka (3)      | 13 535                                                     | 13 535 | 13 535 | 13 535 | 13 535 | 13 535 | 13 535 | 13 535 | 13 535 | 13 535 | 13 626 | 13 626 | 13 626 | 13 626 | 13 626 |
| 0223083 | Siechnice (3) *  | 9 857                                                      | 9 857  | 9 857  | 9 857  | 9 857  | 9 857  | 9 857  | 9 857  | 9 857  | 9 857  | 9 871  | 9 871  | 9 871  | 9 871  | 9 871  |
| 0223092 | Żórawina (2)     | 12 011                                                     | 12 011 | 12 011 | 12 011 | 12 011 | 12 011 | 12 011 | 12 011 | 12 011 | 12 011 | 12 027 | 12 027 | 12 027 | 12 027 | 12 027 |
| 0264011 | Wrocław (1)      | 29 284                                                     | 29 284 | 29 284 | 29 284 | 29 284 | 29 284 | 29 284 | 29 284 | 29 284 | 29 284 | 29 282 | 29 282 | 29 282 | 29 282 | 29 282 |
| 0608011 | Lubartów (1)     | 1 392                                                      | 1 392  | 1 392  | 1 392  | 1 392  | 1 392  | 1 392  | 1 392  | 1 392  | 1 392  | 1 391  | 1 391  | 1 391  | 1 391  | 1 391  |
| 0608072 | Lubartów (2)     | 15 894                                                     | 15 894 | 15 894 | 15 894 | 15 894 | 15 894 | 15 894 | 15 894 | 15 894 | 15 894 | 15 871 | 15 871 | 15 871 | 15 871 | 15 870 |
| 0609013 | Bełżyce (3)      | 13 385                                                     | 13 385 | 13 385 | 13 385 | 13 385 | 13 385 | 13 385 | 13 385 | 13 385 | 13 385 | 13 397 | 13 397 | 13 397 | 13 397 | 13 397 |
| 0609033 | Bychawa (3)      | 14 619                                                     | 14 619 | 14 619 | 14 619 | 14 619 | 14 619 | 14 619 | 14 619 | 14 619 | 14 619 | 14 639 | 14 638 | 14 638 | 14 638 | 14 638 |
| 0609042 | Garbów (2)       | 10 242                                                     | 10 242 | 10 242 | 10 242 | 10 242 | 10 242 | 10 242 | 10 242 | 10 242 | 10 242 | 10 262 | 10 262 | 10 262 | 10 262 | 10 262 |
| 0609052 | Głusk (2)        | 6 400                                                      | 6 400  | 6 400  | 6 400  | 6 400  | 6 400  | 6 400  | 6 400  | 6 400  | 6 400  | 6 426  | 6 426  | 6 426  | 6 426  | 6 426  |
| 0609062 | Jabłonna (2)     | 6 455                                                      | 6 455  | 6 455  | 6 455  | 6 455  | 6 455  | 6 455  | 6 455  | 6 455  | 6 455  | 6 480  | 6 480  | 6 480  | 6 480  | 6 480  |
| 0609072 | Jastków (2)      | 11 376                                                     | 11 376 | 11 376 | 11 376 | 11 376 | 11 376 | 11 376 | 11 376 | 11 376 | 11 376 | 11 313 | 11 314 | 11 314 | 11 314 | 11 314 |

|         |                      |        |        |        |        |        |        |        |        |        |        |        |        |        |        |        |
|---------|----------------------|--------|--------|--------|--------|--------|--------|--------|--------|--------|--------|--------|--------|--------|--------|--------|
| 0609082 | Konopnica (2)        | 9 275  | 9 275  | 9 275  | 9 275  | 9 275  | 9 275  | 9 275  | 9 275  | 9 275  | 9 275  | 9 307  | 9 307  | 9 307  | 9 307  | 9 307  |
| 0609102 | Niedrzwica Duża      | 10 682 | 10 682 | 10 682 | 10 682 | 10 682 | 10 682 | 10 682 | 10 682 | 10 682 | 10 682 | 10 673 | 10 673 | 10 673 | 10 673 | 10 673 |
| 0609112 | Niemce (2)           | 14 116 | 14 116 | 14 116 | 14 116 | 14 116 | 14 116 | 14 116 | 14 116 | 14 116 | 14 116 | 14 111 | 14 111 | 14 111 | 14 111 | 14 111 |
| 0609122 | Strzyżewice (2)      | 10 884 | 10 884 | 10 884 | 10 884 | 10 884 | 10 884 | 10 884 | 10 884 | 10 884 | 10 884 | 10 879 | 10 879 | 10 879 | 10 879 | 10 879 |
| 0609132 | Wojciechów (2)       | 8 092  | 8 092  | 8 092  | 8 092  | 8 092  | 8 092  | 8 092  | 8 092  | 8 092  | 8 092  | 8 079  | 8 079  | 8 079  | 8 079  | 8 079  |
| 0609142 | Wólka (2)            | 7 265  | 7 265  | 7 265  | 7 265  | 7 265  | 7 265  | 7 265  | 7 265  | 7 265  | 7 265  | 7 275  | 7 275  | 7 275  | 7 275  | 7 275  |
| 0610033 | Łączna (3)           | 7 490  | 7 490  | 7 490  | 7 490  | 7 490  | 7 490  | 7 490  | 7 490  | 7 490  | 7 490  | 7 514  | 7 514  | 7 514  | 7 514  | 7 514  |
| 0610062 | Spiczyn (2)          | 8 310  | 8 310  | 8 310  | 8 310  | 8 310  | 8 310  | 8 310  | 8 310  | 8 310  | 8 310  | 8 315  | 8 315  | 8 315  | 8 315  | 8 315  |
| 0614083 | Nałęczów (3)         | 6 286  | 6 286  | 6 286  | 6 286  | 6 286  | 6 286  | 6 286  | 6 286  | 6 286  | 6 286  | 6 293  | 6 293  | 6 293  | 6 293  | 6 293  |
| 0617011 | Świdnik (1)          | 2 035  | 2 035  | 2 035  | 2 035  | 2 035  | 2 035  | 2 035  | 2 035  | 2 035  | 2 035  | 2 035  | 2 035  | 2 035  | 2 035  | 2 035  |
| 0617022 | Melgiew (2)          | 9 564  | 9 564  | 9 564  | 9 564  | 9 564  | 9 564  | 9 564  | 9 564  | 9 564  | 9 564  | 9 485  | 9 485  | 9 485  | 9 485  | 9 485  |
| 0617033 | Piaski (3)           | 16 973 | 16 973 | 16 973 | 16 973 | 16 973 | 16 973 | 16 973 | 16 973 | 16 973 | 16 973 | 16 984 | 16 984 | 16 984 | 16 984 | 16 984 |
| 0663011 | Lublin (1)           | 14 750 | 14 750 | 14 750 | 14 750 | 14 750 | 14 750 | 14 750 | 14 750 | 14 750 | 14 750 | 14 745 | 14 745 | 14 745 | 14 745 | 14 745 |
| 1201011 | Bochnia (1)          | 2 989  | 2 989  | 2 989  | 2 989  | 2 989  | 2 989  | 2 989  | 2 989  | 2 989  | 2 989  | 2 987  | 2 987  | 2 987  | 2 987  | 2 987  |
| 1201022 | Bochnia (2)          | 11 369 | 11 369 | 11 369 | 11 369 | 11 369 | 11 369 | 11 369 | 11 369 | 11 369 | 13 149 | 13 149 | 13 087 | 13 087 | 13 087 | 13 087 |
| 1201032 | Drwinia (2)          | 10 881 | 10 881 | 10 881 | 10 881 | 10 881 | 10 881 | 10 881 | 10 881 | 10 881 | 10 881 | 10 833 | 10 833 | 10 833 | 10 833 | 10 833 |
| 1201052 | Łapanów (2)          | 7 118  | 7 118  | 7 118  | 7 118  | 7 118  | 7 118  | 7 118  | 7 118  | 7 118  | 7 118  | 7 170  | 7 170  | 7 170  | 7 170  | 7 170  |
| 1201063 | Nowy Wiśnicz (1)     | 8 249  | 8 249  | 8 249  | 8 249  | 8 249  | 8 249  | 8 249  | 8 249  | 8 249  | 8 249  | 8 216  | 8 216  | 8 216  | 8 216  | 8 216  |
| 1201072 | Rzezawa (2)          | 8 548  | 8 548  | 8 548  | 8 548  | 8 548  | 8 548  | 8 548  | 8 548  | 8 548  | 8 548  | 8 635  | 8 635  | 8 635  | 8 635  | 8 635  |
| 1201082 | Trzciana (2)         | 4 086  | 4 086  | 4 409  | 4 409  | 4 409  | 4 409  | 4 409  | 4 409  | 4 409  | 4 409  | 4 409  | 4 409  | 4 409  | 4 409  | 4 409  |
| 1201092 | Żegocina (2)         | 3 846  | 3 846  | 3 523  | 3 523  | 3 523  | 3 523  | 3 523  | 3 523  | 3 523  | 3 523  | 3 489  | 3 489  | 3 489  | 3 489  | 3 489  |
| 1206012 | Czernichów (2)       | 8 380  | 8 380  | 8 380  | 8 380  | 8 380  | 8 380  | 8 380  | 8 380  | 8 380  | 8 380  | 8 509  | 8 509  | 8 509  | 8 422  | 8 422  |
| 1206022 | Igołomia-Wawrzyszew  | 6 259  | 6 259  | 6 259  | 6 259  | 6 259  | 6 259  | 6 259  | 6 259  | 6 259  | 6 259  | 6 279  | 6 279  | 6 279  | 6 279  | 6 279  |
| 1206032 | Iwanowice (2)        | 7 062  | 7 062  | 7 062  | 7 062  | 7 062  | 7 062  | 7 062  | 7 062  | 7 062  | 7 062  | 7 109  | 7 109  | 7 109  | 7 109  | 7 109  |
| 1206042 | Jerzmanowice-Prusice | 6 839  | 6 839  | 6 839  | 6 839  | 6 839  | 6 839  | 6 839  | 6 839  | 6 839  | 6 839  | 6 814  | 6 814  | 6 814  | 6 814  | 6 814  |
| 1206052 | Kocmyrzów-Lubasz     | 8 253  | 8 253  | 8 253  | 8 253  | 8 253  | 8 253  | 8 253  | 8 253  | 8 253  | 8 253  | 8 081  | 8 081  | 8 081  | 8 081  | 8 081  |
| 1206063 | Krzeszowice (3)      | 13 937 | 13 937 | 13 937 | 13 937 | 13 937 | 13 937 | 13 937 | 13 937 | 13 937 | 13 937 | 13 904 | 13 904 | 13 904 | 13 904 | 13 904 |
| 1206072 | Liszki (2)           | 7 203  | 7 203  | 7 203  | 7 203  | 7 203  | 7 203  | 7 203  | 7 203  | 7 203  | 7 203  | 7 207  | 7 207  | 7 207  | 7 207  | 7 207  |
| 1206082 | Michałowice (2)      | 3 488  | 3 488  | 3 488  | 3 488  | 3 488  | 3 488  | 3 488  | 3 488  | 3 488  | 3 488  | 3 473  | 3 473  | 3 473  | 3 473  | 3 473  |
| 1206092 | Mogilany (2)         | 4 355  | 4 355  | 4 355  | 4 355  | 4 355  | 4 355  | 4 355  | 4 355  | 4 355  | 4 355  | 4 363  | 4 363  | 4 363  | 4 363  | 4 363  |
| 1206103 | Skala (3)            | 7 430  | 7 430  | 7 430  | 7 430  | 7 430  | 7 430  | 7 430  | 7 430  | 7 430  | 7 430  | 7 483  | 7 483  | 7 483  | 7 483  | 7 483  |
| 1206113 | Skawina (3)          | 10 015 | 10 015 | 10 015 | 10 015 | 10 015 | 10 015 | 10 015 | 10 015 | 10 015 | 10 015 | 9 984  | 9 984  | 9 984  | 9 984  | 9 984  |
| 1206123 | Ślomniki (3)         | 11 138 | 11 138 | 11 138 | 11 138 | 11 138 | 11 138 | 11 138 | 11 138 | 11 138 | 11 138 | 11 298 | 11 298 | 11 298 | 11 298 | 11 298 |
| 1206132 | Sułoszowa (2)        | 5 338  | 5 338  | 5 338  | 5 338  | 5 338  | 5 338  | 5 338  | 5 338  | 5 338  | 5 338  | 5 338  | 5 338  | 5 338  | 5 338  | 5 338  |
| 1206143 | Świątniki Górne      | 2 017  | 2 017  | 2 017  | 2 017  | 2 017  | 2 017  | 2 017  | 2 017  | 2 017  | 2 017  | 2 035  | 2 035  | 2 035  | 2 035  | 2 035  |
| 1206152 | Wielka Wieś (2)      | 4 810  | 4 810  | 4 810  | 4 810  | 4 810  | 4 810  | 4 810  | 4 810  | 4 810  | 4 810  | 4 827  | 4 827  | 4 827  | 4 827  | 4 827  |
| 1206162 | Zabierzów (2)        | 9 959  | 9 959  | 9 959  | 9 959  | 9 959  | 9 959  | 9 959  | 9 959  | 9 959  | 9 959  | 9 942  | 9 942  | 9 942  | 9 942  | 9 942  |

|         |                         |        |        |        |        |        |        |        |        |        |        |        |        |        |        |        |
|---------|-------------------------|--------|--------|--------|--------|--------|--------|--------|--------|--------|--------|--------|--------|--------|--------|--------|
| 1206172 | Zielonki (2)            | 4 840  | 4 840  | 4 840  | 4 840  | 4 840  | 4 840  | 4 840  | 4 840  | 4 840  | 4 840  | 4 858  | 4 858  | 4 858  | 4 858  | 4 858  |
| 1208022 | Gołcza (2)              | 9 027  | 9 027  | 9 027  | 9 027  | 9 027  | 9 027  | 9 027  | 9 027  | 9 027  | 9 027  | 9 002  | 9 002  | 9 002  | 9 002  | 9 002  |
| 1209013 | Dobczyce (3)            | 6 663  | 6 663  | 6 663  | 6 663  | 6 663  | 6 663  | 6 663  | 6 663  | 6 663  | 6 663  | 6 639  | 6 639  | 6 639  | 6 639  | 6 639  |
| 1209022 | Lubień (2)              | 7 501  | 7 501  | 7 501  | 7 501  | 7 501  | 7 501  | 7 501  | 7 501  | 7 501  | 7 501  | 7 510  | 7 510  | 7 510  | 7 510  | 7 510  |
| 1209033 | Myślenice (3)           | 15 374 | 15 374 | 15 374 | 15 374 | 15 374 | 15 374 | 15 374 | 15 374 | 15 374 | 15 374 | 15 352 | 15 352 | 15 352 | 15 352 | 15 352 |
| 1209042 | Pcim (2)                | 8 859  | 8 859  | 8 859  | 8 859  | 8 859  | 8 859  | 8 859  | 8 859  | 8 859  | 8 859  | 8 896  | 8 896  | 8 896  | 8 896  | 8 896  |
| 1209052 | Raciechowice (2)        | 6 097  | 6 097  | 6 097  | 6 097  | 6 097  | 6 097  | 6 097  | 6 097  | 6 097  | 6 097  | 6 115  | 6 115  | 6 115  | 6 115  | 6 115  |
| 1209062 | Siepraw (2)             | 3 192  | 3 192  | 3 192  | 3 192  | 3 192  | 3 192  | 3 192  | 3 192  | 3 192  | 3 192  | 3 185  | 3 185  | 3 185  | 3 185  | 3 185  |
| 1209073 | Sułkowice (3)           | 6 053  | 6 053  | 6 053  | 6 053  | 6 053  | 6 053  | 6 053  | 6 053  | 6 053  | 6 053  | 6 038  | 6 038  | 6 038  | 6 038  | 6 038  |
| 1209082 | Tokarnia (2)            | 6 885  | 6 885  | 6 885  | 6 885  | 6 885  | 6 885  | 6 885  | 6 885  | 6 885  | 6 885  | 6 863  | 6 863  | 6 863  | 6 863  | 6 863  |
| 1209092 | Wiśniowa (2)            | 6 706  | 6 706  | 6 706  | 6 706  | 6 706  | 6 706  | 6 706  | 6 706  | 6 706  | 6 706  | 6 710  | 6 710  | 6 710  | 6 710  | 6 710  |
| 1212062 | Trzyciąż (2)            | 9 656  | 9 656  | 9 656  | 9 656  | 9 656  | 9 656  | 9 656  | 9 656  | 9 656  | 9 656  | 9 573  | 9 573  | 9 573  | 9 573  | 9 573  |
| 1214012 | Koniusza (2)            | 8 850  | 8 850  | 8 850  | 8 850  | 8 850  | 8 850  | 8 850  | 8 850  | 8 850  | 8 850  | 8 852  | 8 852  | 8 852  | 8 852  | 8 852  |
| 1214022 | Koszyce (2)             | 6 596  | 6 596  | 6 596  | 6 596  | 6 596  | 6 596  | 6 596  | 6 596  | 6 596  | 6 596  | 6 606  | 6 606  | 6 606  | 6 606  | 6 606  |
| 1214032 | Nowe Brzesko (2)        | 5 453  | 5 453  | 5 453  | 5 453  | 5 453  | 5 453  | 5 453  | 5 453  | 5 453  | 5 453  | 5 442  | 5 442  | 5 442  | 5 442  | 5 442  |
| 1214053 | Proszowice (3)          | 9 978  | 9 978  | 9 978  | 9 978  | 9 978  | 9 978  | 9 978  | 9 978  | 9 978  | 9 978  | 10 002 | 10 002 | 10 002 | 10 002 | 10 002 |
| 1218022 | Brzeźnica (2)           | 7 008  | 7 008  | 7 008  | 7 008  | 7 008  | 7 008  | 7 008  | 7 008  | 7 008  | 7 008  | 6 846  | 6 555  | 6 555  | 6 643  | 6 643  |
| 1218033 | Kalwaria Zebrzydzka (2) | 7 532  | 7 532  | 7 532  | 7 532  | 7 532  | 7 532  | 7 532  | 7 532  | 7 532  | 7 532  | 7 526  | 7 526  | 7 526  | 7 526  | 7 526  |
| 1218042 | Lanckorona (2)          | 4 061  | 4 061  | 4 061  | 4 061  | 4 061  | 4 061  | 4 061  | 4 061  | 4 061  | 4 061  | 4 043  | 4 043  | 4 043  | 4 043  | 4 043  |
| 1218072 | Stryszów (2)            | 4 605  | 4 605  | 4 605  | 4 605  | 4 605  | 4 605  | 4 605  | 4 605  | 4 605  | 4 605  | 4 590  | 4 590  | 4 590  | 4 590  | 4 590  |
| 1218093 | Wadowice (3)            | 11 249 | 11 249 | 11 249 | 11 249 | 11 249 | 11 249 | 11 249 | 11 249 | 11 249 | 11 249 | 11 283 | 11 283 | 11 283 | 11 283 | 11 283 |
| 1219012 | Biskupice (2)           | 4 099  | 4 099  | 4 099  | 4 099  | 4 099  | 4 099  | 4 099  | 4 099  | 4 099  | 4 099  | 4 114  | 4 114  | 4 114  | 4 114  | 4 114  |
| 1219022 | Gdów (2)                | 10 854 | 10 854 | 10 854 | 10 854 | 10 854 | 10 854 | 10 854 | 10 854 | 10 854 | 10 854 | 10 871 | 10 872 | 10 872 | 10 872 | 10 872 |
| 1219032 | Kłaj (2)                | 8 310  | 8 310  | 8 310  | 8 310  | 8 310  | 8 310  | 8 310  | 8 310  | 6 530  | 6 530  | 6 498  | 6 498  | 6 498  | 6 498  | 6 498  |
| 1219043 | Niepołomice (3)         | 9 511  | 9 511  | 9 511  | 9 511  | 9 511  | 9 511  | 9 511  | 9 511  | 9 511  | 9 511  | 9 627  | 9 627  | 9 627  | 9 627  | 9 627  |
| 1219053 | Wieliczka (3)           | 10 004 | 10 004 | 10 004 | 10 004 | 10 004 | 10 004 | 10 004 | 10 004 | 10 004 | 10 004 | 9 968  | 9 967  | 9 967  | 9 967  | 9 967  |
| 1261011 | Kraków (1)              | 32 684 | 32 684 | 32 684 | 32 684 | 32 684 | 32 684 | 32 684 | 32 684 | 32 684 | 32 684 | 32 680 | 32 680 | 32 680 | 32 680 | 32 680 |
| 1405011 | Milanówek (1)           | 1 352  | 1 352  | 1 352  | 1 352  | 1 352  | 1 352  | 1 352  | 1 352  | 1 352  | 1 352  | 1 344  | 1 344  | 1 344  | 1 344  | 1 344  |
| 1405021 | Podkowa Leśna (1)       | 1 010  | 1 010  | 1 010  | 1 010  | 1 010  | 1 010  | 1 010  | 1 010  | 1 010  | 1 010  | 1 013  | 1 013  | 1 013  | 1 013  | 1 013  |
| 1405032 | Baranów (2)             | 7 537  | 7 537  | 7 537  | 7 537  | 7 537  | 7 537  | 7 537  | 7 537  | 7 537  | 7 537  | 7 534  | 7 534  | 7 534  | 7 534  | 7 534  |
| 1405043 | Grodzisk Mazowiecki (2) | 10 703 | 10 703 | 10 703 | 10 703 | 10 703 | 10 703 | 10 703 | 10 703 | 10 703 | 10 703 | 10 996 | 10 733 | 10 733 | 10 733 | 10 740 |
| 1405052 | Jaktorów (2)            | 5 524  | 5 524  | 5 524  | 5 524  | 5 524  | 5 524  | 5 524  | 5 524  | 5 524  | 5 524  | 5 530  | 5 530  | 5 530  | 5 530  | 5 530  |
| 1405062 | Żabia Wola (2)          | 10 561 | 10 561 | 10 561 | 10 561 | 10 561 | 10 561 | 10 561 | 10 561 | 10 561 | 10 561 | 10 280 | 10 543 | 10 543 | 10 543 | 10 543 |
| 1406032 | Chynów (2)              | 13 707 | 13 707 | 13 707 | 13 707 | 13 707 | 13 707 | 13 707 | 13 707 | 13 707 | 13 707 | 13 499 | 13 499 | 13 499 | 13 499 | 13 499 |
| 1406053 | Grójec (3)              | 12 064 | 12 064 | 12 064 | 12 064 | 12 064 | 12 064 | 12 064 | 12 064 | 12 064 | 12 064 | 12 135 | 12 135 | 12 135 | 12 135 | 12 135 |
| 1406092 | Pniewy (2)              | 10 205 | 10 205 | 10 205 | 10 205 | 10 205 | 10 205 | 10 205 | 10 205 | 10 205 | 10 205 | 10 230 | 10 230 | 10 232 | 10 232 | 10 232 |
| 1408011 | Legionowo (1)           | 1 360  | 1 360  | 1 360  | 1 360  | 1 360  | 1 360  | 1 360  | 1 360  | 1 360  | 1 360  | 1 354  | 1 354  | 1 354  | 1 354  | 1 354  |

|         |                  |        |        |        |        |        |        |        |        |        |        |        |        |        |        |        |
|---------|------------------|--------|--------|--------|--------|--------|--------|--------|--------|--------|--------|--------|--------|--------|--------|--------|
| 1408022 | Jabłonna (2)     | 13 098 | 13 098 | 13 098 | 13 098 | 13 098 | 13 098 | 13 098 | 13 098 | 13 098 | 13 098 | 13 120 | 13 120 | 13 120 | 13 120 | 13 120 |
| 1408032 | Nieporęt (2)     | 10 052 | 10 052 | 10 052 | 10 052 | 10 052 | 10 052 | 10 052 | 10 052 | 10 052 | 10 052 | 10 012 | 10 012 | 9 563  | 9 563  | 9 563  |
| 1408043 | Serock (3)       | 10 808 | 10 808 | 10 808 | 10 808 | 10 808 | 10 808 | 10 896 | 10 896 | 10 896 | 10 896 | 10 942 | 11 029 | 11 029 | 11 029 | 11 029 |
| 1408052 | Wieliszew (2) *  | 10 603 | 10 603 | 10 603 | 10 603 | 10 603 | 10 603 | 10 223 | 10 223 | 10 223 | 10 223 | 10 160 | 10 160 | 10 609 | 10 609 | 10 609 |
| 1412011 | Mińsk Mazowiec   | 1 312  | 1 312  | 1 312  | 1 312  | 1 312  | 1 312  | 1 312  | 1 312  | 1 312  | 1 312  | 1 318  | 1 318  | 1 318  | 1 318  | 1 318  |
| 1412042 | Ceglów (2)       | 9 574  | 9 574  | 9 574  | 9 574  | 9 574  | 9 574  | 9 574  | 9 574  | 9 574  | 9 574  | 9 563  | 9 563  | 9 563  | 9 563  | 9 563  |
| 1412052 | Dębe Wielkie (2) | 7 788  | 7 788  | 7 788  | 7 788  | 7 788  | 7 788  | 7 788  | 7 788  | 7 788  | 7 788  | 7 772  | 7 772  | 7 772  | 7 772  | 7 772  |
| 1412062 | Dobre (2)        | 12 485 | 12 485 | 12 485 | 12 485 | 12 485 | 12 485 | 12 485 | 12 485 | 12 485 | 12 485 | 12 486 | 12 486 | 12 486 | 12 490 | 12 490 |
| 1412073 | Halinów (3) *    | 6 309  | 6 309  | 6 309  | 6 309  | 6 309  | 6 309  | 6 309  | 6 309  | 6 309  | 6 309  | 6 309  | 6 309  | 6 309  | 6 309  | 6 309  |
| 1412082 | Jakubów (2)      | 8 723  | 8 723  | 8 723  | 8 723  | 8 723  | 8 723  | 8 723  | 8 723  | 8 723  | 8 723  | 8 698  | 8 698  | 8 698  | 8 698  | 8 698  |
| 1412093 | Kałużyn (3)      | 9 452  | 9 452  | 9 452  | 9 452  | 9 452  | 9 452  | 9 452  | 9 452  | 9 452  | 9 452  | 9 441  | 9 441  | 9 441  | 9 439  | 9 439  |
| 1412102 | Latowicz (2)     | 11 415 | 11 415 | 11 415 | 11 415 | 11 415 | 11 415 | 11 415 | 11 415 | 11 415 | 11 415 | 11 403 | 11 403 | 11 403 | 11 405 | 11 405 |
| 1412112 | Mińsk Mazowiec   | 11 228 | 11 228 | 11 228 | 11 228 | 11 228 | 11 228 | 11 228 | 11 228 | 11 228 | 11 228 | 11 176 | 11 176 | 11 176 | 11 231 | 11 231 |
| 1412122 | Mrozy (2)        | 14 524 | 14 524 | 14 524 | 14 524 | 14 524 | 14 524 | 14 524 | 14 524 | 14 524 | 14 524 | 14 492 | 14 492 | 14 492 | 14 492 | 14 492 |
| 1412132 | Siennica (2)     | 11 073 | 11 073 | 11 073 | 11 073 | 11 073 | 11 073 | 11 073 | 11 073 | 11 073 | 11 073 | 11 087 | 11 087 | 11 087 | 11 087 | 11 087 |
| 1412142 | Stanisławów (2)  | 10 601 | 10 601 | 10 601 | 10 601 | 10 601 | 10 601 | 10 601 | 10 601 | 10 601 | 10 601 | 10 697 | 10 697 | 10 697 | 10 637 | 10 637 |
| 1412151 | Sulejówek (1) *  | 1 951  | 1 951  | 1 951  | 1 951  | 1 951  | 1 951  | 1 951  | 1 951  | 1 951  | 1 951  | 1 931  | 1 931  | 1 931  | 1 931  | 1 931  |
| 1414011 | Nowy Dwór Maz    | 2 447  | 2 447  | 2 447  | 2 447  | 2 447  | 2 447  | 2 827  | 2 827  | 2 827  | 2 827  | 2 823  | 2 823  | 2 821  | 2 821  | 2 821  |
| 1414022 | Czosnów (2)      | 12 834 | 12 834 | 12 834 | 12 834 | 12 834 | 12 834 | 12 834 | 12 834 | 12 834 | 12 834 | 12 845 | 12 845 | 12 845 | 12 845 | 12 845 |
| 1414032 | Leoncin (2)      | 15 884 | 15 884 | 15 884 | 15 884 | 15 884 | 15 884 | 15 884 | 15 884 | 15 884 | 15 884 | 15 798 | 15 798 | 15 798 | 15 798 | 15 798 |
| 1414052 | Pomiechówek (2)  | 10 231 | 10 231 | 10 231 | 10 231 | 10 231 | 10 231 | 10 231 | 10 231 | 10 231 | 10 231 | 10 266 | 10 266 | 10 268 | 10 268 | 10 268 |
| 1414063 | Zakroczym (3)    | 7 142  | 7 142  | 7 142  | 7 142  | 7 142  | 7 142  | 7 142  | 7 142  | 7 142  | 7 142  | 7 170  | 7 170  | 7 170  | 7 170  | 7 170  |
| 1417011 | Józefów (1)      | 2 389  | 2 389  | 2 389  | 2 389  | 2 389  | 2 392  | 2 392  | 2 392  | 2 392  | 2 392  | 2 391  | 2 391  | 2 391  | 2 391  | 2 391  |
| 1417021 | Otwock (1)       | 4 734  | 4 734  | 4 734  | 4 734  | 4 734  | 4 733  | 4 733  | 4 733  | 4 733  | 4 733  | 4 731  | 4 731  | 4 731  | 4 731  | 4 731  |
| 1417032 | Celestynów (2)   | 8 060  | 8 060  | 8 060  | 8 060  | 8 956  | 8 892  | 8 892  | 8 892  | 8 892  | 8 892  | 8 892  | 8 892  | 8 892  | 8 892  | 8 892  |
| 1417043 | Karczew (3)      | 8 156  | 8 156  | 8 156  | 8 156  | 8 156  | 8 149  | 8 149  | 8 149  | 8 149  | 8 149  | 8 150  | 8 150  | 8 150  | 8 150  | 8 150  |
| 1417052 | Kołbiel (2)      | 10 619 | 10 619 | 10 619 | 10 619 | 10 619 | 10 644 | 10 644 | 10 644 | 10 644 | 10 644 | 10 705 | 10 705 | 10 704 | 10 650 | 10 650 |
| 1417082 | Wiązowna (2)     | 10 215 | 10 215 | 10 215 | 10 215 | 10 215 | 10 212 | 10 212 | 10 212 | 10 212 | 10 212 | 10 212 | 10 212 | 10 212 | 10 212 | 10 212 |
| 1418013 | Góra Kalwaria (  | 14 511 | 14 511 | 14 511 | 14 511 | 14 511 | 14 511 | 14 511 | 14 511 | 14 511 | 14 511 | 14 412 | 14 412 | 14 412 | 14 412 | 14 412 |
| 1418023 | Konstancin-Jezi  | 7 828  | 7 828  | 7 828  | 7 828  | 7 828  | 7 828  | 7 828  | 7 828  | 7 828  | 7 828  | 7 858  | 7 858  | 7 858  | 7 858  | 7 858  |
| 1418032 | Lesznowola (2)   | 6 917  | 6 917  | 6 917  | 6 917  | 6 917  | 6 917  | 6 917  | 6 917  | 6 917  | 6 917  | 6 930  | 6 930  | 6 930  | 6 930  | 6 930  |
| 1418043 | Piasечно (3)     | 12 822 | 12 822 | 12 822 | 12 822 | 12 822 | 12 822 | 12 822 | 12 822 | 12 822 | 12 822 | 12 826 | 12 826 | 12 826 | 12 826 | 12 826 |
| 1418052 | Prażmów (2)      | 8 611  | 8 611  | 8 611  | 8 611  | 8 611  | 8 611  | 8 611  | 8 611  | 8 611  | 8 611  | 8 647  | 8 647  | 8 647  | 8 647  | 8 647  |
| 1418063 | Tarczyn (3) *    | 11 415 | 11 415 | 11 415 | 11 415 | 11 415 | 11 415 | 11 415 | 11 415 | 11 415 | 11 415 | 11 427 | 11 427 | 11 427 | 11 427 | 11 427 |
| 1421011 | Piastów (1)      | 583    | 583    | 583    | 583    | 583    | 583    | 583    | 583    | 583    | 583    | 576    | 576    | 576    | 576    | 576    |
| 1421021 | Pruszków (1)     | 1 915  | 1 915  | 1 915  | 1 915  | 1 915  | 1 915  | 1 915  | 1 915  | 1 915  | 1 915  | 1 919  | 1 919  | 1 919  | 1 919  | 1 919  |
| 1421033 | Brwinów (3)      | 6 916  | 6 916  | 6 916  | 6 916  | 6 916  | 6 916  | 6 916  | 6 916  | 6 916  | 6 916  | 6 926  | 6 926  | 6 926  | 6 926  | 6 926  |

|         |                   |        |        |        |        |        |        |        |        |        |        |        |        |        |        |        |
|---------|-------------------|--------|--------|--------|--------|--------|--------|--------|--------|--------|--------|--------|--------|--------|--------|--------|
| 1421042 | Michałowice (2)   | 5 127  | 5 127  | 5 127  | 5 127  | 5 127  | 5 127  | 5 127  | 5 127  | 5 127  | 5 127  | 5 113  | 5 113  | 5 113  | 5 113  | 5 113  |
| 1421052 | Nadarzyn (2)      | 7 340  | 7 340  | 7 340  | 7 340  | 7 340  | 7 340  | 7 340  | 7 340  | 7 340  | 7 340  | 7 345  | 7 345  | 7 345  | 7 345  | 7 345  |
| 1421062 | Raszyn (2)        | 4 389  | 4 389  | 4 389  | 4 389  | 4 389  | 4 389  | 4 389  | 4 389  | 4 389  | 4 389  | 4 391  | 4 391  | 4 391  | 4 391  | 4 391  |
| 1428011 | Sochaczew (1)     | 2 613  | 2 613  | 2 613  | 2 613  | 2 613  | 2 613  | 2 613  | 2 613  | 2 613  | 2 613  | 2 618  | 2 618  | 2 619  | 2 619  | 2 619  |
| 1428022 | Brochów (2) *     | 11 676 | 11 676 | 11 676 | 11 676 | 11 676 | 11 676 | 11 676 | 11 676 | 11 676 | 11 676 | 11 982 | 11 982 | 11 981 | 11 981 | 11 981 |
| 1428052 | Nowa Sucha (2)    | 9 034  | 9 034  | 9 034  | 9 034  | 9 034  | 9 034  | 9 034  | 9 034  | 9 034  | 9 034  | 9 015  | 9 015  | 9 015  | 9 015  | 9 015  |
| 1428072 | Sochaczew (2)     | 9 141  | 9 141  | 9 141  | 9 141  | 9 141  | 9 141  | 9 141  | 9 141  | 9 141  | 9 141  | 9 138  | 9 138  | 9 138  | 9 138  | 9 138  |
| 1428082 | Teresin (2)       | 8 798  | 8 798  | 8 798  | 8 798  | 8 798  | 8 798  | 8 798  | 8 798  | 8 798  | 8 798  | 8 754  | 8 754  | 8 796  | 8 796  | 8 796  |
| 1432013 | Błonie (3)        | 8 584  | 8 584  | 8 584  | 8 584  | 8 584  | 8 584  | 8 584  | 8 584  | 8 584  | 8 584  | 8 558  | 8 558  | 8 558  | 8 558  | 8 558  |
| 1432022 | Izabelin (2)      | 4 885  | 4 885  | 4 885  | 4 885  | 6 498  | 6 498  | 6 498  | 6 498  | 6 498  | 6 498  | 6 855  | 6 855  | 6 501  | 6 501  | 6 501  |
| 1432032 | Kampinos (2)      | 8 425  | 8 425  | 8 425  | 8 425  | 8 425  | 8 425  | 8 425  | 8 425  | 8 425  | 8 425  | 8 504  | 8 504  | 8 460  | 8 460  | 8 460  |
| 1432042 | Leszno (2)        | 12 503 | 12 503 | 12 503 | 12 503 | 12 503 | 12 503 | 12 503 | 12 503 | 12 503 | 12 503 | 12 509 | 12 509 | 12 508 | 12 508 | 12 508 |
| 1432053 | Łomianki (3)      | 3 806  | 3 806  | 3 806  | 3 806  | 3 806  | 3 806  | 3 806  | 3 806  | 3 806  | 3 806  | 3 883  | 3 883  | 3 883  | 3 883  | 3 883  |
| 1432063 | Ożarów Mazow      | 7 134  | 7 134  | 7 134  | 7 134  | 7 134  | 7 134  | 7 134  | 7 134  | 7 134  | 7 134  | 7 127  | 7 127  | 7 127  | 7 127  | 7 127  |
| 1432072 | Stare Babice (2)  | 7 962  | 7 962  | 7 962  | 7 962  | 6 349  | 6 349  | 6 349  | 6 349  | 6 349  | 6 349  | 5 985  | 5 985  | 6 342  | 6 342  | 6 342  |
| 1434011 | Kobyłka (1)       | 2 005  | 2 005  | 2 005  | 2 005  | 2 005  | 2 005  | 2 005  | 2 005  | 2 005  | 2 005  | 1 964  | 1 964  | 1 964  | 1 964  | 1 964  |
| 1434021 | Marki (1)         | 2 603  | 2 601  | 2 601  | 2 601  | 2 601  | 2 601  | 2 601  | 2 601  | 2 601  | 2 601  | 2 615  | 2 615  | 2 615  | 2 615  | 2 615  |
| 1434031 | Ząbki (1)         | 1 113  | 1 113  | 1 113  | 1 113  | 1 113  | 1 113  | 1 113  | 1 113  | 1 113  | 1 113  | 1 100  | 1 100  | 1 098  | 1 098  | 1 098  |
| 1434041 | Zielonka (1)      | 7 921  | 7 923  | 7 923  | 7 923  | 7 923  | 7 923  | 7 923  | 7 923  | 7 923  | 7 923  | 7 948  | 7 948  | 7 948  | 7 948  | 7 948  |
| 1434052 | Dąbrówka (2)      | 10 905 | 10 905 | 10 905 | 10 905 | 10 905 | 10 905 | 10 905 | 10 905 | 10 905 | 10 905 | 10 922 | 10 922 | 10 922 | 10 922 | 10 922 |
| 1434072 | Klembów (2)       | 8 579  | 8 579  | 8 579  | 8 579  | 8 579  | 8 579  | 8 579  | 8 579  | 8 579  | 8 579  | 8 570  | 8 570  | 8 570  | 8 570  | 8 570  |
| 1434082 | Poświętne (2)     | 10 626 | 10 626 | 10 626 | 10 626 | 10 626 | 10 626 | 10 626 | 10 626 | 10 626 | 10 425 | 10 395 | 10 395 | 10 395 | 10 395 | 10 395 |
| 1434093 | Radzymin (3)      | 13 093 | 13 093 | 13 093 | 13 093 | 13 093 | 13 093 | 13 093 | 13 093 | 13 093 | 13 093 | 12 987 | 12 987 | 12 987 | 12 987 | 12 987 |
| 1434113 | Tłuszcz (3)       | 10 283 | 10 283 | 10 283 | 10 283 | 10 283 | 10 283 | 10 283 | 10 283 | 10 283 | 10 283 | 10 301 | 10 301 | 10 301 | 10 301 | 10 301 |
| 1434123 | Wołomin (3)       | 5 952  | 5 952  | 5 952  | 5 952  | 5 952  | 5 952  | 5 952  | 5 952  | 5 952  | 6 153  | 6 166  | 6 166  | 6 166  | 6 166  | 6 166  |
| 1435042 | Somianka (2)      | 11 638 | 11 638 | 11 638 | 11 638 | 11 638 | 11 638 | 11 638 | 11 638 | 11 638 | 11 638 | 11 652 | 11 722 | 11 768 | 11 768 | 11 769 |
| 1435053 | Wyszków (3)       | 16 560 | 16 560 | 16 560 | 16 560 | 16 560 | 16 560 | 16 560 | 16 560 | 16 560 | 16 560 | 16 546 | 16 367 | 16 367 | 16 367 | 16 517 |
| 1435062 | Zabrodzie (2)     | 9 203  | 9 203  | 9 203  | 9 203  | 9 203  | 9 203  | 9 203  | 9 203  | 9 203  | 9 203  | 9 202  | 9 202  | 9 202  | 9 202  | 9 200  |
| 1438011 | Żyrardów (1)      | 1 433  | 1 433  | 1 433  | 1 433  | 1 435  | 1 435  | 1 435  | 1 435  | 1 435  | 1 435  | 1 435  | 1 435  | 1 435  | 1 435  | 1 435  |
| 1438023 | Mszczonów (3)     | 14 487 | 14 487 | 14 487 | 14 487 | 14 487 | 14 487 | 14 487 | 14 487 | 14 487 | 14 487 | 15 192 | 15 188 | 15 188 | 15 186 | 15 185 |
| 1438032 | Puszcza Mariań    | 14 241 | 14 241 | 14 241 | 14 241 | 14 241 | 14 241 | 14 241 | 14 241 | 14 241 | 14 241 | 14 318 | 14 318 | 14 318 | 14 318 | 14 318 |
| 1438042 | Radziejowice (2)  | 8 006  | 8 006  | 8 006  | 8 006  | 8 006  | 8 006  | 8 006  | 8 006  | 8 006  | 8 006  | 7 301  | 7 307  | 7 307  | 7 307  | 7 301  |
| 1438052 | Wisłucki (2)      | 15 096 | 15 096 | 15 096 | 15 096 | 15 094 | 15 094 | 15 094 | 15 094 | 15 094 | 15 094 | 15 015 | 15 015 | 15 015 | 15 015 | 15 015 |
| 1465011 | M.st.Warszawa     | 49 428 | 49 428 | 49 428 | 49 428 | 49 428 | 49 428 | 51 690 | 51 690 | 51 690 | 51 690 | 51 722 | 51 722 | 51 724 | 51 724 | 51 724 |
| 2204011 | Pruszcz Gdańsk    | 1 647  | 1 647  | 1 647  | 1 647  | 1 647  | 1 647  | 1 647  | 1 647  | 1 647  | 1 647  | 1 647  | 1 647  | 1 647  | 1 647  | 1 647  |
| 2204022 | Cedry Wielkie (2) | 12 428 | 12 428 | 12 428 | 12 428 | 12 428 | 12 428 | 12 428 | 12 428 | 12 428 | 12 428 | 12 427 | 12 427 | 12 427 | 12 427 | 12 427 |
| 2204032 | Kolbudy (2) *     | 8 280  | 8 280  | 8 280  | 8 280  | 8 280  | 8 280  | 8 280  | 8 280  | 8 280  | 8 280  | 8 286  | 8 266  | 8 266  | 8 266  | 8 266  |

|         |                    |        |        |        |        |        |        |        |        |        |        |        |        |        |        |        |
|---------|--------------------|--------|--------|--------|--------|--------|--------|--------|--------|--------|--------|--------|--------|--------|--------|--------|
| 2204042 | Pruszcz Gdański    | 14 256 | 14 256 | 14 256 | 14 256 | 14 256 | 14 256 | 14 256 | 14 256 | 14 256 | 14 256 | 14 360 | 14 380 | 14 380 | 14 380 | 14 380 |
| 2204052 | Przywidz (2)       | 12 962 | 12 962 | 12 962 | 12 962 | 12 962 | 12 962 | 12 962 | 12 962 | 12 962 | 12 962 | 12 934 | 12 934 | 12 934 | 12 934 | 12 934 |
| 2204062 | Pszczółki (2)      | 4 984  | 4 984  | 4 984  | 4 984  | 4 984  | 4 984  | 4 984  | 4 984  | 4 984  | 4 984  | 5 012  | 5 012  | 5 012  | 5 012  | 5 012  |
| 2204072 | Suchy Dąb (2)      | 8 498  | 8 498  | 8 498  | 8 498  | 8 498  | 8 498  | 8 498  | 8 498  | 8 498  | 8 498  | 8 451  | 8 451  | 8 451  | 8 451  | 8 451  |
| 2204082 | Trąbki Wielkie (2) | 16 262 | 16 262 | 16 262 | 16 262 | 16 262 | 16 262 | 16 262 | 16 262 | 16 262 | 16 262 | 16 258 | 16 258 | 16 258 | 16 258 | 16 258 |
| 2205012 | Chmielno (2)       | 7 918  | 7 918  | 7 918  | 7 918  | 7 918  | 7 918  | 7 918  | 7 918  | 7 918  | 7 918  | 7 861  | 7 861  | 7 861  | 7 861  | 7 861  |
| 2205023 | Kartuzy (3)        | 20 528 | 20 528 | 20 528 | 20 528 | 20 528 | 20 528 | 20 528 | 20 528 | 20 528 | 20 528 | 20 646 | 20 645 | 20 645 | 20 645 | 20 645 |
| 2205032 | Przodkowo (2)      | 8 539  | 8 539  | 8 539  | 8 539  | 8 539  | 8 539  | 8 539  | 8 539  | 8 539  | 8 539  | 8 518  | 8 518  | 8 518  | 8 518  | 8 518  |
| 2205042 | Sierakowice (2)    | 18 236 | 18 236 | 18 236 | 18 236 | 18 236 | 18 236 | 18 236 | 18 236 | 18 236 | 18 236 | 18 222 | 18 222 | 18 222 | 18 222 | 18 222 |
| 2205052 | Somonino (2)       | 11 227 | 11 227 | 11 227 | 11 227 | 11 227 | 11 227 | 11 227 | 11 227 | 11 227 | 11 227 | 11 211 | 11 211 | 11 211 | 11 211 | 11 211 |
| 2205062 | Stężycza (2)       | 16 030 | 16 030 | 16 030 | 16 030 | 16 030 | 16 030 | 16 030 | 16 030 | 16 030 | 16 030 | 16 047 | 16 047 | 16 047 | 16 047 | 16 047 |
| 2205072 | Sulęczyño (2)      | 13 131 | 13 131 | 13 131 | 13 131 | 13 131 | 13 131 | 13 131 | 13 131 | 13 131 | 13 131 | 13 146 | 13 146 | 13 146 | 13 146 | 13 146 |
| 2205083 | Żukowo (3)         | 16 395 | 16 395 | 16 395 | 16 395 | 16 395 | 16 395 | 16 395 | 16 395 | 16 395 | 16 395 | 16 403 | 16 404 | 16 404 | 16 404 | 16 404 |
| 2208011 | Lębork (1)         | 1 786  | 1 786  | 1 786  | 1 786  | 1 786  | 1 786  | 1 786  | 1 786  | 1 786  | 1 786  | 1 786  | 1 786  | 1 786  | 1 786  | 1 786  |
| 2208021 | Łeba (1)           | 1 480  | 1 480  | 1 480  | 1 480  | 1 480  | 1 480  | 1 480  | 1 480  | 1 480  | 1 480  | 1 480  | 1 480  | 1 480  | 1 481  | 1 481  |
| 2208032 | Cewice (2)         | 18 786 | 18 786 | 18 786 | 18 786 | 18 786 | 18 786 | 18 786 | 18 786 | 18 786 | 18 786 | 18 761 | 18 761 | 18 761 | 18 761 | 18 761 |
| 2208042 | Nowa Wieś Lęb.     | 27 039 | 27 039 | 27 039 | 27 039 | 27 039 | 27 039 | 27 039 | 27 039 | 27 039 | 27 039 | 27 046 | 27 046 | 27 046 | 27 045 | 27 045 |
| 2208052 | Wicko (2)          | 21 608 | 21 608 | 21 608 | 21 608 | 21 608 | 21 608 | 21 608 | 21 608 | 21 608 | 21 608 | 21 529 | 21 529 | 21 529 | 21 529 | 21 529 |
| 2209011 | Malbork (1)        | 1 715  | 1 715  | 1 715  | 1 715  | 1 715  | 1 715  | 1 715  | 1 715  | 1 715  | 1 715  | 1 716  | 1 716  | 1 716  | 1 716  | 1 716  |
| 2209032 | Lichnowy (2)       | 8 870  | 8 870  | 8 870  | 8 870  | 8 870  | 8 870  | 8 870  | 8 870  | 8 870  | 8 870  | 8 891  | 8 891  | 8 891  | 8 891  | 8 891  |
| 2209042 | Malbork (2)        | 10 093 | 10 093 | 10 093 | 10 093 | 10 093 | 10 093 | 10 093 | 10 093 | 10 093 | 10 093 | 10 067 | 10 067 | 10 067 | 10 067 | 10 067 |
| 2209062 | Miłoradz (2)       | 9 375  | 9 375  | 9 375  | 9 375  | 9 375  | 9 375  | 9 375  | 9 375  | 9 375  | 9 375  | 9 370  | 9 370  | 9 370  | 9 370  | 9 370  |
| 2209073 | Nowy Staw (3)      | 11 438 | 11 438 | 11 438 | 11 438 | 11 438 | 11 438 | 11 438 | 11 438 | 11 438 | 11 438 | 11 430 | 11 430 | 11 430 | 11 430 | 11 430 |
| 2209082 | Stare Pole (2)     | 7 972  | 7 972  | 7 972  | 7 972  | 7 972  | 7 972  | 7 972  | 7 972  | 7 972  | 7 972  | 7 949  | 7 949  | 7 949  | 7 949  | 7 949  |
| 2210011 | Krynica Morska     | 10 204 | 10 204 | 10 204 | 10 204 | 10 204 | 10 204 | 10 204 | 10 204 | 10 204 | 10 204 | 11 615 | 11 615 | 11 601 | 11 601 | 11 601 |
| 2210023 | Nowy Dwór Gdański  | 21 300 | 21 300 | 21 300 | 21 300 | 21 300 | 21 300 | 21 300 | 21 300 | 21 300 | 21 300 | 21 320 | 21 320 | 21 320 | 21 320 | 21 320 |
| 2210032 | Ostaszewo (2)      | 6 065  | 6 065  | 6 065  | 6 065  | 6 065  | 6 065  | 6 065  | 6 065  | 6 065  | 6 065  | 6 070  | 6 070  | 6 070  | 6 070  | 6 070  |
| 2210042 | Stegna (2)         | 16 957 | 16 957 | 16 957 | 16 957 | 16 957 | 16 957 | 16 957 | 16 957 | 16 957 | 16 957 | 17 008 | 17 008 | 17 009 | 17 009 | 17 009 |
| 2210052 | Sztutowo (2)       | 10 749 | 10 749 | 10 749 | 10 749 | 10 749 | 10 749 | 10 749 | 10 749 | 10 749 | 10 749 | 11 154 | 11 154 | 11 153 | 11 153 | 11 153 |
| 2211011 | Hel (1)            | 2 127  | 2 127  | 2 127  | 2 127  | 2 127  | 2 127  | 2 127  | 2 127  | 2 127  | 2 127  | 2 172  | 2 172  | 2 172  | 2 172  | 2 172  |
| 2211031 | Puck (1)           | 490    | 490    | 490    | 490    | 490    | 490    | 490    | 490    | 490    | 490    | 479    | 479    | 479    | 479    | 479    |
| 2211041 | Władysławowo       | 3 841  | 3 841  | 3 841  | 3 841  | 3 841  | 3 841  | 3 841  | 3 841  | 3 841  | 3 841  | 3 922  | 3 922  | 3 922  | 3 922  | 3 922  |
| 2211052 | Kosakowo (2)       | 5 015  | 5 015  | 5 015  | 5 015  | 5 015  | 4 737  | 4 737  | 5 015  | 5 015  | 5 015  | 5 014  | 5 014  | 5 014  | 5 014  | 5 014  |
| 2211062 | Krokowa (2)        | 21 200 | 21 183 | 21 183 | 21 183 | 21 183 | 21 183 | 21 183 | 21 183 | 21 183 | 21 183 | 21 109 | 21 109 | 21 109 | 21 109 | 21 109 |
| 2211072 | Puck (2)           | 24 618 | 24 635 | 24 329 | 24 329 | 24 329 | 24 329 | 24 329 | 24 329 | 24 329 | 24 329 | 24 273 | 24 273 | 24 273 | 24 273 | 23 738 |
| 2214011 | Tczew (1)          | 2 226  | 2 226  | 2 226  | 2 226  | 2 226  | 2 226  | 2 226  | 2 226  | 2 226  | 2 226  | 2 239  | 2 239  | 2 239  | 2 238  | 2 238  |
| 2214023 | Gniew (3)          | 19 478 | 19 478 | 19 478 | 19 478 | 19 478 | 19 478 | 19 478 | 19 478 | 19 478 | 19 478 | 19 411 | 19 412 | 19 412 | 19 412 | 19 412 |

|         |                 |        |        |        |        |        |        |        |        |        |        |        |        |        |        |        |
|---------|-----------------|--------|--------|--------|--------|--------|--------|--------|--------|--------|--------|--------|--------|--------|--------|--------|
| 2214032 | Morzeszczyn (2) | 9 122  | 9 122  | 9 122  | 9 122  | 9 122  | 9 122  | 9 122  | 9 122  | 9 122  | 9 122  | 9 119  | 9 119  | 9 119  | 9 119  | 9 119  |
| 2214043 | Pelplin (3)     | 14 045 | 14 045 | 14 045 | 14 045 | 14 045 | 14 045 | 14 045 | 14 045 | 14 045 | 14 045 | 14 102 | 14 102 | 14 102 | 14 102 | 14 102 |
| 2214052 | Subkowy (2)     | 7 822  | 7 822  | 7 822  | 7 822  | 7 822  | 7 822  | 7 822  | 7 822  | 7 822  | 7 822  | 7 780  | 7 780  | 7 780  | 7 780  | 7 780  |
| 2214062 | Tczew (2)       | 17 061 | 17 061 | 17 061 | 17 061 | 17 061 | 17 061 | 17 061 | 17 061 | 17 061 | 17 061 | 17 060 | 17 059 | 17 059 | 17 060 | 17 060 |
| 2215011 | Reda (1)        | 2 639  | 2 639  | 2 945  | 2 945  | 2 945  | 2 945  | 2 945  | 2 945  | 2 945  | 2 945  | 2 957  | 2 957  | 2 957  | 2 957  | 3 492  |
| 2215021 | Rumia (1)       | 3 008  | 3 008  | 3 008  | 3 008  | 3 008  | 3 286  | 3 286  | 3 008  | 3 008  | 3 008  | 3 009  | 3 009  | 3 009  | 3 009  | 3 010  |
| 2215031 | Wejherowo (1)   | 2 565  | 2 565  | 2 565  | 2 565  | 2 565  | 2 565  | 2 565  | 2 565  | 2 565  | 2 565  | 2 553  | 2 553  | 2 553  | 2 553  | 2 553  |
| 2215042 | Choczewo (2)    | 18 323 | 18 323 | 18 323 | 18 323 | 18 323 | 18 323 | 18 323 | 18 323 | 18 323 | 18 323 | 18 313 | 18 313 | 18 313 | 18 313 | 18 313 |
| 2215052 | Gniewino (2)    | 17 621 | 17 621 | 17 621 | 17 621 | 17 621 | 17 621 | 17 621 | 17 621 | 17 621 | 17 621 | 17 627 | 17 627 | 17 627 | 17 627 | 17 627 |
| 2215062 | Linia (2)       | 11 982 | 11 982 | 11 982 | 11 982 | 11 982 | 11 982 | 11 982 | 11 982 | 11 982 | 11 982 | 11 981 | 11 981 | 11 981 | 11 981 | 11 981 |
| 2215072 | Luzino (2)      | 11 194 | 11 194 | 11 194 | 11 194 | 11 194 | 11 194 | 11 194 | 11 194 | 11 194 | 11 194 | 11 147 | 11 147 | 11 147 | 11 147 | 11 147 |
| 2215082 | Łęczyce (2)     | 23 281 | 23 281 | 23 281 | 23 281 | 23 281 | 23 281 | 23 281 | 23 281 | 23 281 | 23 281 | 23 286 | 23 286 | 23 286 | 23 286 | 23 286 |
| 2215092 | Szemud (2)      | 17 657 | 17 657 | 17 657 | 17 657 | 17 657 | 17 657 | 17 657 | 17 657 | 17 657 | 17 657 | 17 691 | 17 691 | 17 691 | 17 691 | 17 691 |
| 2215102 | Wejherowo (2)   | 19 408 | 19 408 | 19 408 | 19 408 | 19 408 | 19 408 | 19 408 | 19 408 | 19 408 | 19 408 | 19 426 | 19 426 | 19 426 | 19 426 | 19 425 |
| 2261011 | Gdańsk (1)      | 26 203 | 26 203 | 26 203 | 26 203 | 26 203 | 26 203 | 26 203 | 26 203 | 26 203 | 26 203 | 26 550 | 26 162 | 26 162 | 26 168 | 26 196 |
| 2262011 | Gdynia (1)      | 13 549 | 13 549 | 13 549 | 13 549 | 13 549 | 13 549 | 13 549 | 13 549 | 13 549 | 13 549 | 13 514 | 13 514 | 13 514 | 13 514 | 13 514 |
| 2264011 | Sopot (1)       | 1 731  | 1 731  | 1 731  | 1 731  | 1 731  | 1 731  | 1 731  | 1 731  | 1 731  | 1 731  | 1 735  | 1 734  | 1 734  | 1 728  | 1 728  |
| 3003011 | Gnieszno (1)    | 4 089  | 4 089  | 4 089  | 4 089  | 4 089  | 4 089  | 4 089  | 4 089  | 4 089  | 4 089  | 4 060  | 4 060  | 4 060  | 4 060  | 4 060  |
| 3003023 | Czerniejewo (3) | 11 201 | 11 201 | 11 201 | 11 201 | 11 201 | 11 201 | 11 201 | 11 201 | 11 201 | 11 201 | 11 194 | 11 194 | 11 194 | 11 194 | 11 194 |
| 3003032 | Gnieszno (2)    | 17 799 | 17 799 | 17 799 | 17 799 | 17 799 | 17 799 | 17 799 | 17 799 | 17 799 | 17 799 | 17 816 | 17 816 | 17 816 | 17 816 | 17 816 |
| 3003042 | Kiszkowo (2)    | 11 458 | 11 458 | 11 458 | 11 458 | 11 458 | 11 458 | 11 458 | 11 458 | 11 458 | 11 458 | 11 449 | 11 449 | 11 449 | 11 449 | 11 449 |
| 3003062 | Łubowo (2)      | 11 341 | 11 341 | 11 341 | 11 341 | 11 341 | 11 341 | 11 341 | 11 341 | 11 341 | 11 341 | 11 354 | 11 354 | 11 354 | 11 354 | 11 354 |
| 3005012 | Granowo (2)     | 6 688  | 6 688  | 6 842  | 6 842  | 6 842  | 6 842  | 6 842  | 6 842  | 6 842  | 6 842  | 6 687  | 6 687  | 6 687  | 6 687  | 6 687  |
| 3005023 | Grodzisk Wielki | 13 449 | 13 449 | 13 449 | 13 449 | 13 449 | 13 449 | 13 449 | 13 449 | 13 449 | 13 449 | 13 259 | 13 259 | 13 259 | 13 259 | 13 259 |
| 3011011 | Kościan (1)     | 875    | 875    | 875    | 875    | 875    | 875    | 875    | 875    | 875    | 875    | 879    | 879    | 879    | 879    | 879    |
| 3011023 | Czempiń (3)     | 14 246 | 14 246 | 14 246 | 14 246 | 14 246 | 14 246 | 14 246 | 14 246 | 14 246 | 14 246 | 14 219 | 14 219 | 14 219 | 14 219 | 14 219 |
| 3011032 | Kościan (2)     | 20 227 | 20 227 | 20 227 | 20 227 | 20 227 | 20 227 | 20 227 | 20 227 | 20 227 | 20 227 | 20 272 | 20 272 | 20 272 | 20 272 | 20 272 |
| 3015043 | Nowy Tomyśl (3) | 18 589 | 18 589 | 18 589 | 18 589 | 18 589 | 18 589 | 18 589 | 18 589 | 18 589 | 18 589 | 18 645 | 18 645 | 18 645 | 18 645 | 18 645 |
| 3015053 | Opalenica (3)   | 14 769 | 14 769 | 14 769 | 14 769 | 14 769 | 14 769 | 14 769 | 14 769 | 14 769 | 14 769 | 14 891 | 14 891 | 14 891 | 14 891 | 14 891 |
| 3016013 | Oborniki (3)    | 34 016 | 34 016 | 34 016 | 34 016 | 34 016 | 34 016 | 34 016 | 34 016 | 34 016 | 34 016 | 34 004 | 34 004 | 34 004 | 34 004 | 34 004 |
| 3016023 | Rogoźno (3)     | 21 795 | 21 795 | 21 795 | 21 795 | 21 795 | 21 795 | 21 795 | 21 795 | 21 795 | 21 795 | 21 624 | 21 624 | 21 624 | 21 624 | 21 624 |
| 3021011 | Luboń (1)       | 1 352  | 1 352  | 1 352  | 1 352  | 1 352  | 1 352  | 1 352  | 1 352  | 1 352  | 1 352  | 1 351  | 1 351  | 1 351  | 1 351  | 1 351  |
| 3021021 | Puszczykowo (1) | 1 665  | 1 665  | 1 665  | 1 665  | 1 665  | 1 665  | 1 665  | 1 665  | 1 665  | 1 665  | 1 611  | 1 611  | 1 611  | 1 611  | 1 611  |
| 3021033 | Buk (3)         | 9 032  | 9 032  | 9 032  | 9 032  | 9 032  | 9 032  | 9 032  | 9 032  | 9 032  | 9 032  | 9 058  | 9 058  | 9 058  | 9 058  | 9 058  |
| 3021042 | Czerwonak (2)   | 8 224  | 8 224  | 8 224  | 8 224  | 8 224  | 8 224  | 8 224  | 8 224  | 8 224  | 8 224  | 8 248  | 8 248  | 8 248  | 8 248  | 8 248  |
| 3021052 | Dopiewo (2)     | 10 808 | 10 808 | 10 808 | 10 808 | 10 808 | 10 808 | 10 808 | 10 808 | 10 808 | 10 808 | 10 802 | 10 802 | 10 802 | 10 802 | 10 802 |
| 3021062 | Kleszczewo (2)  | 7 477  | 7 477  | 7 477  | 7 477  | 7 477  | 7 477  | 7 477  | 7 477  | 7 477  | 7 477  | 7 446  | 7 446  | 7 446  | 7 446  | 7 446  |

|         |                 |        |        |        |        |        |        |        |        |        |        |        |        |        |        |        |
|---------|-----------------|--------|--------|--------|--------|--------|--------|--------|--------|--------|--------|--------|--------|--------|--------|--------|
| 3021072 | Komorniki (2)   | 6 655  | 6 655  | 6 655  | 6 655  | 6 655  | 6 655  | 6 655  | 6 655  | 6 655  | 6 655  | 6 641  | 6 641  | 6 641  | 6 641  | 6 641  |
| 3021083 | Kostrzyn (3)    | 15 421 | 15 421 | 15 421 | 15 421 | 15 421 | 15 421 | 15 421 | 15 421 | 15 421 | 15 421 | 15 481 | 15 481 | 15 481 | 15 481 | 15 481 |
| 3021093 | Kórnik (3)      | 18 658 | 18 658 | 18 658 | 18 658 | 18 658 | 18 658 | 18 658 | 18 658 | 18 658 | 18 658 | 18 613 | 18 613 | 18 613 | 18 613 | 18 613 |
| 3021103 | Mosina (3)      | 17 087 | 17 087 | 17 087 | 17 087 | 17 087 | 17 087 | 17 087 | 17 087 | 17 087 | 17 087 | 17 177 | 17 177 | 17 177 | 17 177 | 17 177 |
| 3021113 | Murowana Gośl   | 17 208 | 17 208 | 17 208 | 17 208 | 17 208 | 17 208 | 17 208 | 17 208 | 17 208 | 17 208 | 17 223 | 17 223 | 17 223 | 17 223 | 17 223 |
| 3021123 | Pobiedziska (3) | 18 927 | 18 927 | 18 927 | 18 927 | 18 927 | 18 927 | 18 927 | 18 927 | 18 927 | 18 927 | 18 926 | 18 926 | 18 926 | 18 926 | 18 926 |
| 3021132 | Rokietnica (2)  | 7 931  | 7 931  | 7 931  | 7 931  | 7 931  | 7 931  | 7 931  | 7 931  | 7 931  | 7 931  | 7 930  | 7 930  | 7 930  | 7 930  | 7 930  |
| 3021143 | Stęszew (3)     | 17 522 | 17 522 | 17 522 | 17 522 | 17 522 | 17 522 | 17 522 | 17 522 | 17 522 | 17 522 | 17 503 | 17 503 | 17 503 | 17 503 | 17 503 |
| 3021152 | Suchy Las (2)   | 11 655 | 11 655 | 11 655 | 11 655 | 11 655 | 11 655 | 11 655 | 11 655 | 11 655 | 11 655 | 11 601 | 11 601 | 11 601 | 11 601 | 11 601 |
| 3021163 | Swarzędz (3)    | 10 199 | 10 199 | 10 199 | 10 199 | 10 199 | 10 199 | 10 199 | 10 199 | 10 199 | 10 199 | 10 209 | 10 209 | 10 209 | 10 209 | 10 209 |
| 3021172 | Tarnowo Podgó   | 10 140 | 10 140 | 10 140 | 10 140 | 10 140 | 10 140 | 10 140 | 10 140 | 10 140 | 10 140 | 10 175 | 10 175 | 10 175 | 10 175 | 10 175 |
| 3024022 | Duszniki (2)    | 15 628 | 15 628 | 15 628 | 15 628 | 15 628 | 15 628 | 15 628 | 15 628 | 15 628 | 15 628 | 15 630 | 15 630 | 15 630 | 15 630 | 15 630 |
| 3024032 | Kaźmierz (2)    | 12 820 | 12 820 | 12 820 | 12 820 | 12 820 | 12 820 | 12 820 | 12 820 | 12 820 | 12 820 | 12 790 | 12 790 | 12 790 | 12 790 | 12 790 |
| 3024073 | Szamotuły (3)   | 17 507 | 17 507 | 17 507 | 17 507 | 17 507 | 17 507 | 17 507 | 17 507 | 17 507 | 17 507 | 17 552 | 17 552 | 17 552 | 17 552 | 17 552 |
| 3025012 | Dominowo (2)    | 7 932  | 7 932  | 7 932  | 7 932  | 7 932  | 7 932  | 7 932  | 7 932  | 7 932  | 7 932  | 7 936  | 7 936  | 7 936  | 7 936  | 7 936  |
| 3025043 | Środa Wielkopo  | 20 710 | 20 710 | 20 710 | 20 710 | 20 710 | 20 710 | 20 710 | 20 710 | 20 710 | 20 730 | 20 741 | 20 741 | 20 741 | 20 741 | 20 741 |
| 3025052 | Zaniemyśl (2)   | 10 676 | 10 676 | 10 676 | 10 676 | 10 676 | 10 676 | 10 676 | 10 676 | 10 676 | 10 676 | 10 655 | 10 655 | 10 655 | 10 655 | 10 655 |
| 3026012 | Brodnica (2)    | 9 586  | 9 586  | 9 586  | 9 586  | 9 586  | 9 586  | 9 586  | 9 586  | 9 586  | 9 586  | 9 583  | 9 583  | 9 583  | 9 583  | 9 583  |
| 3026043 | Śrem (3)        | 20 619 | 20 619 | 20 619 | 20 619 | 20 619 | 20 619 | 20 619 | 20 619 | 20 619 | 20 619 | 20 587 | 20 587 | 20 587 | 20 587 | 20 587 |
| 3028011 | Wągrowiec (1)   | 1 791  | 1 791  | 1 791  | 1 791  | 1 791  | 1 791  | 1 791  | 1 791  | 1 791  | 1 791  | 1 783  | 1 783  | 1 783  | 1 783  | 1 783  |
| 3028053 | Skoki (3)       | 19 852 | 19 852 | 19 852 | 19 852 | 19 852 | 19 852 | 19 852 | 19 852 | 19 852 | 19 852 | 19 849 | 19 849 | 19 849 | 19 849 | 19 849 |
| 3028072 | Wągrowiec (2)   | 34 775 | 34 775 | 34 775 | 34 775 | 34 775 | 34 775 | 34 775 | 34 775 | 34 775 | 34 775 | 34 785 | 34 785 | 34 785 | 34 785 | 34 785 |
| 3030033 | Nekla (3) *     | 9 624  | 9 624  | 9 624  | 9 624  | 9 624  | 9 624  | 9 624  | 9 624  | 9 624  | 9 624  | 9 586  | 9 586  | 9 586  | 9 586  | 9 586  |
| 3030053 | Września (3)    | 22 184 | 22 184 | 22 184 | 22 184 | 22 184 | 22 184 | 22 184 | 22 184 | 22 184 | 22 184 | 22 185 | 22 185 | 22 185 | 22 185 | 22 185 |
| 3064011 | Poznań (1)      | 26 131 | 26 131 | 26 131 | 26 131 | 26 131 | 26 131 | 26 131 | 26 131 | 26 131 | 26 131 | 26 137 | 26 185 | 26 185 | 26 185 | 26 185 |

Source: data from Poland's Central Statistical Office (GUS)
