# Supplementary material
Source: MDPI journal article supplement (https://www.mdpi.com/2071-1050/10/3/837)
Supplement: s1 [file s1]

| KOD<br>GUS | Municipality         | Share of registered unemployed people in the population of working<br>age - for 2003-2010 [%] |      |      |      |      |      |      |      | Number of people coming in<br>to work per 1 person going<br>out to work – (2006) [person] |
|------------|----------------------|-----------------------------------------------------------------------------------------------|------|------|------|------|------|------|------|-------------------------------------------------------------------------------------------|
|            |                      | 2003                                                                                          | 2004 | 2005 | 2006 | 2007 | 2008 | 2009 | 2010 |                                                                                           |
| 0214011    | Oleśnica (1)         | 13,3                                                                                          | 11,7 | 9,8  | 7,8  | 5,2  | 5,0  | 6,9  | 7,7  | 0,68                                                                                      |
| 0214032    | Dobroszyce (2)       | 16,0                                                                                          | 14,2 | 12,9 | 9,2  | 5,6  | 6,0  | 6,9  | 7,1  | 0,20                                                                                      |
| 0214062    | Oleśnica (2)         | 13,9                                                                                          | 13,5 | 12,2 | 9,3  | 6,9  | 5,6  | 7,8  | 8,4  | 0,69                                                                                      |
| 0215011    | Oława (1)            | 14,7                                                                                          | 12,3 | 10,1 | 6,5  | 4,8  | 4,8  | 7,3  | 7,4  | 1,12                                                                                      |
| 0215022    | Domaniów (2)         | 16,3                                                                                          | 14,3 | 12,6 | 8,2  | 5,1  | 4,9  | 8,0  | 8,2  | 0,18                                                                                      |
| 0215033    | Jelcz-Laskowice (3)  | 17,8                                                                                          | 13,5 | 11,1 | 7,7  | 4,6  | 5,1  | 7,6  | 6,2  | 0,89                                                                                      |
| 0215042    | Oława (2)            | 14,7                                                                                          | 12,7 | 10,5 | 7,0  | 4,6  | 4,8  | 7,1  | 8,0  | 0,16                                                                                      |
| 0217012    | Borów (2)            | 13,9                                                                                          | 13,8 | 12,3 | 10,9 | 7,3  | 5,2  | 7,0  | 5,9  | 0,15                                                                                      |
| 0218012    | Kostomłoty (2)       | 14,9                                                                                          | 13,9 | 11,3 | 9,4  | 5,9  | 5,1  | 7,1  | 7,8  | 0,09                                                                                      |
| 0218032    | Miękinia (2)         | 13,3                                                                                          | 13,3 | 10,9 | 8,0  | 5,4  | 4,1  | 6,6  | 6,3  | 1,04                                                                                      |
| 0218043    | Środa Śląska (3)     | 12,5                                                                                          | 11,9 | 10,5 | 8,4  | 5,0  | 4,8  | 7,6  | 6,8  | 1,04                                                                                      |
| 0220013    | Oborniki Śląskie (3) | 12,0                                                                                          | 10,3 | 9,4  | 6,8  | 5,3  | 3,4  | 5,0  | 5,1  | 0,55                                                                                      |
| 0220023    | Prusice (3) *        | 17,2                                                                                          | 16,2 | 15,0 | 10,4 | 6,2  | 4,6  | 7,0  | 6,5  | 0,17                                                                                      |
| 0220033    | Trzebnica (3)        | 14,3                                                                                          | 13,4 | 12,5 | 9,8  | 5,7  | 4,0  | 6,2  | 6,0  | 0,79                                                                                      |
| 0220042    | Wisznia Mała (2)     | 11,7                                                                                          | 11,4 | 10,7 | 7,9  | 5,0  | 2,8  | 4,9  | 5,1  | 0,27                                                                                      |
| 0220052    | Zawonia (2)          | 17,9                                                                                          | 17,3 | 15,4 | 12,8 | 7,5  | 5,1  | 7,7  | 7,7  | 0,17                                                                                      |
| 0222013    | Brzeg Dolny (3)      | 12,7                                                                                          | 12,2 | 10,6 | 8,3  | 7,0  | 6,2  | 9,2  | 9,2  | 0,66                                                                                      |
| 0223012    | Czernica (2)         | 10,2                                                                                          | 10,3 | 8,6  | 5,2  | 3,0  | 2,0  | 3,3  | 3,5  | 0,30                                                                                      |
| 0223022    | Długoleśka (2)       | 9,2                                                                                           | 8,6  | 7,0  | 4,6  | 2,3  | 1,9  | 3,3  | 3,3  | 0,88                                                                                      |
| 0223032    | Jordanów Śląski (2)  | 10,3                                                                                          | 10,5 | 9,3  | 5,5  | 2,5  | 1,6  | 3,0  | 3,6  | 0,07                                                                                      |
| 0223043    | Kąty Wrocławskie (3) | 13,7                                                                                          | 13,0 | 11,0 | 5,6  | 2,2  | 1,9  | 3,1  | 3,1  | 0,92                                                                                      |
| 0223052    | Kobierzyce (2)       | 9,3                                                                                           | 9,8  | 9,1  | 5,1  | 2,8  | 2,4  | 3,2  | 3,4  | 1,08                                                                                      |
| 0223062    | Mietków (2)          | 13,0                                                                                          | 12,9 | 11,2 | 6,8  | 3,0  | 2,1  | 3,3  | 4,2  | 0,28                                                                                      |
| 0223073    | Sobótka (3)          | 15,0                                                                                          | 14,4 | 13,7 | 9,3  | 4,8  | 2,9  | 4,7  | 4,2  | 0,49                                                                                      |
| 0223083    | Siechnice (3) *      | 10,2                                                                                          | 9,5  | 8,1  | 5,1  | 2,9  | 2,3  | 3,7  | 3,7  | 0,99                                                                                      |
| 0223092    | Żórawina (2)         | 11,0                                                                                          | 10,8 | 10,2 | 7,5  | 3,4  | 2,9  | 4,1  | 4,0  | 0,21                                                                                      |
| 0264011    | Wrocław (1)          | 8,7                                                                                           | 8,3  | 7,4  | 5,5  | 3,2  | 2,5  | 3,9  | 4,2  | 6,12                                                                                      |
| 0608011    | Lubartów (1)         | 14,9                                                                                          | 13,4 | 11,9 | 9,7  | 8,7  | 7,8  | 9,1  | 9,1  | 1,39                                                                                      |
| 0608072    | Lubartów (2)         | 16,5                                                                                          | 14,5 | 13,1 | 10,6 | 9,7  | 8,6  | 10,4 | 9,7  | 0,14                                                                                      |
| 0609013    | Bełżyce (3)          | 12,7                                                                                          | 11,3 | 11,2 | 10,4 | 8,7  | 7,0  | 8,4  | 9,2  | 0,57                                                                                      |
| 0609033    | Bychawa (3)          | 11,2                                                                                          | 11,3 | 10,1 | 9,2  | 7,4  | 6,8  | 8,1  | 8,5  | 0,53                                                                                      |
| 0609042    | Garbów (2)           | 8,9                                                                                           | 9,6  | 8,4  | 6,6  | 5,5  | 3,3  | 4,4  | 4,8  | 0,30                                                                                      |
| 0609052    | Głusk (2)            | 8,1                                                                                           | 7,7  | 7,1  | 5,7  | 4,1  | 2,8  | 4,5  | 4,6  | 0,46                                                                                      |
| 0609062    | Jabłonna (2)         | 8,6                                                                                           | 8,1  | 7,0  | 6,2  | 4,1  | 2,5  | 3,9  | 3,8  | 0,39                                                                                      |

|         |                       |      |      |      |     |     |     |     |      |      |
|---------|-----------------------|------|------|------|-----|-----|-----|-----|------|------|
| 0609072 | Jastków (2)           | 7,6  | 7,0  | 6,1  | 5,2 | 3,9 | 2,9 | 3,7 | 4,5  | 0,40 |
| 0609082 | Konopnica (2)         | 6,6  | 6,7  | 6,6  | 5,7 | 4,1 | 2,9 | 4,5 | 4,6  | 0,36 |
| 0609102 | Niedzwica Duża (2)    | 9,7  | 9,3  | 8,9  | 7,9 | 7,3 | 5,6 | 6,8 | 7,5  | 0,28 |
| 0609112 | Niemce (2)            | 9,1  | 8,5  | 7,9  | 6,4 | 4,9 | 3,4 | 5,0 | 5,6  | 0,54 |
| 0609122 | Strzyżewice (2)       | 9,9  | 9,3  | 8,7  | 6,8 | 5,9 | 5,1 | 6,4 | 7,3  | 0,56 |
| 0609132 | Wojciechów (2)        | 11,4 | 9,7  | 10,0 | 8,9 | 7,9 | 6,1 | 6,7 | 8,0  | 0,10 |
| 0609142 | Wólka (2)             | 8,6  | 7,2  | 6,8  | 5,9 | 4,4 | 3,0 | 3,8 | 4,9  | 0,33 |
| 0610033 | Łączna (3)            | 12,1 | 11,4 | 11,1 | 8,7 | 6,0 | 5,3 | 6,8 | 6,4  | 0,24 |
| 0610062 | Spiczyn (2)           | 12,9 | 13,1 | 12,4 | 9,8 | 7,5 | 6,0 | 7,0 | 6,8  | 0,28 |
| 0614083 | Nałęczów (3)          | 12,3 | 11,2 | 10,7 | 9,9 | 7,4 | 6,1 | 7,4 | 7,3  | 0,87 |
| 0617011 | Świdnik (1)           | 12,2 | 11,3 | 9,8  | 8,5 | 6,6 | 7,2 | 8,6 | 10,2 | 0,72 |
| 0617022 | Mełgiew (2)           | 12,5 | 12,1 | 11,2 | 9,3 | 7,7 | 7,3 | 8,2 | 9,1  | 0,45 |
| 0617033 | Piaski (3)            | 11,9 | 10,9 | 10,1 | 9,3 | 7,7 | 7,4 | 8,9 | 9,5  | 0,49 |
| 0663011 | Lublin (1)            | 8,7  | 7,9  | 7,9  | 7,1 | 5,5 | 5,0 | 6,4 | 7,0  | 4,69 |
| 1201011 | Bochnia (1)           | 9,7  | 9,0  | 8,0  | 6,3 | 4,6 | 3,5 | 5,3 | 5,1  | 2,03 |
| 1201022 | Bochnia (2)           | 9,1  | 8,5  | 7,1  | 5,2 | 3,5 | 3,3 | 4,5 | 5,0  | 0,18 |
| 1201032 | Drwinia (2)           | 7,2  | 7,2  | 6,4  | 3,4 | 3,0 | 2,7 | 4,3 | 4,7  | 0,06 |
| 1201052 | Łapanów (2)           | 9,7  | 7,8  | 6,5  | 3,9 | 3,4 | 1,8 | 4,1 | 5,0  | 0,37 |
| 1201063 | Nowy Wiśnicz (3)      | 9,7  | 8,8  | 7,8  | 5,6 | 3,4 | 3,0 | 4,9 | 4,8  | 0,40 |
| 1201072 | Rzezawa (2)           | 11,8 | 10,4 | 8,9  | 6,8 | 5,5 | 4,4 | 6,6 | 6,3  | 0,16 |
| 1201082 | Trzciana (2)          | 7,9  | 6,2  | 5,6  | 4,4 | 3,3 | 2,0 | 3,9 | 4,4  | 0,37 |
| 1201092 | Żegocina (2)          | 8,6  | 8,2  | 7,3  | 4,8 | 3,3 | 2,7 | 4,1 | 5,3  | 0,44 |
| 1206012 | Czernichów (2)        | 7,2  | 6,9  | 5,8  | 3,9 | 3,4 | 2,9 | 4,6 | 5,8  | 0,15 |
| 1206022 | Igołomia-Wawrzeńcz    | 5,1  | 4,4  | 4,3  | 3,6 | 2,5 | 1,3 | 2,9 | 3,6  | 0,26 |
| 1206032 | Iwanowice (2)         | 7,3  | 7,1  | 5,7  | 4,3 | 3,4 | 3,3 | 5,1 | 5,6  | 0,10 |
| 1206042 | Jerzmanowice-Przeg    | 6,2  | 5,9  | 5,1  | 3,8 | 3,3 | 2,9 | 4,2 | 4,9  | 0,09 |
| 1206052 | Kocmyrzów-Luborzy     | 6,3  | 5,8  | 5,1  | 3,9 | 3,3 | 3,0 | 5,1 | 5,4  | 0,11 |
| 1206063 | Krzeszowice (3)       | 9,2  | 8,9  | 7,8  | 6,5 | 5,3 | 4,6 | 5,9 | 7,2  | 0,49 |
| 1206072 | Liszki (2)            | 8,0  | 6,4  | 5,6  | 4,2 | 3,5 | 2,8 | 4,8 | 5,3  | 0,17 |
| 1206082 | Michałowice (2)       | 4,9  | 4,7  | 4,9  | 4,0 | 3,3 | 2,2 | 3,2 | 3,5  | 1,18 |
| 1206092 | Mogilany (2)          | 7,1  | 6,3  | 6,0  | 4,4 | 3,8 | 3,0 | 5,8 | 5,3  | 0,36 |
| 1206103 | Skała (3)             | 6,8  | 6,8  | 5,1  | 3,9 | 3,3 | 2,9 | 4,5 | 5,4  | 0,26 |
| 1206113 | Skawina (3)           | 9,2  | 7,8  | 6,9  | 5,6 | 4,2 | 4,1 | 6,6 | 7,3  | 0,88 |
| 1206123 | Słomniki (3)          | 10,5 | 9,3  | 8,7  | 7,0 | 6,5 | 6,2 | 8,4 | 9,8  | 0,26 |
| 1206132 | Sułoszowa (2)         | 6,9  | 6,6  | 6,0  | 4,2 | 3,4 | 3,5 | 5,1 | 6,3  | 0,08 |
| 1206143 | Świątniki Górne (3) * | 9,2  | 8,2  | 7,6  | 6,1 | 4,2 | 3,4 | 6,3 | 7,1  | 0,52 |
| 1206152 | Wielka Wieś (2)       | 5,2  | 5,2  | 4,0  | 3,5 | 2,8 | 2,0 | 3,4 | 3,8  | 0,30 |
| 1206162 | Zabierzów (2)         | 7,3  | 6,5  | 6,0  | 4,4 | 3,3 | 2,8 | 4,2 | 5,0  | 1,22 |

|         |                           |      |      |      |     |     |     |     |     |      |
|---------|---------------------------|------|------|------|-----|-----|-----|-----|-----|------|
| 1206172 | Zielonki (2)              | 4,6  | 3,7  | 3,1  | 2,2 | 1,6 | 2,2 | 3,5 | 3,8 | 0,47 |
| 1208022 | Gołcza (2)                | 9,3  | 7,9  | 7,5  | 6,6 | 4,4 | 4,2 | 5,1 | 6,0 | 0,11 |
| 1209013 | Dobczyce (3)              | 12,6 | 11,6 | 9,8  | 5,8 | 4,2 | 3,9 | 6,1 | 7,1 | 0,66 |
| 1209022 | Lubień (2)                | 11,0 | 10,3 | 8,9  | 6,9 | 4,7 | 4,4 | 6,3 | 6,9 | 0,16 |
| 1209033 | Myślenice (3)             | 10,9 | 10,0 | 8,6  | 6,8 | 4,8 | 5,0 | 7,2 | 7,8 | 1,16 |
| 1209042 | Pcim (2)                  | 10,8 | 9,3  | 7,9  | 5,7 | 4,3 | 3,8 | 6,5 | 7,4 | 0,40 |
| 1209052 | Raciechowice (2)          | 12,0 | 11,6 | 9,9  | 5,5 | 4,9 | 3,9 | 6,1 | 7,4 | 0,36 |
| 1209062 | Siepraw (2)               | 9,8  | 10,2 | 10,1 | 7,1 | 4,6 | 5,2 | 7,5 | 8,2 | 0,32 |
| 1209073 | Sułkowice (3)             | 10,5 | 9,4  | 8,8  | 6,8 | 5,1 | 6,2 | 8,4 | 8,7 | 0,41 |
| 1209082 | Tokarnia (2)              | 11,8 | 11,0 | 9,4  | 6,4 | 5,1 | 4,5 | 6,3 | 5,9 | 0,11 |
| 1209092 | Wiśniowa (2)              | 10,3 | 10,0 | 9,3  | 5,7 | 3,9 | 3,7 | 5,0 | 6,1 | 0,22 |
| 1212062 | Trzyciąż (2)              | 9,6  | 9,5  | 8,8  | 7,5 | 6,1 | 5,4 | 6,5 | 6,9 | 0,08 |
| 1214012 | Koniusza (2)              | 8,1  | 7,6  | 7,1  | 6,0 | 4,9 | 5,1 | 6,1 | 6,8 | 0,46 |
| 1214022 | Koszyce (2)               | 8,0  | 7,8  | 7,5  | 6,7 | 5,4 | 5,2 | 6,5 | 7,6 | 0,32 |
| 1214032 | Nowe Brzesko (2) *        | 8,4  | 7,9  | 7,4  | 6,2 | 4,5 | 5,2 | 6,7 | 7,2 | 0,22 |
| 1214053 | Proszowice (3)            | 11,3 | 10,5 | 9,6  | 8,2 | 6,4 | 6,8 | 8,5 | 9,1 | 0,63 |
| 1218022 | Brzeźnica (2)             | 8,9  | 7,9  | 7,2  | 6,0 | 4,1 | 3,6 | 4,8 | 5,4 | 0,11 |
| 1218033 | Kalwaria Zebrzydowska (2) | 8,8  | 7,5  | 7,8  | 6,3 | 4,2 | 3,5 | 4,6 | 5,5 | 1,21 |
| 1218042 | Lanckorona (2)            | 9,2  | 7,5  | 7,4  | 5,2 | 3,6 | 3,4 | 4,4 | 5,3 | 0,28 |
| 1218072 | Stryków (2)               | 9,5  | 8,7  | 8,4  | 6,8 | 4,4 | 3,8 | 6,1 | 6,4 | 0,09 |
| 1218093 | Wadowice (3)              | 10,1 | 8,8  | 8,1  | 7,1 | 5,3 | 4,7 | 6,4 | 6,6 | 1,57 |
| 1219012 | Biskupice (2)             | 9,6  | 7,8  | 7,0  | 5,1 | 3,6 | 2,6 | 4,2 | 5,6 | 0,18 |
| 1219022 | Gdów (2)                  | 10,6 | 9,4  | 7,9  | 5,4 | 3,7 | 2,8 | 4,4 | 5,3 | 0,21 |
| 1219032 | Kłaj (2)                  | 8,8  | 8,3  | 7,4  | 5,4 | 3,9 | 3,1 | 4,9 | 5,4 | 0,29 |
| 1219043 | Niepołomice (3)           | 8,3  | 7,3  | 5,8  | 3,6 | 3,1 | 2,4 | 4,0 | 4,1 | 0,68 |
| 1219053 | Wieliczka (3)             | 10,2 | 9,8  | 8,9  | 7,2 | 5,1 | 3,7 | 5,6 | 5,9 | 0,46 |
| 1261011 | Kraków (1)                | 6,0  | 5,3  | 5,0  | 4,0 | 2,9 | 2,1 | 3,2 | 3,8 | 6,99 |
| 1405011 | Milanówek (1)             | 6,7  | 6,7  | 5,8  | 3,9 | 2,3 | 1,9 | 3,4 | 3,4 | 0,95 |
| 1405021 | Podkowa Leśna (1)         | 4,9  | 4,8  | 5,0  | 3,4 | 1,9 | 1,7 | 2,6 | 2,2 | 0,80 |
| 1405032 | Baranów (2)               | 6,7  | 6,0  | 5,2  | 3,5 | 2,0 | 1,9 | 3,3 | 3,5 | 0,10 |
| 1405043 | Grodzisk Mazowiecki (2)   | 7,9  | 7,5  | 6,2  | 3,9 | 2,7 | 2,5 | 3,7 | 4,0 | 0,90 |
| 1405052 | Jaktorów (2)              | 7,6  | 7,6  | 6,4  | 4,0 | 2,2 | 1,9 | 3,5 | 4,3 | 0,36 |
| 1405062 | Żabia Wola (2)            | 7,7  | 7,1  | 6,3  | 3,9 | 2,0 | 2,2 | 3,9 | 3,4 | 0,47 |
| 1406032 | Chynów (2)                | 6,2  | 5,9  | 5,0  | 4,6 | 3,3 | 3,1 | 4,5 | 4,9 | 0,14 |
| 1406053 | Grójec (3)                | 7,8  | 7,2  | 6,5  | 5,5 | 4,4 | 4,0 | 6,1 | 6,1 | 1,00 |
| 1406092 | Pniewy (2)                | 7,1  | 7,1  | 5,8  | 5,2 | 4,5 | 4,2 | 5,2 | 4,5 | 0,15 |
| 1408011 | Legionowo (1)             | 10,3 | 10,0 | 9,0  | 7,3 | 5,3 | 3,6 | 5,3 | 4,9 | 0,24 |
| 1408022 | Jabłonna (2)              | 10,0 | 9,9  | 8,6  | 7,5 | 6,1 | 5,7 | 6,6 | 7,0 | 0,15 |

|         |                          |      |      |      |     |     |     |     |     |      |
|---------|--------------------------|------|------|------|-----|-----|-----|-----|-----|------|
| 1408032 | Nieporęt (2)             | 8,5  | 8,0  | 7,0  | 5,3 | 3,7 | 3,0 | 4,7 | 4,1 | 1,01 |
| 1408043 | Serock (3)               | 12,5 | 12,3 | 10,3 | 8,4 | 5,8 | 3,6 | 5,2 | 5,2 | 0,33 |
| 1408052 | Wieliszew (2) *          | 12,0 | 10,8 | 9,5  | 7,4 | 5,6 | 2,9 | 4,5 | 5,1 | 0,20 |
| 1412011 | Mińsk Mazowiecki (1)     | 10,1 | 10,3 | 9,3  | 8,0 | 5,8 | 4,0 | 5,0 | 5,2 | 0,73 |
| 1412042 | Cegłów (2)               | 8,9  | 8,4  | 8,4  | 6,5 | 4,8 | 3,2 | 3,3 | 4,1 | 0,40 |
| 1412052 | Dębe Wielkie (2)         | 9,9  | 10,3 | 9,6  | 7,9 | 5,1 | 3,2 | 3,7 | 3,7 | 0,07 |
| 1412062 | Dobre (2)                | 9,1  | 8,6  | 8,0  | 6,6 | 5,0 | 2,5 | 3,2 | 3,7 | 0,22 |
| 1412073 | Halinów (3) *            | 9,2  | 8,1  | 7,7  | 6,0 | 4,1 | 2,5 | 3,3 | 3,9 | 0,23 |
| 1412082 | Jakubów (2)              | 8,5  | 9,1  | 8,9  | 7,3 | 5,6 | 3,4 | 3,7 | 4,4 | 0,49 |
| 1412093 | Kałużyn (3)              | 11,3 | 12,1 | 10,9 | 8,6 | 6,2 | 4,1 | 4,3 | 5,5 | 0,14 |
| 1412102 | Łatowicz (2)             | 10,5 | 9,6  | 8,4  | 7,5 | 5,0 | 2,8 | 3,7 | 4,0 | 0,59 |
| 1412112 | Mińsk Mazowiecki (2)     | 10,4 | 10,5 | 10,3 | 8,6 | 5,7 | 3,9 | 5,0 | 6,1 | 0,13 |
| 1412122 | Mrozy (2)                | 9,0  | 8,3  | 8,1  | 5,9 | 4,1 | 3,1 | 3,4 | 4,2 | 0,26 |
| 1412132 | Siennica (2)             | 9,3  | 9,6  | 8,9  | 7,6 | 4,6 | 3,0 | 4,4 | 4,4 | 0,12 |
| 1412142 | Stanisławów (2)          | 9,2  | 9,5  | 8,2  | 6,9 | 4,2 | 2,6 | 3,6 | 4,3 | 0,43 |
| 1414011 | Nowy Dwór Mazowiecki (2) | 11,1 | 9,5  | 9,0  | 7,2 | 4,3 | 3,3 | 4,9 | 5,9 | 0,64 |
| 1414022 | Czosnów (2)              | 10,1 | 9,2  | 7,9  | 6,9 | 3,7 | 3,1 | 3,8 | 5,2 | 0,70 |
| 1414032 | Leoncin (2)              | 10,5 | 9,5  | 7,7  | 5,6 | 3,3 | 2,5 | 3,9 | 4,8 | 0,11 |
| 1414052 | Pomiechówek (2)          | 11,9 | 9,9  | 9,7  | 7,1 | 4,5 | 3,0 | 4,4 | 6,3 | 0,16 |
| 1414063 | Zakroczym (3)            | 13,3 | 10,9 | 11,2 | 9,8 | 5,6 | 3,8 | 6,9 | 7,5 | 0,19 |
| 1417011 | Józefów (1)              | 7,4  | 7,1  | 6,9  | 6,3 | 4,5 | 2,6 | 4,0 | 4,2 | 0,91 |
| 1417021 | Otwock (1)               | 9,7  | 9,8  | 9,5  | 8,3 | 5,8 | 3,6 | 5,4 | 5,4 | 0,75 |
| 1417032 | Celestynów (2)           | 10,0 | 9,2  | 9,3  | 8,0 | 5,4 | 3,5 | 4,8 | 4,9 | 0,47 |
| 1417043 | Karczew (3)              | 8,5  | 8,8  | 8,3  | 7,2 | 5,0 | 3,1 | 4,7 | 4,8 | 0,69 |
| 1417052 | Kołbiel (2)              | 7,2  | 7,5  | 6,2  | 5,7 | 3,7 | 2,9 | 3,9 | 4,0 | 0,21 |
| 1417082 | Wiązowna (2)             | 7,9  | 7,9  | 7,2  | 6,5 | 4,3 | 2,3 | 3,5 | 3,9 | 1,37 |
| 1418013 | Góra Kalwaria (3)        | 7,9  | 7,4  | 7,4  | 5,9 | 4,4 | 4,0 | 5,6 | 6,5 | 0,50 |
| 1418023 | Konstancin-Jeziorna      | 6,9  | 6,4  | 6,1  | 5,0 | 4,4 | 3,6 | 4,8 | 5,6 | 0,90 |
| 1418032 | Lesznów (2)              | 5,4  | 5,0  | 4,7  | 3,7 | 3,0 | 2,6 | 3,7 | 4,0 | 2,30 |
| 1418043 | Piaseczno (3)            | 5,2  | 5,0  | 4,9  | 3,8 | 2,8 | 2,5 | 4,0 | 4,0 | 3,37 |
| 1418052 | Prażmów (2)              | 8,4  | 8,3  | 7,0  | 5,4 | 3,9 | 3,3 | 5,2 | 5,8 | 0,06 |
| 1421011 | Piastów (1)              | 6,2  | 5,9  | 5,5  | 4,9 | 3,7 | 2,3 | 3,7 | 3,9 | 0,26 |
| 1421021 | Pruszków (1)             | 7,9  | 7,4  | 7,1  | 6,0 | 4,2 | 3,0 | 4,6 | 4,9 | 0,72 |
| 1421033 | Brwinów (3)              | 7,9  | 7,5  | 6,7  | 6,0 | 4,4 | 3,2 | 4,4 | 4,8 | 0,45 |
| 1421042 | Michałowice (2)          | 5,6  | 5,3  | 4,4  | 3,1 | 2,5 | 2,4 | 3,6 | 4,4 | 0,24 |
| 1421052 | Nadarzyn (2)             | 5,7  | 5,4  | 4,8  | 4,1 | 3,0 | 1,7 | 3,4 | 3,2 | 1,39 |
| 1421062 | Raszyn (2)               | 5,2  | 5,3  | 5,1  | 4,2 | 3,2 | 2,1 | 3,4 | 3,0 | 1,93 |
| 1428011 | Sochaczew (1)            | 11,8 | 10,0 | 8,8  | 8,0 | 6,3 | 4,4 | 6,6 | 6,5 | 0,28 |

|         |                       |      |      |      |      |     |     |      |     |       |
|---------|-----------------------|------|------|------|------|-----|-----|------|-----|-------|
| 1428022 | Brochów (2) *         | 11,7 | 11,6 | 11,0 | 10,6 | 8,2 | 6,8 | 9,1  | 8,6 | 0,34  |
| 1428052 | Nowa Sucha (2)        | 8,4  | 8,0  | 6,9  | 5,8  | 4,5 | 3,2 | 5,2  | 5,4 | 0,22  |
| 1428072 | Sochaczew (2)         | 11,8 | 9,4  | 8,6  | 7,7  | 5,9 | 3,8 | 6,1  | 5,6 | 1,35  |
| 1428082 | Teresin (2)           | 8,6  | 7,5  | 6,5  | 6,3  | 5,0 | 3,8 | 5,6  | 5,1 | 0,48  |
| 1432013 | Błonie (3)            | 10,6 | 9,4  | 7,8  | 5,6  | 3,1 | 2,0 | 3,6  | 3,6 | 1,03  |
| 1432022 | Izabelin (2)          | 6,0  | 5,3  | 5,5  | 4,3  | 2,9 | 2,8 | 3,6  | 4,1 | 0,80  |
| 1432032 | Kampinos (2)          | 11,0 | 10,2 | 9,2  | 6,7  | 4,8 | 3,0 | 3,5  | 5,4 | 0,39  |
| 1432042 | Leszno (2)            | 10,9 | 9,0  | 8,2  | 6,2  | 4,3 | 3,3 | 4,1  | 3,9 | 0,22  |
| 1432053 | Łomianki (3)          | 6,9  | 5,5  | 5,8  | 4,8  | 3,6 | 2,6 | 3,7  | 4,4 | 1,64  |
| 1432063 | Ożarów Mazowiecki     | 8,6  | 7,2  | 5,8  | 4,8  | 3,1 | 2,4 | 3,6  | 4,1 | 0,81  |
| 1432072 | Stare Babice (2)      | 5,4  | 4,5  | 4,2  | 3,3  | 2,4 | 1,8 | 3,1  | 3,4 | 0,57  |
| 1434011 | Kobyłka (1)           | 10,4 | 10,2 | 9,4  | 8,5  | 5,0 | 4,4 | 6,6  | 6,6 | 0,38  |
| 1434021 | Marki (1)             | 10,3 | 9,5  | 8,1  | 7,4  | 3,9 | 2,7 | 4,4  | 4,8 | 0,53  |
| 1434031 | Ząbki (1)             | 6,9  | 6,7  | 5,9  | 5,6  | 3,0 | 2,5 | 3,8  | 4,0 | 0,64  |
| 1434041 | Zielonka (1)          | 8,5  | 8,2  | 7,7  | 6,8  | 3,9 | 3,1 | 5,1  | 5,0 | 0,92  |
| 1434052 | Dąbrówka (2)          | 13,3 | 12,5 | 11,9 | 10,3 | 5,2 | 3,2 | 5,4  | 5,6 | 0,11  |
| 1434072 | Klembów (2)           | 13,1 | 12,1 | 11,1 | 9,4  | 6,0 | 5,1 | 7,4  | 7,7 | 0,17  |
| 1434082 | Poświętne (2)         | 13,0 | 13,2 | 12,1 | 10,5 | 5,3 | 4,3 | 7,4  | 7,4 | 0,08  |
| 1434093 | Radzymin (3)          | 13,5 | 13,3 | 12,2 | 11,5 | 5,6 | 3,9 | 6,0  | 6,3 | 0,59  |
| 1434113 | Tłuszcz (3)           | 15,5 | 14,3 | 12,7 | 10,8 | 7,1 | 6,4 | 8,7  | 9,5 | 0,11  |
| 1434123 | Wołomin (3)           | 11,9 | 11,6 | 11,2 | 10,1 | 5,6 | 4,8 | 7,0  | 7,2 | 0,78  |
| 1435042 | Somianka (2)          | 14,8 | 15,3 | 14,1 | 10,9 | 7,9 | 6,8 | 8,7  | 7,8 | 0,60  |
| 1435053 | Wyszków (3)           | 18,8 | 17,6 | 16,2 | 11,4 | 8,0 | 7,1 | 10,1 | 9,8 | 0,55  |
| 1435062 | Zabrodzie (2)         | 16,1 | 15,8 | 15,3 | 11,8 | 9,1 | 6,4 | 8,1  | 7,8 | 0,19  |
| 1438011 | Żyrardów (1)          | 2,2  | 10,4 | 8,8  | 7,0  | 6,2 | 5,4 | 7,2  | 7,7 | 0,39  |
| 1438023 | Mszczonów (3)         | 8,6  | 8,6  | 7,4  | 5,5  | 4,3 | 4,3 | 5,7  | 5,7 | 2,01  |
| 1438032 | Puszcza Mariańska (1) | 5,5  | 10,8 | 9,8  | 7,7  | 6,8 | 5,5 | 6,7  | 7,1 | 0,15  |
| 1438042 | Radziejowice (2)      | 22,3 | 10,8 | 10,2 | 7,5  | 7,1 | 4,9 | 7,1  | 7,0 | 0,63  |
| 1438052 | Wiskitki (2)          | 51,2 | 10,8 | 9,9  | 7,9  | 7,2 | 5,8 | 7,6  | 8,0 | 0,17  |
| 1465011 | M.st.Warszawa (1) *   | 5,7  | 5,8  | 5,2  | 4,4  | 2,9 | 1,9 | 2,8  | 3,6 | 13,07 |
| 2204011 | Pruszcz Gdański (1)   | 8,8  | 7,5  | 5,6  | 3,5  | 2,2 | 1,4 | 3,2  | 3,6 | 1,29  |
| 2204022 | Cedry Wielkie (2)     | 15,0 | 13,0 | 10,1 | 7,1  | 3,8 | 2,1 | 3,9  | 4,6 | 0,21  |
| 2204032 | Kolbudy (2) *         | 9,1  | 8,5  | 5,9  | 3,7  | 2,0 | 1,5 | 2,9  | 3,3 | 0,28  |
| 2204042 | Pruszcz Gdański (2)   | 11,0 | 9,8  | 7,5  | 4,7  | 2,5 | 1,8 | 3,4  | 3,6 | 0,75  |
| 2204052 | Przywidz (2)          | 11,3 | 10,5 | 8,7  | 5,9  | 3,3 | 2,3 | 4,2  | 4,6 | 0,05  |
| 2204062 | Pszczółki (2)         | 12,2 | 10,3 | 7,7  | 5,0  | 2,5 | 1,5 | 3,5  | 3,9 | 0,47  |
| 2204072 | Suchy Dąb (2)         | 12,5 | 12,2 | 9,9  | 6,6  | 3,7 | 2,1 | 4,6  | 4,9 | 0,13  |
| 2204082 | Trąbki Wielkie (2)    | 14,0 | 13,1 | 9,8  | 5,7  | 3,1 | 1,9 | 4,4  | 4,9 | 0,15  |

|         |                    |      |      |      |      |      |      |      |      |      |
|---------|--------------------|------|------|------|------|------|------|------|------|------|
| 2205012 | Chmielno (2)       | 14,2 | 13,5 | 11,1 | 9,1  | 5,5  | 3,4  | 4,1  | 5,8  | 0,45 |
| 2205023 | Kartuzy (3)        | 13,3 | 12,2 | 11,1 | 7,9  | 5,4  | 3,9  | 6,0  | 6,9  | 0,75 |
| 2205032 | Przodkowo (2)      | 9,6  | 8,7  | 8,4  | 5,8  | 4,1  | 2,5  | 4,5  | 4,7  | 0,48 |
| 2205042 | Sierakowice (2)    | 13,7 | 12,1 | 10,9 | 8,1  | 5,3  | 3,6  | 5,5  | 6,3  | 0,60 |
| 2205052 | Somonino (2)       | 14,5 | 14,1 | 12,2 | 8,4  | 5,5  | 4,3  | 6,3  | 7,8  | 0,33 |
| 2205062 | Stężycza (2)       | 13,3 | 12,2 | 11,2 | 8,9  | 5,0  | 3,3  | 5,8  | 6,9  | 0,19 |
| 2205072 | Sulęczyno (2)      | 12,6 | 12,9 | 12,1 | 9,7  | 5,7  | 4,2  | 5,7  | 6,5  | 0,15 |
| 2205083 | Żukowo (3)         | 10,0 | 8,7  | 7,9  | 5,4  | 3,5  | 2,4  | 3,9  | 4,8  | 0,92 |
| 2208011 | Lębork (1)         | 20,6 | 17,3 | 15,4 | 14,0 | 9,5  | 7,7  | 9,7  | 9,8  | 1,12 |
| 2208021 | Łeba (1)           | 17,1 | 16,9 | 16,1 | 15,0 | 12,2 | 8,8  | 9,6  | 9,0  | 0,10 |
| 2208032 | Cewice (2)         | 24,3 | 22,3 | 21,0 | 19,9 | 14,8 | 12,0 | 11,7 | 12,2 | 1,62 |
| 2208042 | Nowa Wieś Lęborska | 22,7 | 19,9 | 18,3 | 17,6 | 12,7 | 10,7 | 12,3 | 10,9 | 1,71 |
| 2208052 | Wicko (2)          | 24,9 | 21,9 | 20,8 | 19,2 | 15,0 | 12,3 | 12,6 | 14,0 | 4,99 |
| 2209011 | Malbork (1)        | 17,0 | 15,9 | 13,9 | 11,4 | 9,1  | 7,2  | 9,7  | 9,6  | 0,07 |
| 2209032 | Lichnowy (2)       | 25,7 | 24,1 | 20,0 | 16,4 | 13,2 | 9,3  | 13,3 | 12,0 | 0,26 |
| 2209042 | Malbork (2)        | 19,6 | 19,2 | 16,0 | 13,0 | 10,9 | 9,4  | 11,0 | 10,7 | 0,64 |
| 2209062 | Miłoradz (2)       | 24,2 | 22,6 | 19,6 | 16,8 | 12,9 | 11,2 | 14,4 | 13,0 | 0,13 |
| 2209073 | Nowy Staw (3)      | 23,4 | 21,9 | 20,1 | 16,7 | 14,5 | 12,1 | 13,7 | 14,1 | 0,05 |
| 2209082 | Stare Pole (2)     | 23,8 | 22,1 | 20,5 | 17,5 | 14,1 | 10,3 | 13,5 | 13,9 | 0,76 |
| 2210011 | Krynica Morska (1) | 21,5 | 22,5 | 18,8 | 19,5 | 15,4 | 12,8 | 13,6 | 13,9 | 2,76 |
| 2210023 | Nowy Dwór Gdański  | 27,7 | 27,0 | 21,3 | 18,7 | 15,1 | 12,0 | 14,7 | 15,5 | 0,54 |
| 2210032 | Ostaszewo (2)      | 23,9 | 20,9 | 16,8 | 16,1 | 11,9 | 8,1  | 13,0 | 14,2 | 0,28 |
| 2210042 | Stegna (2)         | 27,8 | 26,9 | 21,6 | 18,7 | 13,8 | 10,5 | 12,2 | 13,2 | 0,29 |
| 2210052 | Sztutowo (2)       | 28,7 | 27,8 | 23,7 | 18,8 | 15,6 | 10,9 | 13,5 | 14,4 | 0,32 |
| 2211011 | Hel (1)            | 9,5  | 9,3  | 10,4 | 11,8 | 5,8  | 3,9  | 4,4  | 5,3  | 1,72 |
| 2211031 | Puck (1)           | 11,3 | 11,4 | 10,4 | 9,9  | 6,8  | 4,7  | 7,3  | 6,7  | 1,41 |
| 2211041 | Władysławowo (1)   | 9,7  | 11,0 | 11,4 | 8,5  | 6,3  | 4,9  | 6,0  | 6,2  | 1,21 |
| 2211052 | Kosakowo (2)       | 7,7  | 7,7  | 8,4  | 7,6  | 4,4  | 2,7  | 5,3  | 4,4  | 0,55 |
| 2211062 | Krokowa (2)        | 14,4 | 13,0 | 11,3 | 7,8  | 6,0  | 4,1  | 6,3  | 6,7  | 0,95 |
| 2211072 | Puck (2)           | 12,3 | 12,6 | 12,1 | 7,4  | 6,6  | 4,0  | 6,4  | 6,8  | 0,26 |
| 2214011 | Tczew (1)          | 13,1 | 11,8 | 10,4 | 9,6  | 7,7  | 4,6  | 7,3  | 6,5  | 2,10 |
| 2214023 | Gniew (3)          | 21,3 | 20,6 | 18,2 | 14,2 | 11,3 | 6,1  | 9,1  | 8,2  | 1,61 |
| 2214032 | Morzeszczyn (2)    | 23,4 | 22,9 | 20,4 | 16,5 | 13,5 | 6,8  | 10,3 | 9,2  | 1,81 |
| 2214043 | Pelplin (3)        | 19,6 | 19,7 | 17,0 | 14,9 | 12,3 | 6,1  | 8,7  | 8,2  | 0,33 |
| 2214052 | Subkowy (2)        | 17,1 | 17,5 | 16,2 | 13,5 | 10,2 | 6,2  | 9,3  | 8,8  | 0,52 |
| 2214062 | Tczew (2)          | 16,4 | 15,7 | 13,8 | 12,3 | 9,3  | 5,1  | 7,6  | 7,0  | 0,63 |
| 2215011 | Reda (1)           | 9,4  | 8,6  | 6,7  | 4,4  | 3,4  | 3,3  | 5,8  | 6,0  | 0,40 |
| 2215021 | Rumia (1)          | 8,5  | 8,0  | 6,2  | 4,1  | 3,0  | 2,6  | 5,0  | 5,2  | 0,35 |

|         |                           |      |      |      |      |     |     |     |     |      |
|---------|---------------------------|------|------|------|------|-----|-----|-----|-----|------|
| 2215031 | Wejherowo (1)             | 11,6 | 10,7 | 8,1  | 5,6  | 4,3 | 4,1 | 6,6 | 7,1 | 0,83 |
| 2215042 | Choczewo (2)              | 21,8 | 19,2 | 14,9 | 11,1 | 6,0 | 4,6 | 8,2 | 9,4 | 0,14 |
| 2215052 | Gniewino (2)              | 17,2 | 13,7 | 9,5  | 6,1  | 4,1 | 3,5 | 6,2 | 7,6 | 0,27 |
| 2215062 | Linia (2)                 | 12,4 | 11,9 | 9,2  | 6,9  | 3,5 | 3,7 | 5,4 | 7,3 | 0,16 |
| 2215072 | Luzino (2)                | 10,7 | 9,7  | 8,0  | 5,6  | 3,6 | 3,0 | 6,2 | 7,4 | 0,42 |
| 2215082 | Łęczyce (2)               | 16,5 | 15,3 | 13,8 | 9,9  | 5,7 | 3,8 | 7,2 | 8,7 | 0,21 |
| 2215092 | Szemud (2)                | 8,0  | 6,9  | 5,3  | 3,4  | 2,2 | 2,2 | 4,0 | 4,7 | 0,34 |
| 2215102 | Wejherowo (2)             | 12,0 | 10,7 | 8,2  | 5,3  | 3,8 | 3,6 | 6,2 | 7,6 | 0,88 |
| 2261011 | Gdańsk (1)                | 8,4  | 7,5  | 6,2  | 3,9  | 2,4 | 1,6 | 3,2 | 3,7 | 0,07 |
| 2262011 | Gdynia (1)                | 6,6  | 5,9  | 5,0  | 3,7  | 1,6 | 1,4 | 3,4 | 3,5 | 1,18 |
| 2264011 | Sopot (1)                 | 6,2  | 5,9  | 5,0  | 3,4  | 1,7 | 1,4 | 2,6 | 3,0 | 0,18 |
| 3003011 | Gniezno (1)               | 14,9 | 14,6 | 12,7 | 10,5 | 6,8 | 6,1 | 7,6 | 7,4 | 1,14 |
| 3003023 | Czarniejewo (3)           | 14,9 | 14,5 | 13,2 | 9,9  | 7,2 | 5,3 | 6,2 | 5,8 | 0,56 |
| 3003032 | Gniezno (2)               | 9,7  | 9,1  | 6,6  | 4,1  | 3,5 | 2,8 | 3,1 | 6,2 | 0,42 |
| 3003042 | Kiszkowo (2)              | 13,2 | 13,2 | 9,7  | 8,3  | 3,8 | 3,6 | 5,1 | 5,1 | 0,24 |
| 3003062 | Łubowo (2)                | 11,8 | 11,4 | 10,6 | 8,0  | 4,7 | 4,4 | 5,4 | 5,3 | 0,46 |
| 3005012 | Granowo (2)               | 9,3  | 8,8  | 7,5  | 5,2  | 3,4 | 2,2 | 5,4 | 5,1 | 0,31 |
| 3005023 | Grodzisk Wielkopolski (2) | 9,1  | 7,2  | 6,4  | 5,2  | 4,0 | 3,2 | 6,1 | 5,9 | 1,28 |
| 3011011 | Kościan (1)               | 9,2  | 9,4  | 8,1  | 5,5  | 3,2 | 2,8 | 5,4 | 4,6 | 0,93 |
| 3011023 | Czempiń (3)               | 10,2 | 9,4  | 8,3  | 5,6  | 3,1 | 2,3 | 4,2 | 4,9 | 0,38 |
| 3011032 | Kościan (2)               | 10,6 | 10,2 | 9,0  | 6,5  | 3,5 | 2,6 | 4,9 | 5,1 | 0,32 |
| 3015043 | Nowy Tomyśl (3)           | 9,1  | 8,0  | 7,2  | 4,7  | 2,3 | 2,3 | 4,2 | 4,0 | 1,41 |
| 3015053 | Opalenica (3)             | 9,1  | 8,7  | 7,4  | 4,9  | 2,3 | 2,1 | 3,1 | 2,9 | 0,59 |
| 3016013 | Oborniki (3)              | 12,7 | 11,6 | 9,5  | 6,8  | 3,5 | 2,9 | 5,4 | 5,5 | 0,92 |
| 3016023 | Rogoźno (3)               | 14,0 | 13,5 | 11,9 | 9,0  | 6,2 | 3,6 | 5,4 | 5,8 | 0,45 |
| 3021011 | Luboń (1)                 | 6,5  | 6,1  | 5,4  | 4,1  | 2,1 | 1,1 | 2,4 | 2,6 | 0,38 |
| 3021021 | Puszczykowo (1)           | 6,7  | 6,3  | 5,8  | 4,6  | 2,7 | 1,3 | 2,4 | 2,5 | 1,21 |
| 3021033 | Buk (3)                   | 6,9  | 7,3  | 6,6  | 4,5  | 2,2 | 1,6 | 2,5 | 2,4 | 0,67 |
| 3021042 | Czerwonak (2)             | 5,5  | 5,2  | 4,8  | 3,5  | 1,7 | 1,1 | 2,3 | 2,1 | 0,68 |
| 3021052 | Dopiewo (2)               | 6,0  | 6,1  | 5,1  | 3,6  | 2,1 | 1,0 | 2,1 | 2,2 | 0,78 |
| 3021062 | Kleszczewo (2)            | 5,9  | 6,4  | 5,5  | 4,2  | 2,1 | 0,9 | 1,7 | 2,4 | 0,52 |
| 3021072 | Komorniki (2)             | 5,7  | 5,2  | 4,4  | 3,2  | 1,6 | 0,9 | 1,7 | 1,9 | 1,15 |
| 3021083 | Kostrzyn (3)              | 8,1  | 8,4  | 7,8  | 5,8  | 2,5 | 1,2 | 2,9 | 2,5 | 0,40 |
| 3021093 | Kórnik (3)                | 6,9  | 6,6  | 6,3  | 4,6  | 1,8 | 0,9 | 2,1 | 1,9 | 1,39 |
| 3021103 | Mosina (3)                | 7,8  | 7,1  | 6,4  | 4,7  | 2,5 | 1,5 | 2,7 | 2,7 | 0,60 |
| 3021113 | Murowana Goślina (3)      | 7,3  | 7,4  | 6,3  | 5,1  | 2,6 | 1,1 | 2,7 | 2,7 | 0,42 |
| 3021123 | Pobiedziska (3)           | 8,1  | 8,1  | 7,7  | 6,4  | 3,6 | 1,4 | 2,6 | 2,7 | 0,28 |
| 3021132 | Rokietnica (2)            | 6,1  | 5,4  | 5,0  | 3,8  | 2,5 | 0,9 | 2,1 | 1,9 | 0,47 |

|         |                    |      |      |      |      |     |     |      |      |      |
|---------|--------------------|------|------|------|------|-----|-----|------|------|------|
| 3021143 | Stęszew (3)        | 7,1  | 6,7  | 7,0  | 5,0  | 2,9 | 1,2 | 2,8  | 2,6  | 1,03 |
| 3021152 | Suchy Las (2)      | 4,1  | 3,9  | 3,5  | 2,6  | 1,4 | 0,9 | 1,8  | 2,1  | 1,46 |
| 3021163 | Swarzędz (3)       | 5,7  | 5,4  | 4,7  | 3,6  | 1,7 | 1,1 | 2,1  | 2,3  | 0,91 |
| 3021172 | Tarnowo Podgórne ( | 4,9  | 4,7  | 4,0  | 2,9  | 1,6 | 0,9 | 1,8  | 2,0  | 4,68 |
| 3024022 | Duszniki (2)       | 8,6  | 8,1  | 7,6  | 5,8  | 3,6 | 3,4 | 5,4  | 4,9  | 0,18 |
| 3024032 | Kaźmierz (2)       | 8,1  | 8,4  | 7,5  | 5,0  | 3,9 | 2,7 | 5,3  | 5,5  | 0,71 |
| 3024073 | Szamotuły (3)      | 11,8 | 11,0 | 10,5 | 8,4  | 5,5 | 4,2 | 7,4  | 7,7  | 0,43 |
| 3025012 | Dominowo (2)       | 16,6 | 18,2 | 15,6 | 11,0 | 8,4 | 7,0 | 9,3  | 8,9  | 0,14 |
| 3025043 | Środa Wielkopolska | 13,1 | 13,3 | 11,6 | 9,3  | 5,7 | 6,1 | 8,7  | 8,7  | 1,04 |
| 3025052 | Zaniemyśl (2)      | 13,2 | 12,0 | 10,6 | 8,7  | 5,6 | 4,8 | 7,9  | 7,0  | 0,43 |
| 3026012 | Brodnica (2)       | 13,1 | 11,1 | 9,7  | 7,1  | 3,5 | 2,8 | 4,9  | 4,8  | 0,39 |
| 3026043 | Śrem (3)           | 10,1 | 8,8  | 7,5  | 6,0  | 3,5 | 2,7 | 5,2  | 4,8  | 0,86 |
| 3028011 | Wągrowiec (1)      | 15,7 | 14,2 | 12,4 | 10,2 | 7,8 | 5,8 | 8,9  | 9,3  | 0,98 |
| 3028053 | Skoki (3)          | 15,1 | 14,0 | 11,9 | 9,9  | 6,7 | 5,0 | 8,0  | 9,6  | 0,24 |
| 3028072 | Wągrowiec (2)      | 16,1 | 15,3 | 13,0 | 10,9 | 9,0 | 7,1 | 10,1 | 10,8 | 0,39 |
| 3030033 | Nekla (3) *        | 11,5 | 11,0 | 8,9  | 6,9  | 4,1 | 3,9 | 5,4  | 5,0  | 0,88 |
| 3030053 | Września (3)       | 14,5 | 13,3 | 12,8 | 10,4 | 6,8 | 6,0 | 8,3  | 7,5  | 0,83 |
| 3064011 | Poznań (1)         | 5,7  | 5,6  | 5,1  | 4,2  | 2,5 | 1,5 | 2,8  | 3,1  | 4,33 |

Source: data from Poland's Central Statistical Office (GUS)
