# Supplementary material
Source: MDPI journal article supplement (https://www.mdpi.com/2071-1050/10/3/837)
Supplement: s1 [file s1]

| KOD GUS | Municipality         | Share of agricultural land held by farms in the overall surface area of a municipality - in 2010 [%] | Type of municipality - as of 2010 | Distance from the centre of the municipality to the centre of the MA core [km] | Travel time from the municipality's centre to the centre of MA core [minutes]* | Direct border with the cores | Length of municipality hard surfaced roads per 100 km2 of surface area - average for 2003 [km/100 km2] | Length of municipality hard surfaced roads per 100 km2 of surface area - average for 2007 [km/100 km2] | Agricultural Production Space Valuation Ratio [point]** |
|---------|----------------------|------------------------------------------------------------------------------------------------------|-----------------------------------|--------------------------------------------------------------------------------|--------------------------------------------------------------------------------|------------------------------|--------------------------------------------------------------------------------------------------------|--------------------------------------------------------------------------------------------------------|---------------------------------------------------------|
| 0214011 | Oleśnica (1)         | 67,0%                                                                                                | Urban                             | 31,3                                                                           | 47,5                                                                           | No                           | 92,1                                                                                                   | 92,1                                                                                                   | 92,8                                                    |
| 0214032 | Dobroszyce (2)       | 28,7%                                                                                                | Rural                             | 36,7                                                                           | 45                                                                             | No                           | 48,6                                                                                                   | 30,2                                                                                                   | 71                                                      |
| 0214062 | Oleśnica (2)         | 43,9%                                                                                                | Rural                             | 31,3                                                                           | 47,5                                                                           | No                           | 23,4                                                                                                   | 23,9                                                                                                   | 72,2                                                    |
| 0215011 | Oława (1)            | 68,3%                                                                                                | Urban                             | 27,6                                                                           | 47,5                                                                           | No                           | 84,1                                                                                                   | 85,9                                                                                                   | 84                                                      |
| 0215022 | Domaniów (2)         | 94,9%                                                                                                | Rural                             | 30,7                                                                           | 45                                                                             | No                           | 8,9                                                                                                    | 8,9                                                                                                    | 107,4                                                   |
| 0215033 | Jelcz-Laskowice (3)  | 31,6%                                                                                                | Urban-rural                       | 28,1                                                                           | 50                                                                             | No                           | 12,9                                                                                                   | 13,7                                                                                                   | 68,9                                                    |
| 0215042 | Oława (2)            | 48,4%                                                                                                | Rural                             | 27,6                                                                           | 47,5                                                                           | No                           | 3,7                                                                                                    | 3,7                                                                                                    | 84                                                      |
| 0217012 | Borów (2)            | 75,3%                                                                                                | Rural                             | 31,4                                                                           | 50                                                                             | No                           | 14,2                                                                                                   | 14,2                                                                                                   | 105,2                                                   |
| 0218012 | Kostomłoty (2)       | 58,1%                                                                                                | Rural                             | 33                                                                             | 42,5                                                                           | No                           | 6,4                                                                                                    | 7,0                                                                                                    | 90,8                                                    |
| 0218032 | Miękinia (2)         | 38,9%                                                                                                | Rural                             | 23,5                                                                           | 42                                                                             | Yes                          | 13,9                                                                                                   | 13,9                                                                                                   | 81,9                                                    |
| 0218043 | Środa Śląska (3)     | 49,5%                                                                                                | Urban-rural                       | 32,4                                                                           | 52                                                                             | No                           | 17,1                                                                                                   | 17,0                                                                                                   | 80,9                                                    |
| 0220013 | Oborniki Śląskie (3) | 57,0%                                                                                                | Urban-rural                       | 25,5                                                                           | 45                                                                             | Yes                          | 16,3                                                                                                   | 16,2                                                                                                   | 71,7                                                    |
| 0220023 | Prusice (3) *        | 45,8%                                                                                                | Urban-rural                       | 34,5                                                                           | 50                                                                             | No                           | 7,6                                                                                                    | 7,6                                                                                                    | 67,6                                                    |
| 0220033 | Trzebnica (3)        | 49,0%                                                                                                | Urban-rural                       | 26                                                                             | 42                                                                             | No                           | 23,0                                                                                                   | 23,0                                                                                                   | 75,3                                                    |
| 0220042 | Wisznia Mała (2)     | 42,9%                                                                                                | Rural                             | 15,4                                                                           | 35                                                                             | Yes                          | 9,8                                                                                                    | 10,1                                                                                                   | 89,6                                                    |
| 0220052 | Zawonia (2)          | 30,6%                                                                                                | Rural                             | 32,5                                                                           | 45                                                                             | No                           | 13,5                                                                                                   | 13,6                                                                                                   | 55,3                                                    |
| 0222013 | Brzeg Dolny (3)      | 28,7%                                                                                                | Urban-rural                       | 37,5                                                                           | 52                                                                             | No                           | 33,2                                                                                                   | 33,2                                                                                                   | 77,1                                                    |
| 0223012 | Czernica (2)         | 44,5%                                                                                                | Rural                             | 20,8                                                                           | 42                                                                             | Yes                          | 49,9                                                                                                   | 31,7                                                                                                   | 69,3                                                    |
| 0223022 | Długoleś (2)         | 53,7%                                                                                                | Rural                             | 18,8                                                                           | 36                                                                             | Yes                          | 6,7                                                                                                    | 7,2                                                                                                    | 82,6                                                    |
| 0223032 | Jordanów Śląski (2)  | 65,6%                                                                                                | Rural                             | 37,4                                                                           | 50                                                                             | No                           | 21,2                                                                                                   | 21,2                                                                                                   | 92,7                                                    |
| 0223043 | Kąty Wrocławskie     | 54,7%                                                                                                | Urban-rural                       | 19,9                                                                           | 33                                                                             | Yes                          | 21,0                                                                                                   | 18,9                                                                                                   | 95,9                                                    |
| 0223052 | Kobierzyce (2)       | 62,1%                                                                                                | Rural                             | 22,2                                                                           | 34                                                                             | Yes                          | 65,4                                                                                                   | 65,4                                                                                                   | 104,1                                                   |
| 0223062 | Mietków (2)          | 50,7%                                                                                                | Rural                             | 26,9                                                                           | 47                                                                             | No                           | 20,9                                                                                                   | 20,9                                                                                                   | 95,9                                                    |
| 0223073 | Sobótka (3)          | 50,0%                                                                                                | Urban-rural                       | 35,4                                                                           | 50                                                                             | No                           | 32,5                                                                                                   | 32,4                                                                                                   | 92,7                                                    |
| 0223083 | Siechnice (3) *      | 43,4%                                                                                                | Urban-rural                       | 13,1                                                                           | 29                                                                             | Yes                          | 30,7                                                                                                   | 30,8                                                                                                   | 95                                                      |
| 0223092 | Żórawina (2)         | 50,5%                                                                                                | Rural                             | 15,6                                                                           | 33                                                                             | Yes                          | 48,3                                                                                                   | 26,2                                                                                                   | 108,6                                                   |
| 0264011 | Wrocław (1)          | 33,4%                                                                                                | Urban                             | -                                                                              | -                                                                              | Core                         | 195,1                                                                                                  | 195,1                                                                                                  | 88,5                                                    |
| 0608011 | Lubartów (1)         | 71,1%                                                                                                | Urban                             | 25,6                                                                           | 30                                                                             | No                           | 226,4                                                                                                  | 248,7                                                                                                  | 58,8                                                    |
| 0608072 | Lubartów (2)         | 44,8%                                                                                                | Rural                             | 25,6                                                                           | 30                                                                             | No                           | 20,9                                                                                                   | 21,5                                                                                                   | 64,1                                                    |

|         |                     |       |             |      |    |      |       |       |       |
|---------|---------------------|-------|-------------|------|----|------|-------|-------|-------|
| 0609013 | Bełżyce (3)         | 77,0% | Urban-rural | 26,9 | 42 | No   | 13,7  | 15,2  | 86,9  |
| 0609033 | Bychawa (3)         | 91,7% | Urban-rural | 33,1 | 47 | No   | 12,3  | 12,6  | 93,2  |
| 0609042 | Garbów (2)          | 78,1% | Rural       | 24   | 25 | No   | 81,9  | 81,9  | 85,5  |
| 0609052 | Głusk (2)           | 73,7% | Rural       | 13,4 | 22 | Yes  | 64,7  | 64,6  | 90,7  |
| 0609062 | Jabłonna (2)        | 66,2% | Rural       | 21,6 | 35 | No   | 35,9  | 37,6  | 88,2  |
| 0609072 | Jastków (2)         | 75,5% | Rural       | 17,9 | 30 | Yes  | 54,7  | 55,6  | 100,8 |
| 0609082 | Konopnica (2)       | 72,1% | Rural       | 14,7 | 28 | Yes  | 77,6  | 77,5  | 103,1 |
| 0609102 | Niedrzwica Duża (2) | 84,7% | Rural       | 25,9 | 40 | No   | 12,2  | 12,2  | 85,7  |
| 0609112 | Niemce (2)          | 73,4% | Rural       | 14,1 | 24 | Yes  | 47,5  | 59,2  | 85,5  |
| 0609122 | Strzyżewice (2)     | 67,2% | Rural       | 26,8 | 42 | No   | 16,5  | 19,5  | 87,1  |
| 0609132 | Wojciechów (2)      | 81,3% | Rural       | 29,2 | 42 | No   | 27,2  | 27,2  | 98,5  |
| 0609142 | Wólka (2)           | 62,6% | Rural       | 10,5 | 23 | Yes  | 38,5  | 59,1  | 85,3  |
| 0610033 | Łączna (3)          | 80,3% | Urban-rural | 26,1 | 34 | No   | 66,8  | 69,3  | 90,3  |
| 0610062 | Spiczyn (2)         | 62,6% | Rural       | 21   | 30 | No   | 15,6  | 17,1  | 71,1  |
| 0614083 | Nałęczów (3)        | 68,9% | Urban-rural | 30,5 | 35 | No   | 23,9  | 43,7  | 98,9  |
| 0617011 | Świdnik (1)         | 58,6% | Urban       | 12   | 15 | Yes  | 133,7 | 136,1 | 95,2  |
| 0617022 | Mełgiew (2)         | 70,7% | Rural       | 17,1 | 24 | No   | 19,9  | 19,9  | 94,8  |
| 0617033 | Piaski (3)          | 85,1% | Urban-rural | 28,1 | 32 | No   | 27,7  | 27,7  | 95    |
| 0663011 | Lublin (1)          | 48,7% | Urban       | -    | -  | Core | 98,3  | 98,3  | 100,2 |
| 1201011 | Bochnia (1)         | 45,3% | Urban       | 49,8 | 50 | No   | 187,4 | 187,4 | 83,7  |
| 1201022 | Bochnia (2)         | 51,9% | Rural       | 49,8 | 50 | No   | 36,9  | 35,3  | 84,2  |
| 1201032 | Drwinia (2)         | 35,6% | Rural       | 41,8 | 60 | No   | 23,0  | 24,4  | 84,2  |
| 1201052 | Łapanów (2)         | 62,1% | Rural       | 41,6 | 60 | No   | 60,8  | 64,7  | 75,3  |
| 1201063 | Nowy Wiśnicz (3)    | 65,5% | Urban-rural | 48,8 | 60 | No   | 4,8   | 33,5  | 78,3  |
| 1201072 | Rzezawa (2)         | 41,6% | Rural       | 54   | 60 | No   | 88,9  | 88,5  | 67,6  |
| 1201082 | Trzciana (2)        | 74,9% | Rural       | 47,9 | 62 | No   | 88,5  | 88,5  | 69,2  |
| 1201092 | Żegocina (2)        | 67,4% | Rural       | 54,7 | 70 | No   | 133,4 | 134,1 | 69,2  |
| 1206012 | Czernichów (2)      | 49,5% | Rural       | 28,5 | 40 | No   | 109,8 | 109,6 | 79,7  |
| 1206022 | Igołomia-Wawrzeń    | 76,6% | Rural       | 23,9 | 38 | Yes  | 164,1 | 163,8 | 98,9  |
| 1206032 | Iwanowice (2)       | 74,4% | Rural       | 22,3 | 31 | No   | 35,4  | 35,3  | 97,8  |
| 1206042 | Jerzmanowice-Prz    | 67,3% | Rural       | 28,4 | 33 | No   | 100,9 | 101,1 | 78,8  |
| 1206052 | Kocmyrzów-Luborz    | 72,7% | Rural       | 19,7 | 28 | Yes  | 100,6 | 101,6 | 101   |
| 1206063 | Krzeszowice (3)     | 26,1% | Urban-rural | 29,3 | 40 | No   | 46,4  | 46,4  | 80    |
| 1206072 | Liszki (2)          | 46,7% | Rural       | 17   | 27 | Yes  | 102,7 | 103,4 | 86,8  |
| 1206082 | Michałowice (2)     | 60,8% | Rural       | 13,7 | 21 | Yes  | 332,6 | 333,3 | 96,2  |
| 1206092 | Mogilany (2)        | 36,8% | Rural       | 16,9 | 27 | Yes  | 197,1 | 196,9 | 80,1  |

|         |                           |       |             |      |    |      |       |       |      |
|---------|---------------------------|-------|-------------|------|----|------|-------|-------|------|
| 1206103 | Skala (3)                 | 54,1% | Urban-rural | 22   | 31 | No   | 194,9 | 145,4 | 92,6 |
| 1206113 | Skawina (3)               | 35,5% | Urban-rural | 20,3 | 27 | Yes  | 157,9 | 157,7 | 84,7 |
| 1206123 | Słomniki (3)              | 70,0% | Urban-rural | 24,2 | 30 | No   | 86,3  | 85,7  | 96,2 |
| 1206132 | Sułoszowa (2)             | 80,9% | Rural       | 33,4 | 45 | No   | 39,3  | 39,3  | 80,7 |
| 1206143 | Świątniki Górne (3)       | 45,0% | Urban-rural | 20,1 | 32 | Yes  | 163,6 | 162,9 | 78,8 |
| 1206152 | Wielka Wieś (2)           | 52,9% | Rural       | 16,6 | 23 | Yes  | 114,3 | 114,1 | 88,8 |
| 1206162 | Zabierzów (2)             | 53,8% | Rural       | 20   | 35 | Yes  | 103,4 | 99,4  | 90,4 |
| 1206172 | Zielonki (2)              | 60,8% | Rural       | 9,4  | 17 | Yes  | 178,1 | 162,3 | 97,9 |
| 1208022 | Golcza (2)                | 77,4% | Rural       | 35,8 | 47 | No   | 84,2  | 84,9  | 89   |
| 1209013 | Dobczyce (3)              | 33,8% | Urban-rural | 32,5 | 50 | No   | 105,1 | 105,2 | 72,5 |
| 1209022 | Lubień (2)                | 51,5% | Rural       | 54,6 | 56 | No   | 28,0  | 28,0  | 52,9 |
| 1209033 | Myślenice (3)             | 53,0% | Urban-rural | 33,3 | 40 | No   | 37,7  | 38,1  | 68   |
| 1209042 | Pcim (2)                  | 64,6% | Rural       | 45,9 | 60 | No   | 35,0  | 29,3  | 51,3 |
| 1209052 | Raciechowice (2)          | 67,5% | Rural       | 37,8 | 55 | No   | 80,4  | 80,2  | 67,7 |
| 1209062 | Siepraw (2)               | 62,2% | Rural       | 27,4 | 42 | No   | 127,2 | 127,3 | 72,5 |
| 1209073 | Sułkowice (3)             | 53,5% | Urban-rural | 33,7 | 40 | No   | 87,6  | 87,7  | 70,8 |
| 1209082 | Tokarnia (2)              | 52,1% | Rural       | 56,1 | 62 | No   | 34,4  | 34,5  | 46,6 |
| 1209092 | Wiśniowa (2)              | 62,7% | Rural       | 43,8 | 60 | No   | 31,2  | 33,5  | 53,1 |
| 1212062 | Trzyciąż (2)              | 69,8% | Rural       | 32,7 | 45 | No   | 79,2  | 80,4  | 75,8 |
| 1214012 | Koniusza (2)              | 77,0% | Rural       | 25,4 | 32 | No   | 106,2 | 106,2 | 101  |
| 1214022 | Koszyce (2)               | 77,1% | Rural       | 53   | 60 | No   | 66,7  | 68,9  | 99,6 |
| 1214032 | Nowe Brzesko (2)          | 88,1% | Rural       | 35,9 | 52 | No   |       |       | 99,5 |
| 1214053 | Proszowice (3)            | 80,4% | Urban-rural | 31,7 | 40 | No   | 115,4 | 115,7 | 102  |
| 1218022 | Brzeźnica (2)             | 51,6% | Rural       | 35,1 | 47 | No   | 128,4 | 125,9 | 82,2 |
| 1218033 | Kalwaria Zebrzydowska (2) | 50,5% | Urban-rural | 37,6 | 45 | No   | 112,2 | 112,2 | 78,3 |
| 1218042 | Lanckorona (2)            | 62,6% | Rural       | 36,4 | 45 | No   | 97,8  | 98,0  | 75,3 |
| 1218072 | Stryków (2)               | 50,7% | Rural       | 45,3 | 60 | No   | 78,2  | 76,1  | 76,8 |
| 1218093 | Wadowice (3)              | 44,9% | Urban-rural | 51,6 | 60 | No   | 93,3  | 93,2  | 76,4 |
| 1219012 | Biskupice (2)             | 51,1% | Rural       | 23,7 | 42 | No   | 141,5 | 136,5 | 88,7 |
| 1219022 | Gdów (2)                  | 62,9% | Rural       | 32,5 | 42 | No   | 86,1  | 86,1  | 87,9 |
| 1219032 | Kłaj (2)                  | 24,6% | Rural       | 33,6 | 40 | No   | 92,7  | 105,6 | 88,6 |
| 1219043 | Niepołomice (3)           | 48,3% | Urban-rural | 25,4 | 40 | Yes  | 136,1 | 135,2 | 84,6 |
| 1219053 | Wieliczka (3)             | 42,2% | Urban-rural | 15   | 27 | Yes  | 187,9 | 188,3 | 82,1 |
| 1261011 | Kraków (1)                | 21,9% | Urban       | -    | -  | Core | 215,1 | 214,4 | 87,7 |
| 1405011 | Milanówek (1)             | 31,6% | Urban       | 29,7 | 37 | No   | 238,2 | 244,5 | 57,9 |
| 1405021 | Podkowa Leśna (1)         | 12,4% | Urban       | 29,4 | 34 | No   | 142,3 | 142,2 | 42,9 |

|         |                          |       |             |      |    |     |       |       |      |
|---------|--------------------------|-------|-------------|------|----|-----|-------|-------|------|
| 1405032 | Baranów (2)              | 72,7% | Rural       | 44   | 42 | No  | 24,4  | 25,5  | 73,4 |
| 1405043 | Grodzisk Mazowiecki (2)  | 36,3% | Urban-rural | 37,8 | 36 | No  | 41,6  | 45,2  | 64,1 |
| 1405052 | Jaktorów (2)             | 41,7% | Rural       | 45,6 | 45 | No  | 21,7  | 21,7  | 50,6 |
| 1405062 | Żabia Wola (2)           | 38,9% | Rural       | 36,2 | 40 | No  | 11,0  | 11,0  | 54,3 |
| 1406032 | Chynów (2)               | 65,0% | Rural       | 44,7 | 60 | No  | 32,8  | 33,5  | 59,3 |
| 1406053 | Grójec (3)               | 54,2% | Urban-rural | 47,1 | 45 | No  | 44,8  | 44,6  | 67,8 |
| 1406092 | Pniewy (2)               | 56,9% | Rural       | 46,3 | 47 | No  | 21,6  | 21,5  | 62,9 |
| 1408011 | Legionowo (1)            | 24,0% | Urban       | 25,8 | 48 | No  | 323,5 | 324,2 | 40,8 |
| 1408022 | Jabłonna (2)             | 18,0% | Rural       | 28,8 | 40 | Yes | 3,8   | 9,1   | 50,6 |
| 1408032 | Nieporęt (2)             | 23,8% | Rural       | 27,4 | 40 | Yes | 49,7  | 51,0  | 49,6 |
| 1408043 | Serock (3)               | 44,3% | Urban-rural | 43,8 | 52 | No  | 46,1  | 46,6  | 50,3 |
| 1408052 | Wieliszew (2) *          | 20,3% | Rural       | 34,3 | 50 | No  | 25,2  | 27,4  | 39,3 |
| 1412011 | Mińsk Mazowiecki (1)     | 35,5% | Urban       | 41,8 | 60 | No  | 250,9 | 260,5 | 54,3 |
| 1412042 | Ceglów (2)               | 48,4% | Rural       | 63,6 | 70 | No  | 41,8  | 41,8  | 66,6 |
| 1412052 | Dębe Wielkie (2)         | 43,0% | Rural       | 36   | 50 | No  | 55,9  | 55,9  | 57,2 |
| 1412062 | Dobre (2)                | 58,8% | Rural       | 53,9 | 62 | No  | 9,6   | 9,6   | 54   |
| 1412073 | Halinów (3) *            | 36,2% | Urban-rural | 29,3 | 42 | Yes | 36,5  | 36,5  | 50,2 |
| 1412082 | Jakubów (2)              | 70,3% | Rural       | 51,4 | 57 | No  | 12,2  | 12,2  | 60,2 |
| 1412093 | Kałużyn (3)              | 62,0% | Urban-rural | 59,3 | 62 | No  | 10,6  | 11,0  | 55,8 |
| 1412102 | Łatowicz (2)             | 81,6% | Rural       | 70,2 | 75 | No  | 13,6  | 13,7  | 62,2 |
| 1412112 | Mińsk Mazowiecki (2)     | 52,8% | Rural       | 41,8 | 55 | No  | 46,2  | 46,2  | 64   |
| 1412122 | Mrozy (2)                | 47,8% | Rural       | 77   | 85 | No  | 13,2  | 14,0  | 55,1 |
| 1412132 | Siennica (2)             | 66,6% | Rural       | 56,1 | 65 | No  | 17,6  | 17,6  | 58,8 |
| 1412142 | Stanisławów (2)          | 51,8% | Rural       | 43,1 | 52 | No  | 4,2   | 4,1   | 53,1 |
| 1412151 | Sulejówek (1) *          | 16,2% | Urban       | 22,2 | 31 | Yes | 143,5 | 144,3 | 50,4 |
| 1414011 | Nowy Dwór Mazowiecki (1) | 12,5% | Urban       | 39,1 | 40 | No  | 131,5 | 124,0 | 61,3 |
| 1414022 | Czosnów (2)              | 30,5% | Rural       | 35,5 | 40 | No  | 55,6  | 55,5  | 53,2 |
| 1414032 | Leoncin (2)              | 25,6% | Rural       | 54,9 | 65 | No  | 5,4   | 5,5   | 48,8 |
| 1414052 | Pomiechówek (2)          | 44,3% | Rural       | 43,5 | 45 | No  | 12,9  | 13,4  | 56,5 |
| 1414063 | Zakroczym (3)            | 58,6% | Urban-rural | 43,2 | 42 | No  | 26,6  | 26,6  | 63,7 |
| 1417011 | Józefów (1)              | 6,8%  | Urban       | 22,7 | 30 | Yes | 234,1 | 234,2 | 46,6 |
| 1417021 | Otwock (1)               | 25,2% | Urban       | 26,4 | 32 | Yes | 97,0  | 99,0  | 46,3 |
| 1417032 | Celestynów (2)           | 27,4% | Rural       | 45,2 | 52 | No  | 4,5   | 4,5   | 47   |
| 1417043 | Karczew (3)              | 30,0% | Urban-rural | 31,8 | 37 | No  | 19,6  | 19,6  | 67   |
| 1417052 | Kołbiel (2)              | 52,9% | Rural       | 45   | 50 | No  | 9,9   | 9,9   | 58,3 |
| 1417082 | Wiązowna (2)             | 39,4% | Rural       | 28,5 | 37 | Yes | 7,9   | 8,7   | 50,6 |

|         |                         |       |             |      |    |     |       |       |      |
|---------|-------------------------|-------|-------------|------|----|-----|-------|-------|------|
| 1418013 | Góra Kalwaria (3)       | 48,1% | Urban-rural | 34,3 | 50 | No  | 33,4  | 33,8  | 61   |
| 1418023 | Konstancin-Jeziorna (3) | 27,2% | Urban-rural | 19   | 32 | Yes | 135,1 | 134,9 | 74,7 |
| 1418032 | Lesznowola (2)          | 55,4% | Rural       | 21,2 | 24 | Yes | 89,6  | 89,6  | 67,6 |
| 1418043 | Piasечно (3)            | 26,9% | Urban-rural | 16,8 | 30 | Yes | 81,9  | 81,9  | 59,1 |
| 1418052 | Prażmów (2)             | 43,1% | Rural       | 31,8 | 50 | No  | 33,7  | 35,9  | 55,2 |
| 1418063 | Tarczyn (3) *           | 63,3% | Urban-rural | 32,7 | 32 | No  | 0,0   | 0,0   | 58,9 |
| 1421011 | Piastów (1)             | 60,5% | Urban       | 15,7 | 20 | Yes | 648,0 | 652,1 | 83,9 |
| 1421021 | Pruszków (1)            | 35,7% | Urban       | 16,4 | 22 | Yes | 233,1 | 232,8 | 68,4 |
| 1421033 | Brwinów (3)             | 28,3% | Urban-rural | 28,4 | 33 | No  | 63,4  | 71,8  | 71   |
| 1421042 | Michałowice (2)         | 34,2% | Rural       | 15,4 | 18 | Yes | 123,7 | 123,8 | 69,2 |
| 1421052 | Nadarzyn (2)            | 22,1% | Rural       | 25,3 | 27 | No  | 80,4  | 80,4  | 58,9 |
| 1421062 | Raszyn (2)              | 42,5% | Rural       | 16,7 | 24 | Yes | 202,8 | 164,0 | 64,7 |
| 1428011 | Sochaczew (1)           | 87,8% | Urban       | 58,9 | 65 | No  | 101,4 | 114,3 | 69,4 |
| 1428022 | Brochów (2) *           | 43,7% | Rural       | 64,8 | 70 | No  | 1,0   | 1,0   | 53,4 |
| 1428052 | Nowa Sucha (2)          | 70,1% | Rural       | 65,5 | 55 | No  | 33,2  | 33,2  | 67,4 |
| 1428072 | Sochaczew (2)           | 67,9% | Rural       | 59,5 | 67 | No  | 0,0   | 35,1  | 69,1 |
| 1428082 | Teresin (2)             | 67,7% | Rural       | 53,9 | 52 | No  | 28,4  | 40,5  | 80,7 |
| 1432013 | Błonie (3)              | 65,7% | Urban-rural | 35,5 | 40 | No  | 58,5  | 58,6  | 84,9 |
| 1432022 | Izabelin (2)            | 2,5%  | Rural       | 25,5 | 35 | Yes | 35,2  | 36,0  | 57,2 |
| 1432032 | Kampinos (2)            | 44,1% | Rural       | 45,1 | 52 | No  | 49,7  | 49,6  | 55   |
| 1432042 | Leszno (2)              | 44,8% | Rural       | 33,5 | 40 | No  | 7,2   | 7,2   | 67,8 |
| 1432053 | Łomianki (3)            | 28,2% | Urban-rural | 21   | 32 | Yes | 180,0 | 178,2 | 60,7 |
| 1432063 | Ożarów Mazowiecki (2)   | 66,2% | Urban-rural | 20,3 | 25 | Yes | 47,9  | 63,4  | 94   |
| 1432072 | Stare Babice (2)        | 46,2% | Rural       | 20,9 | 30 | Yes | 86,5  | 75,2  | 59,2 |
| 1434011 | Kobyłka (1)             | 25,0% | Urban       | 24,9 | 37 | Yes | 213,0 | 215,2 | 41,3 |
| 1434021 | Marki (1)               | 16,5% | Urban       | 14,5 | 30 | Yes | 292,2 | 234,4 | 46,1 |
| 1434031 | Ząbki (1)               | 12,1% | Urban       | 11,8 | 24 | Yes | 288,9 | 291,1 | 41,4 |
| 1434041 | Zielonka (1)            | 2,6%  | Urban       | 15,9 | 30 | Yes | 40,3  | 40,3  | 50,4 |
| 1434052 | Dąbrówka (2)            | 58,1% | Rural       | 47,9 | 60 | No  | 66,9  | 66,9  | 47,7 |
| 1434072 | Klembów (2)             | 57,9% | Rural       | 43,8 | 50 | No  | 73,4  | 74,6  | 45,1 |
| 1434082 | Poświętne (2)           | 63,2% | Rural       | 31,7 | 50 | No  | 11,3  | 11,4  | 46,7 |
| 1434093 | Radzymin (3)            | 48,2% | Urban-rural | 37,1 | 50 | No  | 54,2  | 54,4  | 46,9 |
| 1434113 | Tłuszcz (3)             | 51,8% | Urban-rural | 54,5 | 60 | No  | 108,9 | 109,8 | 45   |
| 1434123 | Wołomin (3)             | 38,3% | Urban-rural | 23,1 | 45 | No  | 122,1 | 151,6 | 46,7 |
| 1435042 | Somianka (2)            | 72,3% | Rural       | 59,1 | 62 | No  | 10,1  | 10,0  | 55,1 |
| 1435053 | Wyszków (3)             | 52,6% | Urban-rural | 62,4 | 62 | No  | 30,7  | 30,8  | 46,1 |

|         |                     |       |             |      |    |      |       |       |      |
|---------|---------------------|-------|-------------|------|----|------|-------|-------|------|
| 1435062 | Zabrodzie (2)       | 57,3% | Rural       | 52,7 | 57 | No   | 58,7  | 58,7  | 46,3 |
| 1438011 | Żyrardów (1)        | 36,1% | Urban       | 51,6 | 52 | No   | 255,7 | 265,9 | 47,8 |
| 1438023 | Mszczonów (3)       | 59,9% | Urban-rural | 45,1 | 40 | No   | 39,2  | 38,6  | 56   |
| 1438032 | Puszcza Mariańska   | 45,2% | Rural       | 67,9 | 55 | No   | 16,5  | 16,5  | 54,8 |
| 1438042 | Radziejowice (2)    | 41,7% | Rural       | 42,1 | 40 | No   | 15,0  | 15,7  | 50,3 |
| 1438052 | Wisitki (2)         | 64,0% | Rural       | 58,5 | 47 | No   | 53,0  | 53,1  | 65,4 |
| 1465011 | M.st.Warszawa (1)   | 23,0% | Urban       | -    | -  | Core | 146,7 | 184,6 | 67,2 |
| 2204011 | Pruszcz Gdański (1) | 18,8% | Urban       | 10,8 | 20 | Yes  | 208,3 | 225,6 | 82,2 |
| 2204022 | Cedry Wielkie (2)   | 72,6% | Rural       | 25,2 | 27 | Yes  | 27,0  | 27,9  | 94,5 |
| 2204032 | Kolbudy (2) *       | 30,5% | Rural       | 17,4 | 25 | Yes  | 25,4  | 25,4  | 64,8 |
| 2204042 | Pruszcz Gdański (2) | 47,3% | Rural       | 10,8 | 20 | Yes  | 45,7  | 45,7  | 81,9 |
| 2204052 | Przywidz (2)        | 38,7% | Rural       | 32,9 | 42 | No   | 11,6  | 11,6  | 52   |
| 2204062 | Pszczółki (2)       | 76,0% | Rural       | 22,2 | 33 | No   | 17,3  | 17,9  | 90,6 |
| 2204072 | Suchy Dąb (2)       | 55,5% | Rural       | 26,4 | 30 | No   | 26,1  | 26,2  | 90,3 |
| 2204082 | Trąbki Wielkie (2)  | 35,5% | Rural       | 25   | 34 | No   | 11,7  | 15,1  | 70,2 |
| 2205012 | Chmielno (2)        | 63,6% | Rural       | 42,5 | 55 | No   | 26,5  | 30,6  | 42,7 |
| 2205023 | Kartuzy (3)         | 41,1% | Urban-rural | 33,4 | 45 | No   | 21,5  | 21,4  | 44,9 |
| 2205032 | Przodkowo (2)       | 72,2% | Rural       | 29,6 | 45 | No   | 5,6   | 6,9   | 49,4 |
| 2205042 | Sierakowice (2)     | 77,6% | Rural       | 56,9 | 85 | No   | 17,3  | 17,3  | 40,3 |
| 2205052 | Somonino (2)        | 43,4% | Rural       | 37,8 | 45 | No   | 30,3  | 30,3  | 49,2 |
| 2205062 | Stężyca (2)         | 55,4% | Rural       | 56   | 65 | No   | 13,8  | 14,3  | 36,5 |
| 2205072 | Sulęczyno (2)       | 58,9% | Rural       | 64,8 | 75 | No   | 12,6  | 12,7  | 36,2 |
| 2205083 | Żukowo (3)          | 52,2% | Urban-rural | 22,8 | 32 | Yes  | 21,3  | 21,3  | 58,1 |
| 2208011 | Lębork (1)          | 40,6% | Urban       | 52,6 | 70 | No   | 178,1 | 181,7 | 58,2 |
| 2208021 | Łeba (1)            | 10,2% | Urban       | 79,1 | 82 | No   | 92,8  | 92,6  | 50,4 |
| 2208032 | Cewice (2)          | 25,5% | Rural       | 66,7 | 70 | No   | 6,3   | 6,3   | 51,1 |
| 2208042 | Nowa Wieś Lęborska  | 38,4% | Rural       | 59,6 | 75 | No   | 3,4   | 3,6   | 66,8 |
| 2208052 | Wicko (2)           | 30,5% | Rural       | 69   | 85 | No   | 1,5   | 1,6   | 63,2 |
| 2209011 | Malbork (1)         | 40,5% | Urban       | 67   | 65 | No   | 73,5  | 73,4  | 90,5 |
| 2209032 | Lichnowy (2)        | 59,2% | Rural       | 47,6 | 50 | No   | 11,3  | 11,3  | 99,9 |
| 2209042 | Malbork (2)         | 57,5% | Rural       | 67   | 65 | No   | 16,8  | 16,9  | 96,1 |
| 2209062 | Miłoradz (2)        | 40,5% | Rural       | 65,7 | 65 | No   | 15,1  | 15,2  | 93,9 |
| 2209073 | Nowy Staw (3)       | 51,4% | Urban-rural | 47,5 | 50 | No   | 5,5   | 5,5   | 97,8 |
| 2209082 | Stare Pole (2)      | 69,7% | Rural       | 72,6 | 80 | No   | 6,3   | 7,5   | 93,9 |
| 2210011 | Krynica Morska (1)  | 0,6%  | Urban       | 70,2 | 70 | No   | 7,9   | 7,5   | 56   |
| 2210023 | Nowy Dwór Gdański   | 50,3% | Urban-rural | 42   | 45 | No   | 34,1  | 36,0  | 95,7 |

|         |                  |       |             |      |    |      |       |       |      |
|---------|------------------|-------|-------------|------|----|------|-------|-------|------|
| 2210032 | Ostaszewo (2)    | 69,4% | Rural       | 33,9 | 40 | No   | 17,1  | 17,1  | 98,6 |
| 2210042 | Stegna (2)       | 45,3% | Rural       | 46,6 | 50 | Yes  | 48,8  | 48,7  | 93,7 |
| 2210052 | Sztutowo (2)     | 33,3% | Rural       | 51   | 52 | No   | 8,1   | 7,8   | 92,4 |
| 2211011 | Hel (1)          | 0,0%  | Urban       | 68,7 | 80 | No   | 32,3  | 19,6  | 0    |
| 2211031 | Puck (1)         | 15,3% | Urban       | 25,6 | 34 | No   | 371,4 | 411,2 | 74,6 |
| 2211041 | Władysławowo (1) | 43,7% | Urban       | 33,8 | 42 | No   | 83,3  | 94,6  | 50,3 |
| 2211052 | Kosakowo (2)     | 51,9% | Rural       | 7,8  | 18 | Yes  | 4,2   | 4,1   | 58,3 |
| 2211062 | Krokowa (2)      | 30,4% | Rural       | 39,2 | 48 | No   | 6,1   | 6,1   | 62,7 |
| 2211072 | Puck (2)         | 46,8% | Rural       | 25,6 | 34 | No   | 8,3   | 8,4   | 74,6 |
| 2214011 | Tczew (1)        | 34,4% | Urban       | 33,2 | 47 | No   | 213,4 | 222,9 | 86,8 |
| 2214023 | Gniew (3)        | 48,8% | Urban-rural | 77,3 | 70 | No   | 36,4  | 36,5  | 76,9 |
| 2214032 | Morzeszczyn (2)  | 73,2% | Rural       | 65,8 | 55 | No   | 6,5   | 6,5   | 74,3 |
| 2214043 | Pelplin (3)      | 49,8% | Urban-rural | 57,4 | 45 | No   | 9,0   | 9,0   | 85,3 |
| 2214052 | Subkowy (2)      | 91,3% | Rural       | 45,3 | 50 | No   | 21,0  | 21,0  | 92,2 |
| 2214062 | Tczew (2)        | 58,4% | Rural       | 33,2 | 74 | No   | 14,2  | 14,2  | 83,1 |
| 2215011 | Reda (1)         | 28,9% | Urban       | 10,8 | 16 | Yes  | 79,4  | 73,2  | 50,2 |
| 2215021 | Rumia (1)        | 47,0% | Urban       | 6    | 10 | Yes  | 103,5 | 111,5 | 50,1 |
| 2215031 | Wejherowo (1)    | 23,0% | Urban       | 18,8 | 28 | Yes  | 106,9 | 112,2 | 47   |
| 2215042 | Choczewo (2)     | 26,6% | Rural       | 52,1 | 65 | No   | 2,2   | 2,2   | 68,9 |
| 2215052 | Gniewino (2)     | 22,8% | Rural       | 39,5 | 55 | No   | 10,2  | 7,4   | 67,6 |
| 2215062 | Linia (2)        | 66,5% | Rural       | 45,7 | 55 | No   | 11,7  | 12,2  | 44,5 |
| 2215072 | Luzino (2)       | 49,8% | Rural       | 30   | 45 | No   | 9,5   | 9,9   | 53,4 |
| 2215082 | Łęczyce (2)      | 34,1% | Rural       | 43,1 | 58 | No   | 7,7   | 7,7   | 55,8 |
| 2215092 | Szemud (2)       | 74,8% | Rural       | 26,6 | 40 | Yes  | 3,5   | 3,5   | 67,4 |
| 2215102 | Wejherowo (2)    | 25,0% | Rural       | 24,4 | 40 | Yes  | 11,9  | 11,8  | 55,3 |
| 2261011 | Gdańsk (1)       | 22,2% | Urban       | -    | -  | Core | 137,7 | 137,8 | 68,2 |
| 2262011 | Gdynia (1)       | 15,5% | Urban       | -    | -  | Core | 119,7 | 120,8 | 47,2 |
| 2264011 | Sopot (1)        | 11,5% | Urban       | -    | -  | Core | 169,8 | 170,0 | 44,7 |
| 3003011 | Gnieszno (1)     | 51,8% | Urban       | 53,5 | 57 | No   | 113,8 | 117,7 | 64,8 |
| 3003023 | Czarniejewo (3)  | 39,9% | Urban-rural | 47,5 | 55 | No   | 39,8  | 43,0  | 72,3 |
| 3003032 | Gnieszno (2)     | 66,0% | Rural       | 53,5 | 57 | No   | 26,9  | 27,1  | 66,3 |
| 3003042 | Kiszkowo (2)     | 84,3% | Rural       | 43,5 | 60 | No   | 28,8  | 28,8  | 62,8 |
| 3003062 | Łubowo (2)       | 74,2% | Rural       | 37,8 | 50 | No   | 13,8  | 13,8  | 67,3 |
| 3005012 | Granowo (2)      | 56,2% | Rural       | 36   | 55 | No   | 21,2  | 21,4  | 76,2 |
| 3005023 | Grodzisk Wielkop | 63,2% | Urban-rural | 49,7 | 65 | No   | 31,2  | 31,5  | 65,9 |
| 3011011 | Kościan (1)      | 29,1% | Urban       | 48,7 | 65 | No   | 135,5 | 155,4 | 61,1 |

|         |                    |       |             |      |    |     |       |       |       |
|---------|--------------------|-------|-------------|------|----|-----|-------|-------|-------|
| 3011023 | Czempiń (3)        | 41,8% | Urban-rural | 35,7 | 55 | No  | 8,4   | 8,4   | 79,9  |
| 3011032 | Kościan (2)        | 48,1% | Rural       | 48,7 | 65 | No  | 5,4   | 5,4   | 65,5  |
| 3015043 | Nowy Tomyśl (3)    | 49,8% | Urban-rural | 66,6 | 55 | No  | 12,5  | 12,5  | 46,6  |
| 3015053 | Opalenica (3)      | 47,9% | Urban-rural | 43,7 | 52 | No  | 27,0  | 27,3  | 73    |
| 3016013 | Oborniki (3)       | 31,6% | Urban-rural | 31,8 | 52 | No  | 8,8   | 9,4   | 71,6  |
| 3016023 | Rogoźno (3)        | 49,4% | Urban-rural | 46,1 | 62 | No  | 14,2  | 14,3  | 62,9  |
| 3021011 | Luboń (1)          | 33,5% | Urban       | 9,9  | 23 | Yes | 333,6 | 348,1 | 62,1  |
| 3021021 | Puszczykowo (1)    | 25,8% | Urban       | 16   | 30 | Yes | 174,2 | 177,1 | 44,4  |
| 3021033 | Buk (3)            | 73,0% | Urban-rural | 34,2 | 45 | No  | 22,4  | 22,3  | 70,8  |
| 3021042 | Czerwonak (2)      | 16,3% | Rural       | 17,2 | 30 | Yes | 45,7  | 45,6  | 55    |
| 3021052 | Dopiewo (2)        | 50,3% | Rural       | 18,8 | 35 | Yes | 27,2  | 27,2  | 69,4  |
| 3021062 | Kleszczewo (2)     | 77,5% | Rural       | 20,7 | 30 | Yes | 16,7  | 21,3  | 81,1  |
| 3021072 | Komorniki (2)      | 65,2% | Rural       | 12,7 | 25 | Yes | 3,0   | 3,0   | 76,6  |
| 3021083 | Kostrzyn (3)       | 49,6% | Urban-rural | 33,8 | 38 | No  | 38,9  | 38,8  | 72,1  |
| 3021093 | Kórnik (3)         | 45,4% | Urban-rural | 28,7 | 34 | Yes | 19,9  | 23,4  | 68,3  |
| 3021103 | Mosina (3)         | 60,9% | Urban-rural | 24,3 | 35 | Yes | 17,3  | 17,7  | 49,8  |
| 3021113 | Murowana Goślina   | 30,3% | Urban-rural | 30,5 | 47 | No  | 27,2  | 36,8  | 58    |
| 3021123 | Pobiedziska (3)    | 40,3% | Urban-rural | 49,3 | 55 | No  | 33,9  | 34,2  | 61,1  |
| 3021132 | Rokietnica (2)     | 45,5% | Rural       | 22,2 | 34 | Yes | 14,8  | 15,8  | 75,4  |
| 3021143 | Stęszew (3)        | 42,4% | Urban-rural | 25,2 | 40 | No  | 16,5  | 19,2  | 73,9  |
| 3021152 | Suchy Las (2)      | 19,9% | Rural       | 10,1 | 23 | Yes | 2,9   | 24,4  | 56,1  |
| 3021163 | Swarzędz (3)       | 42,0% | Urban-rural | 17,3 | 34 | Yes | 14,3  | 31,7  | 66,8  |
| 3021172 | Tarnowo Podgórne   | 55,8% | Rural       | 17,7 | 33 | Yes | 9,9   | 9,8   | 66,4  |
| 3024022 | Duszniki (2)       | 72,3% | Rural       | 41   | 47 | No  | 5,0   | 5,0   | 67,9  |
| 3024032 | Kaźmierz (2)       | 35,7% | Rural       | 34,4 | 37 | No  | 25,8  | 29,3  | 77,6  |
| 3024073 | Szamotuły (3)      | 53,4% | Urban-rural | 39,6 | 47 | No  | 41,1  | 44,7  | 70,3  |
| 3025012 | Dominowo (2)       | 74,1% | Rural       | 42,4 | 52 | No  | 35,7  | 35,7  | 72,7  |
| 3025043 | Środa Wielkopolska | 53,4% | Urban-rural | 36,4 | 42 | No  | 37,5  | 38,3  | 78,6  |
| 3025052 | Zaniemyśl (2)      | 47,9% | Rural       | 36,5 | 40 | No  | 15,2  | 15,8  | 65,6  |
| 3026012 | Brodnica (2)       | 39,2% | Rural       | 35,9 | 50 | No  | 9,4   | 9,4   | 75,8  |
| 3026043 | Śrem (3)           | 59,4% | Urban-rural | 43,8 | 47 | No  | 25,8  | 25,8  | 68    |
| 3028011 | Wągrowiec (1)      | 41,4% | Urban       | 60,3 | 70 | No  | 144,6 | 150,3 | 42,3  |
| 3028053 | Skoki (3)          | 34,5% | Urban-rural | 43,1 | 58 | No  | 15,7  | 15,7  | 54,2  |
| 3028072 | Wągrowiec (2)      | 54,7% | Rural       | 60,3 | 70 | No  | 12,4  | 12,7  | 41,04 |
| 3030033 | Nekla (3) *        | 46,4% | Urban-rural | 48,7 | 48 | No  | 45,9  | 49,1  | 58,6  |
| 3030053 | Września (3)       | 61,1% | Urban-rural | 52,7 | 48 | No  | 57,2  | 58,3  | 77,9  |



|         |            |       |       |   |   |      |       |       |      |
|---------|------------|-------|-------|---|---|------|-------|-------|------|
| 3064011 | Poznań (1) | 39,6% | Urban | - | - | Core | 190,6 | 190,8 | 60,7 |
|---------|------------|-------|-------|---|---|------|-------|-------|------|

**Source: data from Poland's Central Statistical Office (GUS)**

**\*\* Source:** Witek T. Waloryzacja rolniczej przestrzeni produkcyjnej Polski według gmin, IUNG: Puławy, Poland, 1994, pp. 166-248,
